# Supplementary material for: Identification and Characterization of Circular RNAs in Brassica rapa in Response to Plasmodiophora brassicae
Source: MDPI journal article supplement (doi:10.3390/ijms23105369), 2022-05-11
Supplement: s1 [file s1]

## Supplementary document

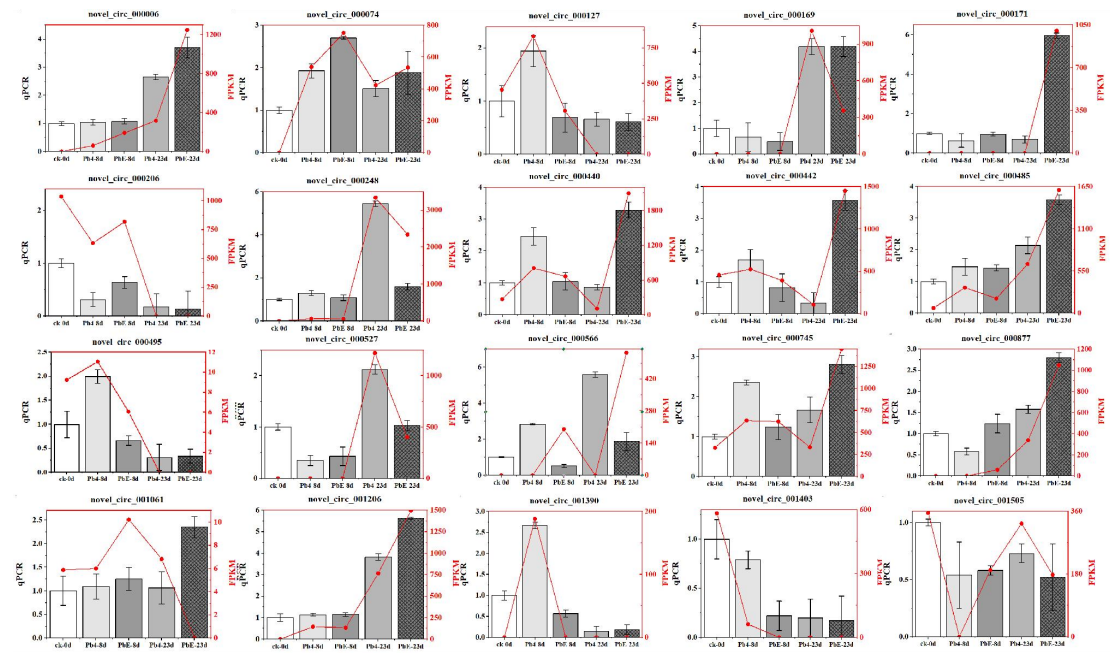

Figure S1. Quantitative real-time PCR validation for RNA-seq.

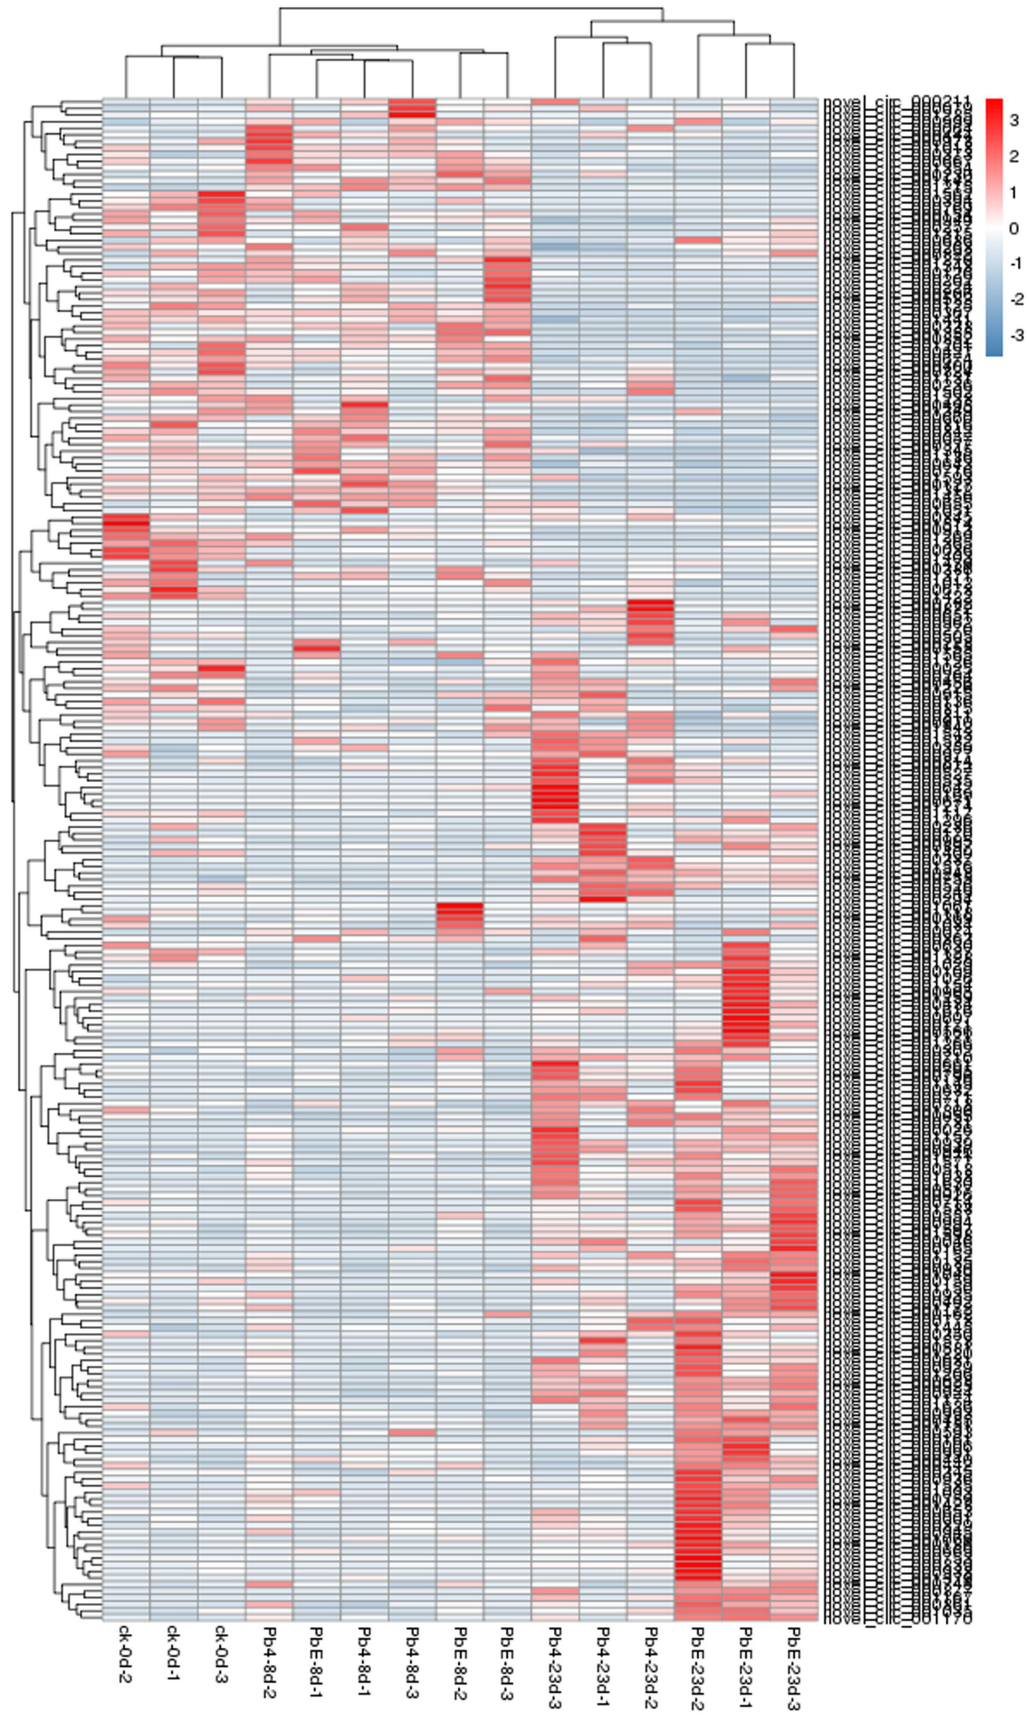

Figure S2. Heat map and clustering of circRNA expression profiles in different samples.

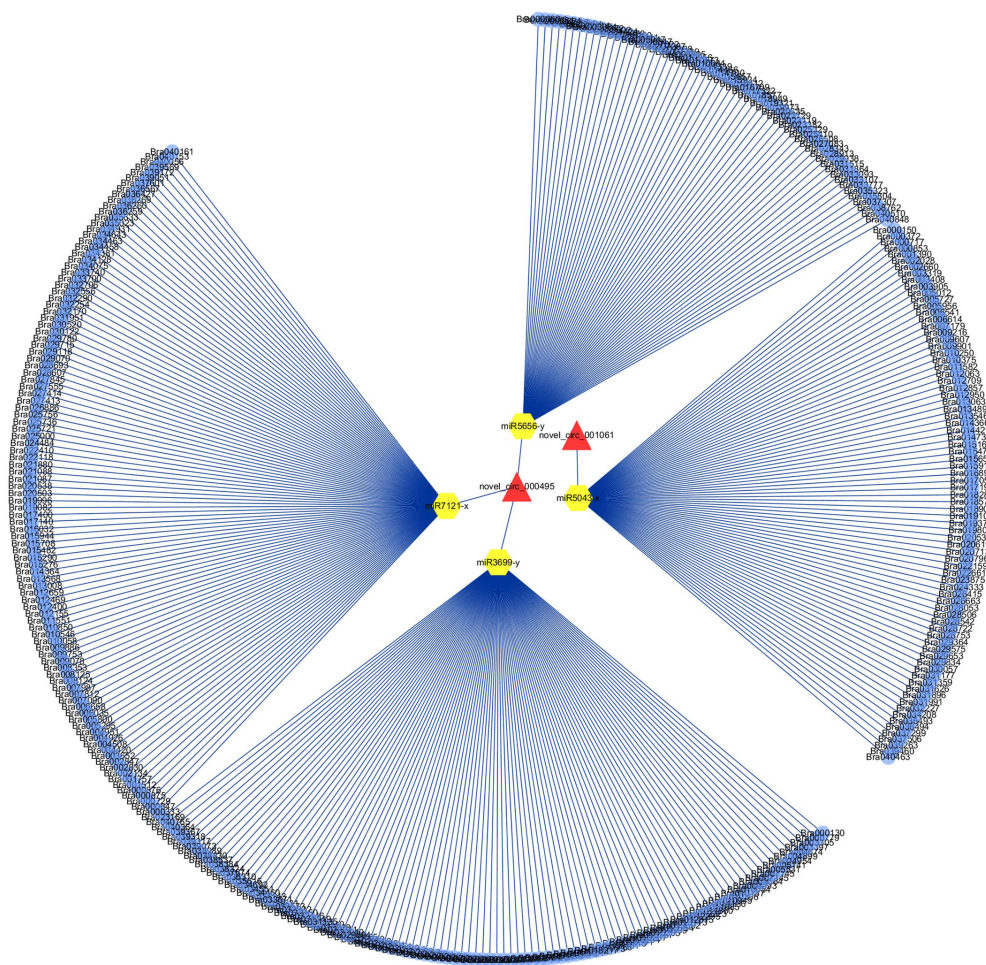

**Figure S3. View of the circRNA – miRNA – mRNA triple network *Brassica rapa*. The circRNAs, miRNAs, and mRNAs are indicated as yellow hexagons, red triangles, and blue diamonds, respectively.**

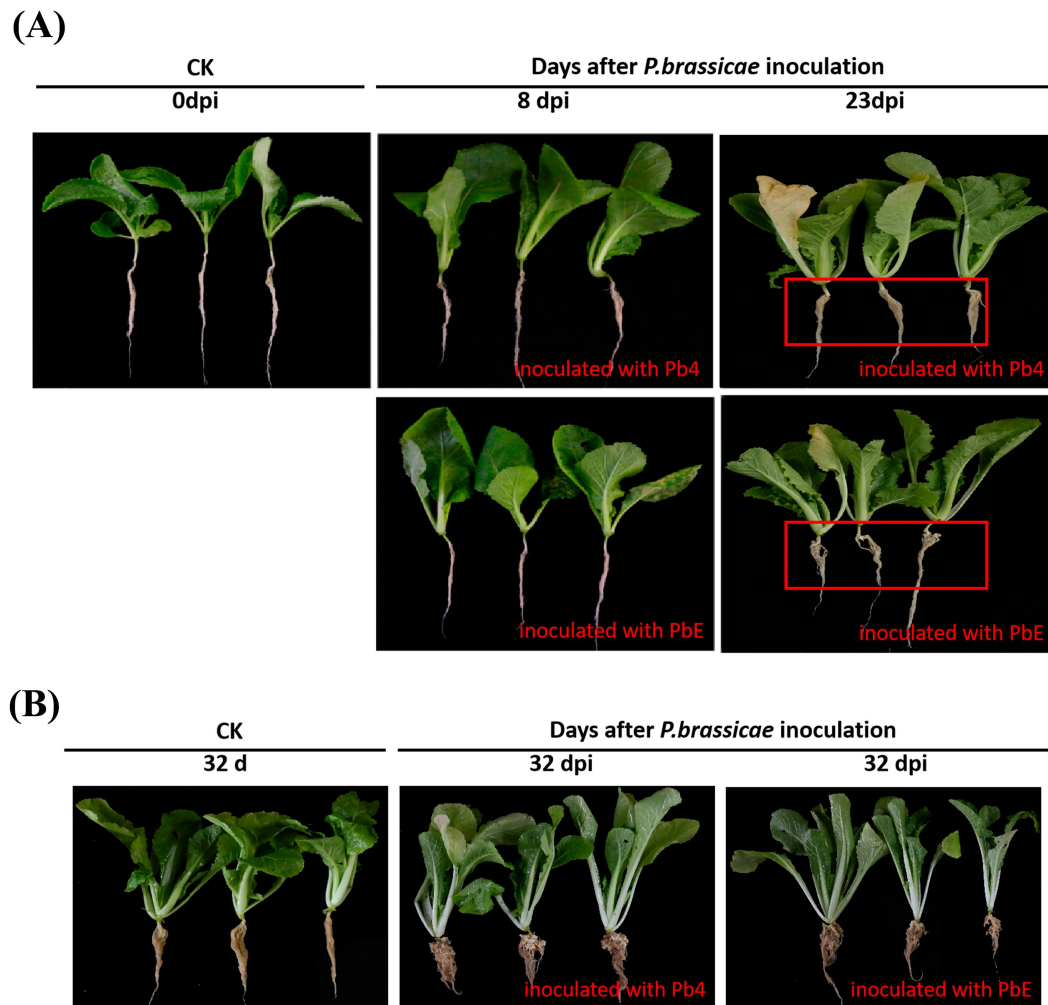

Figure S4. (A) Phenotype of roots in ‘BJN 222’ plants infected with *P. brassicae*. (B) Phenotype of roots in ‘BJN 3-2’ plants infected with *P. brassicae*.
