# Supplementary material for: Identification and Characterization of Circular RNAs in Brassica rapa in Response to Plasmodiophora brassicae
Source: Int J Mol Sci. 2022 May 11;23(10):5369. doi: 10.3390/ijms23105369 (PMC9141718; doi:10.3390/ijms23105369)
Supplement: Supplementary file 1 [file ijms-23-05369-s001.zip › Supplementary Tables.xlsx]

## Sheet: Table S1 
Table S1. The profile of circRNAs detected in this study.
id	Pb4-23d_rpm	Pb4-8d_rpm	PbE-23d_rpm	PbE-8d_rpm	ck-0d_rpm	Pb4-23d_count	Pb4-8d_count	PbE-23d_count	PbE-8d_count	ck-0d_count
novel_circ_000001	548.342	479.416	1317.81	116.433	177.462	1.66667	2.33333	4.33333	0.666667	1
novel_circ_000002	210.504	0	89.1504	57.8202	194.152	0.666667	0	0.333333	0.333333	1
novel_circ_000003	0	0	0	173.461	0	0	0	0	1	0
novel_circ_000004	0	186.498	0	66.9344	0	0	1	0	0.333333	0
novel_circ_000005	0	218.245	0	0	0	0	1	0	0	0
novel_circ_000006	318.694	62.1659	1249.77	191.689	0	1	0.333333	4.33333	1	0
novel_circ_000007	0	0	266.525	0	0	0	0	1	0	0
novel_circ_000008	337.838	0	0	0	339.443	1	0	0	0	1.66667
novel_circ_000009	225.225	64.0902	444.208	0	177.462	0.666667	0.333333	1.66667	0	1
novel_circ_000010	0	0	0	0	118.308	0	0	0	0	0.666667
novel_circ_000011	0	0	356.602	57.8202	268.438	0	0	1.33333	0.333333	1.33333
novel_circ_000012	0	124.332	0	0	0	0	0.666667	0	0	0
novel_circ_000013	0	145.497	0	0	262.82	0	0.666667	0	0	1.33333
novel_circ_000014	1403.56	1723.1	911.814	1061.37	2159.11	4.33333	8.66667	3.33333	6	11.3333
novel_circ_000015	631.512	0	0	0	0	2	0	0	0	0
novel_circ_000016	0	248.663	0	0	0	0	1.33333	0	0	0
novel_circ_000017	764.722	320.451	890.268	589.695	134.219	2.33333	1.66667	3.33333	3.33333	0.666667
novel_circ_000018	426.884	126.256	0	0	370.836	1.33333	0.666667	0	0	2
novel_circ_000019	0	0	0	351.679	0	0	0	0	2	0
novel_circ_000020	112.613	398.009	0	234.453	268.438	0.333333	2	0	1.33333	1.33333
novel_circ_000021	0	248.663	0	0	0	0	1.33333	0	0	0
novel_circ_000022	0	323.336	444.208	249.509	203.666	0	1.66667	1.66667	1.33333	1
novel_circ_000023	0	0	0	351.679	0	0	0	0	2	0
novel_circ_000024	0	0	0	351.679	0	0	0	0	2	0
novel_circ_000025	225.225	62.1659	0	0	723.853	0.666667	0.333333	0	0	3.66667
novel_circ_000026	900.901	399.933	801.427	259.416	0	2.66667	2	3	1.33333	0
novel_circ_000027	108.19	62.1659	379.383	58.6132	67.1096	0.333333	0.333333	1.33333	0.333333	0.333333
novel_circ_000028	337.838	0	0	0	0	1	0	0	0	0
novel_circ_000029	551.28	0	111.932	125.548	261.262	1.66667	0	0.333333	0.666667	1.33333
novel_circ_000030	112.613	261.17	223.864	292.273	0	0.333333	1.33333	0.666667	1.66667	0
novel_circ_000031	105.252	200.929	468.534	124.755	135.777	0.333333	1	1.66667	0.666667	0.666667
novel_circ_000032	0	0	355.366	0	0	0	0	1.33333	0	0
novel_circ_000033	0	0	0	175.84	0	0	0	0	1	0
novel_circ_000034	0	0	0	133.869	0	0	0	0	0.666667	0
novel_circ_000035	225.225	0	0	0	0	0.666667	0	0	0	0
novel_circ_000036	0	290.994	0	0	0	0	1.33333	0	0	0
novel_circ_000037	0	0	0	267.738	0	0	0	0	1.33333	0
novel_circ_000038	216.38	0	0	0	67.8887	0.666667	0	0	0	0.333333
novel_circ_000039	0	0	0	175.84	0	0	0	0	1	0
novel_circ_000040	0	0	178.301	0	0	0	0	0.666667	0	0
novel_circ_000041	736.765	0	0	0	0	2.33333	0	0	0	0
novel_circ_000042	0	0	0	58.6132	522.524	0	0	0	0.333333	2.66667
novel_circ_000043	0	192.271	0	0	0	0	1	0	0	0
novel_circ_000044	105.252	72.7484	0	291.48	0	0.333333	0.333333	0	1.66667	0
novel_circ_000045	225.225	382.617	645.908	517.247	599.496	0.666667	2	2.33333	2.66667	3.33333
novel_circ_000046	1295.4	271.753	1244.71	250.302	127.043	4	1.33333	4.66667	1.33333	0.666667
novel_circ_000047	0	0	0	0	118.308	0	0	0	0	0.666667
novel_circ_000048	0	0	0	401.606	0	0	0	0	2	0
novel_circ_000049	1126.13	462.099	111.932	115.64	422.034	3.33333	2.33333	0.333333	0.666667	2.33333
novel_circ_000050	0	0	0	0	402.658	0	0	0	0	2
novel_circ_000051	0	0	0	0	134.219	0	0	0	0	0.666667
novel_circ_000052	0	186.498	0	0	0	0	1	0	0	0
novel_circ_000053	0	0	0	0	236.616	0	0	0	0	1.33333
novel_circ_000054	324.57	488.074	0	585.767	303.726	1	2.33333	0	3	1.66667
novel_circ_000055	2629.03	616.254	2566.65	693.879	1293.51	8	3	8.66667	3.66667	6.66667
novel_circ_000056	0	393.2	0	175.84	0	0	2	0	1	0
novel_circ_000057	1419.77	2375.55	869.463	2556.02	2190.77	4.33333	12	3	14.3333	11.3333
novel_circ_000058	443.09	453.441	355.366	356.828	464.928	1.33333	2.33333	1.33333	2	2.33333
novel_circ_000059	0	0	0	57.8202	203.666	0	0	0	0.333333	1
novel_circ_000060	112.613	0	781.239	174.254	67.1096	0.333333	0	2.66667	1	0.333333
novel_circ_000061	0	0	223.864	0	0	0	0	0.666667	0	0
novel_circ_000062	112.613	425.908	0	0	134.219	0.333333	2	0	0	0.666667
novel_circ_000063	0	427.832	177.683	58.6132	0	0	2	0.666667	0.333333	0
novel_circ_000064	646.202	1288.9	89.1504	434.463	67.8887	2	6.33333	0.333333	2.33333	0.333333
novel_circ_000065	432.76	256.361	0	57.8202	0	1.33333	1.33333	0	0.333333	0
novel_circ_000066	0	582.582	0	117.226	59.1541	0	3	0	0.666667	0.333333
novel_circ_000067	112.613	444.783	0	0	0	0.333333	2.33333	0	0	0
novel_circ_000068	634.45	62.1659	89.1504	242.774	543.109	2	0.333333	0.333333	1.33333	2.66667
novel_circ_000069	318.694	465.948	178.301	116.433	0	1	2.33333	0.666667	0.666667	0
novel_circ_000070	646.234	250.588	402.165	426.142	177.462	2	1.33333	1.33333	2.33333	1
novel_circ_000071	1286.56	1149.18	1116.11	669.709	542.33	4	5.66667	3.66667	3.66667	2.66667
novel_circ_000072	1547.1	569.115	602.629	375.85	269.997	4.66667	3	2	2	1.33333
novel_circ_000073	0	134.914	177.992	251.095	252.527	0	0.666667	0.666667	1.33333	1.33333
novel_circ_000074	423.946	538.697	534.593	751.7	0	1.33333	2.66667	2	4	0
novel_circ_000075	0	0	267.451	0	0	0	0	1	0	0
novel_circ_000076	105.252	447.668	536.878	700.615	269.997	0.333333	2.33333	1.66667	3.66667	1.33333
novel_circ_000077	217.865	323.336	335.796	435.256	0	0.666667	1.66667	1	2.33333	0
novel_circ_000078	540.981	331.994	177.683	66.9344	0	1.66667	1.66667	0.666667	0.333333	0
novel_circ_000079	750.001	1436.92	379.383	551.689	193.373	2.33333	7.33333	1.33333	3	1
novel_circ_000080	0	0	0	133.869	67.1096	0	0	0	0.666667	0.333333
novel_circ_000081	0	0	0	133.869	0	0	0	0	0.666667	0
novel_circ_000082	1092.26	474.606	177.992	242.774	660.638	3.33333	2.33333	0.666667	1.33333	3.33333
novel_circ_000083	773.567	0	355.675	0	405.774	2.33333	0	1.33333	0	2
novel_circ_000084	0	218.245	0	0	0	0	1	0	0	0
novel_circ_000085	330.477	706.914	734.749	375.057	557.811	1	3.66667	2.66667	2	3
novel_circ_000086	0	126.256	88.8415	58.6132	904.431	0	0.666667	0.333333	0.333333	4.66667
novel_circ_000087	321.632	62.1659	177.683	66.9344	118.308	1	0.333333	0.666667	0.333333	0.666667
novel_circ_000088	0	62.1659	0	468.541	339.443	0	0.333333	0	2.33333	1.66667
novel_circ_000089	225.225	290.994	0	289.101	520.966	0.666667	1.33333	0	1.66667	2.66667
novel_circ_000090	0	0	88.8415	0	236.616	0	0	0.333333	0	1.33333
novel_circ_000091	437.183	62.1659	780.312	184.161	67.8887	1.33333	0.333333	2.66667	1	0.333333
novel_circ_000092	210.504	0	0	0	0	0.666667	0	0	0	0
novel_circ_000093	0	0	0	468.113	135.777	0	0	0	2.66667	0.666667
novel_circ_000094	0	0	0	175.84	0	0	0	0	1	0
novel_circ_000095	526.26	271.753	177.683	133.869	0	1.66667	1.33333	0.666667	0.666667	0
novel_circ_000096	105.252	320.451	356.602	115.64	135.777	0.333333	1.66667	1.33333	0.666667	0.666667
novel_circ_000097	631.512	325.261	223.864	0	335.548	2	1.66667	0.666667	0	1.66667
novel_circ_000098	337.838	663.989	266.833	115.64	59.1541	1	3.33333	1	0.666667	0.333333
novel_circ_000099	1377.09	926.123	958.922	669.709	321.974	4.33333	4.66667	3.33333	3.66667	1.66667
novel_circ_000100	1969.6	1624.38	1651.63	733.471	783.786	6	8.33333	5.66667	4	4
novel_circ_000101	634.45	124.332	623.126	115.64	270.776	2	0.666667	2.33333	0.666667	1.33333
novel_circ_000102	1329.24	376.844	177.683	0	295.77	4	2	0.666667	0	1.66667
novel_circ_000103	450.45	72.7484	0	133.869	0	1.33333	0.333333	0	0.666667	0
novel_circ_000104	0	0	0	200.803	475.221	0	0	0	1	2.33333
novel_circ_000105	655.047	577.773	1073.14	451.898	134.219	2	3	3.33333	2.33333	0.666667
novel_circ_000106	675.676	136.839	645.599	117.226	67.8887	2	0.666667	2.33333	0.666667	0.333333
novel_circ_000107	0	0	178.301	520.382	203.666	0	0	0.666667	3	1
novel_circ_000108	337.838	209.587	266.525	57.8202	0	1	1	1	0.333333	0
novel_circ_000109	437.183	62.1659	1091.66	57.8202	67.8887	1.33333	0.333333	4	0.333333	0.333333
novel_circ_000110	225.225	513.683	267.451	58.6132	245.351	0.666667	2.66667	1	0.333333	1.33333
novel_circ_000111	225.225	374.92	111.932	251.095	67.1096	0.666667	2	0.333333	1.33333	0.333333
novel_circ_000112	426.884	710.168	313.014	192.482	313.24	1.33333	3.33333	1	1	1.66667
novel_circ_000113	886.18	538.697	1028.19	175.84	186.197	2.66667	2.66667	3.33333	1	1
novel_circ_000114	450.45	479.416	0	0	0	1.33333	2.33333	0	0	0
novel_circ_000115	421.008	62.1659	669.616	0	0	1.33333	0.333333	2.33333	0	0
novel_circ_000116	105.252	209.587	356.602	0	0	0.333333	1	1.33333	0	0
novel_circ_000117	0	518.492	0	173.461	0	0	2.66667	0	1	0
novel_circ_000118	0	186.498	0	0	0	0	1	0	0	0
novel_circ_000119	421.008	0	0	0	0	1.33333	0	0	0	0
novel_circ_000120	0	0	0	0	201.329	0	0	0	0	1
novel_circ_000121	323.117	126.256	0	116.433	269.217	1	0.666667	0	0.666667	1.33333
novel_circ_000122	545.373	64.0902	888.724	408.706	59.1541	1.66667	0.333333	3.33333	2.33333	0.333333
novel_circ_000123	337.838	124.332	89.1504	423.763	362.88	1	0.666667	0.333333	2.33333	2
novel_circ_000124	0	0	0	0	134.219	0	0	0	0	0.666667
novel_circ_000125	108.19	710.763	0	735.057	1011.67	0.333333	3.66667	0	4	5.33333
novel_circ_000126	112.613	282.336	0	649.894	590.413	0.333333	1.33333	0	3.66667	3
novel_circ_000127	0	832.209	0	307.329	455.414	0	4.33333	0	1.66667	2.33333
novel_circ_000128	1639.12	1057.19	1025.91	541.782	489.144	5	5.33333	3.66667	3	2.66667
novel_circ_000129	0	72.7484	88.8415	424.556	268.438	0	0.333333	0.333333	2.33333	1.33333
novel_circ_000130	0	497.327	0	0	0	0	2.66667	0	0	0
novel_circ_000131	0	0	0	0	252.527	0	0	0	0	1.33333
novel_circ_000132	0	0	0	0	134.219	0	0	0	0	0.666667
novel_circ_000133	0	145.497	0	0	0	0	0.666667	0	0	0
novel_circ_000134	0	0	0	0	177.462	0	0	0	0	1
novel_circ_000135	675.676	0	0	0	0	2	0	0	0	0
novel_circ_000136	758.846	271.753	88.8415	641.573	1197.52	2.33333	1.33333	0.333333	3.66667	6
novel_circ_000137	210.504	0	0	0	0	0.666667	0	0	0	0
novel_circ_000138	0	128.18	0	0	0	0	0.666667	0	0	0
novel_circ_000139	0	128.18	0	0	0	0	0.666667	0	0	0
novel_circ_000140	0	186.498	0	0	0	0	1	0	0	0
novel_circ_000141	1074.57	1105.89	1315.83	3026.61	2561.77	3.33333	5.66667	4.66667	16	13.3333
novel_circ_000142	548.342	207.663	0	234.453	0	1.66667	1	0	1.33333	0
novel_circ_000143	0	0	0	0	354.925	0	0	0	0	2
novel_circ_000144	0	0	0	0	201.329	0	0	0	0	1
novel_circ_000145	324.57	0	0	0	0	1	0	0	0	0
novel_circ_000146	0	0	0	133.869	0	0	0	0	0.666667	0
novel_circ_000147	0	0	0	117.226	0	0	0	0	0.666667	0
novel_circ_000148	318.694	909.767	200.773	691.5	469.767	1	4.66667	0.666667	3.66667	2.33333
novel_circ_000149	0	0	0	267.738	0	0	0	0	1.33333	0
novel_circ_000150	0	0	177.683	0	0	0	0	0.666667	0	0
novel_circ_000151	0	0	0	0	134.219	0	0	0	0	0.666667
novel_circ_000152	0	0	0	0	203.666	0	0	0	0	1
novel_circ_000153	0	0	0	117.226	0	0	0	0	0.666667	0
novel_circ_000154	0	186.498	0	898.611	1188.78	0	1	0	5	6
novel_circ_000155	0	0	445.443	868.889	457.752	0	0	1.66667	5	2.33333
novel_circ_000156	213.442	0	223.864	0	0	0.666667	0	0.666667	0	0
novel_circ_000157	432.76	62.1659	88.8415	0	67.1096	1.33333	0.333333	0.333333	0	0.333333
novel_circ_000158	112.613	72.7484	379.074	233.66	0	0.333333	0.333333	1.33333	1.33333	0
novel_circ_000159	337.838	62.1659	1468.88	124.755	530.479	1	0.333333	5.33333	0.666667	2.66667
novel_circ_000160	641.811	0	491.315	125.548	59.1541	2	0	1.66667	0.666667	0.333333
novel_circ_000161	210.504	145.497	1183.71	0	329.151	0.666667	0.666667	4	0	1.66667
novel_circ_000162	321.632	134.914	869.772	360	67.1096	1	0.666667	3	2	0.333333
novel_circ_000163	225.225	0	0	0	0	0.666667	0	0	0	0
novel_circ_000164	0	72.7484	356.293	125.548	67.8887	0	0.333333	1.33333	0.666667	0.333333
novel_circ_000165	315.756	186.498	1112.9	0	0	1	1	4	0	0
novel_circ_000166	337.838	0	0	0	0	1	0	0	0	0
novel_circ_000167	0	124.332	0	0	0	0	0.666667	0	0	0
novel_circ_000168	0	128.18	0	0	0	0	0.666667	0	0	0
novel_circ_000169	1009.09	0	355.675	0	0	3	0	1.33333	0	0
novel_circ_000170	1179.85	199.005	958.613	115.64	67.8887	3.66667	1	3.33333	0.666667	0.333333
novel_circ_000171	0	0	1002.51	0	0	0	0	3.66667	0	0
novel_circ_000172	0	64.0902	267.451	115.64	134.219	0	0.333333	1	0.666667	0.666667
novel_circ_000173	0	0	0	0	201.329	0	0	0	0	1
novel_circ_000174	105.252	0	177.683	0	0	0.333333	0	0.666667	0	0
novel_circ_000175	216.38	62.1659	201.082	133.869	67.1096	0.666667	0.333333	0.666667	0.666667	0.333333
novel_circ_000176	4102.53	6226.73	4210.93	7846.71	4966.66	12.6667	32	15	43.6667	25.6667
novel_circ_000177	0	0	0	0	177.462	0	0	0	0	1
novel_circ_000178	0	0	0	115.64	59.1541	0	0	0	0.666667	0.333333
novel_circ_000179	210.504	0	0	0	0	0.666667	0	0	0	0
novel_circ_000180	0	62.1659	201.082	182.575	271.555	0	0.333333	0.666667	1	1.33333
novel_circ_000181	0	0	178.301	0	0	0	0	0.666667	0	0
novel_circ_000182	315.756	320.451	536.878	232.867	201.329	1	1.66667	1.66667	1.33333	1
novel_circ_000183	0	0	0	267.738	0	0	0	0	1.33333	0
novel_circ_000184	0	192.271	0	0	0	0	1	0	0	0
novel_circ_000185	2160.92	1256.56	4969.39	425.349	395.481	6.66667	6	17.6667	2.33333	2
novel_circ_000186	650.625	207.663	2322.91	125.548	67.1096	2	1	7.66667	0.666667	0.333333
novel_circ_000187	210.504	0	0	0	0	0.666667	0	0	0	0
novel_circ_000188	210.504	0	0	0	0	0.666667	0	0	0	0
novel_circ_000189	0	190.346	267.142	719.208	193.373	0	1	1	4	1
novel_circ_000190	0	0	0	404.741	0	0	0	0	2.33333	0
novel_circ_000191	225.225	0	0	0	0	0.666667	0	0	0	0
novel_circ_000192	225.225	0	0	0	0	0.666667	0	0	0	0
novel_circ_000193	225.225	0	0	0	0	0.666667	0	0	0	0
novel_circ_000194	0	0	0	0	335.548	0	0	0	0	1.66667
novel_circ_000195	0	0	0	468.541	0	0	0	0	2.33333	0
novel_circ_000196	0	0	0	0	134.219	0	0	0	0	0.666667
novel_circ_000197	0	186.498	0	0	0	0	1	0	0	0
novel_circ_000198	1332.21	810.449	1939.08	1302.96	744.008	4	4	6.66667	7.33333	4
novel_circ_000199	0	0	0	0	236.616	0	0	0	0	1.33333
novel_circ_000200	0	0	445.752	0	0	0	0	1.66667	0	0
novel_circ_000201	0	0	0	293.066	0	0	0	0	1.66667	0
novel_circ_000202	0	218.245	0	758.007	336.327	0	1	0	4.33333	1.66667
novel_circ_000203	0	0	0	0	402.658	0	0	0	0	2
novel_circ_000204	0	445.744	0	350.093	0	0	2.33333	0	2	0
novel_circ_000205	0	0	0	0	185.418	0	0	0	0	1
novel_circ_000206	0	633.205	0	818.206	1037.09	0	3.33333	0	4.66667	5.33333
novel_circ_000207	0	256.361	0	0	0	0	1.33333	0	0	0
novel_circ_000208	0	394.16	0	232.867	362.88	0	2	0	1.33333	2
novel_circ_000209	210.504	0	0	0	0	0.666667	0	0	0	0
novel_circ_000210	210.504	0	0	0	0	0.666667	0	0	0	0
novel_circ_000211	450.45	1034.1	89.1504	366.736	0	1.33333	5.33333	0.333333	2	0
novel_circ_000212	0	62.1659	0	0	134.219	0	0.333333	0	0	0.666667
novel_circ_000213	0	0	0	231.281	0	0	0	0	1.33333	0
novel_circ_000214	0	0	0	133.869	0	0	0	0	0.666667	0
novel_circ_000215	0	256.361	0	0	0	0	1.33333	0	0	0
novel_circ_000216	1831.93	1484.06	1492.59	1867.33	1776.86	5.66667	7.33333	5.33333	10.3333	9
novel_circ_000217	315.756	0	0	0	0	1	0	0	0	0
novel_circ_000218	0	0	0	0	193.373	0	0	0	0	1
novel_circ_000219	321.632	0	355.675	0	59.1541	1	0	1.33333	0	0.333333
novel_circ_000220	0	64.0902	0	0	271.555	0	0.333333	0	0	1.33333
novel_circ_000221	0	384.541	0	0	0	0	2	0	0	0
novel_circ_000222	225.225	0	0	0	0	0.666667	0	0	0	0
novel_circ_000223	0	192.271	0	0	0	0	1	0	0	0
novel_circ_000224	0	506.949	0	885.933	489.144	0	2.66667	0	5	2.66667
novel_circ_000225	0	0	602.32	182.575	0	0	0	2	1	0
novel_circ_000226	0	62.1659	533.667	0	67.1096	0	0.333333	2	0	0.333333
novel_circ_000227	0	0	0	0	135.777	0	0	0	0	0.666667
novel_circ_000228	761.753	636.09	0	829.297	465.707	2.33333	3.33333	0	4.66667	2.33333
novel_circ_000229	675.676	0	0	0	0	2	0	0	0	0
novel_circ_000230	423.946	939.591	0	1253.89	244.572	1.33333	4.66667	0	6.66667	1.33333
novel_circ_000231	0	145.497	0	0	0	0	0.666667	0	0	0
novel_circ_000232	878.819	314.678	88.8415	464.147	335.548	2.66667	1.66667	0.333333	2.66667	1.66667
novel_circ_000233	0	0	0	173.461	67.1096	0	0	0	1	0.333333
novel_circ_000234	662.408	530.999	266.525	781.384	271.555	2	2.66667	1	4.33333	1.33333
novel_circ_000235	216.38	0	0	0	0	0.666667	0	0	0	0
novel_circ_000236	1181.28	645.712	0	1855.87	1711.65	3.66667	3.33333	0	10	9
novel_circ_000237	108.19	128.18	89.1504	117.226	319.637	0.333333	0.666667	0.333333	0.666667	1.66667
novel_circ_000238	0	0	178.301	0	0	0	0	0.666667	0	0
novel_circ_000239	0	310.829	0	0	0	0	1.66667	0	0	0
novel_circ_000240	318.694	186.498	579.848	0	0	1	1	2	0	0
novel_circ_000241	0	0	0	133.869	0	0	0	0	0.666667	0
novel_circ_000242	28722.9	38486.7	19823.7	36273	37279.4	88.3333	195.667	69	199.333	193
novel_circ_000243	1929.82	1258.12	912.432	818.634	1739.42	6	6.33333	3.33333	4.33333	9
novel_circ_000244	675.676	64.0902	0	0	0	2	0.333333	0	0	0
novel_circ_000245	0	0	0	0	337.885	0	0	0	0	1.66667
novel_circ_000246	0	0	0	0	203.666	0	0	0	0	1
novel_circ_000247	0	145.497	0	0	0	0	0.666667	0	0	0
novel_circ_000248	3340.78	62.1659	2342.17	58.6132	0	10.3333	0.333333	8	0.333333	0
novel_circ_000249	3124.37	609.521	266.525	407.12	1172.09	9.66667	3	1	2.33333	6
novel_circ_000250	337.838	0	0	133.869	0	1	0	0	0.666667	0
novel_circ_000251	216.38	0	0	0	0	0.666667	0	0	0	0
novel_circ_000252	0	0	0	117.226	0	0	0	0	0.666667	0
novel_circ_000253	0	252.512	88.8415	308.915	0	0	1.33333	0.333333	1.66667	0
novel_circ_000254	0	0	0	117.226	67.8887	0	0	0	0.666667	0.333333
novel_circ_000255	0	543.506	290.233	350.886	59.1541	0	2.66667	1	2	0.333333
novel_circ_000256	0	0	0	0	268.438	0	0	0	0	1.33333
novel_circ_000257	0	985.404	266.525	466.527	1364.68	0	5	1	2.66667	7
novel_circ_000258	0	0	89.1504	117.226	134.219	0	0	0.333333	0.666667	0.666667
novel_circ_000259	0	218.245	0	0	134.219	0	1	0	0	0.666667
novel_circ_000260	0	0	0	0	135.777	0	0	0	0	0.666667
novel_circ_000261	450.45	0	0	0	0	1.33333	0	0	0	0
novel_circ_000262	0	0	178.301	0	0	0	0	0.666667	0	0
novel_circ_000263	0	128.18	0	0	0	0	0.666667	0	0	0
novel_circ_000264	225.225	0	88.8415	174.254	572.943	0.666667	0	0.333333	1	3
novel_circ_000265	108.19	218.245	356.602	133.869	439.503	0.333333	1	1.33333	0.666667	2.33333
novel_circ_000266	1101.08	1214.83	1159.08	2109.74	2472.35	3.33333	6.33333	4	11.3333	13
novel_circ_000267	1608.16	394.16	1583.71	426.935	1125.92	5	2	5.33333	2.33333	6
novel_circ_000268	12429	31171.7	24299	24147.1	24853.7	38.3333	156	85	132.333	128
novel_circ_000269	0	0	0	434.463	0	0	0	0	2.33333	0
novel_circ_000270	964.896	197.08	1179.27	117.226	726.969	3	1	4.33333	0.666667	3.66667
novel_circ_000271	0	0	267.451	0	59.1541	0	0	1	0	0.333333
novel_circ_000272	0	0	444.208	0	0	0	0	1.66667	0	0
novel_circ_000273	0	0	0	117.226	0	0	0	0	0.666667	0
novel_circ_000274	0	145.497	0	0	0	0	0.666667	0	0	0
novel_circ_000275	216.38	62.1659	0	472.469	67.1096	0.666667	0.333333	0	2.66667	0.333333
novel_circ_000276	0	0	0	234.453	0	0	0	0	1.33333	0
novel_circ_000277	864.098	769.083	533.049	893.097	778.947	2.66667	4	2	4.66667	4
novel_circ_000278	0	0	0	0	271.555	0	0	0	0	1.33333
novel_circ_000279	0	218.245	0	0	0	0	1	0	0	0
novel_circ_000280	216.38	126.256	0	0	0	0.666667	0.666667	0	0	0
novel_circ_000281	0	0	0	0	201.329	0	0	0	0	1
novel_circ_000282	1526.47	1227.33	712.894	606.337	964.364	4.66667	6.33333	2.66667	3.33333	5
novel_circ_000283	220.803	248.663	0	0	311.681	0.666667	1.33333	0	0	1.66667
novel_circ_000284	0	145.497	0	0	0	0	0.666667	0	0	0
novel_circ_000285	0	186.498	0	0	0	0	1	0	0	0
novel_circ_000286	1608.22	394.16	889.033	0	650.695	5	2	3.33333	0	3.66667
novel_circ_000287	526.26	0	0	0	0	1.66667	0	0	0	0
novel_circ_000288	0	248.663	0	57.8202	0	0	1.33333	0	0.333333	0
novel_circ_000289	0	248.663	0	0	0	0	1.33333	0	0	0
novel_circ_000290	8026.25	7959.95	5579.8	5306.25	9002.98	24.3333	39.3333	18.6667	28.3333	46.6667
novel_circ_000291	0	62.1659	0	117.226	0	0	0.333333	0	0.666667	0
novel_circ_000292	210.504	0	0	0	0	0.666667	0	0	0	0
novel_circ_000293	0	0	0	0	134.219	0	0	0	0	0.666667
novel_circ_000294	1178.37	72.7484	88.8415	0	67.1096	3.66667	0.333333	0.333333	0	0.333333
novel_circ_000295	315.756	0	0	0	0	1	0	0	0	0
novel_circ_000296	0	0	447.728	0	0	0	0	1.33333	0	0
novel_circ_000297	0	145.497	89.1504	325.558	0	0	0.666667	0.333333	1.66667	0
novel_circ_000298	766.207	188.422	1140.13	258.623	118.308	2.33333	1	3.66667	1.33333	0.666667
novel_circ_000299	0	145.497	534.902	115.64	0	0	0.666667	2	0.666667	0
novel_circ_000300	0	0	88.8415	57.8202	236.616	0	0	0.333333	0.333333	1.33333
novel_circ_000301	0	320.451	0	0	201.329	0	1.66667	0	0	1
novel_circ_000302	1529.44	337.768	1874.87	1083.99	674.991	4.66667	1.66667	6.33333	5.66667	3.33333
novel_circ_000303	421.008	0	0	0	0	1.33333	0	0	0	0
novel_circ_000304	0	0	0	0	203.666	0	0	0	0	1
novel_circ_000305	0	0	0	0	134.219	0	0	0	0	0.666667
novel_circ_000306	432.76	0	0	117.226	0	1.33333	0	0	0.666667	0
novel_circ_000307	421.008	0	0	0	0	1.33333	0	0	0	0
novel_circ_000308	0	0	0	184.161	0	0	0	0	1	0
novel_circ_000309	0	0	0	117.226	67.1096	0	0	0	0.666667	0.333333
novel_circ_000310	0	256.361	0	0	67.1096	0	1.33333	0	0	0.333333
novel_circ_000311	0	0	356.602	0	0	0	0	1.33333	0	0
novel_circ_000312	947.269	0	0	0	0	3	0	0	0	0
novel_circ_000313	859.644	321.412	712.277	593.295	650.346	2.66667	1.66667	2.66667	3	3.33333
novel_circ_000314	0	0	290.233	0	0	0	0	1	0	0
novel_circ_000315	337.838	0	0	0	0	1	0	0	0	0
novel_circ_000316	432.76	0	0	0	0	1.33333	0	0	0	0
novel_circ_000317	0	0	0	0	135.777	0	0	0	0	0.666667
novel_circ_000318	217.865	353.16	223.864	133.869	59.1541	0.666667	1.66667	0.666667	0.666667	0.333333
novel_circ_000319	213.442	0	827.111	125.548	379.57	0.666667	0	2.66667	0.666667	2
novel_circ_000320	105.252	550.24	178.301	357.621	134.998	0.333333	2.66667	0.666667	2	0.666667
novel_circ_000321	0	218.245	0	0	134.219	0	1	0	0	0.666667
novel_circ_000322	540.95	0	0	58.6132	185.418	1.66667	0	0	0.333333	1
novel_circ_000323	0	509.239	0	58.6132	67.8887	0	2.33333	0	0.333333	0.333333
novel_circ_000324	0	0	0	435.256	0	0	0	0	2.33333	0
novel_circ_000325	0	200.929	0	289.101	202.108	0	1	0	1.66667	1
novel_circ_000326	0	0	0	231.281	0	0	0	0	1.33333	0
novel_circ_000327	210.504	0	88.8415	0	0	0.666667	0	0.333333	0	0
novel_circ_000328	0	0	0	0	236.616	0	0	0	0	1.33333
novel_circ_000329	0	145.497	0	0	0	0	0.666667	0	0	0
novel_circ_000330	0	0	0	325.558	0	0	0	0	1.66667	0
novel_circ_000331	0	0	0	462.561	404.216	0	0	0	2.66667	2
novel_circ_000332	0	0	0	0	236.616	0	0	0	0	1.33333
novel_circ_000333	0	186.498	0	0	0	0	1	0	0	0
novel_circ_000334	225.225	353.16	0	0	0	0.666667	1.66667	0	0	0
novel_circ_000335	0	483.264	0	251.095	0	0	2.33333	0	1.33333	0
novel_circ_000336	330.477	0	355.366	0	0	1	0	1.33333	0	0
novel_circ_000337	0	0	0	0	295.77	0	0	0	0	1.66667
novel_circ_000338	0	401.858	89.1504	925.953	532.038	0	2	0.333333	5	2.66667
novel_circ_000339	0	0	111.932	308.122	0	0	0	0.333333	1.66667	0
novel_circ_000340	0	0	178.301	0	0	0	0	0.666667	0	0
novel_circ_000341	1397.69	1185.37	1292.43	901.783	833.426	4.33333	6	4.66667	5	4.33333
novel_circ_000342	0	0	89.1504	0	303.726	0	0	0.333333	0	1.66667
novel_circ_000343	225.225	0	0	0	0	0.666667	0	0	0	0
novel_circ_000344	1508.82	723.27	981.086	616.245	1155.4	4.66667	3.66667	3.33333	3.33333	6
novel_circ_000345	1073.12	1306.81	4062.15	985.359	1746.59	3.33333	6.66667	13.6667	5.33333	9
novel_circ_000346	12465.9	12460.3	18088.6	11422.3	13526.2	38.3333	63	62.6667	62	69.3333
novel_circ_000347	13960	14090.8	20409.3	12166.5	16247	43	71	70.6667	66	83.6667
novel_circ_000348	0	0	0	0	402.658	0	0	0	0	2
novel_circ_000349	0	0	0	0	671.096	0	0	0	0	3.33333
novel_circ_000350	1728.16	513.683	2233.76	290.687	797.195	5.33333	2.66667	7.33333	1.66667	4
novel_circ_000351	662.408	0	735.058	58.6132	67.8887	2	0	2.66667	0.333333	0.333333
novel_circ_000352	0	0	178.301	0	0	0	0	0.666667	0	0
novel_circ_000353	5628.32	5697.42	5664.07	7363.58	7682.64	17	28.6667	19.6667	40.6667	40
novel_circ_000354	210.504	0	0	0	0	0.666667	0	0	0	0
novel_circ_000355	217.865	0	223.864	0	118.308	0.666667	0	0.666667	0	0.666667
novel_circ_000356	3874.34	5272.84	2650	4845.95	4564.62	12	26.3333	9.66667	26.6667	23.6667
novel_circ_000357	533.621	136.839	378.765	0	202.887	1.66667	0.666667	1.33333	0	1
novel_circ_000358	446.028	64.0902	335.796	117.226	59.1541	1.33333	0.333333	1	0.666667	0.333333
novel_circ_000359	2506.15	1559.33	691.471	1281.2	1207.81	7.66667	8	2.33333	7	6
novel_circ_000360	2055.7	1431.15	803.403	1281.2	1207.81	6.33333	7.33333	2.66667	7	6
novel_circ_000361	752.939	1123.2	1295.03	1352.1	539.214	2.33333	5.66667	4.33333	7.33333	2.66667
novel_circ_000362	0	248.663	0	0	0	0	1.33333	0	0	0
novel_circ_000363	0	0	89.1504	125.548	606.324	0	0	0.333333	0.666667	3
novel_circ_000364	0	128.18	0	0	0	0	0.666667	0	0	0
novel_circ_000365	0	290.994	0	0	0	0	1.33333	0	0	0
novel_circ_000366	108.19	128.18	177.992	0	202.887	0.333333	0.666667	0.666667	0	1
novel_circ_000367	0	5778.46	0	6015.84	5777.62	0	29.3333	0	33.3333	30
novel_circ_000368	0	265.019	0	175.047	134.219	0	1.33333	0	1	0.666667
novel_circ_000369	546.857	64.0902	0	709.729	524.861	1.66667	0.333333	0	3.66667	2.66667
novel_circ_000370	0	145.497	0	0	0	0	0.666667	0	0	0
novel_circ_000371	0	186.498	0	0	0	0	1	0	0	0
novel_circ_000372	0	0	0	0	134.219	0	0	0	0	0.666667
novel_circ_000373	2365.55	5146.58	1692.74	4250.74	1735.01	7.33333	25.6667	6	23	8.66667
novel_circ_000374	647.687	680.345	935.214	492.283	514.568	2	3.33333	3.33333	2.66667	2.66667
novel_circ_000375	0	145.497	0	0	0	0	0.666667	0	0	0
novel_circ_000376	0	0	0	0	135.777	0	0	0	0	0.666667
novel_circ_000377	423.946	510.798	0	1365.93	692.81	1.33333	2.66667	0	7.66667	3.66667
novel_circ_000378	0	192.271	0	0	0	0	1	0	0	0
novel_circ_000379	0	192.271	0	0	0	0	1	0	0	0
novel_circ_000380	0	363.742	0	0	0	0	1.66667	0	0	0
novel_circ_000381	0	363.742	0	0	0	0	1.66667	0	0	0
novel_circ_000382	0	0	223.864	0	0	0	0	0.666667	0	0
novel_circ_000383	337.838	0	0	0	0	1	0	0	0	0
novel_circ_000384	0	0	0	0	271.555	0	0	0	0	1.33333
novel_circ_000385	0	0	0	0	203.666	0	0	0	0	1
novel_circ_000386	108.19	256.361	0	701.408	978.288	0.333333	1.33333	0	3.66667	5.33333
novel_circ_000387	3359.89	192.271	1603.9	433.67	268.438	10.3333	1	5.66667	2.33333	1.33333
novel_circ_000388	0	192.271	0	0	67.1096	0	1	0	0	0.333333
novel_circ_000389	323.117	0	0	231.281	118.308	1	0	0	1.33333	0.666667
novel_circ_000390	0	372.995	0	0	0	0	2	0	0	0
novel_circ_000391	0	0	0	117.226	134.219	0	0	0	0.666667	0.666667
novel_circ_000392	105.252	250.588	799.574	232.074	270.776	0.333333	1.33333	3	1.33333	1.33333
novel_circ_000393	324.57	209.587	88.8415	291.48	456.193	1	1	0.333333	1.66667	2.33333
novel_circ_000394	0	355.084	0	326.351	968.425	0	1.66667	0	1.66667	5
novel_circ_000395	0	124.332	0	0	0	0	0.666667	0	0	0
novel_circ_000396	0	0	201.082	0	194.931	0	0	0.666667	0	1
novel_circ_000397	0	124.332	88.8415	0	0	0	0.666667	0.333333	0	0
novel_circ_000398	0	0	0	0	271.555	0	0	0	0	1.33333
novel_circ_000399	105.252	0	267.142	58.6132	0	0.333333	0	1	0.333333	0
novel_circ_000400	108.19	335.843	0	184.161	725.411	0.333333	1.66667	0	1	3.66667
novel_circ_000401	0	0	0	58.6132	311.681	0	0	0	0.333333	1.66667
novel_circ_000402	337.838	0	0	0	0	1	0	0	0	0
novel_circ_000403	112.613	209.587	0	0	252.527	0.333333	1	0	0	1.33333
novel_circ_000404	0	0	0	240.395	0	0	0	0	1.33333	0
novel_circ_000405	0	346.426	0	466.527	469.767	0	1.66667	0	2.66667	2.33333
novel_circ_000406	887.633	0	355.366	326.351	201.329	2.66667	0	1.33333	1.66667	1
novel_circ_000407	0	0	0	0	268.438	0	0	0	0	1.33333
novel_circ_000408	0	145.497	0	347.714	0	0	0.666667	0	2	0
novel_circ_000409	0	0	0	117.226	0	0	0	0	0.666667	0
novel_circ_000410	0	0	0	0	177.462	0	0	0	0	1
novel_circ_000411	0	0	89.1504	133.869	177.462	0	0	0.333333	0.666667	1
novel_circ_000412	0	0	267.451	0	0	0	0	1	0	0
novel_circ_000413	108.19	200.929	88.8415	124.755	252.527	0.333333	1	0.333333	0.666667	1.33333
novel_circ_000414	217.865	145.497	0	0	0	0.666667	0.666667	0	0	0
novel_circ_000415	0	192.271	0	0	67.1096	0	1	0	0	0.333333
novel_circ_000416	0	188.422	177.683	349.3	379.57	0	1	0.666667	2	2
novel_circ_000417	0	192.271	0	0	134.219	0	1	0	0	0.666667
novel_circ_000418	0	0	0	0	118.308	0	0	0	0	0.666667
novel_circ_000419	0	0	0	0	135.777	0	0	0	0	0.666667
novel_circ_000420	0	218.245	0	0	0	0	1	0	0	0
novel_circ_000421	0	218.245	0	0	0	0	1	0	0	0
novel_circ_000422	0	0	0	0	381.128	0	0	0	0	2
novel_circ_000423	675.676	0	0	175.84	0	2	0	0	1	0
novel_circ_000424	0	0	0	0	354.925	0	0	0	0	2
novel_circ_000425	893.54	374.92	0	374.264	260.483	2.66667	2	0	2	1.33333
novel_circ_000426	0	0	0	117.226	0	0	0	0	0.666667	0
novel_circ_000427	0	335.843	0	608.717	648.788	0	1.66667	0	3.33333	3.33333
novel_circ_000428	0	0	0	117.226	0	0	0	0	0.666667	0
novel_circ_000429	563.063	0	0	0	0	1.66667	0	0	0	0
novel_circ_000430	0	0	0	293.066	0	0	0	0	1.66667	0
novel_circ_000431	0	0	0	293.066	311.681	0	0	0	1.66667	1.66667
novel_circ_000432	0	0	0	173.461	0	0	0	0	1	0
novel_circ_000433	0	256.361	0	0	0	0	1.33333	0	0	0
novel_circ_000434	0	0	0	133.869	0	0	0	0	0.666667	0
novel_circ_000435	0	0	0	115.64	0	0	0	0	0.666667	0
novel_circ_000436	210.504	0	0	0	59.1541	0.666667	0	0	0	0.333333
novel_circ_000437	0	0	0	133.869	0	0	0	0	0.666667	0
novel_circ_000438	216.38	526.19	1361.09	393.285	398.597	0.666667	2.66667	4.66667	2	2
novel_circ_000439	529.198	188.422	979.419	531.082	574.502	1.66667	1	3.66667	3	3
novel_circ_000440	108.19	806.601	2096.14	664.158	271.555	0.333333	4	7.33333	3.66667	1.33333
novel_circ_000441	529.198	248.663	846.99	349.3	362.88	1.66667	1.33333	3	2	2
novel_circ_000442	108.19	526.19	1449.93	393.285	457.752	0.333333	2.66667	5	2	2.33333
novel_circ_000443	321.632	312.754	177.992	66.9344	461.812	1	1.66667	0.666667	0.333333	2.33333
novel_circ_000444	423.946	1294.67	312.705	463.354	202.887	1.33333	6.33333	1	2.66667	1
novel_circ_000445	426.884	1404.57	757.222	782.97	543.109	1.33333	7	2.66667	4.33333	2.66667
novel_circ_000446	0	0	0	0	295.77	0	0	0	0	1.66667
novel_circ_000447	0	456.326	313.014	191.689	524.082	0	2.33333	1	1	2.66667
novel_circ_000448	532.136	1159.39	735.058	1560.79	1578.21	1.66667	6	2.66667	8.66667	8.33333
novel_circ_000449	328.993	735.777	913.359	1301.01	1667.12	1	3.66667	3.33333	7	8.33333
novel_circ_000450	0	0	0	173.461	0	0	0	0	1	0
novel_circ_000451	631.512	0	0	115.64	0	2	0	0	0.666667	0
novel_circ_000452	0	0	0	117.226	0	0	0	0	0.666667	0
novel_circ_000453	0	0	178.301	0	328.372	0	0	0.666667	0	1.66667
novel_circ_000454	0	0	513.479	0	0	0	0	1.66667	0	0
novel_circ_000455	1172.46	633.571	1715.83	529.496	1832.3	3.66667	3	6	3	9.66667
novel_circ_000456	1087.84	64.0902	533.049	499.018	709.5	3.33333	0.333333	2	2.66667	3.66667
novel_circ_000457	210.504	128.18	0	0	177.462	0.666667	0.666667	0	0	1
novel_circ_000458	0	273.677	0	0	118.308	0	1.33333	0	0	0.666667
novel_circ_000459	542.435	0	88.8415	117.226	542.33	1.66667	0	0.333333	0.666667	2.66667
novel_circ_000460	112.613	248.663	0	0	0	0.333333	1.33333	0	0	0
novel_circ_000461	0	0	0	133.869	0	0	0	0	0.666667	0
novel_circ_000462	0	0	0	0	203.666	0	0	0	0	1
novel_circ_000463	0	0	0	117.226	0	0	0	0	0.666667	0
novel_circ_000464	450.45	0	178.301	0	0	1.33333	0	0.666667	0	0
novel_circ_000465	0	0	0	133.869	0	0	0	0	0.666667	0
novel_circ_000466	0	363.742	0	0	0	0	1.66667	0	0	0
novel_circ_000467	0	128.18	0	0	0	0	0.666667	0	0	0
novel_circ_000468	0	128.18	0	0	201.329	0	0.666667	0	0	1
novel_circ_000469	0	0	0	0	236.616	0	0	0	0	1.33333
novel_circ_000470	0	128.18	0	0	0	0	0.666667	0	0	0
novel_circ_000471	0	0	0	175.84	236.616	0	0	0	1	1.33333
novel_circ_000472	0	124.332	0	0	0	0	0.666667	0	0	0
novel_circ_000473	0	0	355.366	0	0	0	0	1.33333	0	0
novel_circ_000474	0	200.929	0	173.461	339.443	0	1	0	1	1.66667
novel_circ_000475	0	0	0	0	134.219	0	0	0	0	0.666667
novel_circ_000476	0	0	0	58.6132	177.462	0	0	0	0.333333	1
novel_circ_000477	0	0	0	0	203.666	0	0	0	0	1
novel_circ_000478	0	0	0	334.672	0	0	0	0	1.66667	0
novel_circ_000479	210.504	0	0	0	0	0.666667	0	0	0	0
novel_circ_000480	0	197.08	0	117.226	67.1096	0	1	0	0.666667	0.333333
novel_circ_000481	326.055	394.16	0	125.548	67.1096	1	2	0	0.666667	0.333333
novel_circ_000482	0	0	0	117.226	0	0	0	0	0.666667	0
novel_circ_000483	0	0	0	115.64	134.219	0	0	0	0.666667	0.666667
novel_circ_000484	431.307	188.422	1424.86	124.755	134.998	1.33333	1	5.33333	0.666667	0.666667
novel_circ_000485	641.811	333.919	1605.14	191.689	67.8887	2	1.66667	5.66667	1	0.333333
novel_circ_000486	4340.96	2173.06	2965.92	2120.8	3246.62	13.3333	10.6667	10.3333	11.6667	17
novel_circ_000487	337.838	0	0	0	0	1	0	0	0	0
novel_circ_000488	108.19	128.18	0	0	0	0.333333	0.666667	0	0	0
novel_circ_000489	631.512	0	0	0	0	2	0	0	0	0
novel_circ_000490	0	0	267.451	0	0	0	0	1	0	0
novel_circ_000491	0	290.994	0	0	0	0	1.33333	0	0	0
novel_circ_000492	529.198	331.994	1759.42	58.6132	607.103	1.66667	1.66667	6.33333	0.333333	3
novel_circ_000493	0	0	0	115.64	0	0	0	0	0.666667	0
novel_circ_000494	337.838	0	0	0	0	1	0	0	0	0
novel_circ_000495	0	2135.55	0	66.9344	605.544	0	10.6667	0	0.333333	3
novel_circ_000496	0	0	0	0	177.462	0	0	0	0	1
novel_circ_000497	0	0	0	351.679	236.616	0	0	0	2	1.33333
novel_circ_000498	535.074	192.271	890.577	66.9344	269.997	1.66667	1	3.33333	0.333333	1.33333
novel_circ_000499	540.95	0	0	133.869	0	1.66667	0	0	0.666667	0
novel_circ_000500	0	72.7484	178.301	0	0	0	0.333333	0.666667	0	0
novel_circ_000501	0	256.361	0	0	0	0	1.33333	0	0	0
novel_circ_000502	108.19	0	444.825	0	0	0.333333	0	1.66667	0	0
novel_circ_000503	315.756	0	0	0	0	1	0	0	0	0
novel_circ_000504	5068.91	4538.62	4368.12	3525.96	4719.16	15.6667	23	15.3333	19.3333	24.6667
novel_circ_000505	1419.74	136.839	533.049	617.038	1486.89	4.33333	0.666667	2	3.33333	7.66667
novel_circ_000506	337.838	0	0	133.869	329.93	1	0	0	0.666667	1.66667
novel_circ_000507	0	0	0	233.66	0	0	0	0	1.33333	0
novel_circ_000508	0	0	0	0	407.332	0	0	0	0	2
novel_circ_000509	0	0	0	0	236.616	0	0	0	0	1.33333
novel_circ_000510	337.838	0	0	0	0	1	0	0	0	0
novel_circ_000511	315.756	72.7484	0	184.161	135.777	1	0.333333	0	1	0.666667
novel_circ_000512	0	250.588	0	492.283	658.651	0	1.33333	0	2.66667	3.66667
novel_circ_000513	0	0	0	0	271.555	0	0	0	0	1.33333
novel_circ_000514	0	0	0	231.281	0	0	0	0	1.33333	0
novel_circ_000515	0	329.109	88.8415	300.594	201.329	0	1.66667	0.333333	1.66667	1
novel_circ_000516	0	0	0	0	118.308	0	0	0	0	0.666667
novel_circ_000517	1873.19	460.175	3721.9	472.469	584.015	5.66667	2.33333	13	2.66667	3
novel_circ_000518	2308.89	823.917	2740.51	368.322	693.589	7	4	9.66667	2	3.66667
novel_circ_000519	108.19	265.019	0	463.354	203.666	0.333333	1.33333	0	2.66667	1
novel_circ_000520	0	128.18	0	0	0	0	0.666667	0	0	0
novel_circ_000521	0	248.663	0	0	0	0	1.33333	0	0	0
novel_circ_000522	0	0	0	117.226	0	0	0	0	0.666667	0
novel_circ_000523	0	0	355.984	0	0	0	0	1.33333	0	0
novel_circ_000524	0	124.332	0	0	0	0	0.666667	0	0	0
novel_circ_000525	991.432	500.581	1691.82	451.105	663.919	3	2.33333	6	2.33333	3.33333
novel_circ_000526	2570.15	342.577	1672.87	358.414	1230.47	8	1.66667	5.66667	2	6.33333
novel_circ_000527	1221.05	0	401.547	0	0	3.66667	0	1.33333	0	0
novel_circ_000528	318.694	0	646.834	0	437.945	1	0	2.33333	0	2.33333
novel_circ_000529	210.504	0	557.684	0	505.055	0.666667	0	2	0	2.66667
novel_circ_000530	0	0	0	133.869	0	0	0	0	0.666667	0
novel_circ_000531	0	0	0	0	118.308	0	0	0	0	0.666667
novel_circ_000532	108.19	0	1005.1	200.803	268.438	0.333333	0	3.33333	1	1.33333
novel_circ_000533	0	404.743	0	299.008	0	0	2	0	1.66667	0
novel_circ_000534	220.803	256.361	0	0	245.351	0.666667	1.33333	0	0	1.33333
novel_circ_000535	3298.8	0	1228.35	58.6132	245.351	10	0	4	0.333333	1.33333
novel_circ_000536	0	0	0	117.226	0	0	0	0	0.666667	0
novel_circ_000537	0	64.0902	335.796	0	67.1096	0	0.333333	1	0	0.333333
novel_circ_000538	0	0	0	0	135.777	0	0	0	0	0.666667
novel_circ_000539	0	0	0	462.561	402.658	0	0	0	2.66667	2
novel_circ_000540	540.981	0	579.539	58.6132	135.777	1.66667	0	2	0.333333	0.666667
novel_circ_000541	543.919	145.497	200.773	133.869	134.219	1.66667	0.666667	0.666667	0.666667	0.666667
novel_circ_000542	108.19	0	223.864	251.095	0	0.333333	0	0.666667	1.33333	0
novel_circ_000543	112.613	263.095	780.621	643.159	607.452	0.333333	1.33333	2.66667	3.66667	3.33333
novel_circ_000544	0	62.1659	626.029	200.803	0	0	0.333333	2	1	0
novel_circ_000545	0	0	0	0	203.666	0	0	0	0	1
novel_circ_000546	315.756	0	290.233	0	313.24	1	0	1	0	1.66667
novel_circ_000547	0	126.256	0	241.188	429.99	0	0.666667	0	1.33333	2.33333
novel_circ_000548	0	256.361	313.014	57.8202	394.702	0	1.33333	1	0.333333	2
novel_circ_000549	0	0	0	231.281	0	0	0	0	1.33333	0
novel_circ_000550	0	0	0	173.461	0	0	0	0	1	0
novel_circ_000551	0	136.839	0	0	135.777	0	0.666667	0	0	0.666667
novel_circ_000552	210.504	0	266.525	117.226	67.1096	0.666667	0	1	0.666667	0.333333
novel_circ_000553	0	0	0	133.869	0	0	0	0	0.666667	0
novel_circ_000554	210.504	0	0	466.527	0	0.666667	0	0	2.66667	0
novel_circ_000555	0	0	335.796	117.226	0	0	0	1	0.666667	0
novel_circ_000556	0	0	0	0	135.777	0	0	0	0	0.666667
novel_circ_000557	540.981	64.0902	1715.53	460.22	67.1096	1.66667	0.333333	6	2.33333	0.333333
novel_circ_000558	0	0	0	173.461	0	0	0	0	1	0
novel_circ_000559	0	0	0	0	236.616	0	0	0	0	1.33333
novel_circ_000560	0	0	0	175.84	0	0	0	0	1	0
novel_circ_000561	105.252	0	0	467.32	134.219	0.333333	0	0	2.66667	0.666667
novel_circ_000562	0	72.7484	177.992	133.869	0	0	0.333333	0.666667	0.666667	0
novel_circ_000563	0	0	0	0	134.219	0	0	0	0	0.666667
novel_circ_000564	105.252	0	444.208	0	0	0.333333	0	1.66667	0	0
novel_circ_000565	0	218.245	0	0	0	0	1	0	0	0
novel_circ_000566	0	0	1471.35	200.803	0	0	0	5.33333	1	0
novel_circ_000567	0	256.361	0	0	0	0	1.33333	0	0	0
novel_circ_000568	0	0	0	0	236.616	0	0	0	0	1.33333
novel_circ_000569	563.063	72.7484	621.891	57.8202	59.1541	1.66667	0.333333	2.33333	0.333333	0.333333
novel_circ_000570	225.225	192.271	89.1504	493.869	0	0.666667	1	0.333333	2.66667	0
novel_circ_000571	0	128.18	0	0	271.555	0	0.666667	0	0	1.33333
novel_circ_000572	0	565.266	0	58.6132	67.1096	0	3	0	0.333333	0.333333
novel_circ_000573	0	0	0	267.738	0	0	0	0	1.33333	0
novel_circ_000574	216.38	0	0	0	0	0.666667	0	0	0	0
novel_circ_000575	0	0	178.301	0	0	0	0	0.666667	0	0
novel_circ_000576	0	72.7484	89.1504	133.869	0	0	0.333333	0.333333	0.666667	0
novel_circ_000577	0	0	895.456	0	0	0	0	2.66667	0	0
novel_circ_000578	0	0	111.932	175.84	0	0	0	0.333333	1	0
novel_circ_000579	0	0	0	133.869	0	0	0	0	0.666667	0
novel_circ_000580	0	0	0	0	134.219	0	0	0	0	0.666667
novel_circ_000581	1695.78	363.742	3730.61	442.784	201.329	5.33333	1.66667	12	2.33333	1
novel_circ_000582	0	0	267.451	0	0	0	0	1	0	0
novel_circ_000583	0	446.707	266.525	1009.89	775.83	0	2.33333	1	5.66667	4
novel_circ_000584	216.38	0	0	0	0	0.666667	0	0	0	0
novel_circ_000585	646.234	218.245	711.35	0	67.1096	2	1	2.66667	0	0.333333
novel_circ_000586	0	0	0	133.869	0	0	0	0	0.666667	0
novel_circ_000587	0	145.497	0	0	0	0	0.666667	0	0	0
novel_circ_000588	563.063	0	0	0	0	1.66667	0	0	0	0
novel_circ_000589	0	0	580.465	0	0	0	0	2	0	0
novel_circ_000590	0	0	267.451	0	313.24	0	0	1	0	1.66667
novel_circ_000591	0	0	0	0	201.329	0	0	0	0	1
novel_circ_000592	1418.28	399.933	711.041	598.809	473.233	4.33333	2	2.66667	3.33333	2.66667
novel_circ_000593	0	374.92	780.93	0	177.462	0	2	2.66667	0	1
novel_circ_000594	0	0	0	234.453	0	0	0	0	1.33333	0
novel_circ_000595	0	0	0	502.19	0	0	0	0	2.66667	0
novel_circ_000596	0	0	0	0	135.777	0	0	0	0	0.666667
novel_circ_000597	0	0	0	234.453	0	0	0	0	1.33333	0
novel_circ_000598	421.008	0	0	0	0	1.33333	0	0	0	0
novel_circ_000599	869.942	383.578	444.825	192.482	320.416	2.66667	2	1.66667	1	1.66667
novel_circ_000600	337.838	0	177.683	115.64	0	1	0	0.666667	0.666667	0
novel_circ_000601	0	124.332	0	58.6132	134.219	0	0.666667	0	0.333333	0.666667
novel_circ_000602	105.252	64.0902	88.8415	234.453	201.329	0.333333	0.333333	0.333333	1.33333	1
novel_circ_000603	675.676	0	0	0	0	2	0	0	0	0
novel_circ_000604	0	0	0	0	271.555	0	0	0	0	1.33333
novel_circ_000605	0	186.498	0	0	0	0	1	0	0	0
novel_circ_000606	0	145.497	0	0	0	0	0.666667	0	0	0
novel_circ_000607	112.613	192.271	980.037	0	67.8887	0.333333	1	3.66667	0	0.333333
novel_circ_000608	0	124.332	0	200.803	0	0	0.666667	0	1	0
novel_circ_000609	0	0	0	0	135.777	0	0	0	0	0.666667
novel_circ_000610	0	290.994	0	0	0	0	1.33333	0	0	0
novel_circ_000611	333.415	1310.66	559.66	875.661	844.498	1	6.66667	1.66667	4.66667	4.33333
novel_circ_000612	0	0	0	408.706	0	0	0	0	2.33333	0
novel_circ_000613	0	0	0	0	335.548	0	0	0	0	1.66667
novel_circ_000614	0	0	0	200.803	59.1541	0	0	0	1	0.333333
novel_circ_000615	0	0	177.683	0	0	0	0	0.666667	0	0
novel_circ_000616	0	0	0	0	134.219	0	0	0	0	0.666667
novel_circ_000617	0	499.251	0	133.869	67.8887	0	2.66667	0	0.666667	0.333333
novel_circ_000618	0	186.498	356.293	66.9344	134.219	0	1	1.33333	0.333333	0.666667
novel_circ_000619	0	124.332	0	0	0	0	0.666667	0	0	0
novel_circ_000620	0	248.663	0	0	0	0	1.33333	0	0	0
novel_circ_000621	0	0	0	0	177.462	0	0	0	0	1
novel_circ_000622	0	0	0	0	543.109	0	0	0	0	2.66667
novel_circ_000623	0	0	0	0	118.308	0	0	0	0	0.666667
novel_circ_000624	0	0	0	173.461	0	0	0	0	1	0
novel_circ_000625	0	0	0	0	354.925	0	0	0	0	2
novel_circ_000626	324.57	0	0	0	0	1	0	0	0	0
novel_circ_000627	0	248.663	0	0	0	0	1.33333	0	0	0
novel_circ_000628	540.981	72.7484	958.613	57.8202	134.998	1.66667	0.333333	3.33333	0.333333	0.666667
novel_circ_000629	0	0	0	0	354.925	0	0	0	0	2
novel_circ_000630	529.198	62.1659	980.037	57.8202	862.746	1.66667	0.333333	3.66667	0.333333	4.33333
novel_circ_000631	1606.71	532.923	668.38	675.651	1037.09	5	2.66667	2.33333	3.66667	5.33333
novel_circ_000632	5068.88	4376.77	7407.32	4144.58	3878.21	15.6667	22.3333	25.6667	22.6667	20
novel_circ_000633	0	0	177.683	0	0	0	0	0.666667	0	0
novel_circ_000634	0	372.995	0	0	0	0	2	0	0	0
novel_circ_000635	0	0	0	200.803	193.373	0	0	0	1	1
novel_circ_000636	0	72.7484	88.8415	234.453	0	0	0.333333	0.333333	1.33333	0
novel_circ_000637	0	0	0	0	177.462	0	0	0	0	1
novel_circ_000638	0	0	0	289.101	0	0	0	0	1.66667	0
novel_circ_000639	0	0	0	234.453	0	0	0	0	1.33333	0
novel_circ_000640	675.676	0	0	58.6132	0	2	0	0	0.333333	0
novel_circ_000641	3375.43	11998.2	2132.2	13297.2	4539.03	10.6667	63.3333	8	76	22.3333
novel_circ_000642	5067.57	62.1659	0	2216.67	0	15	0.333333	0	12	0
novel_circ_000643	121312	248839	104295	230841	192436	375.333	1259.33	370.667	1274	997.667
novel_circ_000644	3115.55	3847.7	2162.51	3377.46	3429.19	9.66667	19.6667	7.66667	18.3333	17.6667
novel_circ_000645	0	0	0	0	407.332	0	0	0	0	2
novel_circ_000646	0	209.587	0	0	0	0	1	0	0	0
novel_circ_000647	220.803	186.498	88.8415	0	134.998	0.666667	1	0.333333	0	0.666667
novel_circ_000648	0	363.742	0	0	0	0	1.66667	0	0	0
novel_circ_000649	0	0	0	117.226	0	0	0	0	0.666667	0
novel_circ_000650	432.76	64.0902	0	200.803	254.086	1.33333	0.333333	0	1	1.33333
novel_circ_000651	6851.51	1739.46	3699	2487.97	3736.81	21	8.66667	13.3333	13.3333	19.3333
novel_circ_000652	0	62.1659	355.984	0	0	0	0.333333	1.33333	0	0
novel_circ_000653	1009.09	417.25	3126.93	133.869	457.752	3	2	10.3333	0.666667	2.33333
novel_circ_000654	0	0	177.683	0	0	0	0	0.666667	0	0
novel_circ_000655	2418.56	3679.11	734.131	4022.13	1869.74	7.33333	19	2.66667	22.6667	9.66667
novel_circ_000656	438.667	1044.68	378.456	466.527	1031.04	1.33333	5.33333	1.33333	2.66667	5.66667
novel_circ_000657	0	0	0	0	134.219	0	0	0	0	0.666667
novel_circ_000658	0	0	266.525	58.6132	407.332	0	0	1	0.333333	2
novel_circ_000659	112.613	0	266.525	58.6132	59.1541	0.333333	0	1	0.333333	0.333333
novel_circ_000660	984.04	2144.8	915.952	2850.31	3148.12	3	11	3	15.6667	16.3333
novel_circ_000661	1560.37	273.677	849.584	308.122	135.777	4.66667	1.33333	2.66667	1.66667	0.666667
novel_circ_000662	0	134.914	0	234.453	67.8887	0	0.666667	0	1.33333	0.333333
novel_circ_000663	0	363.742	0	0	0	0	1.66667	0	0	0
novel_circ_000664	112.613	72.7484	534.902	464.147	59.1541	0.333333	0.333333	2	2.66667	0.333333
novel_circ_000665	0	0	177.683	0	0	0	0	0.666667	0	0
novel_circ_000666	105.252	346.426	401.856	117.226	0	0.333333	1.66667	1.33333	0.666667	0
novel_circ_000667	0	1052.74	0	1050.71	591.971	0	5	0	5.66667	3
novel_circ_000668	108.19	145.497	557.066	66.9344	0	0.333333	0.666667	2	0.333333	0
novel_circ_000669	978.164	72.7484	3037.16	529.496	134.998	3	0.333333	10	3	0.666667
novel_circ_000670	450.45	136.839	266.833	57.8202	135.777	1.33333	0.666667	1	0.333333	0.666667
novel_circ_000671	1121.7	0	0	0	0	3.33333	0	0	0	0
novel_circ_000672	0	0	0	133.869	0	0	0	0	0.666667	0
novel_circ_000673	434.245	1172.86	912.741	1229.29	1746.16	1.33333	6	3.33333	7	9.33333
novel_circ_000674	1397.69	2680.97	1047.76	4754.09	4294.44	4.33333	13.3333	3.66667	26	22
novel_circ_000675	0	0	0	527.154	0	0	0	0	2.66667	0
novel_circ_000676	1087.84	280.411	556.757	58.6132	261.262	3.33333	1.33333	2	0.333333	1.33333
novel_circ_000677	0	0	0	115.64	0	0	0	0	0.666667	0
novel_circ_000678	216.38	124.332	0	417.028	1367.37	0.666667	0.666667	0	2.33333	7.33333
novel_circ_000679	216.38	0	0	0	0	0.666667	0	0	0	0
novel_circ_000680	675.676	0	0	0	0	2	0	0	0	0
novel_circ_000681	5704.19	1922.47	6940.89	1373.89	922.679	17.3333	9.33333	23.3333	7.33333	4.66667
novel_circ_000682	3371.74	1145.33	3151.38	443.577	648.008	10.3333	5.66667	10	2.33333	3.33333
novel_circ_000683	0	145.497	0	0	0	0	0.666667	0	0	0
novel_circ_000684	540.95	64.0902	355.675	183.368	574.502	1.66667	0.333333	1.33333	1	3
novel_circ_000685	2495.86	2435.19	3321.9	2338.25	1618.77	7.66667	12	11.6667	12.6667	8.33333
novel_circ_000686	321.632	1125.13	1874.26	768.707	1397.64	1	5.66667	6.33333	4.33333	7.33333
novel_circ_000687	112.613	536.772	267.451	0	0	0.333333	2.66667	1	0	0
novel_circ_000688	540.95	64.0902	447.728	451.105	321.195	1.66667	0.333333	1.33333	2.33333	1.66667
novel_circ_000689	333.415	380.693	0	66.9344	201.329	1	2	0	0.333333	1
novel_circ_000690	0	218.245	0	0	0	0	1	0	0	0
novel_circ_000691	0	0	177.683	0	0	0	0	0.666667	0	0
novel_circ_000692	0	0	0	200.803	67.1096	0	0	0	1	0.333333
novel_circ_000693	0	192.271	0	0	0	0	1	0	0	0
novel_circ_000694	450.45	0	89.1504	66.9344	135.777	1.33333	0	0.333333	0.333333	0.666667
novel_circ_000695	0	0	0	0	270.776	0	0	0	0	1.33333
novel_circ_000696	108.19	145.497	89.1504	0	0	0.333333	0.666667	0.333333	0	0
novel_circ_000697	225.225	62.1659	200.773	191.689	127.043	0.666667	0.333333	0.666667	1	0.666667
novel_circ_000698	0	290.994	88.8415	0	236.616	0	1.33333	0.333333	0	1.33333
novel_circ_000699	210.504	609.521	0	350.093	202.108	0.666667	3	0	2	1
novel_circ_000700	0	0	0	133.869	0	0	0	0	0.666667	0
novel_circ_000701	0	310.829	0	0	0	0	1.66667	0	0	0
novel_circ_000702	0	248.663	0	0	0	0	1.33333	0	0	0
novel_circ_000703	0	290.994	0	0	0	0	1.33333	0	0	0
novel_circ_000704	0	0	0	0	177.462	0	0	0	0	1
novel_circ_000705	0	0	445.752	0	0	0	0	1.66667	0	0
novel_circ_000706	0	0	223.864	0	0	0	0	0.666667	0	0
novel_circ_000707	108.19	72.7484	177.683	0	0	0.333333	0.333333	0.666667	0	0
novel_circ_000708	216.38	124.332	177.683	57.8202	0	0.666667	0.666667	0.666667	0.333333	0
novel_circ_000709	0	62.1659	0	133.869	135.777	0	0.333333	0	0.666667	0.666667
novel_circ_000710	6733.08	3213.9	6156.93	4321.28	3847.33	20.6667	16	21.3333	23	20
novel_circ_000711	0	0	266.525	0	0	0	0	1	0	0
novel_circ_000712	216.38	0	0	115.64	0	0.666667	0	0	0.666667	0
novel_circ_000713	108.19	128.18	0	133.869	0	0.333333	0.666667	0	0.666667	0
novel_circ_000714	217.865	0	803.094	0	135.777	0.666667	0	2.66667	0	0.666667
novel_circ_000715	773.567	134.914	603.247	66.9344	134.998	2.33333	0.666667	2	0.333333	0.666667
novel_circ_000716	0	1361.28	0	1536.22	616.966	0	7	0	8.66667	3.33333
novel_circ_000717	326.055	378.768	847.608	868.133	850.895	1	2	3	4.66667	4.33333
novel_circ_000718	2397.93	762.346	1695.22	703.749	1046.61	7.33333	4	6	4	5.33333
novel_circ_000719	0	0	445.752	0	236.616	0	0	1.66667	0	1.33333
novel_circ_000720	0	72.7484	0	117.226	0	0	0.333333	0	0.666667	0
novel_circ_000721	0	0	0	0	201.329	0	0	0	0	1
novel_circ_000722	0	0	0	133.869	0	0	0	0	0.666667	0
novel_circ_000723	1966.66	1444.62	2518.93	1201.58	982.613	6	7.33333	8.66667	6.66667	5
novel_circ_000724	0	427.832	89.1504	200.803	236.616	0	2	0.333333	1	1.33333
novel_circ_000725	0	248.663	0	0	0	0	1.33333	0	0	0
novel_circ_000726	0	290.994	0	0	0	0	1.33333	0	0	0
novel_circ_000727	210.504	0	0	0	0	0.666667	0	0	0	0
novel_circ_000728	0	0	0	293.066	59.1541	0	0	0	1.66667	0.333333
novel_circ_000729	0	256.361	0	351.679	262.041	0	1.33333	0	2	1.33333
novel_circ_000730	323.117	415.325	0	175.84	261.262	1	2	0	1	1.33333
novel_circ_000731	112.613	72.7484	491.006	133.869	0	0.333333	0.333333	1.66667	0.666667	0
novel_circ_000732	0	124.332	0	0	0	0	0.666667	0	0	0
novel_circ_000733	0	0	0	249.509	244.572	0	0	0	1.33333	1.33333
novel_circ_000734	788.288	0	0	0	0	2.33333	0	0	0	0
novel_circ_000735	563.063	0	0	0	0	1.66667	0	0	0	0
novel_circ_000736	0	0	0	117.226	0	0	0	0	0.666667	0
novel_circ_000737	0	0	0	0	295.77	0	0	0	0	1.66667
novel_circ_000738	766.175	577.773	111.932	191.689	67.1096	2.33333	3	0.333333	1	0.333333
novel_circ_000739	0	192.271	0	0	0	0	1	0	0	0
novel_circ_000740	210.504	731.928	223.864	694.672	202.108	0.666667	3.66667	0.666667	3.66667	1
novel_circ_000741	0	0	0	0	271.555	0	0	0	0	1.33333
novel_circ_000742	225.225	0	0	0	0	0.666667	0	0	0	0
novel_circ_000743	441.605	72.7484	0	133.869	394.702	1.33333	0.333333	0	0.666667	2
novel_circ_000744	991.4	72.7484	1003.44	644.38	574.502	3	0.333333	3.66667	3.33333	3
novel_circ_000745	333.415	637.42	1449.31	625.359	329.151	1	3	5	3.33333	1.66667
novel_circ_000746	0	290.994	0	0	0	0	1.33333	0	0	0
novel_circ_000747	0	0	447.728	133.869	0	0	0	1.33333	0.666667	0
novel_circ_000748	757.33	0	0	0	0	2.33333	0	0	0	0
novel_circ_000749	0	0	0	0	497.099	0	0	0	0	2.66667
novel_circ_000750	641.811	62.1659	623.126	0	531.258	2	0.333333	2.33333	0	2.66667
novel_circ_000751	0	124.332	0	0	0	0	0.666667	0	0	0
novel_circ_000752	315.756	0	468.534	173.461	127.043	1	0	1.66667	1	0.666667
novel_circ_000753	0	0	1185.07	0	0	0	0	3.66667	0	0
novel_circ_000754	0	0	447.728	0	0	0	0	1.33333	0	0
novel_circ_000755	15990	6170.1	11679.4	4405.22	3648.17	49	31	41	23.6667	19
novel_circ_000756	0	0	0	0	177.462	0	0	0	0	1
novel_circ_000757	0	0	0	117.226	0	0	0	0	0.666667	0
novel_circ_000758	0	128.18	0	0	0	0	0.666667	0	0	0
novel_circ_000759	105.252	363.742	1743.37	173.461	67.1096	0.333333	1.66667	5.66667	1	0.333333
novel_circ_000760	105.252	0	178.301	58.6132	0	0.333333	0	0.666667	0.333333	0
novel_circ_000761	0	0	178.301	0	0	0	0	0.666667	0	0
novel_circ_000762	0	0	0	173.461	0	0	0	0	1	0
novel_circ_000763	0	145.497	177.683	0	0	0	0.666667	0.666667	0	0
novel_circ_000764	216.38	0	0	0	0	0.666667	0	0	0	0
novel_circ_000765	563.063	0	0	0	0	1.66667	0	0	0	0
novel_circ_000766	0	124.332	0	0	0	0	0.666667	0	0	0
novel_circ_000767	112.613	0	0	200.803	0	0.333333	0	0	1	0
novel_circ_000768	0	0	0	0	135.777	0	0	0	0	0.666667
novel_circ_000769	0	427.832	0	0	1087.51	0	2	0	0	5.66667
novel_circ_000770	0	0	0	200.803	0	0	0	0	1	0
novel_circ_000771	979.649	0	625.411	66.9344	0	3	0	2	0.333333	0
novel_circ_000772	0	572	356.602	292.273	134.219	0	3	1.33333	1.66667	0.666667
novel_circ_000773	0	0	178.301	0	0	0	0	0.666667	0	0
novel_circ_000774	0	0	0	0	202.108	0	0	0	0	1
novel_circ_000775	675.676	0	0	0	0	2	0	0	0	0
novel_circ_000776	0	124.332	0	0	0	0	0.666667	0	0	0
novel_circ_000777	0	0	0	308.122	135.777	0	0	0	1.66667	0.666667
novel_circ_000778	967.834	145.497	1228.35	192.482	0	3	0.666667	4	1	0
novel_circ_000779	0	269.829	0	0	134.219	0	1.33333	0	0	0.666667
novel_circ_000780	0	188.422	0	267.738	454.635	0	1	0	1.33333	2.33333
novel_circ_000781	7246.75	128.18	6644.54	810.313	194.152	22	0.666667	23	4.33333	1
novel_circ_000782	1307.13	64.0902	0	0	0	4	0.333333	0	0	0
novel_circ_000783	6607.23	7803.74	7492.03	7181.49	8030.82	20.3333	39.6667	26.3333	38.6667	41.6667
novel_circ_000784	7586.91	12075.4	7533.14	13734.7	9223.48	23.3333	61.3333	26.6667	75.6667	47.3333
novel_circ_000785	536.559	1438.84	355.984	885.933	699.207	1.66667	7.33333	1.33333	5	3.66667
novel_circ_000786	0	0	0	115.64	0	0	0	0	0.666667	0
novel_circ_000787	0	0	0	0	295.77	0	0	0	0	1.66667
novel_circ_000788	0	0	0	0	201.329	0	0	0	0	1
novel_circ_000789	0	0	0	0	201.329	0	0	0	0	1
novel_circ_000790	0	145.497	0	0	0	0	0.666667	0	0	0
novel_circ_000791	0	218.245	356.602	0	0	0	1	1.33333	0	0
novel_circ_000792	0	0	0	0	134.219	0	0	0	0	0.666667
novel_circ_000793	315.756	0	0	0	0	1	0	0	0	0
novel_circ_000794	105.252	0	0	301.387	185.418	0.333333	0	0	1.66667	1
novel_circ_000795	4170.29	723.27	3705.54	1306.95	1554	12.6667	3.66667	12.3333	7	8
novel_circ_000796	4173.23	723.27	3705.54	1596.05	1554	12.6667	3.66667	12.3333	8.66667	8
novel_circ_000797	0	0	335.796	0	0	0	0	1	0	0
novel_circ_000798	0	0	335.796	0	0	0	0	1	0	0
novel_circ_000799	0	0	0	0	268.438	0	0	0	0	1.33333
novel_circ_000800	0	254.437	89.1504	58.6132	67.8887	0	1.33333	0.333333	0.333333	0.333333
novel_circ_000801	0	0	0	0	135.777	0	0	0	0	0.666667
novel_circ_000802	0	581.987	0	0	0	0	2.66667	0	0	0
novel_circ_000803	105.252	0	111.932	0	490.702	0.333333	0	0.333333	0	2.66667
novel_circ_000804	0	0	0	0	203.666	0	0	0	0	1
novel_circ_000805	0	145.497	0	0	0	0	0.666667	0	0	0
novel_circ_000806	0	0	0	0	134.219	0	0	0	0	0.666667
novel_circ_000807	0	192.271	0	0	0	0	1	0	0	0
novel_circ_000808	108.19	836.424	514.097	356.828	379.57	0.333333	4	1.66667	2	2
novel_circ_000809	646.234	126.256	823.591	376.643	448.238	2	0.666667	3	2	2.33333
novel_circ_000810	2507.61	1195.95	2427.49	3042.85	2757.67	7.66667	6	8.66667	16	14.6667
novel_circ_000811	4803.23	2424.61	1448.26	2212.7	3022.29	14.6667	12	5.33333	12	15.3333
novel_circ_000812	8247.77	4642.16	5818.97	6232.96	5586.75	25.3333	23.3333	20.3333	33.6667	29
novel_circ_000813	63774	32770.6	42976.9	46746.7	60195.9	196	165.667	150.667	252.667	313.667
novel_circ_000814	8764.44	2734.11	4594.76	2664.6	3877.24	26.6667	14	16	14.3333	19.6667
novel_circ_000815	1938.67	864.918	1046.84	1893.45	2313.14	6	4.33333	3.66667	10.6667	12
novel_circ_000816	108.19	1822.42	0	2055.84	2162.58	0.333333	9.33333	0	11.3333	11.6667
novel_circ_000817	868.489	320.451	668.998	425.349	135.777	2.66667	1.66667	2.33333	2.33333	0.666667
novel_circ_000818	770.598	128.18	178.301	308.915	397.039	2.33333	0.666667	0.666667	1.66667	2
novel_circ_000819	542.435	126.256	266.833	517.247	726.19	1.66667	0.666667	1	2.66667	3.66667
novel_circ_000820	0	128.18	111.932	192.482	135.777	0	0.666667	0.333333	1	0.666667
novel_circ_000821	225.225	0	0	0	0	0.666667	0	0	0	0
novel_circ_000822	0	719.421	533.667	542.575	362.88	0	3.66667	2	3	2
novel_circ_000823	0	0	0	0	203.666	0	0	0	0	1
novel_circ_000824	434.245	325.261	88.8415	569.125	935.474	1.33333	1.66667	0.333333	3	4.66667
novel_circ_000825	337.838	0	0	0	0	1	0	0	0	0
novel_circ_000826	0	0	223.864	0	0	0	0	0.666667	0	0
novel_circ_000827	0	256.361	0	57.8202	201.329	0	1.33333	0	0.333333	1
novel_circ_000828	0	398.009	0	542.575	193.373	0	2	0	3	1
novel_circ_000829	1422.74	655.331	3462.42	375.85	429.99	4.33333	3.33333	11.3333	2	2.33333
novel_circ_000830	0	62.1659	424.946	234.453	0	0	0.333333	1.33333	1.33333	0
novel_circ_000831	847.892	134.914	1112.9	351.679	134.219	2.66667	0.666667	4	2	0.666667
novel_circ_000832	210.504	0	0	0	0	0.666667	0	0	0	0
novel_circ_000833	0	0	0	200.803	0	0	0	0	1	0
novel_circ_000834	0	0	0	0	203.666	0	0	0	0	1
novel_circ_000835	0	0	0	0	203.666	0	0	0	0	1
novel_circ_000836	324.57	62.1659	223.864	173.461	0	1	0.333333	0.666667	1	0
novel_circ_000837	108.19	0	0	133.869	0	0.333333	0	0	0.666667	0
novel_circ_000838	0	280.411	513.479	0	0	0	1.33333	1.66667	0	0
novel_circ_000839	1087.84	186.498	3285.78	367.529	529.7	3.33333	1	10.3333	2	2.66667
novel_circ_000840	0	0	0	0	177.462	0	0	0	0	1
novel_circ_000841	0	128.18	0	0	0	0	0.666667	0	0	0
novel_circ_000842	324.57	1324.13	178.301	2097.82	1454.29	1	6.66667	0.666667	11.6667	7.66667
novel_circ_000843	0	0	0	57.8202	327.592	0	0	0	0.333333	1.66667
novel_circ_000844	554.218	1076.43	178.301	292.273	507.392	1.66667	5.33333	0.666667	1.66667	2.66667
novel_circ_000845	4247.52	1233.1	2098.12	1935.85	5584.51	13	6.33333	7	10.6667	28.6667
novel_circ_000846	225.225	62.1659	447.728	58.6132	203.666	0.666667	0.333333	1.33333	0.333333	1
novel_circ_000847	421.008	0	0	0	0	1.33333	0	0	0	0
novel_circ_000848	0	256.361	0	0	0	0	1.33333	0	0	0
novel_circ_000849	0	0	0	231.281	0	0	0	0	1.33333	0
novel_circ_000850	631.512	0	0	0	0	2	0	0	0	0
novel_circ_000851	0	384.541	0	0	236.616	0	2	0	0	1.33333
novel_circ_000852	0	1602.62	0	1096.28	1443.65	0	8	0	5.66667	7.33333
novel_circ_000853	105.252	124.332	0	232.074	134.219	0.333333	0.666667	0	1.33333	0.666667
novel_circ_000854	0	186.498	0	0	339.443	0	1	0	0	1.66667
novel_circ_000855	0	0	0	133.869	0	0	0	0	0.666667	0
novel_circ_000856	3217.84	4300.77	4618.28	3288.37	4013.21	10	22.3333	15.6667	17.6667	20.6667
novel_circ_000857	1391.78	389.351	1827.77	1247.91	1514.04	4.33333	2	6.33333	7	7.66667
novel_circ_000858	0	0	0	0	236.616	0	0	0	0	1.33333
novel_circ_000859	0	186.498	0	0	0	0	1	0	0	0
novel_circ_000860	0	0	0	66.9344	135.777	0	0	0	0.333333	0.666667
novel_circ_000861	982.587	903.399	2342.48	693.879	515.347	3	4.33333	8	3.66667	2.66667
novel_circ_000862	0	290.994	0	0	0	0	1.33333	0	0	0
novel_circ_000863	421.008	460.175	0	673.272	329.151	1.33333	2.33333	0	3.66667	1.66667
novel_circ_000864	0	290.994	0	0	0	0	1.33333	0	0	0
novel_circ_000865	0	0	223.864	0	0	0	0	0.666667	0	0
novel_circ_000866	1071.63	646.673	648.81	1052.29	1026.02	3.33333	3.33333	2	5.66667	5.33333
novel_circ_000867	0	0	0	0	134.219	0	0	0	0	0.666667
novel_circ_000868	0	197.08	0	0	0	0	1	0	0	0
novel_circ_000869	0	0	0	0	203.666	0	0	0	0	1
novel_circ_000870	0	62.1659	312.705	0	0	0	0.333333	1	0	0
novel_circ_000871	0	0	0	0	134.219	0	0	0	0	0.666667
novel_circ_000872	1502.91	0	0	0	0	4.66667	0	0	0	0
novel_circ_000873	216.38	0	0	0	0	0.666667	0	0	0	0
novel_circ_000874	0	0	0	115.64	0	0	0	0	0.666667	0
novel_circ_000875	225.225	207.663	312.705	191.689	0	0.666667	1	1	1	0
novel_circ_000876	0	0	536.569	0	0	0	0	1.66667	0	0
novel_circ_000877	337.838	0	1047.76	58.6132	0	1	0	3.66667	0.333333	0
novel_circ_000878	108.19	0	445.443	66.9344	0	0.333333	0	1.66667	0.333333	0
novel_circ_000879	112.613	0	536.878	66.9344	0	0.333333	0	1.66667	0.333333	0
novel_circ_000880	0	0	0	0	271.555	0	0	0	0	1.33333
novel_circ_000881	0	0	267.451	0	0	0	0	1	0	0
novel_circ_000882	0	128.18	0	0	271.555	0	0.666667	0	0	1.33333
novel_circ_000883	653.594	785.436	1068.26	1437.26	1854.96	2	4	4	7.66667	10
novel_circ_000884	766.207	0	88.8415	316.444	67.1096	2.33333	0	0.333333	1.66667	0.333333
novel_circ_000885	0	256.361	88.8415	0	543.109	0	1.33333	0.333333	0	2.66667
novel_circ_000886	0	209.587	0	183.368	407.332	0	1	0	1	2
novel_circ_000887	0	0	0	133.869	0	0	0	0	0.666667	0
novel_circ_000888	0	0	0	234.453	0	0	0	0	1.33333	0
novel_circ_000889	0	0	0	234.453	0	0	0	0	1.33333	0
novel_circ_000890	757.33	0	267.142	578.202	0	2.33333	0	1	3.33333	0
novel_circ_000891	0	0	0	0	134.219	0	0	0	0	0.666667
novel_circ_000892	0	0	0	115.64	271.555	0	0	0	0.666667	1.33333
novel_circ_000893	0	218.245	849.275	173.461	0	0	1	2.66667	1	0
novel_circ_000894	0	124.332	0	0	0	0	0.666667	0	0	0
novel_circ_000895	108.19	0	0	117.226	118.308	0.333333	0	0	0.666667	0.666667
novel_circ_000896	0	0	0	0	469.767	0	0	0	0	2.33333
novel_circ_000897	1283.62	265.019	979.419	293.066	134.219	4	1.33333	3.66667	1.66667	0.666667
novel_circ_000898	0	0	401.547	0	0	0	0	1.33333	0	0
novel_circ_000899	0	192.271	0	0	193.373	0	1	0	0	1
novel_circ_000900	1112.86	843.158	868.845	251.095	707.163	3.33333	4	3	1.33333	3.66667
novel_circ_000901	0	124.332	178.301	117.226	319.637	0	0.666667	0.666667	0.666667	1.66667
novel_circ_000902	0	372.995	0	0	0	0	2	0	0	0
novel_circ_000903	0	0	0	117.226	0	0	0	0	0.666667	0
novel_circ_000904	0	0	177.683	0	0	0	0	0.666667	0	0
novel_circ_000905	0	128.18	913.668	409.499	321.974	0	0.666667	3.33333	2.33333	1.66667
novel_circ_000906	0	124.332	0	0	0	0	0.666667	0	0	0
novel_circ_000907	216.38	207.663	491.315	57.8202	0	0.666667	1	1.66667	0.333333	0
novel_circ_000908	108.19	190.346	356.602	57.8202	67.8887	0.333333	1	1.33333	0.333333	0.333333
novel_circ_000909	0	0	335.796	0	0	0	0	1	0	0
novel_circ_000910	216.38	0	0	0	0	0.666667	0	0	0	0
novel_circ_000911	216.38	0	0	0	0	0.666667	0	0	0	0
novel_circ_000912	0	0	445.752	0	0	0	0	1.66667	0	0
novel_circ_000913	318.694	3779.76	1290.27	2174.66	5367.86	1	19.3333	4.66667	12	27.3333
novel_circ_000914	0	0	356.602	0	0	0	0	1.33333	0	0
novel_circ_000915	864.098	0	178.301	618.624	573.722	2.66667	0	0.666667	3.33333	3
novel_circ_000916	0	0	0	231.281	0	0	0	0	1.33333	0
novel_circ_000917	213.442	0	378.765	500.604	311.681	0.666667	0	1.33333	2.66667	1.66667
novel_circ_000918	105.252	0	378.456	0	0	0.333333	0	1.33333	0	0
novel_circ_000919	0	0	266.833	57.8202	118.308	0	0	1	0.333333	0.666667
novel_circ_000920	666.83	134.914	200.773	191.689	0	2	0.666667	0.666667	1	0
novel_circ_000921	0	0	312.705	0	0	0	0	1	0	0
novel_circ_000922	637.388	124.332	756.913	57.8202	126.264	2	0.666667	2.66667	0.333333	0.666667
novel_circ_000923	112.613	0	88.8415	115.64	0	0.333333	0	0.333333	0.666667	0
novel_circ_000924	4010.58	770.409	3813.96	1215.85	1291.18	12.3333	3.66667	13	6.66667	6.66667
novel_circ_000925	3586.63	802.752	6331.53	1075.67	996.186	11	4	22	5.66667	5
novel_circ_000926	1757.64	477.491	2762.98	499.811	683.296	5.33333	2.33333	9.66667	2.66667	3.66667
novel_circ_000927	217.865	0	579.848	0	194.152	0.666667	0	2	0	1
novel_circ_000928	540.981	0	691.471	58.6132	67.1096	1.66667	0	2.33333	0.333333	0.333333
novel_circ_000929	2082.21	1280.24	3635.65	799.613	1158.52	6.33333	6.33333	12.3333	4.33333	6
novel_circ_000930	2298.59	1183.81	3855.57	797.233	634.435	7	5.66667	13.6667	4.33333	3.33333
novel_circ_000931	546.857	136.839	602.32	57.8202	312.461	1.66667	0.666667	2	0.333333	1.66667
novel_circ_000932	323.117	134.914	668.998	57.8202	67.8887	1	0.666667	2.33333	0.333333	0.333333
novel_circ_000933	220.803	124.332	467.607	191.689	387.526	0.666667	0.666667	1.66667	1	2
novel_circ_000934	539.497	124.332	223.864	58.6132	67.8887	1.66667	0.666667	0.666667	0.333333	0.333333
novel_circ_000935	105.252	145.497	668.689	0	67.1096	0.333333	0.666667	2.33333	0	0.333333
novel_circ_000936	105.252	145.497	1383.25	175.047	67.8887	0.333333	0.666667	4.66667	1	0.333333
novel_circ_000937	0	72.7484	313.014	0	0	0	0.333333	1	0	0
novel_circ_000938	108.19	0	826.493	0	67.1096	0.333333	0	2.66667	0	0.333333
novel_circ_000939	1427.16	333.919	1538.46	125.548	321.195	4.33333	1.66667	5.33333	0.666667	1.66667
novel_circ_000940	0	72.7484	177.683	0	0	0	0.333333	0.666667	0	0
novel_circ_000941	108.19	124.332	402.165	0	194.152	0.333333	0.666667	1.33333	0	1
novel_circ_000942	0	0	177.683	66.9344	0	0	0	0.666667	0.333333	0
novel_circ_000943	431.307	136.839	89.1504	125.548	127.043	1.33333	0.666667	0.333333	0.666667	0.666667
novel_circ_000944	646.234	0	1070.54	300.594	269.217	2	0	3.66667	1.66667	1.33333
novel_circ_000945	1193.09	1228.66	2480.41	509.719	532.038	3.66667	6	8	2.66667	2.66667
novel_circ_000946	1092.26	271.753	958.922	251.095	67.1096	3.33333	1.33333	3.33333	1.33333	0.333333
novel_circ_000947	11361.2	9810.5	10321.4	11892.7	10445.6	34.6667	49.3333	36.3333	65	53.3333
novel_circ_000948	7187.89	5006.86	7848.01	6938.72	6823.69	22	25	27.6667	37.3333	34.6667
novel_circ_000949	2046.86	5583.67	5346.92	6792.1	8302.62	6.33333	28	19	37.3333	42.3333
novel_circ_000950	21663.3	22340.2	27737	26557.8	31621	66.3333	114	99	145.333	162.333
novel_circ_000951	0	0	0	259.416	0	0	0	0	1.33333	0
novel_circ_000952	0	200.929	0	200.803	127.043	0	1	0	1	0.666667
novel_circ_000953	0	124.332	0	133.869	67.1096	0	0.666667	0	0.666667	0.333333
novel_circ_000954	0	128.18	0	133.869	0	0	0.666667	0	0.666667	0
novel_circ_000955	112.613	261.17	467.607	560.011	386.747	0.333333	1.33333	1.66667	3	2
novel_circ_000956	326.055	64.0902	379.074	183.368	370.836	1	0.333333	1.33333	1	2
novel_circ_000957	210.504	321.412	757.531	368.322	134.219	0.666667	1.66667	2.66667	2	0.666667
novel_circ_000958	884.695	399.933	1024.67	417.028	631.318	2.66667	2	3.66667	2.33333	3.33333
novel_circ_000959	2085.11	926.123	1538.77	1508.91	894.918	6.33333	4.66667	5.33333	8.33333	4.66667
novel_circ_000960	978.164	468.833	356.293	627.738	397.818	3	2.33333	1.33333	3.33333	2
novel_circ_000961	1772.33	1041.8	1361.4	1708.13	1258.23	5.33333	5.33333	4.66667	9.33333	6.33333
novel_circ_000962	2171.22	641.863	1115.06	733.471	642.39	6.66667	3.33333	4	4	3.33333
novel_circ_000963	542.435	346.426	267.451	267.738	329.93	1.66667	1.66667	1	1.33333	1.66667
novel_circ_000964	0	72.7484	88.8415	250.302	261.262	0	0.333333	0.333333	1.33333	1.33333
novel_circ_000965	105.252	271.753	111.932	365.943	254.086	0.333333	1.33333	0.333333	2	1.33333
novel_circ_000966	532.136	72.7484	200.773	192.482	0	1.66667	0.333333	0.666667	1	0
novel_circ_000967	853.768	62.1659	444.825	0	0	2.66667	0.333333	1.66667	0	0
novel_circ_000968	662.408	64.0902	111.932	192.482	126.264	2	0.333333	0.333333	1	0.666667
novel_circ_000969	752.939	654.37	356.293	872.061	1411.82	2.33333	3.33333	1.33333	5	7.33333
novel_circ_000970	770.598	586.431	89.1504	600.395	910.829	2.33333	3	0.333333	3.33333	4.66667
novel_circ_000971	0	126.256	491.315	66.9344	59.1541	0	0.666667	1.66667	0.333333	0.333333
novel_circ_000972	754.424	735.777	355.984	482.376	744.787	2.33333	3.66667	1.33333	2.66667	4
novel_circ_000973	0	200.929	0	241.188	194.152	0	1	0	1.33333	1
novel_circ_000974	0	310.829	0	66.9344	59.1541	0	1.66667	0	0.333333	0.333333
novel_circ_000975	315.756	0	0	0	0	1	0	0	0	0
novel_circ_000976	1310.13	714.612	223.864	1045.56	969.983	4	3.66667	0.666667	5.66667	5
novel_circ_000977	1406.53	314.678	355.984	608.717	609.44	4.33333	1.66667	1.33333	3.33333	3
novel_circ_000978	0	1164.57	0	316.444	529.7	0	5.66667	0	1.66667	2.66667
novel_circ_000979	0	404.743	0	0	295.77	0	2	0	0	1.66667
novel_circ_000980	0	218.245	0	0	0	0	1	0	0	0
novel_circ_000981	450.45	0	0	0	311.681	1.33333	0	0	0	1.66667
novel_circ_000982	0	0	0	117.226	0	0	0	0	0.666667	0
novel_circ_000983	0	0	0	117.226	0	0	0	0	0.666667	0
novel_circ_000984	225.225	0	0	0	0	0.666667	0	0	0	0
novel_circ_000985	0	0	0	0	118.308	0	0	0	0	0.666667
novel_circ_000986	526.26	0	0	0	0	1.66667	0	0	0	0
novel_circ_000987	421.008	0	0	0	0	1.33333	0	0	0	0
novel_circ_000988	742.64	713.651	111.932	408.706	271.555	2.33333	3.66667	0.333333	2.33333	1.33333
novel_circ_000989	2160.92	2652.11	3659.98	2192.85	1690.9	6.66667	13.3333	12.3333	12.3333	9
novel_circ_000990	210.504	62.1659	379.383	57.8202	67.8887	0.666667	0.333333	1.33333	0.333333	0.333333
novel_circ_000991	1923.92	2225.24	5822.37	818.634	508.171	6	11.3333	20.3333	4.33333	2.66667
novel_circ_000992	210.504	186.498	88.8415	66.9344	59.1541	0.666667	1	0.333333	0.333333	0.333333
novel_circ_000993	12382	8920.21	17771.9	7243.6	6230.61	38.3333	45.3333	61.6667	39.6667	31.6667
novel_circ_000994	1419.77	425.908	3408.27	585.767	803.162	4.33333	2	12	3	4.33333
novel_circ_000995	859.676	62.1659	780.93	0	429.99	2.66667	0.333333	2.66667	0	2.33333
novel_circ_000996	0	0	0	0	177.462	0	0	0	0	1
novel_circ_000997	0	128.18	0	585.339	59.1541	0	0.666667	0	3.33333	0.333333
novel_circ_000998	0	0	88.8415	292.273	0	0	0	0.333333	1.66667	0
novel_circ_000999	554.218	871.652	1026.96	1590.9	445.901	1.66667	4.33333	3.33333	8.66667	2.33333
novel_circ_001000	0	0	0	200.803	0	0	0	0	1	0
novel_circ_001001	0	448.632	0	117.226	354.925	0	2.33333	0	0.666667	2
novel_circ_001002	0	192.271	0	0	0	0	1	0	0	0
novel_circ_001003	0	0	0	293.066	0	0	0	0	1.66667	0
novel_circ_001004	0	0	0	293.066	0	0	0	0	1.66667	0
novel_circ_001005	0	0	444.208	0	354.925	0	0	1.66667	0	2
novel_circ_001006	216.38	0	0	0	0	0.666667	0	0	0	0
novel_circ_001007	0	0	0	175.84	0	0	0	0	1	0
novel_circ_001008	0	192.271	0	0	0	0	1	0	0	0
novel_circ_001009	0	0	0	0	271.555	0	0	0	0	1.33333
novel_circ_001010	0	0	0	0	203.666	0	0	0	0	1
novel_circ_001011	216.38	0	0	0	0	0.666667	0	0	0	0
novel_circ_001012	1947.48	1709.63	824.208	2363.58	2976.46	6	8.66667	3	13	15.6667
novel_circ_001013	0	0	335.796	0	0	0	0	1	0	0
novel_circ_001014	0	0	0	173.461	0	0	0	0	1	0
novel_circ_001015	0	0	0	173.461	0	0	0	0	1	0
novel_circ_001016	216.38	0	0	0	0	0.666667	0	0	0	0
novel_circ_001017	0	0	178.301	0	0	0	0	0.666667	0	0
novel_circ_001018	432.76	2769.11	401.856	1280.4	1326.12	1.33333	13.6667	1.33333	7	6.66667
novel_circ_001019	108.19	64.0902	402.165	0	135.777	0.333333	0.333333	1.33333	0	0.666667
novel_circ_001020	0	0	0	117.226	0	0	0	0	0.666667	0
novel_circ_001021	0	186.498	0	0	0	0	1	0	0	0
novel_circ_001022	0	0	0	117.226	0	0	0	0	0.666667	0
novel_circ_001023	0	0	177.683	0	0	0	0	0.666667	0	0
novel_circ_001024	0	0	514.097	66.9344	0	0	0	1.66667	0.333333	0
novel_circ_001025	431.307	1099.15	1518.89	559.218	684.854	1.33333	5.66667	5	3	3.66667
novel_circ_001026	2472.26	2936.97	5439.47	1439.6	1770.03	7.66667	15	19.3333	8	9.33333
novel_circ_001027	0	0	0	0	135.777	0	0	0	0	0.666667
novel_circ_001028	321.632	401.858	0	231.281	135.777	1	2	0	1.33333	0.666667
novel_circ_001029	9317.86	6754.84	14362.9	4809.17	8879.73	28.6667	34.6667	50	26	46.3333
novel_circ_001030	7152.61	3402.55	4682.37	3232.14	4270.57	22	17.6667	16.3333	17.3333	22
novel_circ_001031	10809	12206.8	16007.7	11793	11944.7	33.3333	61.6667	55.6667	63.6667	62.3333
novel_circ_001032	0	256.361	0	0	0	0	1.33333	0	0	0
novel_circ_001033	766.207	0	89.1504	133.869	126.264	2.33333	0	0.333333	0.666667	0.666667
novel_circ_001034	434.245	145.497	935.832	133.869	134.219	1.33333	0.666667	3.33333	0.666667	0.666667
novel_circ_001035	434.245	145.497	1160	133.869	134.219	1.33333	0.666667	4	0.666667	0.666667
novel_circ_001036	428.369	145.497	178.301	0	0	1.33333	0.666667	0.666667	0	0
novel_circ_001037	659.47	197.08	467.607	125.548	202.887	2	1	1.66667	0.666667	1
novel_circ_001038	15698.6	6881	19333.1	4551.38	3460.58	47.6667	33.6667	66.3333	24.3333	18
novel_circ_001039	0	218.245	0	0	0	0	1	0	0	0
novel_circ_001040	0	218.245	0	0	0	0	1	0	0	0
novel_circ_001041	757.33	0	0	0	0	2.33333	0	0	0	0
novel_circ_001042	112.613	0	0	115.64	338.664	0.333333	0	0	0.666667	1.66667
novel_circ_001043	0	0	0	117.226	0	0	0	0	0.666667	0
novel_circ_001044	0	0	0	117.226	0	0	0	0	0.666667	0
novel_circ_001045	0	0	111.932	58.6132	201.329	0	0	0.333333	0.333333	1
novel_circ_001046	105.252	0	668.071	0	67.1096	0.333333	0	2.33333	0	0.333333
novel_circ_001047	435.729	199.005	491.006	0	0	1.33333	1	1.66667	0	0
novel_circ_001048	328.993	543.506	1380.35	334.672	499.436	1	2.66667	5	1.66667	2.66667
novel_circ_001049	976.679	614.33	3115.44	234.453	1284	3	3	11.3333	1.33333	6.66667
novel_circ_001050	216.38	0	0	0	0	0.666667	0	0	0	0
novel_circ_001051	3073.58	4440.5	888.415	4753.26	3756.95	9.33333	23	3.33333	26.3333	19.3333
novel_circ_001052	0	0	0	133.869	0	0	0	0	0.666667	0
novel_circ_001053	0	0	0	175.84	0	0	0	0	1	0
novel_circ_001054	0	64.0902	0	117.226	0	0	0.333333	0	0.666667	0
novel_circ_001055	0	64.0902	0	592.074	67.1096	0	0.333333	0	3.33333	0.333333
novel_circ_001056	0	126.256	444.825	641.573	446.68	0	0.666667	1.66667	3.66667	2.33333
novel_circ_001057	315.756	0	0	0	0	1	0	0	0	0
novel_circ_001058	0	0	0	251.095	0	0	0	0	1.33333	0
novel_circ_001059	0	0	0	133.869	0	0	0	0	0.666667	0
novel_circ_001060	0	0	0	133.869	0	0	0	0	0.666667	0
novel_circ_001061	112.613	64.0902	0	1196.5	59.1541	0.333333	0.333333	0	6	0.333333
novel_circ_001062	0	290.994	0	0	0	0	1.33333	0	0	0
novel_circ_001063	0	269.829	0	66.9344	0	0	1.33333	0	0.333333	0
novel_circ_001064	0	0	0	116.433	134.219	0	0	0	0.666667	0.666667
novel_circ_001065	0	124.332	0	0	0	0	0.666667	0	0	0
novel_circ_001066	0	124.332	0	0	0	0	0.666667	0	0	0
novel_circ_001067	0	316.602	0	0	0	0	1.66667	0	0	0
novel_circ_001068	328.993	960.756	467.916	249.509	643.169	1	4.66667	1.66667	1.33333	3.33333
novel_circ_001069	761.784	382.617	1788.63	451.105	269.997	2.33333	2	5.66667	2.33333	1.33333
novel_circ_001070	0	190.346	266.525	0	59.1541	0	1	1	0	0.333333
novel_circ_001071	989.947	331.994	892.553	57.8202	245.351	3	1.66667	3	0.333333	1.33333
novel_circ_001072	1096.65	385.502	1427.15	569.125	810.339	3.33333	2	5	3	4.33333
novel_circ_001073	0	0	0	234.453	437.945	0	0	0	1.33333	2.33333
novel_circ_001074	0	0	0	0	134.219	0	0	0	0	0.666667
novel_circ_001075	0	0	0	133.869	244.572	0	0	0	0.666667	1.33333
novel_circ_001076	112.613	353.16	0	0	271.555	0.333333	1.66667	0	0	1.33333
novel_circ_001077	324.57	0	0	0	0	1	0	0	0	0
novel_circ_001078	210.504	0	0	0	0	0.666667	0	0	0	0
novel_circ_001079	0	0	0	0	118.308	0	0	0	0	0.666667
novel_circ_001080	318.694	439.01	671.592	474.055	135.777	1	2.33333	2	2.66667	0.666667
novel_circ_001081	0	0	335.796	0	0	0	0	1	0	0
novel_circ_001082	649.14	0	0	0	0	2	0	0	0	0
novel_circ_001083	558.64	250.588	335.796	175.84	362.88	1.66667	1.33333	1	1	2
novel_circ_001084	1951.91	489.998	889.033	1662.23	796.416	6	2.33333	3.33333	8.66667	4
novel_circ_001085	0	0	177.683	0	0	0	0	0.666667	0	0
novel_circ_001086	0	0	88.8415	117.226	201.329	0	0	0.333333	0.666667	1
novel_circ_001087	0	0	0	0	135.777	0	0	0	0	0.666667
novel_circ_001088	0	0	177.683	0	0	0	0	0.666667	0	0
novel_circ_001089	0	0	0	133.869	0	0	0	0	0.666667	0
novel_circ_001090	216.38	0	0	0	0	0.666667	0	0	0	0
novel_circ_001091	443.09	0	0	58.6132	339.443	1.33333	0	0	0.333333	1.66667
novel_circ_001092	324.57	0	0	0	0	1	0	0	0	0
novel_circ_001093	112.613	145.497	916.261	231.281	0	0.333333	0.666667	3	1.33333	0
novel_circ_001094	225.225	72.7484	447.728	0	0	0.666667	0.333333	1.33333	0	0
novel_circ_001095	0	128.18	0	0	0	0	0.666667	0	0	0
novel_circ_001096	653.594	0	0	0	0	2	0	0	0	0
novel_circ_001097	0	0	0	0	295.77	0	0	0	0	1.66667
novel_circ_001098	0	145.497	0	0	0	0	0.666667	0	0	0
novel_circ_001099	535.074	192.271	0	0	508.171	1.66667	1	0	0	2.66667
novel_circ_001100	0	0	177.683	0	0	0	0	0.666667	0	0
novel_circ_001101	563.063	0	0	0	0	1.66667	0	0	0	0
novel_circ_001102	216.38	0	0	384.964	253.306	0.666667	0	0	2	1.33333
novel_circ_001103	736.765	0	0	0	0	2.33333	0	0	0	0
novel_circ_001104	0	124.332	88.8415	316.444	0	0	0.666667	0.333333	1.66667	0
novel_circ_001105	0	363.742	0	523.554	118.308	0	1.66667	0	3	0.666667
novel_circ_001106	0	0	0	351.679	0	0	0	0	2	0
novel_circ_001107	431.307	598.938	692.397	858.226	522.524	1.33333	3	2.33333	4.66667	2.66667
novel_circ_001108	1098.14	519.456	981.395	1068.94	1607.35	3.33333	2.66667	3.33333	5.66667	8
novel_circ_001109	330.477	346.426	0	66.9344	271.555	1	1.66667	0	0.333333	1.33333
novel_circ_001110	0	0	0	0	118.308	0	0	0	0	0.666667
novel_circ_001111	225.225	0	0	0	0	0.666667	0	0	0	0
novel_circ_001112	0	248.663	0	0	0	0	1.33333	0	0	0
novel_circ_001113	0	0	111.932	115.64	203.666	0	0	0.333333	0.666667	1
novel_circ_001114	0	0	0	0	473.233	0	0	0	0	2.66667
novel_circ_001115	0	699.219	267.142	434.463	371.615	0	3.66667	1	2.33333	2
novel_circ_001116	0	0	0	0	134.219	0	0	0	0	0.666667
novel_circ_001117	1000.25	128.18	356.602	318.03	843.719	3	0.666667	1.33333	1.66667	4.33333
novel_circ_001118	108.19	0	266.525	910.532	177.462	0.333333	0	1	4.66667	1
novel_circ_001119	0	0	177.683	0	0	0	0	0.666667	0	0
novel_circ_001120	450.45	290.994	0	173.461	0	1.33333	1.33333	0	1	0
novel_circ_001121	0	0	0	267.738	0	0	0	0	1.33333	0
novel_circ_001122	0	0	0	115.64	0	0	0	0	0.666667	0
novel_circ_001123	0	372.995	0	0	0	0	2	0	0	0
novel_circ_001124	0	0	0	0	135.777	0	0	0	0	0.666667
novel_circ_001125	0	145.497	0	0	0	0	0.666667	0	0	0
novel_circ_001126	4932.05	1561.62	2987.46	2512.83	4741.47	15	7.66667	10.3333	14.3333	24.6667
novel_circ_001127	1744.37	586.431	1804.25	731.092	2421.15	5.33333	3	6.66667	4	12.6667
novel_circ_001128	0	474.606	89.1504	0	186.197	0	2.33333	0.333333	0	1
novel_circ_001129	0	186.498	0	0	0	0	1	0	0	0
novel_circ_001130	0	64.0902	0	289.101	203.666	0	0.333333	0	1.66667	1
novel_circ_001131	2276.48	1770.84	957.686	3147.34	3123.91	7	9	3.33333	17.3333	16
novel_circ_001132	210.504	128.18	0	116.433	127.043	0.666667	0.666667	0	0.666667	0.666667
novel_circ_001133	0	124.332	0	117.226	0	0	0.666667	0	0.666667	0
novel_circ_001134	563.063	0	0	117.226	0	1.66667	0	0	0.666667	0
novel_circ_001135	0	593.165	0	635.266	531.258	0	3	0	3.33333	2.66667
novel_circ_001136	0	425.908	0	117.226	252.527	0	2	0	0.666667	1.33333
novel_circ_001137	0	128.18	0	258.623	203.666	0	0.666667	0	1.33333	1
novel_circ_001138	213.442	145.497	0	174.254	260.483	0.666667	0.666667	0	1	1.33333
novel_circ_001139	0	0	0	117.226	0	0	0	0	0.666667	0
novel_circ_001140	0	192.271	289.615	57.8202	236.616	0	1	1	0.333333	1.33333
novel_circ_001141	328.993	0	177.683	183.368	253.306	1	0	0.666667	1	1.33333
novel_circ_001142	112.613	64.0902	0	258.623	201.329	0.333333	0.333333	0	1.33333	1
novel_circ_001143	0	661.104	0	484.755	67.8887	0	3.33333	0	2.66667	0.333333
novel_circ_001144	112.613	128.18	0	360	0	0.333333	0.666667	0	2	0
novel_circ_001145	112.613	530.038	266.525	594.453	0	0.333333	2.66667	1	3.33333	0
novel_circ_001146	0	0	266.525	0	67.8887	0	0	1	0	0.333333
novel_circ_001147	0	675.535	177.683	133.869	0	0	3.33333	0.666667	0.666667	0
novel_circ_001148	0	186.498	0	0	0	0	1	0	0	0
novel_circ_001149	984.071	62.1659	1541.05	500.604	126.264	3	0.333333	5	2.66667	0.666667
novel_circ_001150	330.477	62.1659	2071.82	66.9344	194.152	1	0.333333	7.33333	0.333333	1
novel_circ_001151	315.756	197.08	1047.76	124.755	0	1	1	3.66667	0.666667	0
novel_circ_001152	549.795	145.497	823.9	57.8202	0	1.66667	0.666667	3	0.333333	0
novel_circ_001153	429.822	218.245	978.801	258.623	203.666	1.33333	1	3.66667	1.33333	1
novel_circ_001154	431.307	136.839	1025.6	0	134.219	1.33333	0.666667	3.66667	0	0.666667
novel_circ_001155	0	0	0	0	118.308	0	0	0	0	0.666667
novel_circ_001156	0	0	0	0	118.308	0	0	0	0	0.666667
novel_circ_001157	1001.73	282.336	1202.66	125.548	0	3	1.33333	4.33333	0.666667	0
novel_circ_001158	0	0	0	115.64	0	0	0	0	0.666667	0
novel_circ_001159	220.803	0	178.301	58.6132	67.1096	0.666667	0	0.666667	0.333333	0.333333
novel_circ_001160	5646.6	6234.56	5972.33	5059.8	6452.26	17.3333	31	21	28	33
novel_circ_001161	337.838	134.914	88.8415	184.161	118.308	1	0.666667	0.333333	1	0.666667
novel_circ_001162	0	0	0	0	203.666	0	0	0	0	1
novel_circ_001163	0	0	0	346.921	0	0	0	0	2	0
novel_circ_001164	112.613	0	401.856	250.302	67.8887	0.333333	0	1.33333	1.33333	0.333333
novel_circ_001165	0	124.332	0	0	0	0	0.666667	0	0	0
novel_circ_001166	225.225	0	0	0	0	0.666667	0	0	0	0
novel_circ_001167	554.218	0	1449.93	0	0	1.66667	0	5	0	0
novel_circ_001168	0	0	0	293.066	0	0	0	0	1.66667	0
novel_circ_001169	0	0	0	173.461	0	0	0	0	1	0
novel_circ_001170	1873.16	1646.87	6020.06	994.474	734.924	5.66667	8	21	5.33333	3.66667
novel_circ_001171	112.613	188.422	646.217	133.869	0	0.333333	1	2.33333	0.666667	0
novel_circ_001172	540.981	757.902	1914.32	66.9344	327.592	1.66667	3.66667	7	0.333333	1.66667
novel_circ_001173	112.613	72.7484	111.932	66.9344	135.777	0.333333	0.333333	0.333333	0.333333	0.666667
novel_circ_001174	3386.43	648.597	3567	491.49	777.388	10.3333	3.33333	12.3333	2.66667	4
novel_circ_001175	432.76	0	0	0	0	1.33333	0	0	0	0
novel_circ_001176	0	384.541	0	0	0	0	2	0	0	0
novel_circ_001177	0	290.994	0	0	0	0	1.33333	0	0	0
novel_circ_001178	323.117	1466.37	490.697	811.106	869.493	1	7.66667	1.66667	4.33333	4.66667
novel_circ_001179	0	128.18	0	0	0	0	0.666667	0	0	0
novel_circ_001180	0	0	0	351.679	0	0	0	0	2	0
novel_circ_001181	0	0	0	173.461	0	0	0	0	1	0
novel_circ_001182	0	0	0	115.64	59.1541	0	0	0	0.666667	0.333333
novel_circ_001183	649.171	541.582	557.066	356.828	388.305	2	2.66667	2	2	2
novel_circ_001184	0	145.497	0	0	0	0	0.666667	0	0	0
novel_circ_001185	0	0	178.301	0	0	0	0	0.666667	0	0
novel_circ_001186	210.504	2035.86	444.516	2443.52	1845.87	0.666667	10.3333	1.66667	14	9.66667
novel_circ_001187	0	509.239	0	0	0	0	2.33333	0	0	0
novel_circ_001188	0	124.332	0	0	0	0	0.666667	0	0	0
novel_circ_001189	0	186.498	0	0	0	0	1	0	0	0
novel_circ_001190	538.012	136.839	445.134	299.801	194.152	1.66667	0.666667	1.66667	1.66667	1
novel_circ_001191	432.76	136.839	533.976	175.047	261.262	1.33333	0.666667	2	1	1.33333
novel_circ_001192	0	62.1659	0	309.708	0	0	0.333333	0	1.66667	0
novel_circ_001193	0	0	0	0	236.616	0	0	0	0	1.33333
novel_circ_001194	900.901	0	0	0	0	2.66667	0	0	0	0
novel_circ_001195	112.613	64.0902	0	0	118.308	0.333333	0.333333	0	0	0.666667
novel_circ_001196	0	0	0	0	354.925	0	0	0	0	2
novel_circ_001197	105.252	0	0	117.226	0	0.333333	0	0	0.666667	0
novel_circ_001198	330.477	128.18	0	133.869	203.666	1	0.666667	0	0.666667	1
novel_circ_001199	0	145.497	0	359.207	202.108	0	0.666667	0	2	1
novel_circ_001200	0	62.1659	0	117.226	0	0	0.333333	0	0.666667	0
novel_circ_001201	1081.93	3442.36	712.585	4490.75	3662.94	3.33333	17.3333	2.66667	24.3333	18.3333
novel_circ_001202	0	145.497	0	173.461	0	0	0.666667	0	1	0
novel_circ_001203	216.38	0	0	0	0	0.666667	0	0	0	0
novel_circ_001204	0	128.18	0	173.461	0	0	0.666667	0	1	0
novel_circ_001205	216.38	0	0	175.84	0	0.666667	0	0	1	0
novel_circ_001206	766.207	145.497	1494.87	133.869	0	2.33333	0.666667	5	0.666667	0
novel_circ_001207	0	633.205	0	0	0	0	3.33333	0	0	0
novel_circ_001208	0	128.18	0	0	0	0	0.666667	0	0	0
novel_circ_001209	225.225	124.332	0	0	67.8887	0.666667	0.666667	0	0	0.333333
novel_circ_001210	0	0	0	0	118.308	0	0	0	0	0.666667
novel_circ_001211	0	0	0	115.64	0	0	0	0	0.666667	0
novel_circ_001212	105.252	72.7484	355.984	192.482	126.264	0.333333	0.333333	1.33333	1	0.666667
novel_circ_001213	216.38	503.1	0	249.509	0	0.666667	2.66667	0	1.33333	0
novel_circ_001214	328.993	0	177.992	0	0	1	0	0.666667	0	0
novel_circ_001215	11397.1	28079	13870	29135.7	7338.61	35	142.667	48.3333	158.667	37.6667
novel_circ_001216	0	209.587	0	133.869	67.1096	0	1	0	0.666667	0.333333
novel_circ_001217	330.477	0	0	0	0	1	0	0	0	0
novel_circ_001218	542.435	0	424.637	57.8202	134.219	1.66667	0	1.33333	0.333333	0.666667
novel_circ_001219	0	0	0	175.84	0	0	0	0	1	0
novel_circ_001220	421.008	218.245	1004.49	0	194.152	1.33333	1	3.33333	0	1
novel_circ_001221	0	0	177.683	326.351	0	0	0	0.666667	1.66667	0
novel_circ_001222	0	0	0	0	134.219	0	0	0	0	0.666667
novel_circ_001223	0	0	0	117.226	0	0	0	0	0.666667	0
novel_circ_001224	225.225	406.667	178.301	231.281	244.572	0.666667	2	0.666667	1.33333	1.33333
novel_circ_001225	1188.64	363.742	401.856	0	295.77	3.66667	1.66667	1.33333	0	1.66667
novel_circ_001226	435.729	64.0902	467.607	0	633.656	1.33333	0.333333	1.66667	0	3.33333
novel_circ_001227	216.38	0	0	0	0	0.666667	0	0	0	0
novel_circ_001228	337.838	512.722	0	57.8202	591.541	1	2.66667	0	0.333333	3.33333
novel_circ_001229	0	0	0	200.803	0	0	0	0	1	0
novel_circ_001230	0	186.498	0	0	0	0	1	0	0	0
novel_circ_001231	0	124.332	0	0	0	0	0.666667	0	0	0
novel_circ_001232	105.252	0	0	435.256	67.1096	0.333333	0	0	2.33333	0.333333
novel_circ_001233	0	128.18	0	0	0	0	0.666667	0	0	0
novel_circ_001234	315.756	0	0	0	0	1	0	0	0	0
novel_circ_001235	324.57	0	0	0	0	1	0	0	0	0
novel_circ_001236	0	0	0	173.461	0	0	0	0	1	0
novel_circ_001237	0	363.742	267.451	0	0	0	1.66667	1	0	0
novel_circ_001238	653.594	1030.62	0	585.339	1045.05	2	5	0	3.33333	5.33333
novel_circ_001239	0	0	533.049	0	0	0	0	2	0	0
novel_circ_001240	0	0	0	115.64	0	0	0	0	0.666667	0
novel_circ_001241	225.225	0	0	0	0	0.666667	0	0	0	0
novel_circ_001242	0	248.663	0	0	0	0	1.33333	0	0	0
novel_circ_001243	0	265.019	0	117.226	0	0	1.33333	0	0.666667	0
novel_circ_001244	435.729	134.914	559.66	0	0	1.33333	0.666667	1.66667	0	0
novel_circ_001245	318.694	250.588	0	125.548	598.368	1	1.33333	0	0.666667	3
novel_circ_001246	105.252	0	0	0	295.77	0.333333	0	0	0	1.66667
novel_circ_001247	216.38	0	0	0	0	0.666667	0	0	0	0
novel_circ_001248	0	0	0	175.84	0	0	0	0	1	0
novel_circ_001249	210.504	0	0	0	0	0.666667	0	0	0	0
novel_circ_001250	0	0	0	0	335.548	0	0	0	0	1.66667
novel_circ_001251	108.19	0	0	0	134.219	0.333333	0	0	0	0.666667
novel_circ_001252	0	0	0	133.869	0	0	0	0	0.666667	0
novel_circ_001253	0	186.498	89.1504	0	262.82	0	1	0.333333	0	1.33333
novel_circ_001254	108.19	64.0902	781.548	350.093	354.925	0.333333	0.333333	2.66667	2	2
novel_circ_001255	318.694	763.676	356.293	758.8	1402.66	1	3.66667	1.33333	4.33333	7.66667
novel_circ_001256	0	0	0	175.84	0	0	0	0	1	0
novel_circ_001257	842.017	0	0	508.133	456.972	2.66667	0	0	2.66667	2.33333
novel_circ_001258	315.756	218.245	468.225	184.161	201.329	1	1	1.66667	1	1
novel_circ_001259	660.955	601.823	1448.26	183.368	236.616	2	3	5.33333	1	1.33333
novel_circ_001260	0	0	0	133.869	0	0	0	0	0.666667	0
novel_circ_001261	0	0	0	404.741	0	0	0	0	2.33333	0
novel_circ_001262	0	0	0	117.226	0	0	0	0	0.666667	0
novel_circ_001263	0	0	0	117.226	0	0	0	0	0.666667	0
novel_circ_001264	0	0	0	0	335.548	0	0	0	0	1.66667
novel_circ_001265	0	128.18	0	0	0	0	0.666667	0	0	0
novel_circ_001266	112.613	261.17	669.307	0	126.264	0.333333	1.33333	2.33333	0	0.666667
novel_circ_001267	0	0	0	578.202	0	0	0	0	3.33333	0
novel_circ_001268	0	64.0902	0	117.226	0	0	0.333333	0	0.666667	0
novel_circ_001269	324.57	7365.82	379.383	4628.14	10033.3	1	36.3333	1.33333	25.3333	51.6667
novel_circ_001270	0	218.245	0	659.802	0	0	1	0	3.66667	0
novel_circ_001271	315.756	556.013	111.932	0	177.462	1	2.66667	0.333333	0	1
novel_circ_001272	441.605	318.527	445.134	491.49	1447.11	1.33333	1.66667	1.66667	2.66667	7.66667
novel_circ_001273	0	0	0	115.64	0	0	0	0	0.666667	0
novel_circ_001274	3217.15	0	0	173.461	0	9.66667	0	0	1	0
novel_circ_001275	0	0	0	462.561	0	0	0	0	2.66667	0
novel_circ_001276	0	0	0	0	134.219	0	0	0	0	0.666667
novel_circ_001277	0	0	0	0	134.219	0	0	0	0	0.666667
novel_circ_001278	0	0	0	0	335.548	0	0	0	0	1.66667
novel_circ_001279	0	72.7484	0	133.869	118.308	0	0.333333	0	0.666667	0.666667
novel_circ_001280	0	0	0	117.226	0	0	0	0	0.666667	0
novel_circ_001281	0	0	0	0	118.308	0	0	0	0	0.666667
novel_circ_001282	675.676	0	0	0	0	2	0	0	0	0
novel_circ_001283	875.85	451.517	266.833	58.6132	338.664	2.66667	2.33333	1	0.333333	1.66667
novel_circ_001284	0	0	0	0	335.548	0	0	0	0	1.66667
novel_circ_001285	0	751.763	111.932	0	59.1541	0	4	0.333333	0	0.333333
novel_circ_001286	108.19	136.839	88.8415	417.028	505.834	0.333333	0.666667	0.333333	2.33333	2.66667
novel_circ_001287	0	0	0	298.215	0	0	0	0	1.66667	0
novel_circ_001288	0	0	178.301	0	0	0	0	0.666667	0	0
novel_circ_001289	225.225	460.175	177.992	133.869	186.197	0.666667	2.33333	0.666667	0.666667	1
novel_circ_001290	0	0	0	0	118.308	0	0	0	0	0.666667
novel_circ_001291	0	518.492	895.456	0	466.486	0	2.66667	2.66667	0	2.33333
novel_circ_001292	210.504	64.0902	0	0	0	0.666667	0.333333	0	0	0
novel_circ_001293	0	0	445.752	0	0	0	0	1.66667	0	0
novel_circ_001294	0	0	267.451	0	0	0	0	1	0	0
novel_circ_001295	0	320.451	0	0	0	0	1.66667	0	0	0
novel_circ_001296	889.118	62.1659	758.457	0	446.68	2.66667	0.333333	2.66667	0	2.33333
novel_circ_001297	0	0	0	0	203.666	0	0	0	0	1
novel_circ_001298	216.38	425.908	355.675	0	67.8887	0.666667	2	1.33333	0	0.333333
novel_circ_001299	0	0	534.902	0	59.1541	0	0	2	0	0.333333
novel_circ_001300	16739.1	5023.45	14084.6	4590.57	11977.8	51	25.6667	50	24.6667	61.6667
novel_circ_001301	315.756	0	0	0	0	1	0	0	0	0
novel_circ_001302	0	0	0	0	134.219	0	0	0	0	0.666667
novel_circ_001303	112.613	0	223.864	466.527	513.789	0.333333	0	0.666667	2.66667	2.66667
novel_circ_001304	330.477	0	0	133.869	499.436	1	0	0	0.666667	2.66667
novel_circ_001305	0	0	0	0	134.219	0	0	0	0	0.666667
novel_circ_001306	0	0	313.014	200.803	203.666	0	0	1	1	1
novel_circ_001307	105.252	0	0	133.869	339.443	0.333333	0	0	0.666667	1.66667
novel_circ_001308	0	0	0	0	135.777	0	0	0	0	0.666667
novel_circ_001309	225.225	0	0	0	0	0.666667	0	0	0	0
novel_circ_001310	0	0	0	0	135.777	0	0	0	0	0.666667
novel_circ_001311	526.26	0	0	0	0	1.66667	0	0	0	0
novel_circ_001312	0	6417.8	89.1504	4731.5	5361.2	0	32.3333	0.333333	26	27.6667
novel_circ_001313	0	192.271	0	0	0	0	1	0	0	0
novel_circ_001314	0	320.451	0	0	0	0	1.66667	0	0	0
novel_circ_001315	0	320.451	444.825	425.349	876.32	0	1.66667	1.66667	2.33333	4.33333
novel_circ_001316	337.838	0	0	0	0	1	0	0	0	0
novel_circ_001317	0	0	0	0	177.462	0	0	0	0	1
novel_circ_001318	210.504	0	0	0	0	0.666667	0	0	0	0
novel_circ_001319	0	0	0	175.84	0	0	0	0	1	0
novel_circ_001320	0	0	178.301	0	0	0	0	0.666667	0	0
novel_circ_001321	0	0	111.932	0	201.329	0	0	0.333333	0	1
novel_circ_001322	321.632	0	0	0	0	1	0	0	0	0
novel_circ_001323	0	0	0	117.226	0	0	0	0	0.666667	0
novel_circ_001324	105.252	128.18	447.728	301.387	134.219	0.333333	0.666667	1.33333	1.66667	0.666667
novel_circ_001325	105.252	448.632	447.728	886.726	765.538	0.333333	2.33333	1.33333	5	4
novel_circ_001326	0	124.332	0	0	118.308	0	0.666667	0	0	0.666667
novel_circ_001327	0	0	0	0	135.777	0	0	0	0	0.666667
novel_circ_001328	112.613	0	890.886	174.254	811.118	0.333333	0	3.33333	1	4.33333
novel_circ_001329	220.803	261.17	312.705	242.774	522.524	0.666667	1.33333	1	1.33333	2.66667
novel_circ_001330	0	134.914	89.1504	672.479	319.637	0	0.666667	0.333333	3.66667	1.66667
novel_circ_001331	0	646.078	0	58.6132	490.702	0	3	0	0.333333	2.66667
novel_circ_001332	0	0	0	58.6132	134.219	0	0	0	0.333333	0.666667
novel_circ_001333	0	0	0	133.869	0	0	0	0	0.666667	0
novel_circ_001334	210.504	0	0	0	0	0.666667	0	0	0	0
novel_circ_001335	0	64.0902	0	133.869	505.055	0	0.333333	0	0.666667	2.66667
novel_circ_001336	0	0	424.946	0	0	0	0	1.33333	0	0
novel_circ_001337	0	0	447.728	0	59.1541	0	0	1.33333	0	0.333333
novel_circ_001338	434.245	136.839	289.924	251.095	0	1.33333	0.666667	1	1.33333	0
novel_circ_001339	426.884	64.0902	401.547	124.755	59.1541	1.33333	0.333333	1.33333	0.666667	0.333333
novel_circ_001340	2395	4042.26	2386.38	3280.01	4618.32	7.33333	20.3333	8.33333	18	24
novel_circ_001341	324.57	136.839	0	117.226	295.77	1	0.666667	0	0.666667	1.66667
novel_circ_001342	0	282.336	0	582.96	329.151	0	1.33333	0	3.33333	1.66667
novel_circ_001343	0	0	0	174.254	59.1541	0	0	0	1	0.333333
novel_circ_001344	210.504	0	0	57.8202	67.1096	0.666667	0	0	0.333333	0.333333
novel_circ_001345	4761.31	8380.91	4565.99	10663.8	10267.3	14.3333	42.3333	16.3333	59	53.3333
novel_circ_001346	6903.85	9444.47	7474.74	9271.42	10991.4	21.3333	48	25.6667	50	57.3333
novel_circ_001347	217.865	64.0902	0	124.755	303.726	0.666667	0.333333	0	0.666667	1.66667
novel_circ_001348	0	755.017	201.082	884.347	824.692	0	3.66667	0.666667	5	4.33333
novel_circ_001349	0	874.54	424.946	491.49	648.008	0	4.33333	1.33333	2.66667	3.33333
novel_circ_001350	426.884	145.497	0	234.453	0	1.33333	0.666667	0	1.33333	0
novel_circ_001351	328.993	271.753	177.992	538.61	252.527	1	1.33333	0.666667	3	1.33333
novel_circ_001352	112.613	271.753	312.705	291.48	262.041	0.333333	1.33333	1	1.66667	1.33333
novel_circ_001353	112.613	353.16	88.8415	348.507	134.998	0.333333	1.66667	0.333333	2	0.666667
novel_circ_001354	1624.4	2781.62	1070.85	3840.02	2025.32	5	13.6667	3.66667	21	10.3333
novel_circ_001355	0	389.351	88.8415	801.992	321.195	0	2	0.333333	4.33333	1.66667
novel_circ_001356	105.252	218.245	0	365.943	388.305	0.333333	1	0	2	2
novel_circ_001357	108.19	273.677	177.683	116.433	437.945	0.333333	1.33333	0.666667	0.666667	2.33333
novel_circ_001358	216.38	0	0	0	0	0.666667	0	0	0	0
novel_circ_001359	0	0	0	133.869	0	0	0	0	0.666667	0
novel_circ_001360	0	0	0	117.226	0	0	0	0	0.666667	0
novel_circ_001361	0	0	0	0	295.77	0	0	0	0	1.66667
novel_circ_001362	0	0	0	0	203.666	0	0	0	0	1
novel_circ_001363	0	0	0	173.461	0	0	0	0	1	0
novel_circ_001364	225.225	0	0	117.226	0	0.666667	0	0	0.666667	0
novel_circ_001365	112.613	489.998	355.984	360	1595.68	0.333333	2.33333	1.33333	2	8.33333
novel_circ_001366	0	0	0	133.869	0	0	0	0	0.666667	0
novel_circ_001367	0	0	355.366	0	0	0	0	1.33333	0	0
novel_circ_001368	526.26	0	0	0	0	1.66667	0	0	0	0
novel_circ_001369	0	0	513.479	0	127.043	0	0	1.66667	0	0.666667
novel_circ_001370	540.95	0	0	0	0	1.66667	0	0	0	0
novel_circ_001371	216.38	583.546	312.705	1300.22	930.984	0.666667	3	1	7	5
novel_circ_001372	0	0	0	267.738	0	0	0	0	1.33333	0
novel_circ_001373	0	0	177.683	133.869	134.219	0	0	0.666667	0.666667	0.666667
novel_circ_001374	0	0	534.902	0	0	0	0	2	0	0
novel_circ_001375	225.225	0	356.602	133.869	67.8887	0.666667	0	1.33333	0.666667	0.333333
novel_circ_001376	0	0	267.142	374.264	134.219	0	0	1	2	0.666667
novel_circ_001377	865.52	0	0	0	0	2.66667	0	0	0	0
novel_circ_001378	210.504	0	0	117.226	194.931	0.666667	0	0	0.666667	1
novel_circ_001379	0	128.18	1228.35	58.6132	0	0	0.666667	4	0.333333	0
novel_circ_001380	0	0	0	0	271.555	0	0	0	0	1.33333
novel_circ_001381	210.504	254.437	0	175.047	193.373	0.666667	1.33333	0	1	1
novel_circ_001382	324.57	0	0	0	0	1	0	0	0	0
novel_circ_001383	0	145.497	0	0	59.1541	0	0.666667	0	0	0.333333
novel_circ_001384	0	128.18	0	517.247	201.329	0	0.666667	0	2.66667	1
novel_circ_001385	108.19	0	0	58.6132	177.462	0.333333	0	0	0.333333	1
novel_circ_001386	337.838	0	0	0	0	1	0	0	0	0
novel_circ_001387	315.756	0	0	0	0	1	0	0	0	0
novel_circ_001388	0	0	781.239	376.643	67.8887	0	0	2.66667	2	0.333333
novel_circ_001389	213.442	316.602	378.456	241.188	498.657	0.666667	1.66667	1.33333	1.33333	2.66667
novel_circ_001390	0	188.422	0	0	0	0	1	0	0	0
novel_circ_001391	0	0	0	175.84	0	0	0	0	1	0
novel_circ_001392	0	0	0	0	135.777	0	0	0	0	0.666667
novel_circ_001393	0	0	0	58.6132	134.219	0	0	0	0.333333	0.666667
novel_circ_001394	0	0	0	0	134.219	0	0	0	0	0.666667
novel_circ_001395	105.252	0	0	365.15	252.527	0.333333	0	0	2	1.33333
novel_circ_001396	105.252	0	0	499.018	461.812	0.333333	0	0	2.66667	2.33333
novel_circ_001397	216.38	0	0	117.226	0	0.666667	0	0	0.666667	0
novel_circ_001398	0	0	0	480.79	194.931	0	0	0	2.66667	1
novel_circ_001399	0	145.497	0	0	0	0	0.666667	0	0	0
novel_circ_001400	0	0	177.683	0	0	0	0	0.666667	0	0
novel_circ_001401	0	0	0	173.461	0	0	0	0	1	0
novel_circ_001402	0	192.271	0	0	0	0	1	0	0	0
novel_circ_001403	0	62.1659	0	0	583.236	0	0.333333	0	0	3
novel_circ_001404	0	128.18	0	0	0	0	0.666667	0	0	0
novel_circ_001405	337.838	0	0	0	0	1	0	0	0	0
novel_circ_001406	773.567	0	444.516	0	0	2.33333	0	1.66667	0	0
novel_circ_001407	0	0	0	234.453	0	0	0	0	1.33333	0
novel_circ_001408	321.632	464.024	514.097	510.512	456.193	1	2.33333	1.66667	2.66667	2.33333
novel_circ_001409	2340.53	984.44	1670.89	722.771	2158.33	7.33333	5	6	4	11.3333
novel_circ_001410	0	0	0	115.64	0	0	0	0	0.666667	0
novel_circ_001411	0	186.498	223.864	347.714	497.099	0	1	0.666667	2	2.66667
novel_circ_001412	0	0	0	117.226	201.329	0	0	0	0.666667	1
novel_circ_001413	0	372.995	0	0	0	0	2	0	0	0
novel_circ_001414	0	0	0	0	201.329	0	0	0	0	1
novel_circ_001415	0	0	0	117.226	0	0	0	0	0.666667	0
novel_circ_001416	0	0	0	117.226	0	0	0	0	0.666667	0
novel_circ_001417	0	256.361	0	0	0	0	1.33333	0	0	0
novel_circ_001418	0	0	0	346.921	0	0	0	0	2	0
novel_circ_001419	0	704.993	0	290.687	260.483	0	3.66667	0	1.66667	1.33333
novel_circ_001420	225.225	0	0	0	0	0.666667	0	0	0	0
novel_circ_001421	0	0	0	0	134.219	0	0	0	0	0.666667
novel_circ_001422	853.768	522.341	0	918.425	3243.34	2.66667	2.66667	0	5	17
novel_circ_001423	450.45	0	0	0	0	1.33333	0	0	0	0
novel_circ_001424	0	128.18	0	0	0	0	0.666667	0	0	0
novel_circ_001425	0	0	447.728	0	0	0	0	1.33333	0	0
novel_circ_001426	435.729	907.843	799.574	484.755	202.887	1.33333	4.66667	3	2.66667	1
novel_circ_001427	0	0	0	293.066	0	0	0	0	1.66667	0
novel_circ_001428	0	342.577	1608.35	182.575	118.308	0	1.66667	5.33333	1	0.666667
novel_circ_001429	2982.31	764.27	2582.4	1956.09	1460.68	9.33333	4	9.33333	10.3333	7.66667
novel_circ_001430	105.252	0	0	465.734	67.1096	0.333333	0	0	2.66667	0.333333
novel_circ_001431	0	124.332	0	232.867	0	0	0.666667	0	1.33333	0
novel_circ_001432	0	0	0	133.869	0	0	0	0	0.666667	0
novel_circ_001433	112.613	0	356.602	0	0	0.333333	0	1.33333	0	0
novel_circ_001434	0	0	0	0	135.777	0	0	0	0	0.666667
novel_circ_001435	0	0	88.8415	175.84	0	0	0	0.333333	1	0
novel_circ_001436	423.946	280.411	267.142	543.368	0	1.33333	1.33333	1	3	0
novel_circ_001437	0	0	0	0	177.462	0	0	0	0	1
novel_circ_001438	0	0	0	0	134.219	0	0	0	0	0.666667
novel_circ_001439	975.226	1497.16	379.074	626.945	576.06	3	7.66667	1.33333	3.33333	3
novel_circ_001440	660.955	926.123	1515.99	1514.86	715.897	2	4.66667	5.33333	8.33333	3.66667
novel_circ_001441	5387.61	12041.1	6643.92	12601.3	13140.1	16.6667	61	23	69	67.6667
novel_circ_001442	0	0	0	58.6132	135.777	0	0	0	0.333333	0.666667
novel_circ_001443	0	0	0	117.226	271.555	0	0	0	0.666667	1.33333
novel_circ_001444	421.008	0	0	0	59.1541	1.33333	0	0	0	0.333333
novel_circ_001445	4210.69	3676	5151.64	2700.22	2238.5	13	18.3333	17.6667	14.6667	11.3333
novel_circ_001446	0	0	0	133.869	0	0	0	0	0.666667	0
novel_circ_001447	0	124.332	0	0	0	0	0.666667	0	0	0
novel_circ_001448	0	401.858	88.8415	0	194.152	0	2	0.333333	0	1
novel_circ_001449	323.117	136.839	891.504	299.801	690.473	1	0.666667	3.33333	1.66667	3.66667
novel_circ_001450	225.225	256.361	88.8415	58.6132	126.264	0.666667	1.33333	0.333333	0.333333	0.666667
novel_circ_001451	0	0	0	234.453	0	0	0	0	1.33333	0
novel_circ_001452	0	0	335.796	0	0	0	0	1	0	0
novel_circ_001453	0	128.18	89.1504	175.047	252.527	0	0.666667	0.333333	1	1.33333
novel_circ_001454	0	124.332	0	0	0	0	0.666667	0	0	0
novel_circ_001455	0	124.332	0	0	0	0	0.666667	0	0	0
novel_circ_001456	0	796.018	0	357.621	396.26	0	4	0	2	2
novel_circ_001457	0	124.332	0	117.226	0	0	0.666667	0	0.666667	0
novel_circ_001458	0	0	178.301	66.9344	67.1096	0	0	0.666667	0.333333	0.333333
novel_circ_001459	0	0	0	175.84	0	0	0	0	1	0
novel_circ_001460	0	355.084	89.1504	422.97	473.662	0	1.66667	0.333333	2.33333	2.33333
novel_circ_001461	7131.32	9234.28	7132.03	8162.03	8348.55	21.6667	46.6667	25	44.6667	43
novel_circ_001462	105.252	0	0	117.226	236.616	0.333333	0	0	0.666667	1.33333
novel_circ_001463	0	0	0	0	118.308	0	0	0	0	0.666667
novel_circ_001464	216.38	0	0	0	405.774	0.666667	0	0	0	2
novel_circ_001465	0	136.839	177.683	736.278	135.777	0	0.666667	0.666667	3.66667	0.666667
novel_circ_001466	1292.44	327.185	1517.66	426.142	516.127	4	1.66667	5	2.33333	2.66667
novel_circ_001467	315.756	0	625.72	66.9344	59.1541	1	0	2	0.333333	0.333333
novel_circ_001468	321.632	0	468.225	251.095	262.041	1	0	1.66667	1.33333	1.33333
novel_circ_001469	536.559	0	622.508	192.482	67.8887	1.66667	0	2.33333	1	0.333333
novel_circ_001470	0	0	0	0	177.462	0	0	0	0	1
novel_circ_001471	0	0	0	117.226	0	0	0	0	0.666667	0
novel_circ_001472	0	128.18	0	0	0	0	0.666667	0	0	0
novel_circ_001473	0	128.18	0	0	0	0	0.666667	0	0	0
novel_circ_001474	321.632	353.16	0	232.867	532.038	1	1.66667	0	1.33333	2.66667
novel_circ_001475	450.45	692.852	691.162	57.8202	548.298	1.33333	3.33333	2.33333	0.333333	3
novel_circ_001476	321.632	192.271	177.683	0	304.505	1	1	0.666667	0	1.66667
novel_circ_001477	0	0	0	0	271.555	0	0	0	0	1.33333
novel_circ_001478	210.504	0	0	0	0	0.666667	0	0	0	0
novel_circ_001479	772.082	841.233	780.621	191.689	1293.09	2.33333	4	2.66667	1	7
novel_circ_001480	105.252	188.422	0	117.226	0	0.333333	1	0	0.666667	0
novel_circ_001481	105.252	0	89.1504	301.387	67.8887	0.333333	0	0.333333	1.66667	0.333333
novel_circ_001482	0	0	0	234.453	0	0	0	0	1.33333	0
novel_circ_001483	337.838	72.7484	89.1504	66.9344	0	1	0.333333	0.333333	0.333333	0
novel_circ_001484	333.415	0	0	66.9344	0	1	0	0	0.333333	0
novel_circ_001485	337.838	0	0	0	0	1	0	0	0	0
novel_circ_001486	108.19	0	111.932	192.482	201.329	0.333333	0	0.333333	1	1
novel_circ_001487	637.388	200.929	266.525	531.082	774.272	2	1	1	3	4
novel_circ_001488	637.388	512.722	0	483.962	177.462	2	2.66667	0	2.66667	1
novel_circ_001489	1191.61	477.491	735.676	713.657	607.103	3.66667	2.33333	2.66667	4	3
novel_circ_001490	0	0	0	0	354.925	0	0	0	0	2
novel_circ_001491	0	0	0	234.453	0	0	0	0	1.33333	0
novel_circ_001492	0	0	356.602	0	0	0	0	1.33333	0	0
novel_circ_001493	0	218.245	0	0	0	0	1	0	0	0
novel_circ_001494	0	0	0	0	337.885	0	0	0	0	1.66667
novel_circ_001495	0	0	0	0	135.777	0	0	0	0	0.666667
novel_circ_001496	0	145.497	0	0	0	0	0.666667	0	0	0
novel_circ_001497	105.252	128.18	533.049	66.9344	127.043	0.333333	0.666667	2	0.333333	0.666667
novel_circ_001498	0	248.663	0	0	0	0	1.33333	0	0	0
novel_circ_001499	1522.05	1087.61	981.395	1674.44	1577.86	4.66667	5.66667	3.33333	9.33333	8
novel_circ_001500	0	0	0	234.453	0	0	0	0	1.33333	0
novel_circ_001501	0	0	0	350.886	0	0	0	0	2	0
novel_circ_001502	324.57	273.677	0	367.529	700.765	1	1.33333	0	2	3.66667
novel_circ_001503	0	0	0	115.64	0	0	0	0	0.666667	0
novel_circ_001504	0	0	0	346.921	118.308	0	0	0	2	0.666667
novel_circ_001505	324.57	0	177.683	191.689	354.925	1	0	0.666667	1	2
novel_circ_001506	671.253	695.371	1156.79	592.074	321.195	2	3.66667	4.33333	3.33333	1.66667
novel_circ_001507	1628.79	1368.02	2160.66	1293.48	1630.62	5	7	7.66667	7	8.33333
novel_circ_001508	0	0	0	175.84	0	0	0	0	1	0
novel_circ_001509	0	380.693	0	117.226	0	0	2	0	0.666667	0
novel_circ_001510	0	128.18	0	0	0	0	0.666667	0	0	0
novel_circ_001511	0	290.994	0	0	0	0	1.33333	0	0	0
novel_circ_001512	432.76	0	0	0	0	1.33333	0	0	0	0
novel_circ_001513	105.252	64.0902	89.1504	173.461	134.219	0.333333	0.333333	0.333333	1	0.666667
novel_circ_001514	0	0	0	0	1086.22	0	0	0	0	5.33333
novel_circ_001515	0	0	0	0	134.219	0	0	0	0	0.666667
novel_circ_001516	0	0	0	0	135.777	0	0	0	0	0.666667
novel_circ_001517	105.252	0	177.683	251.095	449.017	0.333333	0	0.666667	1.33333	2.33333
novel_circ_001518	225.225	0	0	0	0	0.666667	0	0	0	0
novel_circ_001519	0	0	0	0	203.666	0	0	0	0	1
novel_circ_001520	0	0	0	0	271.555	0	0	0	0	1.33333
novel_circ_001521	108.19	0	0	175.84	303.726	0.333333	0	0	1	1.66667
novel_circ_001522	0	0	0	173.461	0	0	0	0	1	0
novel_circ_001523	0	363.742	0	0	0	0	1.66667	0	0	0
novel_circ_001524	108.19	0	402.165	0	386.747	0.333333	0	1.33333	0	2
novel_circ_001525	0	0	0	173.461	0	0	0	0	1	0
novel_circ_001526	0	290.994	0	0	0	0	1.33333	0	0	0
novel_circ_001527	0	0	0	231.281	0	0	0	0	1.33333	0
novel_circ_001528	0	273.677	559.66	117.226	516.127	0	1.33333	1.66667	0.666667	2.66667
novel_circ_001529	0	0	0	0	201.329	0	0	0	0	1
novel_circ_001530	0	0	0	66.9344	118.308	0	0	0	0.333333	0.666667
novel_circ_001531	0	256.361	0	0	0	0	1.33333	0	0	0
novel_circ_001532	0	0	0	117.226	0	0	0	0	0.666667	0
novel_circ_001533	0	372.995	178.301	232.867	236.616	0	2	0.666667	1.33333	1.33333
novel_circ_001534	450.45	0	0	173.461	67.8887	1.33333	0	0	1	0.333333
novel_circ_001535	0	0	0	346.921	0	0	0	0	2	0
novel_circ_001536	0	0	177.683	0	0	0	0	0.666667	0	0
novel_circ_001537	0	128.18	0	346.921	402.658	0	0.666667	0	2	2
novel_circ_001538	213.442	64.0902	756.913	66.9344	312.461	0.666667	0.333333	2.66667	0.333333	1.66667
novel_circ_001539	225.225	0	0	0	0	0.666667	0	0	0	0
novel_circ_001540	105.252	207.663	200.773	184.161	202.887	0.333333	1	0.666667	1	1
novel_circ_001541	0	190.346	356.602	58.6132	59.1541	0	1	1.33333	0.333333	0.333333
novel_circ_001542	875.85	329.109	0	659.802	656.743	2.66667	1.66667	0	3.66667	3.33333
novel_circ_001543	1416.83	314.678	0	582.96	194.152	4.33333	1.66667	0	3.33333	1
novel_circ_001544	0	128.18	0	58.6132	67.1096	0	0.666667	0	0.333333	0.333333
novel_circ_001545	450.45	0	0	117.226	134.219	1.33333	0	0	0.666667	0.666667
novel_circ_001546	0	145.497	0	0	0	0	0.666667	0	0	0
novel_circ_001547	0	0	223.864	117.226	0	0	0	0.666667	0.666667	0
novel_circ_001548	0	0	0	117.226	0	0	0	0	0.666667	0
novel_circ_001549	0	0	0	133.869	0	0	0	0	0.666667	0
novel_circ_001550	0	0	0	115.64	0	0	0	0	0.666667	0
novel_circ_001551	0	218.245	0	0	0	0	1	0	0	0
novel_circ_001552	0	124.332	0	0	0	0	0.666667	0	0	0
novel_circ_001553	0	0	223.864	0	0	0	0	0.666667	0	0
novel_circ_001554	0	128.18	0	0	431.548	0	0.666667	0	0	2.33333
novel_circ_001555	225.225	0	0	58.6132	193.373	0.666667	0	0	0.333333	1
novel_circ_001556	0	0	0	115.64	0	0	0	0	0.666667	0
novel_circ_001557	0	128.18	0	0	0	0	0.666667	0	0	0
novel_circ_001558	225.225	0	0	0	0	0.666667	0	0	0	0
novel_circ_001559	225.225	0	0	0	0	0.666667	0	0	0	0
novel_circ_001560	0	436.491	0	0	0	0	2	0	0	0
novel_circ_001561	216.38	128.18	0	652.702	268.438	0.666667	0.666667	0	3.33333	1.33333
novel_circ_001562	0	72.7484	0	173.461	648.008	0	0.333333	0	1	3.33333
novel_circ_001563	216.38	999.832	111.932	424.556	708.721	0.666667	5	0.333333	2.33333	3.66667
novel_circ_001564	0	128.18	178.301	0	0	0	0.666667	0.666667	0	0
novel_circ_001565	446.028	0	355.984	865.754	339.443	1.33333	0	1.33333	4.66667	1.66667
novel_circ_001566	0	0	201.082	117.226	59.1541	0	0	0.666667	0.666667	0.333333
novel_circ_001567	0	0	88.8415	58.6132	252.527	0	0	0.333333	0.333333	1.33333
novel_circ_001568	324.57	0	0	0	0	1	0	0	0	0
novel_circ_001569	0	0	178.301	0	0	0	0	0.666667	0	0
novel_circ_001570	421.008	64.0902	0	0	0	1.33333	0.333333	0	0	0
novel_circ_001571	225.225	134.914	0	116.433	186.197	0.666667	0.666667	0	0.666667	1
novel_circ_001572	0	0	0	115.64	0	0	0	0	0.666667	0
novel_circ_001573	0	64.0902	0	298.215	0	0	0.333333	0	1.66667	0
novel_circ_001574	428.369	0	0	231.281	236.616	1.33333	0	0	1.33333	1.33333
novel_circ_001575	526.26	207.663	177.992	58.6132	186.197	1.66667	1	0.666667	0.333333	1
novel_circ_001576	4352.78	321.412	1940.63	249.509	271.555	13.3333	1.66667	6.66667	1.33333	1.33333
novel_circ_001577	3319.43	1050.82	2809.78	240.395	327.592	10	5	9.66667	1.33333	1.66667
novel_circ_001578	736.765	145.497	826.802	66.9344	0	2.33333	0.666667	2.66667	0.333333	0
novel_circ_001579	0	0	0	0	236.616	0	0	0	0	1.33333
novel_circ_001580	0	0	0	0	236.616	0	0	0	0	1.33333
novel_circ_001581	0	0	267.451	0	0	0	0	1	0	0
novel_circ_001582	1526.51	0	379.383	521.175	67.1096	4.66667	0	1.33333	3	0.333333
novel_circ_001583	0	0	0	0	268.438	0	0	0	0	1.33333
novel_circ_001584	637.388	321.412	312.705	0	67.8887	2	1.66667	1	0	0.333333
novel_circ_001585	213.442	72.7484	981.703	0	203.666	0.666667	0.333333	3.33333	0	1
novel_circ_001586	0	145.497	89.1504	0	203.666	0	0.666667	0.333333	0	1
novel_circ_001587	0	0	0	0	134.219	0	0	0	0	0.666667
novel_circ_001588	662.408	0	2742.79	117.226	313.24	2	0	9.33333	0.666667	1.66667
novel_circ_001589	105.252	62.1659	289.615	0	0	0.333333	0.333333	1	0	0
novel_circ_001590	0	465.948	0	316.444	244.572	0	2.33333	0	1.66667	1.33333
novel_circ_001591	0	435.161	0	401.606	268.438	0	2.33333	0	2	1.33333
novel_circ_001592	0	145.497	0	334.672	0	0	0.666667	0	1.66667	0
novel_circ_001593	446.028	988.289	0	607.924	911.608	1.33333	5	0	3.33333	4.66667
novel_circ_001594	0	0	290.233	0	0	0	0	1	0	0
novel_circ_001595	788.288	72.7484	200.773	57.8202	270.776	2.33333	0.333333	0.666667	0.333333	1.33333
novel_circ_001596	0	0	223.864	66.9344	67.1096	0	0	0.666667	0.333333	0.333333
novel_circ_001597	869.974	207.663	1894.14	258.623	449.017	2.66667	1	6.66667	1.33333	2.33333
novel_circ_001598	978.164	207.663	1715.53	258.623	389.863	3	1	6	1.33333	2
novel_circ_001599	3656.47	3449.09	4973.03	3945.72	2587.03	11.3333	17.3333	17	22	13.3333
novel_circ_001600	3229.59	3324.76	4884.19	3945.72	2519.14	10	16.6667	16.6667	22	13
novel_circ_001601	225.225	0	0	426.935	0	0.666667	0	0	2.33333	0
novel_circ_001602	330.477	62.1659	223.864	0	329.93	1	0.333333	0.666667	0	1.66667
novel_circ_001603	0	145.497	0	0	0	0	0.666667	0	0	0
novel_circ_001604	0	0	0	117.226	0	0	0	0	0.666667	0
novel_circ_001605	210.504	192.271	177.683	66.9344	127.043	0.666667	1	0.666667	0.333333	0.666667
novel_circ_001606	450.45	0	0	0	0	1.33333	0	0	0	0
novel_circ_001607	0	0	177.683	175.047	0	0	0	0.666667	1	0
novel_circ_001608	112.613	134.914	715.179	124.755	127.043	0.333333	0.666667	2.33333	0.666667	0.666667
novel_circ_001609	2267.66	1154.95	1673.17	518.04	1437.25	7	5.66667	5.66667	2.66667	7.33333
novel_circ_001610	0	0	0	0	177.462	0	0	0	0	1
novel_circ_001611	0	0	223.864	0	0	0	0	0.666667	0	0
novel_circ_001612	0	0	0	0	236.616	0	0	0	0	1.33333
novel_circ_001613	0	62.1659	313.014	0	0	0	0.333333	1	0	0
novel_circ_001614	225.225	0	0	267.738	0	0.666667	0	0	1.33333	0
novel_circ_001615	225.225	0	0	133.869	0	0.666667	0	0	0.666667	0
novel_circ_001616	323.117	124.332	801.736	0	67.8887	1	0.666667	3	0	0.333333
novel_circ_001617	105.252	188.422	223.864	0	186.197	0.333333	1	0.666667	0	1
novel_circ_001618	105.252	134.914	355.984	57.8202	0	0.333333	0.666667	1.33333	0.333333	0
novel_circ_001619	0	0	0	0	271.555	0	0	0	0	1.33333
novel_circ_001620	105.252	0	223.864	125.548	0	0.333333	0	0.666667	0.666667	0
novel_circ_001621	0	145.497	0	0	0	0	0.666667	0	0	0
novel_circ_001622	210.504	190.346	0	133.869	271.555	0.666667	1	0	0.666667	1.33333
novel_circ_001623	315.756	0	0	0	0	1	0	0	0	0
novel_circ_001624	324.57	192.271	89.1504	0	0	1	1	0.333333	0	0
novel_circ_001625	0	248.663	0	0	0	0	1.33333	0	0	0
novel_circ_001626	0	0	0	0	201.329	0	0	0	0	1
novel_circ_001627	321.632	0	111.932	66.9344	118.308	1	0	0.333333	0.333333	0.666667
novel_circ_001628	112.613	62.1659	711.041	307.329	134.998	0.333333	0.333333	2.66667	1.66667	0.666667
novel_circ_001629	112.613	62.1659	111.932	0	135.777	0.333333	0.333333	0.333333	0	0.666667
novel_circ_001630	1557.43	425.908	2294.45	600.395	329.151	4.66667	2	8	3.33333	1.66667
novel_circ_001631	0	0	0	0	134.219	0	0	0	0	0.666667
novel_circ_001632	5763.76	6578.69	6557.24	5466.23	4449.24	17.6667	33	22.6667	29.3333	22.6667
novel_circ_001633	112.613	0	490.697	0	67.8887	0.333333	0	1.66667	0	0.333333
novel_circ_001634	105.252	0	447.728	0	0	0.333333	0	1.33333	0	0
novel_circ_001635	216.38	0	491.315	58.6132	0	0.666667	0	1.66667	0.333333	0
novel_circ_001636	533.621	209.587	1449	289.894	473.662	1.66667	1	5	1.66667	2.33333

## Sheet: Table S2
Table S2. Detail of circRNAs identified in this study.
id	source_gene	chr	strand	genomic_start	genomic_end	spliced_length	annot_type
novel_circ_000001	Bra011855	A01	+	216255	220150	3896	antisense
novel_circ_000002	Bra011828	A01	-	346055	346493	439	antisense
novel_circ_000003	Bra011820	A01	+	381857	382180	324	one_exon
novel_circ_000004	NA	A01	-	393630	393900	271	intergenic
novel_circ_000005	Bra011776	A01	+	608267	608704	338	exon_intron
novel_circ_000006	Bra011765	A01	+	667289	675850	8393	exon_intron
novel_circ_000007	Bra011736	A01	-	820765	821054	203	annot_exons
novel_circ_000008	Bra011706	A01	-	953517	953829	313	antisense
novel_circ_000009	Bra011701	A01	+	978967	979439	329	annot_exons
novel_circ_000010	Bra011688	A01	+	1054749	1055114	366	one_exon
novel_circ_000011	Bra011668	A01	-	1153908	1154369	462	antisense
novel_circ_000012	Bra011627	A01	-	1355926	1356159	234	exon_intron
novel_circ_000013	Bra011529	A01	-	1811588	1811950	363	one_exon
novel_circ_000014	Bra011529	A01	-	1811648	1811962	315	one_exon
novel_circ_000015	Bra011524	A01	-	1829513	1829698	186	one_exon
novel_circ_000016	Bra011476	A01	+	2024959	2025183	225	one_exon
novel_circ_000017	Bra011467	A01	+	2055651	2064972	8012	exon_intron
novel_circ_000018	Bra011449	A01	+	2126089	2126387	299	antisense
novel_circ_000019	Bra011405	A01	-	2314469	2314802	334	antisense
novel_circ_000020	NA	A01	+	2603230	2604185	956	intergenic
novel_circ_000021	Bra011343	A01	+	2650257	2650475	219	antisense
novel_circ_000022	Bra011343	A01	+	2650260	2650475	216	antisense
novel_circ_000023	Bra011338	A01	-	2664154	2664390	237	exon_intron
novel_circ_000024	Bra011315	A01	+	2760347	2760540	194	antisense
novel_circ_000025	Bra011250	A01	+	3083238	3083411	174	one_exon
novel_circ_000026	Bra011236	A01	-	3156249	3156467	219	one_exon
novel_circ_000027	Bra011217	A01	-	3259061	3301106	41491	exon_intron
novel_circ_000028	Bra011212	A01	+	3261519	3303955	42437	exon_intron
novel_circ_000029	Bra011212	A01	+	3262685	3305059	42375	exon_intron
novel_circ_000030	Bra011217	A01	-	3262685	3305059	41820	exon_intron
novel_circ_000031	NA	A01	+	3278927	3279152	226	intergenic
novel_circ_000032	Bra011203	A01	-	3348902	3349115	214	antisense
novel_circ_000033	Bra011203	A01	-	3348907	3349189	283	antisense
novel_circ_000034	Bra011203	A01	-	3348912	3349201	290	antisense
novel_circ_000035	Bra011203	A01	-	3348917	3349204	288	antisense
novel_circ_000036	Bra011203	A01	-	3348938	3349117	180	antisense
novel_circ_000037	Bra011203	A01	-	3348938	3349159	222	antisense
novel_circ_000038	Bra011203	A01	+	3348940	3349174	235	one_exon
novel_circ_000039	Bra011203	A01	+	3348947	3349128	182	one_exon
novel_circ_000040	Bra011203	A01	-	3348958	3349111	154	antisense
novel_circ_000041	Bra011203	A01	+	3348988	3349171	184	one_exon
novel_circ_000042	Bra011189	A01	+	3414344	3414502	159	antisense
novel_circ_000043	Bra011135	A01	-	3731122	3732305	1184	exon_intron
novel_circ_000044	Bra011062	A01	+	4143306	4161424	18119	antisense
novel_circ_000045	Bra011039	A01	-	4287935	4292401	4467	exon_intron
novel_circ_000046	Bra011039	A01	+	4292238	4292388	151	antisense
novel_circ_000047	Bra040173	A01	-	4466661	4467583	741	exon_intron
novel_circ_000048	Bra040176	A01	+	4502246	4502409	164	antisense
novel_circ_000049	Bra013282	A01	+	4736025	4736190	166	antisense
novel_circ_000050	Bra013339	A01	+	5086967	5087191	225	antisense
novel_circ_000051	Bra013370	A01	+	5258727	5259584	500	annot_exons
novel_circ_000052	Bra013445	A01	-	5705831	5706086	256	antisense
novel_circ_000053	Bra013450	A01	-	5754198	5754371	174	antisense
novel_circ_000054	Bra013452	A01	+	5766295	5766604	310	exon_intron
novel_circ_000055	Bra013497	A01	+	5991933	5994502	2570	antisense
novel_circ_000056	Bra013528	A01	-	6158485	6158704	220	antisense
novel_circ_000057	Bra013576	A01	-	6435083	6435541	295	annot_exons
novel_circ_000058	Bra013576	A01	+	6435083	6435541	459	antisense
novel_circ_000059	Bra013579	A01	+	6445363	6445581	219	antisense
novel_circ_000060	Bra013579	A01	-	6445363	6445598	236	exon_intron
novel_circ_000061	Bra013579	A01	-	6445363	6445602	240	exon_intron
novel_circ_000062	Bra013579	A01	-	6445363	6445614	252	exon_intron
novel_circ_000063	Bra013579	A01	+	6445363	6445621	259	antisense
novel_circ_000064	Bra013579	A01	-	6445363	6445621	259	exon_intron
novel_circ_000065	Bra013579	A01	-	6445363	6445624	262	exon_intron
novel_circ_000066	Bra013579	A01	-	6445363	6445641	279	exon_intron
novel_circ_000067	Bra013579	A01	-	6445363	6445643	281	exon_intron
novel_circ_000068	Bra013579	A01	-	6445363	6445646	284	exon_intron
novel_circ_000069	Bra013579	A01	-	6445363	6445650	288	exon_intron
novel_circ_000070	Bra013579	A01	+	6445363	6445655	293	antisense
novel_circ_000071	Bra013579	A01	-	6445363	6445655	293	exon_intron
novel_circ_000072	Bra013579	A01	-	6445363	6445660	298	exon_intron
novel_circ_000073	Bra013579	A01	+	6445363	6445660	298	antisense
novel_circ_000074	Bra013579	A01	-	6445363	6445662	300	exon_intron
novel_circ_000075	Bra013579	A01	+	6445363	6445670	308	antisense
novel_circ_000076	Bra013579	A01	-	6445363	6445672	310	exon_intron
novel_circ_000077	Bra013579	A01	+	6445363	6445672	310	antisense
novel_circ_000078	Bra013579	A01	-	6445363	6445680	318	exon_intron
novel_circ_000079	Bra013579	A01	-	6445363	6445681	319	exon_intron
novel_circ_000080	Bra013579	A01	-	6445363	6445686	324	exon_intron
novel_circ_000081	Bra013579	A01	+	6445363	6445686	324	antisense
novel_circ_000082	Bra013579	A01	-	6445363	6445697	335	exon_intron
novel_circ_000083	Bra013579	A01	+	6445363	6445697	335	antisense
novel_circ_000084	Bra013579	A01	+	6445363	6445703	341	antisense
novel_circ_000085	Bra013579	A01	+	6445363	6445709	347	antisense
novel_circ_000086	Bra013579	A01	+	6445363	6445713	351	antisense
novel_circ_000087	Bra013579	A01	+	6445363	6445715	353	antisense
novel_circ_000088	Bra013579	A01	-	6445363	6445724	362	exon_intron
novel_circ_000089	Bra013579	A01	+	6445363	6445724	362	antisense
novel_circ_000090	Bra013579	A01	-	6445363	6445730	368	exon_intron
novel_circ_000091	Bra013579	A01	+	6445363	6445730	368	antisense
novel_circ_000092	Bra013579	A01	+	6445363	6445738	376	antisense
novel_circ_000093	Bra013579	A01	+	6445363	6445739	377	antisense
novel_circ_000094	Bra013579	A01	+	6445363	6445746	384	antisense
novel_circ_000095	Bra013579	A01	+	6445363	6445748	386	antisense
novel_circ_000096	Bra013579	A01	-	6445363	6445748	386	exon_intron
novel_circ_000097	Bra013579	A01	+	6445363	6445752	390	antisense
novel_circ_000098	Bra013579	A01	+	6445363	6445754	392	antisense
novel_circ_000099	Bra013579	A01	-	6445363	6445761	399	exon_intron
novel_circ_000100	Bra013579	A01	+	6445363	6445761	399	antisense
novel_circ_000101	Bra013579	A01	-	6445363	6445769	407	exon_intron
novel_circ_000102	Bra013579	A01	+	6445363	6445769	407	antisense
novel_circ_000103	Bra013579	A01	+	6445363	6445775	413	antisense
novel_circ_000104	Bra013579	A01	+	6445363	6445776	414	antisense
novel_circ_000105	Bra013579	A01	+	6445363	6445784	422	antisense
novel_circ_000106	Bra013579	A01	-	6445363	6445784	422	exon_intron
novel_circ_000107	Bra013579	A01	+	6445363	6445790	428	antisense
novel_circ_000108	Bra013579	A01	-	6445363	6445793	431	exon_intron
novel_circ_000109	Bra013579	A01	+	6445363	6445793	431	antisense
novel_circ_000110	Bra013579	A01	-	6445363	6445796	434	exon_intron
novel_circ_000111	Bra013579	A01	+	6445363	6445796	434	antisense
novel_circ_000112	Bra013579	A01	-	6445363	6445808	446	exon_intron
novel_circ_000113	Bra013579	A01	+	6445363	6445808	446	antisense
novel_circ_000114	Bra013579	A01	+	6445363	6445817	455	antisense
novel_circ_000115	Bra013579	A01	+	6445363	6445822	460	antisense
novel_circ_000116	Bra013579	A01	+	6445363	6445828	466	antisense
novel_circ_000117	Bra013579	A01	+	6445363	6445874	512	antisense
novel_circ_000118	Bra013579	A01	+	6445363	6446025	663	antisense
novel_circ_000119	Bra013579	A01	+	6445406	6445668	263	antisense
novel_circ_000120	Bra013579	A01	+	6445727	6445965	239	antisense
novel_circ_000121	Bra013608	A01	+	6623728	6632047	7951	exon_intron
novel_circ_000122	Bra013632	A01	+	6757661	6757822	162	one_exon
novel_circ_000123	Bra013634	A01	+	6776707	6777195	489	one_exon
novel_circ_000124	Bra013676	A01	-	7072813	7073004	192	one_exon
novel_circ_000125	Bra013681	A01	+	7094746	7103500	1893	annot_exons
novel_circ_000126	Bra013681	A01	+	7094746	7111412	9491	exon_intron
novel_circ_000127	Bra013681	A01	+	7094746	7128789	26868	exon_intron
novel_circ_000128	Bra013681	A01	+	7095054	7103819	1904	exon_intron
novel_circ_000129	Bra013684	A01	-	7132795	7136873	1805	exon_intron
novel_circ_000130	Bra013707	A01	+	7291027	7291258	232	antisense
novel_circ_000131	Bra013715	A01	+	7368523	7368795	273	one_exon
novel_circ_000132	Bra013717	A01	-	7372461	7373162	702	antisense
novel_circ_000133	Bra013774	A01	-	7722323	7722727	405	one_exon
novel_circ_000134	Bra013799	A01	+	7806152	7807030	454	annot_exons
novel_circ_000135	Bra013836	A01	+	8022096	8022472	377	one_exon
novel_circ_000136	Bra013865	A01	-	8140689	8140868	180	one_exon
novel_circ_000137	Bra013900	A01	+	8373735	8373893	159	exon_intron
novel_circ_000138	Bra013903	A01	-	8390220	8390371	152	antisense
novel_circ_000139	Bra013903	A01	+	8390220	8390371	152	one_exon
novel_circ_000140	Bra013952	A01	-	8678770	8679359	590	antisense
novel_circ_000141	Bra026257	A01	+	10135105	10144611	8858	exon_intron
novel_circ_000142	Bra026237	A01	+	10268764	10268975	212	exon_intron
novel_circ_000143	Bra038489	A01	+	10712782	10713186	405	one_exon
novel_circ_000144	Bra033547	A01	+	11023857	11024084	228	one_exon
novel_circ_000145	Bra033513	A01	+	11288164	11288712	549	antisense
novel_circ_000146	Bra039563	A01	+	11714861	11715022	162	antisense
novel_circ_000147	Bra040695	A01	-	11825412	11825791	380	one_exon
novel_circ_000148	Bra036921	A01	+	11899223	11899589	367	antisense
novel_circ_000149	Bra036921	A01	+	11900009	11900314	306	antisense
novel_circ_000150	NA	A01	+	11901327	11901964	638	intergenic
novel_circ_000151	Bra036869	A01	+	12368960	12369091	132	one_exon
novel_circ_000152	Bra037608	A01	-	12650779	12655791	1353	exon_intron
novel_circ_000153	Bra033813	A01	+	13402235	13402388	154	one_exon
novel_circ_000154	Bra033805	A01	+	13459988	13463501	3514	antisense
novel_circ_000155	Bra033804	A01	+	13459988	13467373	7386	exon_intron
novel_circ_000156	NA	A01	-	13550153	13555784	5632	intergenic
novel_circ_000157	NA	A01	-	13550433	13556034	5602	intergenic
novel_circ_000158	NA	A01	+	13617774	13617976	203	intergenic
novel_circ_000159	NA	A01	-	13964539	13965036	498	intergenic
novel_circ_000160	NA	A01	+	13964543	13965040	498	intergenic
novel_circ_000161	NA	A01	+	14284627	14284836	210	intergenic
novel_circ_000162	NA	A01	-	14284627	14284836	210	intergenic
novel_circ_000163	Bra029919	A01	-	14358974	14359409	436	antisense
novel_circ_000164	Bra029927	A01	+	14406458	14407461	1004	antisense
novel_circ_000165	NA	A01	-	14789399	14789941	543	intergenic
novel_circ_000166	Bra035471	A01	+	15740325	15740698	374	antisense
novel_circ_000167	Bra035466	A01	-	15791238	15791525	216	annot_exons
novel_circ_000168	Bra035438	A01	+	16095132	16096306	563	exon_intron
novel_circ_000169	Bra035438	A01	+	16095132	16098687	1102	exon_intron
novel_circ_000170	Bra035438	A01	+	16095135	16098687	1099	exon_intron
novel_circ_000171	NA	A01	+	16485484	16487423	1940	intergenic
novel_circ_000172	Bra031521	A01	+	16602689	16603093	405	one_exon
novel_circ_000173	Bra028339	A01	+	18259644	18260153	510	one_exon
novel_circ_000174	Bra023734	A01	-	18617217	18621946	4641	exon_intron
novel_circ_000175	NA	A01	+	19226772	19228922	2151	intergenic
novel_circ_000176	Bra023825	A01	-	19373751	19374031	281	exon_intron
novel_circ_000177	Bra023825	A01	-	19375211	19375397	187	one_exon
novel_circ_000178	Bra023829	A01	-	19405740	19406308	478	annot_exons
novel_circ_000179	Bra023830	A01	-	19425364	19425646	283	one_exon
novel_circ_000180	Bra023901	A01	+	20071284	20072731	953	exon_intron
novel_circ_000181	Bra037544	A01	+	20958934	20959906	345	annot_exons
novel_circ_000182	Bra037563	A01	-	21129721	21135631	1937	exon_intron
novel_circ_000183	Bra037578	A01	-	21217938	21218185	248	exon_intron
novel_circ_000184	Bra037581	A01	+	21279864	21280015	152	antisense
novel_circ_000185	Bra021321	A01	+	21393841	21426554	32629	exon_intron
novel_circ_000186	Bra021320	A01	-	21393841	21426554	28627	exon_intron
novel_circ_000187	Bra021281	A01	+	21963891	21964045	155	antisense
novel_circ_000188	Bra021281	A01	-	21963891	21964045	155	exon_intron
novel_circ_000189	Bra021275	A01	-	22037236	22037564	246	annot_exons
novel_circ_000190	Bra021239	A01	+	22313596	22313814	219	one_exon
novel_circ_000191	Bra021214	A01	+	22496184	22496367	184	exon_intron
novel_circ_000192	Bra021214	A01	-	22496184	22496367	184	antisense
novel_circ_000193	Bra021194	A01	+	22607267	22609732	2466	antisense
novel_circ_000194	Bra021137	A01	+	22950811	22951582	772	antisense
novel_circ_000195	Bra021551	A01	-	23755031	23755294	264	antisense
novel_circ_000196	Bra021530	A01	-	23893939	23894389	451	antisense
novel_circ_000197	Bra021526	A01	-	23916055	23917007	615	annot_exons
novel_circ_000198	Bra021503	A01	-	24090856	24093225	2370	antisense
novel_circ_000199	Bra038734	A01	-	24264369	24264610	242	antisense
novel_circ_000200	Bra038734	A01	-	24264607	24264787	181	antisense
novel_circ_000201	Bra038734	A01	-	24264701	24264856	156	antisense
novel_circ_000202	Bra038674	A01	-	24532498	24533055	558	one_exon
novel_circ_000203	Bra034167	A01	-	24644993	24645178	186	antisense
novel_circ_000204	Bra034148	A01	-	24765175	24765455	281	antisense
novel_circ_000205	Bra034060	A01	-	25189413	25189854	442	antisense
novel_circ_000206	Bra040057	A01	+	25284156	25287213	2820	exon_intron
novel_circ_000207	Bra021377	A01	-	26388120	26388332	213	one_exon
novel_circ_000208	Bra021418	A01	-	26504793	26505070	278	exon_intron
novel_circ_000209	Bra021418	A01	-	26505378	26505547	170	one_exon
novel_circ_000210	Bra021418	A01	+	26505378	26505547	170	antisense
novel_circ_000211	Bra021422	A01	-	26513708	26514033	326	one_exon
novel_circ_000212	Bra028918	A02	+	15190	15378	189	one_exon
novel_circ_000213	Bra028851	A02	-	361022	361259	238	antisense
novel_circ_000214	Bra028836	A02	-	440834	441100	267	exon_intron
novel_circ_000215	Bra028740	A02	+	905509	906207	699	antisense
novel_circ_000216	Bra028735	A02	-	938420	939099	680	exon_intron
novel_circ_000217	Bra028714	A02	-	1030660	1030944	285	one_exon
novel_circ_000218	Bra028684	A02	+	1183376	1183648	273	antisense
novel_circ_000219	Bra028631	A02	-	1391870	1392067	198	intronic
novel_circ_000220	Bra023327	A02	+	1830983	1831232	250	one_exon
novel_circ_000221	Bra023376	A02	+	2042306	2042515	210	one_exon
novel_circ_000222	Bra023378	A02	-	2055606	2055767	162	one_exon
novel_circ_000223	Bra023386	A02	-	2099759	2104628	2786	exon_intron
novel_circ_000224	Bra023392	A02	+	2129661	2129969	309	antisense
novel_circ_000225	Bra023397	A02	-	2165782	2172493	6712	exon_intron
novel_circ_000226	Bra023397	A02	+	2165783	2172494	6712	antisense
novel_circ_000227	Bra023409	A02	+	2235511	2235668	158	antisense
novel_circ_000228	Bra023439	A02	+	2349617	2349916	300	antisense
novel_circ_000229	Bra023439	A02	-	2349648	2349925	278	one_exon
novel_circ_000230	Bra023439	A02	+	2349678	2349916	239	antisense
novel_circ_000231	Bra023511	A02	-	2676206	2676889	459	exon_intron
novel_circ_000232	Bra023544	A02	-	2835475	2835792	318	one_exon
novel_circ_000233	Bra023544	A02	+	2835746	2836099	354	antisense
novel_circ_000234	Bra023565	A02	-	2919025	2919176	152	one_exon
novel_circ_000235	Bra023588	A02	+	3053543	3054004	462	one_exon
novel_circ_000236	Bra020037	A02	-	3717303	3717573	271	one_exon
novel_circ_000237	Bra020040	A02	-	3746402	3746779	378	exon_intron
novel_circ_000238	Bra020082	A02	-	3937939	3938223	285	antisense
novel_circ_000239	Bra020153	A02	+	4265766	4266428	663	antisense
novel_circ_000240	Bra020169	A02	-	4356312	4356588	277	one_exon
novel_circ_000241	Bra020234	A02	+	4695460	4695649	190	one_exon
novel_circ_000242	Bra020253	A02	-	4846204	4852977	6687	exon_intron
novel_circ_000243	Bra020284	A02	+	4988001	4994368	6368	antisense
novel_circ_000244	Bra020331	A02	+	5154654	5232063	76748	exon_intron
novel_circ_000245	Bra020375	A02	-	5430566	5430766	201	one_exon
novel_circ_000246	Bra020375	A02	+	5431055	5431447	393	antisense
novel_circ_000247	Bra020382	A02	-	5454145	5454318	174	exon_intron
novel_circ_000248	Bra020454	A02	+	5837694	5839619	1926	exon_intron
novel_circ_000249	Bra035647	A02	-	5948939	5949263	325	one_exon
novel_circ_000250	NA	A02	+	5964285	5968663	4379	intergenic
novel_circ_000251	NA	A02	-	5973881	5974023	143	intergenic
novel_circ_000252	Bra035641	A02	+	5996470	5996794	325	one_exon
novel_circ_000253	NA	A02	-	6167029	6167286	258	intergenic
novel_circ_000254	Bra035582	A02	-	6397525	6398519	573	annot_exons
novel_circ_000255	Bra035574	A02	+	6436435	6439615	3181	antisense
novel_circ_000256	Bra022721	A02	+	6786624	6787106	483	antisense
novel_circ_000257	Bra022605	A02	-	7556074	7570309	14144	exon_intron
novel_circ_000258	Bra022585	A02	-	7716645	7717286	537	exon_intron
novel_circ_000259	Bra022585	A02	-	7717095	7717283	189	one_exon
novel_circ_000260	Bra022511	A02	+	8322950	8323648	699	antisense
novel_circ_000261	Bra022500	A02	-	8397947	8398363	417	antisense
novel_circ_000262	Bra022484	A02	+	8472686	8473115	430	antisense
novel_circ_000263	Bra022478	A02	+	8503346	8503833	488	antisense
novel_circ_000264	Bra039746	A02	+	8698950	8702503	3554	exon_intron
novel_circ_000265	Bra039746	A02	+	8699234	8702180	2947	exon_intron
novel_circ_000266	Bra039746	A02	+	8699909	8702180	2272	exon_intron
novel_circ_000267	Bra039746	A02	+	8699931	8702180	2250	exon_intron
novel_circ_000268	Bra039746	A02	+	8700292	8702180	1889	exon_intron
novel_circ_000269	Bra039746	A02	+	8700464	8702180	1717	exon_intron
novel_circ_000270	Bra039746	A02	+	8700818	8702180	1363	exon_intron
novel_circ_000271	NA	A02	+	8765446	8766347	902	intergenic
novel_circ_000272	Bra039756	A02	-	8770024	8770340	237	annot_exons
novel_circ_000273	Bra034020	A02	-	9144127	9150027	5125	annot_exons
novel_circ_000274	Bra038313	A02	-	10337338	10337995	512	exon_intron
novel_circ_000275	Bra007911	A02	-	10808182	10808419	238	antisense
novel_circ_000276	Bra007911	A02	-	10808196	10808358	163	antisense
novel_circ_000277	Bra008027	A02	-	11642883	11643132	250	one_exon
novel_circ_000278	Bra008033	A02	-	11687041	11687540	369	exon_intron
novel_circ_000279	Bra008033	A02	-	11687266	11687512	116	annot_exons
novel_circ_000280	NA	A02	+	11812687	11814766	2080	intergenic
novel_circ_000281	Bra008046	A02	-	11841862	11842044	183	antisense
novel_circ_000282	Bra008067	A02	+	11994078	11995166	325	exon_intron
novel_circ_000283	Bra008067	A02	+	11994639	11994920	282	intronic
novel_circ_000284	Bra008080	A02	-	12033417	12033658	242	one_exon
novel_circ_000285	Bra008093	A02	-	12093927	12095234	1308	antisense
novel_circ_000286	NA	A02	-	12346872	12358345	11474	intergenic
novel_circ_000287	Bra008242	A02	-	13037940	13038323	384	exon_intron
novel_circ_000288	Bra008242	A02	+	13038053	13038328	276	antisense
novel_circ_000289	Bra008242	A02	-	13038072	13038275	204	one_exon
novel_circ_000290	Bra008242	A02	-	13038072	13038343	272	one_exon
novel_circ_000291	Bra008245	A02	-	13056279	13056593	315	exon_intron
novel_circ_000292	Bra008261	A02	-	13185323	13185793	471	antisense
novel_circ_000293	Bra008279	A02	-	13309343	13309663	321	one_exon
novel_circ_000294	Bra008327	A02	+	13738783	13742661	3879	antisense
novel_circ_000295	Bra008355	A02	-	14003467	14003627	161	antisense
novel_circ_000296	Bra008433	A02	-	14606802	14607030	229	one_exon
novel_circ_000297	Bra008512	A02	-	15089695	15090232	538	one_exon
novel_circ_000298	NA	A02	-	15589798	15592043	2246	intergenic
novel_circ_000299	NA	A02	+	15589798	15592043	2246	intergenic
novel_circ_000300	Bra033135	A02	-	16489483	16492693	3211	antisense
novel_circ_000301	NA	A02	+	16509581	16510104	524	intergenic
novel_circ_000302	NA	A02	-	16954260	16957589	3330	intergenic
novel_circ_000303	Bra021982	A02	+	17805429	17805636	208	one_exon
novel_circ_000304	Bra021982	A02	+	17805485	17806111	627	one_exon
novel_circ_000305	Bra021999	A02	-	18019660	18020037	378	antisense
novel_circ_000306	Bra022022	A02	+	18290119	18290338	220	antisense
novel_circ_000307	Bra022156	A02	+	19384375	19384798	246	exon_intron
novel_circ_000308	Bra026656	A02	+	19569938	19575127	5115	exon_intron
novel_circ_000309	Bra026653	A02	+	19614132	19614835	405	exon_intron
novel_circ_000310	Bra026639	A02	+	19716646	19716922	277	exon_intron
novel_circ_000311	Bra026613	A02	+	20075717	20076280	564	antisense
novel_circ_000312	Bra026580	A02	+	20321946	20322157	212	antisense
novel_circ_000313	Bra026571	A02	-	20387687	20388026	340	antisense
novel_circ_000314	NA	A02	+	21250719	21251988	1270	intergenic
novel_circ_000315	Bra036335	A02	+	21562521	21562909	301	exon_intron
novel_circ_000316	Bra032937	A02	+	21684829	21685539	711	antisense
novel_circ_000317	Bra033056	A02	+	22457760	22460135	2376	antisense
novel_circ_000318	Bra033102	A02	+	22685817	22692525	6709	antisense
novel_circ_000319	Bra033102	A02	-	22685817	22692525	4835	exon_intron
novel_circ_000320	Bra020701	A02	+	23125938	23134983	4123	exon_intron
novel_circ_000321	Bra020518	A02	+	24274734	24274956	223	antisense
novel_circ_000322	Bra020472	A02	+	24629627	24629883	257	one_exon
novel_circ_000323	Bra020469	A02	+	24645864	24648791	2342	exon_intron
novel_circ_000324	Bra029356	A02	+	25103670	25115749	12080	antisense
novel_circ_000325	Bra029326	A02	-	25309412	25315279	5015	exon_intron
novel_circ_000326	Bra029296	A02	+	25502577	25502906	206	annot_exons
novel_circ_000327	Bra029250	A02	-	25769581	25769996	416	antisense
novel_circ_000328	Bra029222	A02	-	25928457	25928931	316	exon_intron
novel_circ_000329	Bra031898	A02	-	26316221	26316496	276	one_exon
novel_circ_000330	Bra031874	A02	-	26455225	26456033	724	exon_intron
novel_circ_000331	Bra005675	A03	+	87981	88894	914	antisense
novel_circ_000332	Bra005762	A03	-	475594	475886	293	one_exon
novel_circ_000333	Bra005881	A03	+	1041409	1041804	396	one_exon
novel_circ_000334	Bra005938	A03	+	1316508	1327337	10830	antisense
novel_circ_000335	Bra005949	A03	+	1365115	1365408	294	one_exon
novel_circ_000336	Bra005998	A03	-	1542139	1551368	9230	exon_intron
novel_circ_000337	Bra006006	A03	+	1588415	1588943	440	exon_intron
novel_circ_000338	Bra006016	A03	+	1636071	1636299	229	one_exon
novel_circ_000339	Bra006035	A03	-	1697755	1699156	763	annot_exons
novel_circ_000340	Bra006068	A03	-	1851369	1851637	269	one_exon
novel_circ_000341	Bra006094	A03	-	1962362	1962649	288	one_exon
novel_circ_000342	Bra006148	A03	-	2228648	2228821	174	one_exon
novel_circ_000343	Bra006210	A03	-	2532550	2532699	150	one_exon
novel_circ_000344	Bra006216	A03	+	2552411	2558521	6111	exon_intron
novel_circ_000345	Bra006216	A03	+	2552413	2558523	6111	exon_intron
novel_circ_000346	Bra006215	A03	-	2552413	2558523	5607	exon_intron
novel_circ_000347	Bra006215	A03	-	2552419	2558529	5607	exon_intron
novel_circ_000348	Bra006301	A03	-	2921973	2922275	303	one_exon
novel_circ_000349	Bra006341	A03	-	3095768	3095880	113	antisense
novel_circ_000350	Bra006348	A03	+	3119311	3132090	12780	exon_intron
novel_circ_000351	Bra006347	A03	-	3119311	3132090	9033	exon_intron
novel_circ_000352	Bra006367	A03	+	3201955	3202183	229	one_exon
novel_circ_000353	Bra006386	A03	+	3287284	3298157	10874	antisense
novel_circ_000354	Bra006416	A03	+	3415846	3416357	512	antisense
novel_circ_000355	NA	A03	-	3503119	3503583	465	intergenic
novel_circ_000356	Bra006446	A03	-	3514108	3519657	4108	exon_intron
novel_circ_000357	Bra006447	A03	-	3516416	3522139	4784	exon_intron
novel_circ_000358	Bra006447	A03	+	3519871	3520085	215	antisense
novel_circ_000359	Bra006447	A03	+	3519876	3520090	215	antisense
novel_circ_000360	Bra006447	A03	+	3519877	3520091	215	antisense
novel_circ_000361	Bra006447	A03	-	3519879	3520093	215	exon_intron
novel_circ_000362	Bra006452	A03	-	3543498	3555243	10648	exon_intron
novel_circ_000363	Bra006506	A03	+	3827802	3828032	231	one_exon
novel_circ_000364	Bra006588	A03	-	4173815	4174002	188	antisense
novel_circ_000365	Bra006633	A03	-	4378328	4378603	276	exon_intron
novel_circ_000366	Bra006679	A03	-	4590285	4599235	8689	exon_intron
novel_circ_000367	Bra006679	A03	-	4590554	4599600	8544	exon_intron
novel_circ_000368	Bra006679	A03	-	4591555	4600650	8035	exon_intron
novel_circ_000369	Bra006679	A03	-	4591555	4600746	8131	exon_intron
novel_circ_000370	Bra006722	A03	+	4794432	4794896	392	annot_exons
novel_circ_000371	Bra006747	A03	+	4884933	4885388	456	exon_intron
novel_circ_000372	Bra006767	A03	+	4974193	4974458	266	exon_intron
novel_circ_000373	Bra028952	A03	+	5562808	5582472	19265	exon_intron
novel_circ_000374	Bra028949	A03	-	5562808	5582472	19152	exon_intron
novel_circ_000375	Bra029041	A03	-	6026803	6027678	675	annot_exons
novel_circ_000376	Bra029054	A03	-	6077955	6078205	251	exon_intron
novel_circ_000377	Bra029067	A03	+	6163552	6163821	270	antisense
novel_circ_000378	Bra029068	A03	-	6186283	6186476	194	antisense
novel_circ_000379	Bra029068	A03	+	6186312	6186521	210	one_exon
novel_circ_000380	Bra029068	A03	-	6186325	6186517	193	antisense
novel_circ_000381	Bra029068	A03	+	6186325	6186517	193	one_exon
novel_circ_000382	Bra029068	A03	+	6186333	6186482	150	one_exon
novel_circ_000383	Bra029104	A03	-	6385259	6385428	170	antisense
novel_circ_000384	Bra029129	A03	-	6498066	6498458	297	exon_intron
novel_circ_000385	Bra029177	A03	-	6717828	6717992	165	antisense
novel_circ_000386	NA	A03	-	7156610	7156837	228	intergenic
novel_circ_000387	Bra022804	A03	-	7157861	7160989	2624	exon_intron
novel_circ_000388	Bra022840	A03	-	7368832	7368987	156	one_exon
novel_circ_000389	NA	A03	+	7396888	7397483	596	intergenic
novel_circ_000390	Bra022870	A03	+	7492724	7492923	200	one_exon
novel_circ_000391	Bra023075	A03	-	8561914	8562116	203	antisense
novel_circ_000392	Bra023075	A03	-	8561914	8562139	226	antisense
novel_circ_000393	Bra023075	A03	-	8561914	8562143	230	antisense
novel_circ_000394	Bra000058	A03	+	9125003	9125229	227	one_exon
novel_circ_000395	Bra000064	A03	-	9149016	9149537	522	antisense
novel_circ_000396	Bra000114	A03	-	9336162	9336395	234	exon_intron
novel_circ_000397	Bra000115	A03	-	9351593	9352018	426	antisense
novel_circ_000398	Bra000115	A03	-	9351596	9352018	423	antisense
novel_circ_000399	Bra000121	A03	-	9390145	9402906	9600	exon_intron
novel_circ_000400	Bra000121	A03	-	9390582	9403554	10778	exon_intron
novel_circ_000401	Bra000122	A03	-	9390859	9419242	26751	exon_intron
novel_circ_000402	Bra000158	A03	-	9638832	9639176	345	one_exon
novel_circ_000403	Bra000164	A03	-	9673688	9673969	282	one_exon
novel_circ_000404	Bra000220	A03	+	9974944	9975256	313	one_exon
novel_circ_000405	Bra000242	A03	-	10127810	10128082	273	one_exon
novel_circ_000406	Bra000296	A03	-	10418842	10419262	421	antisense
novel_circ_000407	Bra000399	A03	+	10953438	10953621	184	one_exon
novel_circ_000408	Bra000455	A03	+	11218833	11219138	306	one_exon
novel_circ_000409	Bra000460	A03	-	11233742	11234041	300	antisense
novel_circ_000410	Bra000460	A03	+	11233867	11234088	222	one_exon
novel_circ_000411	Bra000508	A03	-	11519796	11520035	240	antisense
novel_circ_000412	NA	A03	-	11743740	11744589	850	intergenic
novel_circ_000413	Bra000592	A03	-	11957303	11962955	5582	exon_intron
novel_circ_000414	Bra000592	A03	-	11957855	11963501	5506	exon_intron
novel_circ_000415	Bra000594	A03	-	11976952	11977226	275	one_exon
novel_circ_000416	Bra000594	A03	-	11976957	11977139	183	one_exon
novel_circ_000417	Bra000602	A03	-	12022518	12022698	181	antisense
novel_circ_000418	Bra000657	A03	-	12346252	12346508	257	exon_intron
novel_circ_000419	Bra000657	A03	+	12347857	12348360	504	antisense
novel_circ_000420	Bra000661	A03	+	12366565	12366918	354	one_exon
novel_circ_000421	Bra000743	A03	+	12831921	12832199	279	antisense
novel_circ_000422	Bra000811	A03	+	13317547	13317796	250	exon_intron
novel_circ_000423	Bra000910	A03	-	13883900	13884193	294	one_exon
novel_circ_000424	Bra000969	A03	+	14193336	14193581	246	one_exon
novel_circ_000425	Bra000973	A03	+	14221223	14222314	1092	antisense
novel_circ_000426	Bra001086	A03	-	14682160	14682423	264	antisense
novel_circ_000427	Bra001091	A03	-	14704476	14759748	53547	exon_intron
novel_circ_000428	NA	A03	-	15037176	15037354	179	intergenic
novel_circ_000429	Bra001161	A03	-	15046977	15047414	359	annot_exons
novel_circ_000430	Bra001200	A03	+	15289973	15290230	258	antisense
novel_circ_000431	Bra001249	A03	-	15543790	15544327	538	antisense
novel_circ_000432	NA	A03	+	15567190	15567388	199	intergenic
novel_circ_000433	NA	A03	-	15576512	15576840	329	intergenic
novel_circ_000434	Bra001385	A03	-	16130153	16136119	5861	exon_intron
novel_circ_000435	Bra001461	A03	+	16497449	16497922	474	exon_intron
novel_circ_000436	Bra001480	A03	+	16623012	16623191	180	exon_intron
novel_circ_000437	Bra001484	A03	-	16642841	16643256	294	annot_exons
novel_circ_000438	Bra001526	A03	+	16873223	16884001	9659	exon_intron
novel_circ_000439	Bra001525	A03	-	16873223	16884001	8122	exon_intron
novel_circ_000440	Bra001526	A03	+	16873223	16895673	21331	exon_intron
novel_circ_000441	Bra001525	A03	-	16873223	16895673	19794	exon_intron
novel_circ_000442	Bra001526	A03	+	16873226	16884004	9659	exon_intron
novel_circ_000443	Bra001525	A03	-	16873231	16883707	7820	exon_intron
novel_circ_000444	Bra001525	A03	-	16873231	16883740	7853	exon_intron
novel_circ_000445	Bra001525	A03	-	16873231	16895412	19525	exon_intron
novel_circ_000446	Bra001537	A03	+	16930657	16931383	727	antisense
novel_circ_000447	Bra001676	A03	+	17816254	17838291	21013	exon_intron
novel_circ_000448	Bra001675	A03	-	17816778	17839363	16276	exon_intron
novel_circ_000449	Bra001676	A03	+	17816778	17839363	21561	exon_intron
novel_circ_000450	Bra001713	A03	-	18031282	18031462	181	one_exon
novel_circ_000451	Bra001713	A03	-	18031282	18031476	195	one_exon
novel_circ_000452	Bra001718	A03	-	18048721	18048902	182	exon_intron
novel_circ_000453	Bra001726	A03	+	18086873	18106311	17092	exon_intron
novel_circ_000454	Bra001726	A03	+	18086873	18107462	18243	exon_intron
novel_circ_000455	Bra001726	A03	+	18086873	18107519	18300	exon_intron
novel_circ_000456	Bra001752	A03	-	18267459	18267836	378	one_exon
novel_circ_000457	Bra001771	A03	-	18375794	18376012	219	antisense
novel_circ_000458	Bra001781	A03	-	18427252	18427547	227	annot_exons
novel_circ_000459	Bra001950	A03	+	19572095	19572316	222	antisense
novel_circ_000460	Bra001950	A03	+	19572095	19572421	327	antisense
novel_circ_000461	Bra001950	A03	+	19572095	19574410	2316	antisense
novel_circ_000462	Bra001950	A03	+	19572101	19572640	540	antisense
novel_circ_000463	Bra001950	A03	+	19572170	19572388	219	antisense
novel_circ_000464	Bra001950	A03	+	19572170	19572391	222	antisense
novel_circ_000465	Bra001950	A03	+	19572521	19572646	126	antisense
novel_circ_000466	Bra001951	A03	-	19587858	19588070	213	antisense
novel_circ_000467	Bra013247	A03	-	19672725	19673029	305	antisense
novel_circ_000468	Bra013224	A03	+	19799807	19800375	398	annot_exons
novel_circ_000469	Bra013206	A03	+	19909619	19909840	222	exon_intron
novel_circ_000470	Bra013158	A03	+	20162827	20163125	299	one_exon
novel_circ_000471	Bra013151	A03	-	20199588	20199794	207	antisense
novel_circ_000472	Bra013059	A03	+	20728974	20729318	345	antisense
novel_circ_000473	Bra013022	A03	+	20979982	20980561	580	antisense
novel_circ_000474	Bra012938	A03	-	21442841	21443065	225	one_exon
novel_circ_000475	Bra012890	A03	-	21737622	21737851	230	antisense
novel_circ_000476	Bra012889	A03	+	21745932	21746306	375	one_exon
novel_circ_000477	Bra012868	A03	-	21873133	21873333	201	one_exon
novel_circ_000478	Bra012632	A03	+	23069841	23070267	427	exon_intron
novel_circ_000479	Bra012600	A03	+	23315799	23315919	121	antisense
novel_circ_000480	Bra012570	A03	-	23512909	23517152	4244	antisense
novel_circ_000481	Bra012570	A03	-	23512909	23517511	4603	antisense
novel_circ_000482	Bra012513	A03	-	23918878	23919267	300	annot_exons
novel_circ_000483	Bra019410	A03	-	24353851	24376707	22615	exon_intron
novel_circ_000484	Bra019411	A03	+	24371098	24386165	15068	exon_intron
novel_circ_000485	Bra019410	A03	-	24371098	24386165	13177	exon_intron
novel_circ_000486	Bra019410	A03	+	24375019	24383195	8177	antisense
novel_circ_000487	Bra019406	A03	-	24393184	24393486	303	exon_intron
novel_circ_000488	Bra019406	A03	-	24393184	24393585	402	exon_intron
novel_circ_000489	Bra019406	A03	+	24393184	24393598	415	antisense
novel_circ_000490	Bra019406	A03	+	24393184	24393610	427	antisense
novel_circ_000491	Bra019406	A03	-	24393491	24393762	272	one_exon
novel_circ_000492	Bra019376	A03	+	24600479	24600829	351	one_exon
novel_circ_000493	Bra019366	A03	+	24701466	24702127	662	one_exon
novel_circ_000494	Bra019342	A03	-	24835432	24835848	333	annot_exons
novel_circ_000495	Bra019293	A03	-	25194220	25219171	24952	antisense
novel_circ_000496	Bra019271	A03	-	25360979	25361675	697	antisense
novel_circ_000497	Bra019044	A03	+	26613367	26613522	156	antisense
novel_circ_000498	Bra019044	A03	+	26613457	26613696	240	antisense
novel_circ_000499	Bra019044	A03	-	26613469	26613708	240	one_exon
novel_circ_000500	Bra019044	A03	+	26613523	26613696	174	antisense
novel_circ_000501	Bra024143	A03	+	27381612	27382149	363	annot_exons
novel_circ_000502	Bra024117	A03	-	27499034	27588008	85255	exon_intron
novel_circ_000503	Bra024101	A03	+	27663630	27663883	254	antisense
novel_circ_000504	Bra024094	A03	-	27730585	27732642	1712	exon_intron
novel_circ_000505	Bra024087	A03	-	27760422	27760834	183	annot_exons
novel_circ_000506	NA	A03	-	28278890	28279091	202	intergenic
novel_circ_000507	Bra023987	A03	+	28455221	28455451	231	one_exon
novel_circ_000508	Bra023952	A03	-	28664872	28665606	486	annot_exons
novel_circ_000509	Bra036984	A03	-	29138446	29138843	398	antisense
novel_circ_000510	Bra036984	A03	-	29138500	29138814	315	antisense
novel_circ_000511	Bra017668	A03	+	29689933	29692947	2333	exon_intron
novel_circ_000512	Bra017672	A03	-	29712612	29713028	417	one_exon
novel_circ_000513	Bra017684	A03	+	29806583	29806834	252	antisense
novel_circ_000514	Bra017734	A03	-	30159870	30160063	194	antisense
novel_circ_000515	Bra017735	A03	-	30168956	30169210	255	antisense
novel_circ_000516	Bra017741	A03	+	30192236	30192349	114	antisense
novel_circ_000517	Bra017773	A03	+	30405913	30410454	4542	antisense
novel_circ_000518	Bra017773	A03	-	30405913	30410454	4542	exon_intron
novel_circ_000519	Bra017819	A03	+	30746348	30746599	252	antisense
novel_circ_000520	Bra017820	A03	+	30746348	30750819	4472	antisense
novel_circ_000521	Bra017872	A03	-	31218915	31219383	245	exon_intron
novel_circ_000522	Bra017889	A03	-	31404386	31404578	193	antisense
novel_circ_000523	Bra017900	A03	-	31572897	31573349	381	annot_exons
novel_circ_000524	Bra040426	A04	+	172966	173222	257	antisense
novel_circ_000525	Bra014399	A04	+	318696	321801	3106	antisense
novel_circ_000526	Bra014399	A04	-	318696	321801	3005	exon_intron
novel_circ_000527	Bra014399	A04	+	318725	321830	3106	antisense
novel_circ_000528	NA	A04	+	504013	504265	253	intergenic
novel_circ_000529	NA	A04	+	504017	504269	253	intergenic
novel_circ_000530	Bra014505	A04	-	1075280	1075689	410	one_exon
novel_circ_000531	Bra014547	A04	-	1357878	1358167	290	one_exon
novel_circ_000532	Bra014605	A04	-	1730044	1731356	1313	antisense
novel_circ_000533	Bra014638	A04	-	1952257	1962980	10724	antisense
novel_circ_000534	NA	A04	-	1991802	1992211	410	intergenic
novel_circ_000535	Bra014652	A04	+	2037098	2054141	15035	exon_intron
novel_circ_000536	Bra014673	A04	+	2157433	2158117	518	annot_exons
novel_circ_000537	Bra014686	A04	-	2234482	2263790	29309	antisense
novel_circ_000538	Bra014732	A04	-	2663564	2663836	273	antisense
novel_circ_000539	Bra014744	A04	-	2749182	2759184	8970	exon_intron
novel_circ_000540	Bra014754	A04	-	2829149	2834432	5284	exon_intron
novel_circ_000541	Bra014754	A04	+	2829149	2834432	5284	antisense
novel_circ_000542	Bra039783	A04	+	3917687	3927127	9047	exon_intron
novel_circ_000543	Bra033439	A04	-	4547064	4547447	384	one_exon
novel_circ_000544	Bra033446	A04	-	4607069	4608365	589	annot_exons
novel_circ_000545	Bra033482	A04	-	4873367	4873652	286	exon_intron
novel_circ_000546	NA	A04	-	5423088	5423475	388	intergenic
novel_circ_000547	Bra032679	A04	-	5990123	5990690	376	exon_intron
novel_circ_000548	Bra032679	A04	+	5990123	5990690	568	antisense
novel_circ_000549	Bra028124	A04	-	6291524	6291716	193	antisense
novel_circ_000550	Bra028124	A04	+	6293169	6293627	459	one_exon
novel_circ_000551	Bra028192	A04	-	6901288	6901551	264	antisense
novel_circ_000552	Bra028192	A04	-	6901288	6901716	429	antisense
novel_circ_000553	Bra028211	A04	+	7073582	7073827	246	antisense
novel_circ_000554	Bra028225	A04	+	7183354	7183612	259	antisense
novel_circ_000555	Bra028225	A04	-	7183359	7183616	258	one_exon
novel_circ_000556	NA	A04	-	7282802	7283134	333	intergenic
novel_circ_000557	NA	A04	+	8408148	8408418	271	intergenic
novel_circ_000558	Bra025529	A04	-	8474419	8474666	248	one_exon
novel_circ_000559	Bra025462	A04	-	8940814	8941097	284	antisense
novel_circ_000560	Bra025450	A04	-	9033891	9034329	439	antisense
novel_circ_000561	Bra025450	A04	-	9034069	9034477	409	antisense
novel_circ_000562	NA	A04	-	9549416	9551988	2573	intergenic
novel_circ_000563	Bra030246	A04	-	10022728	10022998	271	antisense
novel_circ_000564	Bra032141	A04	+	10990604	11017670	27067	antisense
novel_circ_000565	Bra032070	A04	-	11464704	11464911	208	one_exon
novel_circ_000566	Bra032053	A04	-	11579617	11582432	2816	antisense
novel_circ_000567	NA	A04	-	11913480	11913665	186	intergenic
novel_circ_000568	Bra034321	A04	+	12257106	12257421	316	one_exon
novel_circ_000569	Bra034325	A04	+	12274834	12275201	290	annot_exons
novel_circ_000570	Bra034328	A04	-	12294967	12297249	1314	exon_intron
novel_circ_000571	Bra034338	A04	+	12369080	12369298	219	one_exon
novel_circ_000572	Bra034343	A04	-	12404042	12404266	225	one_exon
novel_circ_000573	Bra035673	A04	-	13007086	13007263	178	exon_intron
novel_circ_000574	Bra035652	A04	+	13166872	13167092	221	one_exon
novel_circ_000575	Bra021603	A04	+	13452823	13453030	208	exon_intron
novel_circ_000576	Bra021646	A04	+	13724309	13740017	15709	exon_intron
novel_circ_000577	Bra021713	A04	-	14155696	14156160	465	one_exon
novel_circ_000578	Bra021733	A04	-	14250111	14250386	276	antisense
novel_circ_000579	Bra021733	A04	-	14250210	14250386	177	antisense
novel_circ_000580	Bra021733	A04	-	14250387	14250788	402	antisense
novel_circ_000581	NA	A04	-	14666022	14667121	1100	intergenic
novel_circ_000582	Bra021810	A04	+	14741556	14741842	198	annot_exons
novel_circ_000583	Bra021874	A04	-	15073284	15073538	255	one_exon
novel_circ_000584	Bra021924	A04	-	15304218	15304403	186	antisense
novel_circ_000585	Bra017271	A04	+	15743909	15744287	379	antisense
novel_circ_000586	Bra017226	A04	-	16006368	16007196	412	annot_exons
novel_circ_000587	Bra017210	A04	-	16132205	16132405	201	one_exon
novel_circ_000588	Bra017210	A04	+	16132864	16133207	344	antisense
novel_circ_000589	NA	A04	+	16218267	16218461	195	intergenic
novel_circ_000590	Bra017121	A04	+	16613522	16614006	485	exon_intron
novel_circ_000591	Bra017076	A04	+	16888361	16888520	160	exon_intron
novel_circ_000592	Bra017049	A04	+	17020117	17021115	713	annot_exons
novel_circ_000593	Bra017049	A04	+	17020342	17021115	578	annot_exons
novel_circ_000594	Bra017049	A04	+	17020346	17021115	574	annot_exons
novel_circ_000595	Bra017019	A04	+	17208159	17208599	441	antisense
novel_circ_000596	Bra016948	A04	+	17552641	17553137	402	annot_exons
novel_circ_000597	Bra016908	A04	+	17756544	17756728	185	antisense
novel_circ_000598	Bra016868	A04	-	17922373	17923142	471	annot_exons
novel_circ_000599	Bra037739	A04	+	18048358	18051345	2988	exon_intron
novel_circ_000600	Bra037731	A04	-	18126604	18126819	216	antisense
novel_circ_000601	Bra037731	A04	-	18126640	18126819	180	antisense
novel_circ_000602	Bra037731	A04	-	18126895	18127068	174	antisense
novel_circ_000603	Bra037673	A04	+	18344489	18344622	134	antisense
novel_circ_000604	Bra039269	A04	-	18923128	18923400	273	antisense
novel_circ_000605	Bra004427	A05	+	77456	77843	388	antisense
novel_circ_000606	Bra004484	A05	-	373246	373600	355	antisense
novel_circ_000607	Bra004523	A05	+	614300	614566	267	one_exon
novel_circ_000608	Bra004633	A05	-	1149742	1150080	339	antisense
novel_circ_000609	Bra004633	A05	-	1149774	1150021	248	antisense
novel_circ_000610	Bra004642	A05	-	1190665	1191030	279	annot_exons
novel_circ_000611	Bra004645	A05	+	1200419	1202306	1888	exon_intron
novel_circ_000612	Bra004654	A05	-	1252877	1253658	548	exon_intron
novel_circ_000613	Bra004663	A05	-	1291702	1292086	303	exon_intron
novel_circ_000614	Bra004748	A05	-	1630073	1681930	49137	exon_intron
novel_circ_000615	Bra004749	A05	-	1651627	1651839	213	antisense
novel_circ_000616	Bra004749	A05	-	1652391	1652664	274	antisense
novel_circ_000617	Bra004749	A05	-	1652753	1653040	288	antisense
novel_circ_000618	Bra004749	A05	-	1652861	1653040	180	antisense
novel_circ_000619	Bra004749	A05	-	1652894	1653073	180	antisense
novel_circ_000620	Bra004776	A05	+	1796429	1796757	329	one_exon
novel_circ_000621	Bra004786	A05	-	1822495	1823343	849	antisense
novel_circ_000622	Bra004786	A05	+	1823858	1824117	260	one_exon
novel_circ_000623	Bra004817	A05	-	1940817	1941093	277	antisense
novel_circ_000624	Bra004850	A05	+	2135244	2135393	150	antisense
novel_circ_000625	Bra004916	A05	-	2472172	2472386	215	one_exon
novel_circ_000626	Bra004967	A05	+	2688628	2688788	161	one_exon
novel_circ_000627	Bra005000	A05	-	2903081	2903356	276	antisense
novel_circ_000628	Bra005016	A05	+	2988155	2989914	1760	exon_intron
novel_circ_000629	Bra005056	A05	+	3203785	3204225	356	annot_exons
novel_circ_000630	Bra005081	A05	+	3329362	3332967	3606	exon_intron
novel_circ_000631	Bra005091	A05	+	3376262	3380377	3686	exon_intron
novel_circ_000632	Bra005090	A05	-	3376262	3380377	3025	exon_intron
novel_circ_000633	Bra005097	A05	-	3407266	3407540	275	exon_intron
novel_circ_000634	Bra005099	A05	-	3412966	3413551	318	exon_intron
novel_circ_000635	Bra005104	A05	+	3443018	3443293	276	antisense
novel_circ_000636	Bra005110	A05	+	3474651	3475109	292	annot_exons
novel_circ_000637	Bra005183	A05	-	3879719	3879924	206	antisense
novel_circ_000638	Bra005222	A05	-	4103091	4103336	246	antisense
novel_circ_000639	Bra005264	A05	-	4373252	4373451	200	antisense
novel_circ_000640	NA	A05	+	4546268	4546507	240	intergenic
novel_circ_000641	NA	A05	-	4604153	4609344	5192	intergenic
novel_circ_000642	NA	A05	-	4604341	4609743	5403	intergenic
novel_circ_000643	NA	A05	-	4604498	4609923	5426	intergenic
novel_circ_000644	NA	A05	+	4604500	4609925	5426	intergenic
novel_circ_000645	Bra005310	A05	+	4726594	4726855	262	antisense
novel_circ_000646	Bra005312	A05	+	4752962	4753386	425	one_exon
novel_circ_000647	Bra005457	A05	-	5586794	5592063	5270	antisense
novel_circ_000648	Bra005543	A05	-	6134407	6134613	207	antisense
novel_circ_000649	Bra005575	A05	+	6291050	6291510	461	antisense
novel_circ_000650	Bra018250	A05	+	6933676	6934099	424	antisense
novel_circ_000651	Bra018255	A05	-	6967618	6970769	2379	exon_intron
novel_circ_000652	NA	A05	-	7376997	7377164	168	intergenic
novel_circ_000653	NA	A05	+	7376997	7377164	168	intergenic
novel_circ_000654	Bra018311	A05	+	7378397	7378647	251	exon_intron
novel_circ_000655	Bra018311	A05	+	7380197	7380361	165	one_exon
novel_circ_000656	Bra018346	A05	-	7632986	7633586	601	one_exon
novel_circ_000657	Bra018351	A05	-	7701192	7701436	245	one_exon
novel_circ_000658	Bra018369	A05	-	7807901	7808116	216	one_exon
novel_circ_000659	Bra018403	A05	+	7992435	8001935	9501	exon_intron
novel_circ_000660	Bra018468	A05	+	8352752	8352949	198	antisense
novel_circ_000661	NA	A05	+	9052218	9052799	582	intergenic
novel_circ_000662	Bra037098	A05	+	9406441	9409351	2911	antisense
novel_circ_000663	Bra037098	A05	-	9406441	9409351	2911	exon_intron
novel_circ_000664	Bra021322	A05	-	9525788	9526105	318	one_exon
novel_circ_000665	Bra021323	A05	+	9567853	9568018	166	antisense
novel_circ_000666	NA	A05	-	9663698	9668668	4971	intergenic
novel_circ_000667	NA	A05	-	9702424	9707292	4869	intergenic
novel_circ_000668	NA	A05	+	10069392	10074529	5138	intergenic
novel_circ_000669	NA	A05	-	10069392	10074529	5138	intergenic
novel_circ_000670	Bra030402	A05	-	10990414	10991085	672	antisense
novel_circ_000671	Bra030402	A05	-	10990918	10991085	168	antisense
novel_circ_000672	Bra030404	A05	+	11010550	11010755	206	exon_intron
novel_circ_000673	Bra030429	A05	-	11246377	11246724	348	antisense
novel_circ_000674	Bra032207	A05	-	13026735	13030608	3007	exon_intron
novel_circ_000675	Bra032207	A05	-	13026924	13030608	2818	exon_intron
novel_circ_000676	NA	A05	+	14254812	14257066	2255	intergenic
novel_circ_000677	Bra010178	A05	+	14926490	14926772	283	one_exon
novel_circ_000678	Bra010178	A05	+	14926607	14926762	156	one_exon
novel_circ_000679	Bra033844	A05	+	15282782	15283089	191	annot_exons
novel_circ_000680	Bra033849	A05	-	15385629	15385923	295	antisense
novel_circ_000681	NA	A05	+	16266240	16267457	1218	intergenic
novel_circ_000682	NA	A05	-	16266240	16267457	1218	intergenic
novel_circ_000683	Bra040830	A05	+	16285080	16285209	130	one_exon
novel_circ_000684	Bra040834	A05	-	16295124	16295413	290	one_exon
novel_circ_000685	Bra039954	A05	-	16396775	16397146	372	exon_intron
novel_circ_000686	Bra039954	A05	-	16396775	16398138	680	exon_intron
novel_circ_000687	Bra039947	A05	-	16504819	16505221	403	one_exon
novel_circ_000688	Bra039947	A05	-	16507526	16507826	301	one_exon
novel_circ_000689	Bra039947	A05	-	16507577	16508317	581	annot_exons
novel_circ_000690	Bra039947	A05	-	16508429	16508591	163	one_exon
novel_circ_000691	Bra031348	A05	+	16546754	16547017	264	antisense
novel_circ_000692	NA	A05	+	16645029	16645164	136	intergenic
novel_circ_000693	Bra031329	A05	-	16678699	16679120	422	antisense
novel_circ_000694	Bra031329	A05	-	16678884	16679114	231	antisense
novel_circ_000695	Bra031329	A05	-	16678899	16679087	189	antisense
novel_circ_000696	Bra031329	A05	-	16678908	16679114	207	antisense
novel_circ_000697	Bra031329	A05	-	16678908	16679120	213	antisense
novel_circ_000698	Bra031329	A05	-	16678932	16679114	183	antisense
novel_circ_000699	Bra031329	A05	-	16678947	16679120	174	antisense
novel_circ_000700	Bra031245	A05	+	17439864	17440124	261	antisense
novel_circ_000701	Bra035746	A05	+	17614893	17615158	266	one_exon
novel_circ_000702	Bra035800	A05	-	17989703	17990074	372	antisense
novel_circ_000703	Bra035805	A05	-	17998742	17999128	387	one_exon
novel_circ_000704	Bra022450	A05	+	18295758	18296051	294	antisense
novel_circ_000705	Bra022384	A05	-	18750947	18751880	444	annot_exons
novel_circ_000706	Bra022381	A05	-	18783362	18783700	339	one_exon
novel_circ_000707	NA	A05	-	18960348	18967721	7374	intergenic
novel_circ_000708	Bra022290	A05	+	19311152	19318734	7583	antisense
novel_circ_000709	Bra022273	A05	+	19438963	19447623	8061	exon_intron
novel_circ_000710	Bra022233	A05	-	19626080	19639535	12568	exon_intron
novel_circ_000711	Bra022180	A05	+	19987172	19987348	177	one_exon
novel_circ_000712	Bra022171	A05	-	20039051	20039272	222	antisense
novel_circ_000713	NA	A05	+	20040777	20041181	405	intergenic
novel_circ_000714	NA	A05	+	20041049	20041710	662	intergenic
novel_circ_000715	Bra022170	A05	+	20043469	20049191	4194	exon_intron
novel_circ_000716	Bra022170	A05	+	20043877	20049599	4194	exon_intron
novel_circ_000717	Bra022170	A05	-	20044453	20050104	5652	antisense
novel_circ_000718	Bra022170	A05	+	20044453	20050104	4046	exon_intron
novel_circ_000719	Bra022161	A05	+	20132064	20132599	444	annot_exons
novel_circ_000720	NA	A05	+	20262029	20262334	306	intergenic
novel_circ_000721	Bra027197	A05	-	20348990	20349522	461	annot_exons
novel_circ_000722	Bra027209	A05	+	20441292	20441509	218	antisense
novel_circ_000723	Bra027223	A05	-	20508986	20515957	5958	exon_intron
novel_circ_000724	Bra027224	A05	-	20512036	20517760	4898	exon_intron
novel_circ_000725	Bra027257	A05	-	20688768	20688921	154	antisense
novel_circ_000726	Bra027283	A05	+	20826474	20826632	159	one_exon
novel_circ_000727	Bra027327	A05	+	21051445	21051667	223	antisense
novel_circ_000728	Bra034705	A05	-	21785686	21785847	162	antisense
novel_circ_000729	Bra034705	A05	-	21785686	21785928	243	antisense
novel_circ_000730	NA	A05	+	21986118	21986358	241	intergenic
novel_circ_000731	NA	A05	+	22076032	22078599	2568	intergenic
novel_circ_000732	Bra034777	A05	+	22102503	22102758	256	one_exon
novel_circ_000733	Bra034805	A05	+	22232090	22232479	390	one_exon
novel_circ_000734	Bra034808	A05	-	22243939	22244614	676	antisense
novel_circ_000735	Bra034822	A05	-	22307370	22307557	188	antisense
novel_circ_000736	Bra034829	A05	+	22349620	22350317	530	annot_exons
novel_circ_000737	Bra034841	A05	-	22394087	22394266	180	antisense
novel_circ_000738	Bra029870	A05	-	22650581	22650837	257	one_exon
novel_circ_000739	Bra029862	A05	-	22688010	22688233	224	antisense
novel_circ_000740	Bra029794	A05	-	22979248	22979488	241	one_exon
novel_circ_000741	Bra029753	A05	-	23138937	23139595	659	antisense
novel_circ_000742	Bra029739	A05	-	23187786	23188025	240	one_exon
novel_circ_000743	Bra029718	A05	-	23256854	23259089	2236	exon_intron
novel_circ_000744	Bra029718	A05	+	23256854	23259089	2236	antisense
novel_circ_000745	Bra029717	A05	+	23259836	23266055	4761	exon_intron
novel_circ_000746	Bra029651	A05	-	23533555	23533765	211	one_exon
novel_circ_000747	Bra029604	A05	+	23767779	23767959	181	antisense
novel_circ_000748	Bra020748	A05	-	23949080	23949449	370	antisense
novel_circ_000749	Bra020752	A05	-	23970772	23971178	407	antisense
novel_circ_000750	NA	A05	-	23999506	24004232	4727	intergenic
novel_circ_000751	Bra020801	A05	+	24172926	24173165	240	one_exon
novel_circ_000752	Bra031967	A05	-	24593304	24593722	334	annot_exons
novel_circ_000753	Bra031967	A05	-	24593467	24593714	248	one_exon
novel_circ_000754	Bra031967	A05	-	24593467	24593720	254	one_exon
novel_circ_000755	Bra031967	A05	-	24593467	24593722	256	one_exon
novel_circ_000756	Bra032022	A05	-	24845019	24845281	263	one_exon
novel_circ_000757	Bra032022	A05	-	24848543	24848693	151	one_exon
novel_circ_000758	Bra039172	A05	-	25000736	25000882	147	one_exon
novel_circ_000759	Bra039152	A05	+	25106310	25110562	4102	exon_intron
novel_circ_000760	Bra039144	A05	-	25143271	25143417	147	exon_intron
novel_circ_000761	Bra039140	A05	-	25158180	25158329	150	one_exon
novel_circ_000762	Bra039124	A05	+	25215029	25215314	286	antisense
novel_circ_000763	Bra037982	A06	-	299893	300405	513	antisense
novel_circ_000764	Bra039691	A06	-	518140	518342	203	antisense
novel_circ_000765	Bra018991	A06	-	863513	863846	334	one_exon
novel_circ_000766	Bra018963	A06	+	1009456	1009638	183	antisense
novel_circ_000767	Bra018851	A06	-	1616291	1617811	1016	annot_exons
novel_circ_000768	Bra018836	A06	-	1696152	1696374	223	antisense
novel_circ_000769	Bra018835	A06	+	1704172	1708911	4740	exon_intron
novel_circ_000770	Bra018828	A06	+	1748126	1748299	174	one_exon
novel_circ_000771	Bra018808	A06	-	1830592	1832468	1877	exon_intron
novel_circ_000772	Bra018806	A06	-	1838105	1855480	12030	exon_intron
novel_circ_000773	Bra018805	A06	+	1844450	1870581	24989	exon_intron
novel_circ_000774	Bra018744	A06	-	2238868	2239660	793	antisense
novel_circ_000775	Bra018677	A06	-	2679389	2679896	508	antisense
novel_circ_000776	Bra018656	A06	-	2797060	2797361	302	antisense
novel_circ_000777	Bra018606	A06	+	3028008	3028175	168	antisense
novel_circ_000778	Bra018581	A06	-	3142921	3143138	118	annot_exons
novel_circ_000779	Bra019996	A06	-	3345630	3345812	183	one_exon
novel_circ_000780	Bra019981	A06	+	3406988	3407374	387	antisense
novel_circ_000781	Bra019874	A06	-	3934004	3939439	5436	exon_intron
novel_circ_000782	Bra019874	A06	+	3934004	3939439	5436	antisense
novel_circ_000783	Bra019865	A06	-	3972779	3978903	5870	exon_intron
novel_circ_000784	Bra019866	A06	+	3972779	3978903	5684	exon_intron
novel_circ_000785	Bra019865	A06	-	3972864	3978914	5796	exon_intron
novel_circ_000786	Bra019850	A06	-	4028786	4028966	181	one_exon
novel_circ_000787	Bra019850	A06	+	4028793	4029058	266	antisense
novel_circ_000788	Bra019850	A06	+	4028808	4028999	192	antisense
novel_circ_000789	Bra019850	A06	-	4028808	4028999	192	one_exon
novel_circ_000790	Bra019850	A06	+	4028841	4029112	272	antisense
novel_circ_000791	Bra019850	A06	+	4028844	4029024	181	antisense
novel_circ_000792	Bra019850	A06	-	4028844	4029062	219	one_exon
novel_circ_000793	Bra019850	A06	+	4028844	4029277	434	antisense
novel_circ_000794	Bra019826	A06	+	4169138	4169389	252	one_exon
novel_circ_000795	Bra019820	A06	+	4240365	4246807	6443	exon_intron
novel_circ_000796	Bra019820	A06	+	4240369	4246811	6443	exon_intron
novel_circ_000797	Bra019784	A06	+	4430992	4431173	182	antisense
novel_circ_000798	Bra019784	A06	-	4430992	4431173	182	one_exon
novel_circ_000799	NA	A06	+	4810995	4811429	435	intergenic
novel_circ_000800	Bra019689	A06	+	4969794	4986298	14463	exon_intron
novel_circ_000801	NA	A06	+	5338863	5339053	191	intergenic
novel_circ_000802	Bra026194	A06	+	5358937	5359261	325	antisense
novel_circ_000803	Bra026192	A06	+	5370316	5370874	559	antisense
novel_circ_000804	Bra026192	A06	-	5370321	5370842	522	one_exon
novel_circ_000805	Bra026192	A06	-	5370500	5370837	338	one_exon
novel_circ_000806	Bra026192	A06	-	5370610	5370934	325	exon_intron
novel_circ_000807	Bra026187	A06	+	5391014	5391227	214	antisense
novel_circ_000808	Bra026108	A06	-	5786689	5794647	7342	exon_intron
novel_circ_000809	Bra026106	A06	-	5787456	5795472	7146	exon_intron
novel_circ_000810	Bra026106	A06	+	5787456	5795472	8017	antisense
novel_circ_000811	Bra026106	A06	-	5787461	5795477	7146	exon_intron
novel_circ_000812	Bra026106	A06	+	5787461	5795477	8017	antisense
novel_circ_000813	Bra026106	A06	-	5788454	5796305	6880	exon_intron
novel_circ_000814	Bra026106	A06	-	5789107	5796780	6521	exon_intron
novel_circ_000815	Bra026106	A06	-	5789245	5796780	6383	exon_intron
novel_circ_000816	Bra026106	A06	+	5793663	5799284	5622	antisense
novel_circ_000817	Bra026106	A06	-	5793816	5799272	2361	annot_exons
novel_circ_000818	Bra026105	A06	-	5804118	5814629	8050	exon_intron
novel_circ_000819	Bra026105	A06	-	5804839	5814888	8007	exon_intron
novel_circ_000820	Bra026105	A06	-	5804839	5817197	917	annot_exons
novel_circ_000821	Bra026105	A06	+	5805107	5806480	1374	antisense
novel_circ_000822	Bra026105	A06	+	5805820	5815803	9984	antisense
novel_circ_000823	Bra026084	A06	+	5912546	5912845	300	antisense
novel_circ_000824	Bra026009	A06	-	6243037	6243210	174	one_exon
novel_circ_000825	Bra025982	A06	+	6352882	6353414	338	annot_exons
novel_circ_000826	Bra025975	A06	-	6395223	6396330	864	exon_intron
novel_circ_000827	Bra025961	A06	-	6443358	6444011	654	antisense
novel_circ_000828	Bra025951	A06	+	6505893	6515943	2019	annot_exons
novel_circ_000829	Bra025949	A06	-	6530801	6540956	10156	antisense
novel_circ_000830	NA	A06	+	6533301	6534349	1049	intergenic
novel_circ_000831	Bra025932	A06	-	6628106	6631204	3099	intronic
novel_circ_000832	Bra025917	A06	+	6710295	6710617	323	exon_intron
novel_circ_000833	Bra025911	A06	+	6751140	6751736	597	exon_intron
novel_circ_000834	Bra025683	A06	+	6985872	6986423	552	one_exon
novel_circ_000835	Bra025683	A06	-	6985872	6986423	552	antisense
novel_circ_000836	Bra025703	A06	+	7101521	7101925	405	one_exon
novel_circ_000837	Bra025713	A06	-	7151880	7152362	483	antisense
novel_circ_000838	Bra025717	A06	-	7166835	7170179	3014	exon_intron
novel_circ_000839	Bra025717	A06	+	7166845	7170189	3345	antisense
novel_circ_000840	Bra025720	A06	+	7174419	7175042	624	antisense
novel_circ_000841	Bra025777	A06	-	7632386	7632635	250	one_exon
novel_circ_000842	Bra025805	A06	-	7803588	7808589	5002	intronic
novel_circ_000843	Bra025819	A06	-	7930897	7931263	367	one_exon
novel_circ_000844	Bra025819	A06	-	7930899	7931261	363	one_exon
novel_circ_000845	Bra025819	A06	-	7930900	7931235	336	one_exon
novel_circ_000846	Bra025819	A06	-	7930973	7931264	292	one_exon
novel_circ_000847	Bra025819	A06	-	7931100	7931287	188	one_exon
novel_circ_000848	Bra025827	A06	+	7970100	7970620	521	antisense
novel_circ_000849	Bra025862	A06	+	8246469	8246651	183	one_exon
novel_circ_000850	NA	A06	+	8260995	8261197	203	intergenic
novel_circ_000851	Bra025863	A06	+	8264474	8264680	207	one_exon
novel_circ_000852	Bra025874	A06	-	8338532	8341565	2946	exon_intron
novel_circ_000853	Bra025889	A06	+	8442795	8443019	225	antisense
novel_circ_000854	NA	A06	-	8676465	8676834	370	intergenic
novel_circ_000855	Bra017940	A06	-	8680308	8680539	232	antisense
novel_circ_000856	Bra017969	A06	-	8862352	8891572	27244	exon_intron
novel_circ_000857	Bra017966	A06	+	8862352	8891572	28447	exon_intron
novel_circ_000858	Bra017971	A06	-	8892392	8892712	321	antisense
novel_circ_000859	Bra018030	A06	+	9338305	9338532	228	one_exon
novel_circ_000860	Bra018030	A06	+	9341468	9341680	213	exon_intron
novel_circ_000861	NA	A06	+	9690253	9690647	395	intergenic
novel_circ_000862	Bra018085	A06	+	9838059	9838241	183	one_exon
novel_circ_000863	Bra018137	A06	-	10223553	10223830	278	one_exon
novel_circ_000864	Bra018137	A06	+	10223733	10223989	257	antisense
novel_circ_000865	Bra018185	A06	+	10597958	10598155	198	one_exon
novel_circ_000866	Bra018204	A06	+	10739592	10739922	331	antisense
novel_circ_000867	Bra038281	A06	-	11113892	11114192	204	exon_intron
novel_circ_000868	Bra038296	A06	-	11280942	11281427	486	antisense
novel_circ_000869	Bra038299	A06	+	11307077	11307471	319	annot_exons
novel_circ_000870	Bra019416	A06	+	11410415	11499408	87976	exon_intron
novel_circ_000871	Bra019431	A06	-	11624140	11624583	310	annot_exons
novel_circ_000872	Bra019435	A06	+	11701538	11726686	24848	exon_intron
novel_circ_000873	Bra019435	A06	+	11705147	11725634	20187	exon_intron
novel_circ_000874	Bra019468	A06	-	12222041	12222228	188	one_exon
novel_circ_000875	NA	A06	-	12449048	12455222	6175	intergenic
novel_circ_000876	NA	A06	-	12642284	12642987	704	intergenic
novel_circ_000877	NA	A06	+	12642290	12642465	176	intergenic
novel_circ_000878	NA	A06	+	12642717	12643244	528	intergenic
novel_circ_000879	NA	A06	+	12642717	12643420	704	intergenic
novel_circ_000880	Bra019613	A06	+	13724959	13725123	165	antisense
novel_circ_000881	Bra019621	A06	-	13777244	13777551	308	antisense
novel_circ_000882	Bra010049	A06	+	13867312	13867601	290	exon_intron
novel_circ_000883	Bra010070	A06	+	14152690	14153016	327	one_exon
novel_circ_000884	Bra010070	A06	+	14152693	14153016	324	one_exon
novel_circ_000885	Bra010070	A06	+	14152696	14153016	321	one_exon
novel_circ_000886	Bra010075	A06	+	14200936	14201364	429	one_exon
novel_circ_000887	Bra010096	A06	+	14377928	14378303	376	exon_intron
novel_circ_000888	Bra010106	A06	+	14431315	14431616	302	antisense
novel_circ_000889	Bra010108	A06	+	14450742	14450990	249	antisense
novel_circ_000890	Bra010108	A06	+	14450781	14450990	210	antisense
novel_circ_000891	Bra010108	A06	+	14450793	14450987	195	antisense
novel_circ_000892	Bra010108	A06	+	14450793	14450990	198	antisense
novel_circ_000893	Bra010108	A06	+	14450793	14450993	201	antisense
novel_circ_000894	Bra010108	A06	+	14451335	14451511	177	antisense
novel_circ_000895	Bra010111	A06	-	14467823	14468062	240	exon_intron
novel_circ_000896	Bra010124	A06	+	14556407	14556672	266	one_exon
novel_circ_000897	NA	A06	-	15119823	15121193	1371	intergenic
novel_circ_000898	NA	A06	+	15119828	15121198	1371	intergenic
novel_circ_000899	NA	A06	-	15257375	15257832	458	intergenic
novel_circ_000900	Bra024295	A06	-	15388547	15388866	320	one_exon
novel_circ_000901	Bra024369	A06	-	15874587	15875411	733	exon_intron
novel_circ_000902	Bra024404	A06	-	16170746	16170886	141	antisense
novel_circ_000903	Bra024428	A06	+	16360545	16360761	217	one_exon
novel_circ_000904	Bra024428	A06	+	16360551	16360761	211	one_exon
novel_circ_000905	Bra024449	A06	+	16441647	16442075	429	antisense
novel_circ_000906	Bra024449	A06	-	16441693	16441884	192	one_exon
novel_circ_000907	NA	A06	-	16930065	16931755	1691	intergenic
novel_circ_000908	Bra009659	A06	+	17040888	17041108	221	exon_intron
novel_circ_000909	Bra009686	A06	+	17169871	17170131	261	antisense
novel_circ_000910	Bra009709	A06	-	17295994	17296638	645	antisense
novel_circ_000911	Bra009709	A06	+	17295994	17296638	166	annot_exons
novel_circ_000912	Bra009712	A06	-	17320738	17321127	390	antisense
novel_circ_000913	Bra009764	A06	+	17693732	17709514	15783	antisense
novel_circ_000914	Bra009774	A06	-	17790477	17790676	200	exon_intron
novel_circ_000915	Bra009915	A06	+	18677880	18678239	360	one_exon
novel_circ_000916	Bra009915	A06	+	18677883	18678239	357	one_exon
novel_circ_000917	Bra010032	A06	-	19359867	19361869	1153	exon_intron
novel_circ_000918	Bra010138	A06	+	19434296	19523209	88516	exon_intron
novel_circ_000919	Bra010149	A06	+	19760934	19848197	87146	exon_intron
novel_circ_000920	Bra010149	A06	-	19760934	19848197	87264	antisense
novel_circ_000921	Bra010149	A06	+	19760934	19857277	96226	exon_intron
novel_circ_000922	Bra010149	A06	-	19760934	19857277	96344	antisense
novel_circ_000923	Bra010149	A06	-	19760938	19857343	96406	antisense
novel_circ_000924	Bra010149	A06	-	19785913	19848197	62285	antisense
novel_circ_000925	Bra010149	A06	-	19785913	19857277	71365	antisense
novel_circ_000926	Bra010149	A06	+	19785913	19857277	71247	exon_intron
novel_circ_000927	Bra010149	A06	+	19785917	19848242	62208	exon_intron
novel_circ_000928	Bra010149	A06	+	19785918	19848243	62208	exon_intron
novel_circ_000929	Bra010149	A06	+	19785928	19848222	62177	exon_intron
novel_circ_000930	Bra010149	A06	+	19785928	19857302	71257	exon_intron
novel_circ_000931	Bra010149	A06	+	19785936	19857750	71697	exon_intron
novel_circ_000932	Bra010149	A06	+	19785936	19858149	72096	exon_intron
novel_circ_000933	Bra010149	A06	+	19785936	19858548	72495	exon_intron
novel_circ_000934	Bra010149	A06	+	19785936	19858947	72894	exon_intron
novel_circ_000935	Bra010149	A06	+	19785936	19859346	73293	exon_intron
novel_circ_000936	Bra010149	A06	+	19785936	19859745	73692	exon_intron
novel_circ_000937	Bra010149	A06	-	19785936	19859745	73810	antisense
novel_circ_000938	Bra010149	A06	+	19785936	19860144	74091	exon_intron
novel_circ_000939	Bra010149	A06	+	19785938	19848263	62208	exon_intron
novel_circ_000940	NA	A06	-	19785944	19793145	7202	intergenic
novel_circ_000941	Bra010149	A06	+	19785949	19848222	62156	exon_intron
novel_circ_000942	Bra010149	A06	+	19785949	19857250	71184	exon_intron
novel_circ_000943	NA	A06	-	19887248	19900707	13460	intergenic
novel_circ_000944	NA	A06	-	19887823	19893967	6145	intergenic
novel_circ_000945	NA	A06	-	19888063	19894344	6282	intergenic
novel_circ_000946	NA	A06	+	19899138	19933196	34059	intergenic
novel_circ_000947	Bra037449	A06	+	20127430	20142230	14581	exon_intron
novel_circ_000948	Bra037452	A06	+	20127430	20173766	46337	exon_intron
novel_circ_000949	Bra037452	A06	+	20127940	20163277	35338	exon_intron
novel_circ_000950	Bra037451	A06	-	20127940	20163277	34674	exon_intron
novel_circ_000951	Bra037451	A06	-	20131115	20146183	14405	exon_intron
novel_circ_000952	Bra037451	A06	-	20131115	20146359	14581	exon_intron
novel_circ_000953	Bra037449	A06	+	20131115	20146359	15025	exon_intron
novel_circ_000954	Bra037449	A06	+	20131115	20146535	15201	exon_intron
novel_circ_000955	Bra037451	A06	-	20131536	20146249	14050	exon_intron
novel_circ_000956	Bra037449	A06	+	20131536	20146249	14494	exon_intron
novel_circ_000957	Bra037451	A06	-	20131536	20146425	14226	exon_intron
novel_circ_000958	Bra037449	A06	+	20131536	20146425	14670	exon_intron
novel_circ_000959	Bra037449	A06	+	20131595	20146290	14476	exon_intron
novel_circ_000960	Bra037451	A06	-	20131595	20146466	14208	exon_intron
novel_circ_000961	Bra037449	A06	+	20131595	20146466	14652	exon_intron
novel_circ_000962	Bra037449	A06	+	20131595	20146642	14828	exon_intron
novel_circ_000963	Bra037451	A06	-	20131595	20146642	14384	exon_intron
novel_circ_000964	Bra037449	A06	+	20131598	20146310	14493	exon_intron
novel_circ_000965	Bra037449	A06	+	20131598	20146486	14669	exon_intron
novel_circ_000966	Bra037449	A06	+	20131957	20146310	14134	exon_intron
novel_circ_000967	Bra037449	A06	+	20131957	20146486	14310	exon_intron
novel_circ_000968	Bra037449	A06	+	20131957	20146662	14486	exon_intron
novel_circ_000969	Bra037451	A06	-	20132279	20143752	10810	exon_intron
novel_circ_000970	Bra037451	A06	-	20132279	20143831	10889	exon_intron
novel_circ_000971	Bra037451	A06	-	20132279	20143888	10946	exon_intron
novel_circ_000972	Bra037451	A06	-	20132279	20163957	31015	exon_intron
novel_circ_000973	NA	A06	+	20146487	20146662	176	intergenic
novel_circ_000974	Bra037489	A06	-	20325846	20326247	402	exon_intron
novel_circ_000975	Bra037489	A06	+	20326038	20326242	205	antisense
novel_circ_000976	Bra037520	A06	+	20456601	20456859	259	antisense
novel_circ_000977	Bra025421	A06	-	20539670	20540878	1209	antisense
novel_circ_000978	Bra025330	A06	-	21047434	21057763	9303	exon_intron
novel_circ_000979	Bra025331	A06	+	21047447	21057776	9385	exon_intron
novel_circ_000980	Bra025326	A06	-	21086391	21086770	380	antisense
novel_circ_000981	Bra025323	A06	-	21098101	21098308	208	one_exon
novel_circ_000982	Bra025323	A06	-	21098175	21098309	135	one_exon
novel_circ_000983	Bra025323	A06	+	21098175	21098309	135	antisense
novel_circ_000984	Bra025266	A06	-	21418924	21419782	611	exon_intron
novel_circ_000985	Bra025211	A06	-	21665802	21666117	316	antisense
novel_circ_000986	Bra025211	A06	+	21666175	21666387	213	one_exon
novel_circ_000987	Bra025173	A06	-	21877326	21877732	407	one_exon
novel_circ_000988	Bra025136	A06	-	22218288	22218511	224	intronic
novel_circ_000989	Bra025136	A06	-	22218288	22218681	394	intronic
novel_circ_000990	Bra025136	A06	-	22218288	22219283	996	exon_intron
novel_circ_000991	Bra025136	A06	-	22218288	22219538	1251	exon_intron
novel_circ_000992	Bra025136	A06	-	22218440	22219538	1099	exon_intron
novel_circ_000993	Bra025136	A06	-	22219026	22219538	513	exon_intron
novel_circ_000994	NA	A06	-	22480974	22485310	4337	intergenic
novel_circ_000995	NA	A06	+	22480974	22485310	4337	intergenic
novel_circ_000996	NA	A06	+	22838679	22838829	151	intergenic
novel_circ_000997	NA	A06	-	22885977	22886170	194	intergenic
novel_circ_000998	Bra024865	A06	-	22899250	22899452	203	antisense
novel_circ_000999	NA	A06	-	22961355	22962406	1052	intergenic
novel_circ_001000	Bra024879	A06	-	22982167	22982586	420	exon_intron
novel_circ_001001	Bra024879	A06	-	22982199	22982436	238	exon_intron
novel_circ_001002	Bra024879	A06	-	22982423	22982845	309	annot_exons
novel_circ_001003	Bra024879	A06	-	22982451	22982854	290	annot_exons
novel_circ_001004	Bra024879	A06	+	22982451	22982854	404	antisense
novel_circ_001005	Bra024899	A06	+	23109526	23109796	271	antisense
novel_circ_001006	Bra024912	A06	-	23160199	23160379	181	one_exon
novel_circ_001007	Bra024912	A06	+	23162060	23162590	531	antisense
novel_circ_001008	Bra024951	A06	-	23297430	23297692	263	exon_intron
novel_circ_001009	Bra024968	A06	+	23399112	23399432	218	annot_exons
novel_circ_001010	Bra025042	A06	+	23784191	23784530	340	antisense
novel_circ_001011	Bra025104	A06	+	24115385	24115706	231	annot_exons
novel_circ_001012	Bra033742	A06	-	24248759	24254708	5950	antisense
novel_circ_001013	Bra033724	A06	-	24355190	24355582	393	one_exon
novel_circ_001014	Bra033662	A06	-	24693941	24694137	197	antisense
novel_circ_001015	Bra033662	A06	+	24693941	24694137	197	one_exon
novel_circ_001016	Bra033651	A06	+	24747029	24747237	209	exon_intron
novel_circ_001017	Bra033559	A06	+	25177026	25177493	383	annot_exons
novel_circ_001018	Bra036480	A07	+	157359	157673	315	one_exon
novel_circ_001019	Bra039009	A07	-	661033	665142	3527	exon_intron
novel_circ_001020	NA	A07	-	735434	736172	739	intergenic
novel_circ_001021	Bra038842	A07	-	928033	928409	377	one_exon
novel_circ_001022	Bra038835	A07	-	986219	986531	225	annot_exons
novel_circ_001023	Bra038830	A07	+	1054126	1054360	235	one_exon
novel_circ_001024	Bra039619	A07	+	1498652	1499402	751	antisense
novel_circ_001025	NA	A07	-	2264460	2265200	741	intergenic
novel_circ_001026	NA	A07	+	2264460	2265200	741	intergenic
novel_circ_001027	NA	A07	-	2264524	2265054	531	intergenic
novel_circ_001028	NA	A07	-	2264524	2265126	603	intergenic
novel_circ_001029	NA	A07	-	2264529	2265054	526	intergenic
novel_circ_001030	NA	A07	-	2264529	2265105	577	intergenic
novel_circ_001031	NA	A07	-	2264529	2265126	598	intergenic
novel_circ_001032	Bra001980	A07	-	2887653	2888105	453	antisense
novel_circ_001033	NA	A07	-	3407693	3412706	5014	intergenic
novel_circ_001034	NA	A07	+	3591428	3591603	176	intergenic
novel_circ_001035	NA	A07	+	3591437	3591612	176	intergenic
novel_circ_001036	NA	A07	+	4516870	4526797	9928	intergenic
novel_circ_001037	NA	A07	+	4518128	4527762	9635	intergenic
novel_circ_001038	NA	A07	-	4616148	4620668	4521	intergenic
novel_circ_001039	NA	A07	-	5026486	5028555	2070	intergenic
novel_circ_001040	Bra015102	A07	+	5690607	5690786	180	antisense
novel_circ_001041	Bra015065	A07	+	6043402	6043751	266	annot_exons
novel_circ_001042	Bra015053	A07	+	6135481	6136059	579	antisense
novel_circ_001043	Bra015053	A07	+	6135721	6135948	228	antisense
novel_circ_001044	Bra015013	A07	+	6503601	6503889	289	antisense
novel_circ_001045	Bra014893	A07	-	7699706	7699913	208	one_exon
novel_circ_001046	Bra030169	A07	-	8197970	8206808	8839	antisense
novel_circ_001047	NA	A07	-	8375962	8376936	975	intergenic
novel_circ_001048	Bra030141	A07	-	8465621	8471486	5782	exon_intron
novel_circ_001049	Bra030140	A07	+	8465621	8471486	5866	exon_intron
novel_circ_001050	Bra030102	A07	+	8771222	8771391	170	one_exon
novel_circ_001051	Bra030095	A07	-	8836155	8836420	266	antisense
novel_circ_001052	Bra030082	A07	-	8935075	8935349	275	antisense
novel_circ_001053	Bra030074	A07	-	8991417	8991794	378	one_exon
novel_circ_001054	Bra030037	A07	-	9239376	9239543	168	one_exon
novel_circ_001055	Bra012479	A07	+	9536616	9536914	299	antisense
novel_circ_001056	Bra012458	A07	-	9726428	9726695	268	exon_intron
novel_circ_001057	Bra012437	A07	-	9829045	9829317	273	one_exon
novel_circ_001058	Bra012426	A07	-	9982053	9982238	186	one_exon
novel_circ_001059	Bra012418	A07	+	10017441	10017649	209	one_exon
novel_circ_001060	Bra012418	A07	-	10017441	10017649	209	antisense
novel_circ_001061	Bra012389	A07	-	10277010	10283093	5920	exon_intron
novel_circ_001062	Bra012310	A07	-	10852541	10852697	157	one_exon
novel_circ_001063	Bra012274	A07	-	11136817	11137068	252	antisense
novel_circ_001064	Bra012274	A07	-	11137506	11137733	228	antisense
novel_circ_001065	Bra012272	A07	+	11143266	11143453	188	antisense
novel_circ_001066	Bra012268	A07	+	11180507	11180902	396	exon_intron
novel_circ_001067	Bra012238	A07	-	11368092	11369053	604	exon_intron
novel_circ_001068	Bra012223	A07	-	11442153	11454645	12015	exon_intron
novel_circ_001069	Bra012222	A07	+	11442153	11454645	10653	exon_intron
novel_circ_001070	Bra012219	A07	+	11442481	11465084	18385	exon_intron
novel_circ_001071	NA	A07	-	11602236	11604837	2602	intergenic
novel_circ_001072	NA	A07	+	11602236	11604837	2602	intergenic
novel_circ_001073	Bra012150	A07	-	11951131	11951379	249	antisense
novel_circ_001074	Bra012092	A07	+	12304527	12304845	319	antisense
novel_circ_001075	Bra012087	A07	-	12327854	12328171	318	one_exon
novel_circ_001076	NA	A07	+	12860560	12861045	486	intergenic
novel_circ_001077	Bra011981	A07	+	13013877	13014290	414	one_exon
novel_circ_001078	Bra028400	A07	+	13751636	13752105	309	exon_intron
novel_circ_001079	Bra028455	A07	+	14106846	14107514	669	antisense
novel_circ_001080	Bra028459	A07	-	14135280	14135764	288	annot_exons
novel_circ_001081	Bra028506	A07	+	14457781	14457951	171	one_exon
novel_circ_001082	Bra028523	A07	+	14546862	14547178	317	one_exon
novel_circ_001083	Bra028523	A07	+	14546867	14547181	315	one_exon
novel_circ_001084	Bra028523	A07	-	14546913	14547242	330	antisense
novel_circ_001085	Bra003127	A07	-	14762316	14762514	199	one_exon
novel_circ_001086	Bra003129	A07	-	14780812	14780997	186	antisense
novel_circ_001087	Bra003185	A07	+	15007901	15014820	6920	exon_intron
novel_circ_001088	Bra003194	A07	+	15071150	15071418	269	one_exon
novel_circ_001089	NA	A07	+	15392449	15392637	189	intergenic
novel_circ_001090	Bra003267	A07	+	15550685	15550813	129	one_exon
novel_circ_001091	Bra003288	A07	+	15681566	15683536	1514	exon_intron
novel_circ_001092	Bra003382	A07	-	16211212	16211808	597	antisense
novel_circ_001093	Bra003414	A07	+	16366893	16367231	339	exon_intron
novel_circ_001094	Bra003427	A07	-	16427982	16431340	2806	exon_intron
novel_circ_001095	NA	A07	+	16690347	16690597	251	intergenic
novel_circ_001096	Bra003504	A07	+	16787857	16788153	297	one_exon
novel_circ_001097	Bra003569	A07	+	17114247	17114587	341	antisense
novel_circ_001098	Bra003585	A07	+	17208194	17208375	182	one_exon
novel_circ_001099	Bra003588	A07	+	17231252	17231444	193	exon_intron
novel_circ_001100	Bra003615	A07	-	17365137	17365349	213	one_exon
novel_circ_001101	Bra003645	A07	+	17499040	17499429	390	exon_intron
novel_circ_001102	Bra003670	A07	-	17646677	17646970	294	antisense
novel_circ_001103	Bra003678	A07	+	17704550	17705202	480	annot_exons
novel_circ_001104	Bra003699	A07	-	17851247	17851570	324	antisense
novel_circ_001105	Bra003770	A07	+	18271991	18274774	2695	exon_intron
novel_circ_001106	Bra003785	A07	+	18324567	18324805	239	one_exon
novel_circ_001107	Bra003849	A07	+	18631463	18632621	1159	intronic
novel_circ_001108	Bra003849	A07	+	18631691	18632849	1159	intronic
novel_circ_001109	Bra003849	A07	+	18632021	18634701	2283	exon_intron
novel_circ_001110	Bra003869	A07	+	18744514	18744624	111	antisense
novel_circ_001111	Bra003965	A07	-	19280626	19280922	297	exon_intron
novel_circ_001112	Bra003967	A07	-	19288800	19289326	455	annot_exons
novel_circ_001113	Bra004022	A07	+	19647408	19648062	655	antisense
novel_circ_001114	NA	A07	+	19647775	19647936	162	intergenic
novel_circ_001115	Bra004105	A07	+	20151670	20152033	279	annot_exons
novel_circ_001116	Bra016238	A07	-	21978641	21978860	220	antisense
novel_circ_001117	Bra016234	A07	-	21995938	21996774	837	one_exon
novel_circ_001118	Bra016233	A07	-	21998181	21998438	258	one_exon
novel_circ_001119	Bra016233	A07	+	21999578	21999754	177	antisense
novel_circ_001120	Bra016230	A07	-	22011118	22011413	296	antisense
novel_circ_001121	Bra016224	A07	+	22071149	22071339	191	antisense
novel_circ_001122	Bra016127	A07	+	22581394	22581810	417	one_exon
novel_circ_001123	Bra016127	A07	-	22581458	22581682	225	antisense
novel_circ_001124	Bra016097	A07	-	22712884	22713129	246	antisense
novel_circ_001125	Bra016081	A07	-	22806498	22806688	191	antisense
novel_circ_001126	Bra016063	A07	+	22883825	22884260	436	one_exon
novel_circ_001127	Bra016063	A07	+	22883827	22884262	436	one_exon
novel_circ_001128	Bra016053	A07	+	22936445	22937316	872	antisense
novel_circ_001129	Bra015937	A07	+	23421215	23421751	537	antisense
novel_circ_001130	Bra015839	A07	-	23865003	23865207	205	one_exon
novel_circ_001131	Bra015779	A07	-	24176773	24177015	243	one_exon
novel_circ_001132	Bra015779	A07	+	24176837	24177042	206	antisense
novel_circ_001133	NA	A07	-	24273949	24274137	189	intergenic
novel_circ_001134	Bra015739	A07	-	24364146	24364345	200	antisense
novel_circ_001135	Bra015739	A07	-	24364262	24364648	387	antisense
novel_circ_001136	Bra015739	A07	-	24364268	24364648	381	antisense
novel_circ_001137	Bra015739	A07	-	24364271	24364648	378	antisense
novel_circ_001138	Bra015739	A07	+	24364275	24364655	381	one_exon
novel_circ_001139	Bra015739	A07	+	24364434	24364675	242	one_exon
novel_circ_001140	Bra015727	A07	-	24430771	24431067	297	one_exon
novel_circ_001141	Bra015723	A07	+	24443105	24449463	6359	antisense
novel_circ_001142	Bra015723	A07	+	24443109	24449463	6355	antisense
novel_circ_001143	NA	A07	+	24526437	24526625	189	intergenic
novel_circ_001144	NA	A07	+	24526472	24526636	165	intergenic
novel_circ_001145	NA	A07	-	24526472	24526636	165	intergenic
novel_circ_001146	Bra015656	A07	+	24790590	24791487	898	antisense
novel_circ_001147	Bra015654	A07	-	24819361	24819543	183	one_exon
novel_circ_001148	Bra015641	A07	+	24883141	24883361	221	one_exon
novel_circ_001149	Bra035041	A07	-	25208512	25213911	5400	antisense
novel_circ_001150	Bra035041	A07	-	25208512	25214454	5943	antisense
novel_circ_001151	Bra035041	A07	+	25210651	25213960	3310	intronic
novel_circ_001152	Bra035041	A07	-	25210651	25213960	3310	antisense
novel_circ_001153	Bra035041	A07	-	25210651	25214503	3853	antisense
novel_circ_001154	Bra035041	A07	+	25210651	25214503	3853	intronic
novel_circ_001155	Bra035052	A07	-	25255299	25255592	294	one_exon
novel_circ_001156	Bra030820	A08	+	89011	92309	233	annot_exons
novel_circ_001157	Bra030891	A08	+	580263	604874	24612	exon_intron
novel_circ_001158	Bra030945	A08	-	989167	989684	518	antisense
novel_circ_001159	Bra014346	A08	-	1491042	1491207	166	antisense
novel_circ_001160	Bra014346	A08	-	1491042	1491375	334	antisense
novel_circ_001161	Bra014286	A08	-	1929616	1951396	21781	exon_intron
novel_circ_001162	Bra014239	A08	+	2286273	2286611	223	annot_exons
novel_circ_001163	Bra014219	A08	-	2436188	2436457	270	one_exon
novel_circ_001164	Bra014110	A08	-	3369157	3403298	33318	exon_intron
novel_circ_001165	Bra014050	A08	-	4098898	4099027	130	one_exon
novel_circ_001166	Bra014043	A08	+	4187621	4187884	264	antisense
novel_circ_001167	Bra013994	A08	+	4784879	4804479	19519	exon_intron
novel_circ_001168	Bra034941	A08	+	5058160	5058382	223	one_exon
novel_circ_001169	Bra039727	A08	+	6386064	6386295	232	one_exon
novel_circ_001170	NA	A08	-	7121335	7123464	2130	intergenic
novel_circ_001171	NA	A08	-	7121338	7123467	2130	intergenic
novel_circ_001172	NA	A08	+	7121338	7123467	2130	intergenic
novel_circ_001173	NA	A08	-	7933131	7940801	7671	intergenic
novel_circ_001174	NA	A08	-	8214779	8237644	22866	intergenic
novel_circ_001175	Bra038959	A08	-	8636563	8637771	1209	exon_intron
novel_circ_001176	Bra020946	A08	-	10245699	10245851	153	one_exon
novel_circ_001177	Bra020896	A08	-	10551309	10551505	197	antisense
novel_circ_001178	Bra020836	A08	+	10988777	10989292	516	one_exon
novel_circ_001179	Bra020821	A08	+	11104299	11104536	238	antisense
novel_circ_001180	Bra020819	A08	+	11116675	11117309	466	annot_exons
novel_circ_001181	Bra034648	A08	-	11516743	11517030	288	antisense
novel_circ_001182	Bra034609	A08	+	11764975	11765253	279	one_exon
novel_circ_001183	NA	A08	+	11782212	11782439	228	intergenic
novel_circ_001184	Bra034600	A08	-	11804625	11804849	225	one_exon
novel_circ_001185	Bra034573	A08	-	11981345	11981609	265	exon_intron
novel_circ_001186	Bra034546	A08	+	12101813	12102194	300	annot_exons
novel_circ_001187	Bra040085	A08	+	12264092	12267656	3565	antisense
novel_circ_001188	Bra010293	A08	-	12912884	12913108	225	antisense
novel_circ_001189	Bra010293	A08	+	12912884	12913108	225	one_exon
novel_circ_001190	Bra010318	A08	-	13073643	13074026	384	antisense
novel_circ_001191	Bra010318	A08	-	13073648	13074031	384	antisense
novel_circ_001192	Bra010400	A08	-	13552042	13565170	13129	exon_intron
novel_circ_001193	Bra010402	A08	+	13571575	13571904	330	one_exon
novel_circ_001194	Bra010419	A08	-	13657500	13658329	679	annot_exons
novel_circ_001195	Bra010459	A08	-	13843181	13843738	558	one_exon
novel_circ_001196	Bra010459	A08	+	13844740	13845030	291	antisense
novel_circ_001197	Bra010510	A08	+	14141882	14142154	273	one_exon
novel_circ_001198	Bra010513	A08	-	14159194	14159494	205	annot_exons
novel_circ_001199	Bra010528	A08	+	14214451	14214833	383	antisense
novel_circ_001200	Bra010528	A08	+	14214521	14214833	313	antisense
novel_circ_001201	Bra010528	A08	+	14214524	14214814	291	antisense
novel_circ_001202	Bra010528	A08	-	14214528	14214818	291	one_exon
novel_circ_001203	Bra010532	A08	+	14234782	14235014	233	exon_intron
novel_circ_001204	Bra010569	A08	-	14460580	14460789	210	one_exon
novel_circ_001205	NA	A08	-	14508951	14509295	345	intergenic
novel_circ_001206	Bra010585	A08	-	14555354	14556769	1416	exon_intron
novel_circ_001207	Bra010727	A08	-	15369171	15369350	180	antisense
novel_circ_001208	Bra010748	A08	+	15463899	15464223	325	exon_intron
novel_circ_001209	Bra010782	A08	-	15641572	15647319	5748	exon_intron
novel_circ_001210	Bra010786	A08	+	15670412	15670646	235	one_exon
novel_circ_001211	Bra010810	A08	+	15791602	15791786	185	antisense
novel_circ_001212	Bra010816	A08	+	15820724	15830514	6277	exon_intron
novel_circ_001213	Bra010817	A08	+	15826243	15833254	7012	exon_intron
novel_circ_001214	Bra010817	A08	-	15831256	15840603	9348	antisense
novel_circ_001215	Bra010817	A08	+	15831827	15841012	3061	exon_intron
novel_circ_001216	Bra010830	A08	+	15898157	15899728	1103	annot_exons
novel_circ_001217	NA	A08	-	16027029	16029094	2066	intergenic
novel_circ_001218	NA	A08	-	16029660	16030736	1077	intergenic
novel_circ_001219	Bra010865	A08	-	16062373	16062935	326	exon_intron
novel_circ_001220	Bra010875	A08	+	16112449	16113189	741	antisense
novel_circ_001221	Bra010876	A08	-	16121336	16121788	453	antisense
novel_circ_001222	Bra010878	A08	+	16127378	16127587	210	one_exon
novel_circ_001223	Bra010879	A08	+	16132709	16132887	179	antisense
novel_circ_001224	Bra010951	A08	+	16468748	16474384	5220	exon_intron
novel_circ_001225	Bra011004	A08	+	16777089	16780027	2272	exon_intron
novel_circ_001226	Bra011004	A08	-	16777089	16780027	2939	antisense
novel_circ_001227	Bra011009	A08	+	16796015	16796364	350	antisense
novel_circ_001228	Bra011009	A08	+	16796249	16796398	150	antisense
novel_circ_001229	Bra011019	A08	-	16828482	16828691	210	antisense
novel_circ_001230	Bra011019	A08	-	16828482	16828708	227	antisense
novel_circ_001231	Bra016402	A08	+	17513397	17513696	300	antisense
novel_circ_001232	Bra016413	A08	+	17567837	17568779	943	antisense
novel_circ_001233	Bra016416	A08	-	17580540	17580719	180	antisense
novel_circ_001234	Bra016439	A08	-	17709702	17709999	298	one_exon
novel_circ_001235	Bra016439	A08	+	17709778	17710056	279	antisense
novel_circ_001236	Bra016444	A08	-	17729879	17730385	507	one_exon
novel_circ_001237	Bra016463	A08	-	17819927	17820114	188	antisense
novel_circ_001238	Bra016463	A08	+	17819927	17820114	188	one_exon
novel_circ_001239	Bra016476	A08	+	17875681	17876032	352	antisense
novel_circ_001240	Bra016589	A08	-	18405673	18405895	223	intronic
novel_circ_001241	Bra016669	A08	-	18727214	18727923	710	antisense
novel_circ_001242	Bra016747	A08	-	19023682	19023883	202	one_exon
novel_circ_001243	Bra030755	A08	-	19711557	19711730	174	one_exon
novel_circ_001244	NA	A08	+	19953285	19955371	2087	intergenic
novel_circ_001245	Bra030679	A08	+	20070359	20070570	212	one_exon
novel_circ_001246	Bra030679	A08	-	20070365	20070676	312	antisense
novel_circ_001247	Bra030586	A08	+	20432966	20433437	472	antisense
novel_circ_001248	Bra030561	A08	-	20542423	20542756	334	antisense
novel_circ_001249	NA	A08	+	20589571	20590505	935	intergenic
novel_circ_001250	Bra030526	A08	+	20688028	20688209	182	one_exon
novel_circ_001251	NA	A09	+	821	1041	221	intergenic
novel_circ_001252	Bra037368	A09	-	299770	299956	187	antisense
novel_circ_001253	Bra037401	A09	+	436876	437231	356	one_exon
novel_circ_001254	Bra036326	A09	+	559688	566795	7108	antisense
novel_circ_001255	Bra036307	A09	-	693385	699312	5928	antisense
novel_circ_001256	Bra036257	A09	-	1012700	1013102	403	antisense
novel_circ_001257	Bra036248	A09	-	1049569	1049770	202	one_exon
novel_circ_001258	Bra034241	A09	-	1428015	1434397	6383	exon_intron
novel_circ_001259	Bra034240	A09	+	1428015	1434397	5680	exon_intron
novel_circ_001260	Bra039091	A09	+	1542332	1542455	124	one_exon
novel_circ_001261	Bra036204	A09	-	1939532	1943362	3269	exon_intron
novel_circ_001262	Bra036172	A09	+	2103741	2104013	273	antisense
novel_circ_001263	Bra036172	A09	-	2103741	2104013	273	one_exon
novel_circ_001264	Bra036111	A09	-	2420696	2420941	246	antisense
novel_circ_001265	Bra036620	A09	+	2538553	2538774	222	one_exon
novel_circ_001266	NA	A09	-	2988917	2989437	521	intergenic
novel_circ_001267	Bra035938	A09	+	3433704	3434004	221	annot_exons
novel_circ_001268	Bra035903	A09	-	3599839	3600009	171	one_exon
novel_circ_001269	Bra035886	A09	+	3702836	3715009	12174	antisense
novel_circ_001270	Bra037787	A09	-	4176422	4176600	179	exon_intron
novel_circ_001271	Bra037827	A09	+	4408309	4408613	305	one_exon
novel_circ_001272	Bra037833	A09	+	4439700	4440443	744	antisense
novel_circ_001273	Bra037150	A09	-	4675355	4675544	190	one_exon
novel_circ_001274	Bra037185	A09	+	4817189	4817678	414	exon_intron
novel_circ_001275	Bra037197	A09	+	4915301	4915599	299	one_exon
novel_circ_001276	Bra037296	A09	-	5092135	5092278	144	antisense
novel_circ_001277	Bra037264	A09	+	5283077	5283276	200	exon_intron
novel_circ_001278	Bra037217	A09	+	5584992	5585177	186	antisense
novel_circ_001279	Bra038567	A09	-	5788610	5789678	1069	antisense
novel_circ_001280	Bra036714	A09	+	5898179	5898380	202	one_exon
novel_circ_001281	Bra036642	A09	+	6325600	6325734	135	antisense
novel_circ_001282	Bra027772	A09	-	6716433	6729306	7430	exon_intron
novel_circ_001283	Bra027772	A09	-	6716926	6721276	4351	intronic
novel_circ_001284	Bra027685	A09	-	7369782	7369958	177	antisense
novel_circ_001285	Bra027640	A09	-	7622534	7622877	344	exon_intron
novel_circ_001286	Bra027006	A09	-	7937665	7938112	332	annot_exons
novel_circ_001287	Bra027042	A09	+	8274512	8274772	261	antisense
novel_circ_001288	Bra027042	A09	-	8274545	8274658	114	one_exon
novel_circ_001289	Bra027053	A09	+	8435384	8463931	27735	exon_intron
novel_circ_001290	Bra027073	A09	-	8642232	8642998	767	antisense
novel_circ_001291	Bra027078	A09	-	8683995	8684174	180	antisense
novel_circ_001292	Bra027078	A09	-	8683995	8684177	183	antisense
novel_circ_001293	Bra027104	A09	-	8945174	8945347	174	antisense
novel_circ_001294	Bra027140	A09	-	9179274	9179632	359	antisense
novel_circ_001295	Bra027850	A09	-	9687294	9687557	264	antisense
novel_circ_001296	NA	A09	-	10204421	10205600	1180	intergenic
novel_circ_001297	Bra027964	A09	+	10604491	10604780	290	antisense
novel_circ_001298	NA	A09	-	10666344	10666496	153	intergenic
novel_circ_001299	Bra027442	A09	+	10833254	10833923	526	exon_intron
novel_circ_001300	Bra027465	A09	-	10989943	10990467	339	exon_intron
novel_circ_001301	Bra027468	A09	-	11009283	11009513	231	antisense
novel_circ_001302	Bra027468	A09	-	11010449	11010821	373	antisense
novel_circ_001303	Bra027501	A09	+	11313391	11316628	3238	antisense
novel_circ_001304	Bra027501	A09	+	11313393	11313531	139	antisense
novel_circ_001305	Bra027543	A09	-	11659916	11660209	294	one_exon
novel_circ_001306	Bra027553	A09	-	11731010	11747949	16763	exon_intron
novel_circ_001307	Bra027574	A09	+	11856794	11857110	317	antisense
novel_circ_001308	Bra027582	A09	-	11948121	11948549	429	exon_intron
novel_circ_001309	Bra027594	A09	+	12072615	12072782	168	antisense
novel_circ_001310	NA	A09	-	12178966	12179753	788	intergenic
novel_circ_001311	Bra017486	A09	-	13407461	13407845	295	annot_exons
novel_circ_001312	Bra017483	A09	+	13417193	13429354	10850	exon_intron
novel_circ_001313	Bra017454	A09	-	13607076	13607278	203	one_exon
novel_circ_001314	Bra017454	A09	+	13607308	13607469	162	antisense
novel_circ_001315	Bra017415	A09	+	14030172	14030454	283	exon_intron
novel_circ_001316	Bra017415	A09	+	14030177	14030403	227	exon_intron
novel_circ_001317	Bra017400	A09	-	14130445	14130673	229	antisense
novel_circ_001318	Bra017400	A09	-	14130450	14130645	196	antisense
novel_circ_001319	Bra017389	A09	-	14266767	14266924	158	antisense
novel_circ_001320	Bra017350	A09	-	14657552	14657765	214	antisense
novel_circ_001321	Bra037896	A09	-	15877862	15878413	552	one_exon
novel_circ_001322	Bra029464	A09	+	17513043	17517010	3903	exon_intron
novel_circ_001323	Bra029545	A09	-	18170173	18170570	398	antisense
novel_circ_001324	Bra029545	A09	-	18170399	18170583	185	antisense
novel_circ_001325	Bra029545	A09	+	18170399	18170583	185	one_exon
novel_circ_001326	Bra029545	A09	+	18170863	18171071	209	one_exon
novel_circ_001327	NA	A09	+	18254356	18254781	426	intergenic
novel_circ_001328	Bra029555	A09	-	18257541	18277340	14756	exon_intron
novel_circ_001329	Bra029555	A09	-	18257541	18282288	19589	exon_intron
novel_circ_001330	NA	A09	+	18371189	18371416	228	intergenic
novel_circ_001331	Bra029570	A09	+	18371239	18371466	228	exon_intron
novel_circ_001332	NA	A09	-	18503854	18504126	273	intergenic
novel_circ_001333	Bra028058	A09	+	18962111	18962683	573	one_exon
novel_circ_001334	Bra028047	A09	+	19091960	19092247	288	one_exon
novel_circ_001335	Bra023284	A09	-	20001788	20002041	254	one_exon
novel_circ_001336	Bra023215	A09	-	20668621	20693321	23637	exon_intron
novel_circ_001337	Bra023215	A09	-	20668621	20697180	27496	exon_intron
novel_circ_001338	NA	A09	-	20729500	20741521	12022	intergenic
novel_circ_001339	NA	A09	+	22547599	22548433	835	intergenic
novel_circ_001340	Bra032906	A09	+	23087723	23088058	336	one_exon
novel_circ_001341	Bra032906	A09	-	23087841	23088169	329	antisense
novel_circ_001342	Bra032906	A09	-	23087905	23088513	609	antisense
novel_circ_001343	Bra032906	A09	-	23087914	23088162	249	antisense
novel_circ_001344	Bra032906	A09	+	23087918	23088226	309	one_exon
novel_circ_001345	Bra032906	A09	+	23087920	23088228	309	one_exon
novel_circ_001346	Bra032906	A09	-	23087920	23088228	309	antisense
novel_circ_001347	Bra032906	A09	+	23087923	23088114	192	one_exon
novel_circ_001348	Bra032906	A09	+	23087923	23088153	231	one_exon
novel_circ_001349	Bra032906	A09	+	23087923	23088192	270	one_exon
novel_circ_001350	Bra032906	A09	+	23087923	23088210	288	one_exon
novel_circ_001351	Bra032906	A09	+	23087934	23088239	306	one_exon
novel_circ_001352	Bra032906	A09	+	23087937	23088161	225	one_exon
novel_circ_001353	Bra032906	A09	+	23087937	23088200	264	one_exon
novel_circ_001354	Bra032906	A09	+	23087937	23088239	303	one_exon
novel_circ_001355	Bra032906	A09	-	23088005	23088232	228	antisense
novel_circ_001356	Bra032906	A09	+	23088012	23088200	189	one_exon
novel_circ_001357	Bra032906	A09	-	23088076	23088228	153	antisense
novel_circ_001358	Bra032893	A09	+	23186189	23186642	277	exon_intron
novel_circ_001359	Bra032889	A09	-	23260143	23260298	156	antisense
novel_circ_001360	Bra032889	A09	-	23260143	23260334	192	antisense
novel_circ_001361	NA	A09	-	23429618	23429832	215	intergenic
novel_circ_001362	Bra032847	A09	+	23600624	23601851	1228	antisense
novel_circ_001363	Bra032810	A09	+	23811729	23812019	291	antisense
novel_circ_001364	Bra032810	A09	-	23811814	23812149	336	one_exon
novel_circ_001365	Bra032800	A09	-	23872521	23875440	810	exon_intron
novel_circ_001366	Bra024759	A09	-	24189566	24189922	196	annot_exons
novel_circ_001367	Bra024640	A09	+	25091822	25092056	235	antisense
novel_circ_001368	Bra024634	A09	+	25124905	25125076	172	one_exon
novel_circ_001369	Bra024613	A09	+	25246118	25261435	15318	antisense
novel_circ_001370	Bra024611	A09	+	25295024	25295239	216	antisense
novel_circ_001371	NA	A09	-	25716242	25716514	273	intergenic
novel_circ_001372	NA	A09	-	25716255	25716541	287	intergenic
novel_circ_001373	Bra031382	A09	-	25992191	25992519	329	exon_intron
novel_circ_001374	Bra031374	A09	-	26037985	26038252	268	one_exon
novel_circ_001375	Bra036100	A09	-	26828696	26833687	4992	exon_intron
novel_circ_001376	Bra036100	A09	+	26828696	26833687	4992	antisense
novel_circ_001377	Bra036846	A09	+	26964895	26965074	180	one_exon
novel_circ_001378	Bra036846	A09	+	26964944	26965123	180	one_exon
novel_circ_001379	Bra036831	A09	-	27082171	27082761	525	exon_intron
novel_circ_001380	NA	A09	+	27164906	27165101	196	intergenic
novel_circ_001381	NA	A09	-	27241656	27244125	2470	intergenic
novel_circ_001382	Bra036795	A09	+	27290008	27290303	296	exon_intron
novel_circ_001383	Bra036791	A09	+	27305367	27306530	1164	antisense
novel_circ_001384	Bra006877	A09	-	27448432	27449023	592	one_exon
novel_circ_001385	Bra006907	A09	+	27592571	27612592	19877	exon_intron
novel_circ_001386	Bra006937	A09	+	27847051	27847270	220	one_exon
novel_circ_001387	Bra006998	A09	+	28258255	28258459	205	antisense
novel_circ_001388	Bra007007	A09	+	28290051	28302258	11430	exon_intron
novel_circ_001389	Bra007042	A09	+	28521908	28526621	4714	antisense
novel_circ_001390	Bra007077	A09	-	28690098	28694439	4342	intronic
novel_circ_001391	NA	A09	+	28713271	28713629	359	intergenic
novel_circ_001392	Bra007083	A09	+	28726787	28727033	247	antisense
novel_circ_001393	Bra007120	A09	-	28946386	28946730	153	annot_exons
novel_circ_001394	Bra007200	A09	-	29445904	29446086	183	one_exon
novel_circ_001395	Bra007205	A09	+	29496397	29496582	186	one_exon
novel_circ_001396	Bra007205	A09	-	29496397	29496582	186	antisense
novel_circ_001397	Bra007339	A09	-	30206067	30206259	193	one_exon
novel_circ_001398	Bra007389	A09	-	30479746	30488477	8390	exon_intron
novel_circ_001399	Bra007434	A09	-	30701785	30703164	1155	annot_exons
novel_circ_001400	Bra007440	A09	-	30739775	30741011	1237	antisense
novel_circ_001401	Bra007444	A09	+	30757046	30757470	425	exon_intron
novel_circ_001402	Bra007505	A09	+	31047670	31047882	213	exon_intron
novel_circ_001403	Bra007592	A09	+	31444717	31449001	3896	exon_intron
novel_circ_001404	Bra007608	A09	+	31518332	31518654	224	annot_exons
novel_circ_001405	Bra007656	A09	+	31807439	31807839	401	antisense
novel_circ_001406	Bra007699	A09	+	31970448	31974122	2604	exon_intron
novel_circ_001407	Bra007709	A09	-	32011813	32012028	216	exon_intron
novel_circ_001408	Bra007715	A09	+	32023959	32025829	1603	exon_intron
novel_circ_001409	Bra007715	A09	-	32023962	32025832	1871	antisense
novel_circ_001410	Bra007856	A09	-	32778668	32779141	314	exon_intron
novel_circ_001411	Bra039237	A09	+	32855594	32856067	347	exon_intron
novel_circ_001412	Bra039230	A09	+	32885887	32886109	223	one_exon
novel_circ_001413	Bra039939	A09	-	33220124	33220483	360	antisense
novel_circ_001414	Bra039923	A09	-	33377865	33378085	221	one_exon
novel_circ_001415	Bra038516	A09	-	33464878	33464987	110	antisense
novel_circ_001416	Bra038516	A09	+	33464878	33464987	110	one_exon
novel_circ_001417	Bra038516	A09	-	33464965	33465183	219	antisense
novel_circ_001418	Bra038518	A09	-	33477320	33477656	337	antisense
novel_circ_001419	Bra038521	A09	-	33490717	33490973	257	antisense
novel_circ_001420	Bra038538	A09	-	33605419	33605845	427	antisense
novel_circ_001421	NA	A09	-	33644366	33644583	218	intergenic
novel_circ_001422	Bra031225	A09	+	33666441	33666781	341	one_exon
novel_circ_001423	Bra031157	A09	+	34011378	34011673	296	antisense
novel_circ_001424	NA	A09	+	34073942	34074091	150	intergenic
novel_circ_001425	NA	A09	+	34155463	34155680	218	intergenic
novel_circ_001426	Bra031048	A09	-	34499660	34500154	495	one_exon
novel_circ_001427	Bra030992	A09	-	34807403	34807610	208	antisense
novel_circ_001428	NA	A09	+	35000146	35000686	541	intergenic
novel_circ_001429	NA	A09	-	35000149	35000689	541	intergenic
novel_circ_001430	Bra026811	A09	+	35574978	35575355	378	exon_intron
novel_circ_001431	Bra026813	A09	+	35579422	35579574	153	antisense
novel_circ_001432	Bra026860	A09	-	35757810	35758030	221	one_exon
novel_circ_001433	Bra026882	A09	+	35844414	35861876	17363	exon_intron
novel_circ_001434	Bra026992	A09	+	36420179	36420361	183	antisense
novel_circ_001435	Bra031771	A09	-	36565891	36566156	266	exon_intron
novel_circ_001436	Bra031756	A09	+	36650162	36653578	3417	antisense
novel_circ_001437	Bra031693	A09	-	36970900	36971113	214	one_exon
novel_circ_001438	Bra031693	A09	+	36972672	36973430	759	antisense
novel_circ_001439	Bra031621	A09	+	37301662	37301941	280	one_exon
novel_circ_001440	Bra031605	A09	-	37383695	37386986	3128	exon_intron
novel_circ_001441	Bra031605	A09	+	37383695	37386986	3292	antisense
novel_circ_001442	Bra031605	A09	+	37383915	37384091	177	antisense
novel_circ_001443	Bra031605	A09	-	37383915	37384091	177	one_exon
novel_circ_001444	Bra031596	A09	+	37417693	37417931	239	one_exon
novel_circ_001445	Bra031584	A09	-	37422293	37468429	44862	exon_intron
novel_circ_001446	Bra031559	A09	+	37590873	37591076	204	antisense
novel_circ_001447	Bra032450	A09	+	37898993	37899217	225	antisense
novel_circ_001448	Bra032556	A09	+	38348564	38348860	297	one_exon
novel_circ_001449	Bra015607	A10	+	198076	198786	497	annot_exons
novel_circ_001450	Bra015538	A10	-	702400	702624	225	antisense
novel_circ_001451	Bra015508	A10	-	854675	854872	198	one_exon
novel_circ_001452	Bra015417	A10	-	1423423	1423742	320	one_exon
novel_circ_001453	Bra015348	A10	-	1869720	1870349	630	antisense
novel_circ_001454	Bra015302	A10	-	2106102	2106780	679	antisense
novel_circ_001455	Bra015302	A10	-	2110833	2111089	257	antisense
novel_circ_001456	Bra015257	A10	+	2362023	2377544	15522	antisense
novel_circ_001457	NA	A10	+	2793957	2794239	283	intergenic
novel_circ_001458	Bra033335	A10	+	2824681	2825041	192	annot_exons
novel_circ_001459	Bra033331	A10	-	2855437	2855736	300	one_exon
novel_circ_001460	Bra033294	A10	-	3083360	3084628	1269	exon_intron
novel_circ_001461	NA	A10	+	3307328	3307768	441	intergenic
novel_circ_001462	Bra033225	A10	-	3438047	3438223	177	antisense
novel_circ_001463	Bra033225	A10	-	3438047	3438259	213	antisense
novel_circ_001464	Bra033225	A10	-	3438047	3438265	219	antisense
novel_circ_001465	NA	A10	+	3486235	3486632	398	intergenic
novel_circ_001466	NA	A10	+	3486238	3486635	398	intergenic
novel_circ_001467	NA	A10	+	3536878	3537053	176	intergenic
novel_circ_001468	NA	A10	-	3545188	3548683	3496	intergenic
novel_circ_001469	NA	A10	+	3545188	3548683	3496	intergenic
novel_circ_001470	Bra037935	A10	-	3857070	3857393	222	annot_exons
novel_circ_001471	Bra037933	A10	-	3873570	3873752	183	antisense
novel_circ_001472	Bra003102	A10	+	5224768	5225055	288	antisense
novel_circ_001473	Bra003091	A10	+	5329720	5330121	402	antisense
novel_circ_001474	Bra003044	A10	+	5842332	5842562	231	exon_intron
novel_circ_001475	Bra003044	A10	+	5842336	5842566	231	exon_intron
novel_circ_001476	Bra003044	A10	-	5842340	5842564	225	antisense
novel_circ_001477	Bra003044	A10	-	5842369	5843008	640	antisense
novel_circ_001478	Bra002914	A10	-	6842756	6842970	215	one_exon
novel_circ_001479	Bra002861	A10	+	7140863	7141738	876	one_exon
novel_circ_001480	Bra002821	A10	-	7420871	7421548	399	annot_exons
novel_circ_001481	NA	A10	-	7593729	7593958	230	intergenic
novel_circ_001482	Bra002778	A10	+	7701592	7702163	351	exon_intron
novel_circ_001483	Bra002764	A10	-	7806909	7807151	243	antisense
novel_circ_001484	Bra002764	A10	-	7806909	7807154	246	antisense
novel_circ_001485	Bra002764	A10	-	7806909	7807157	249	antisense
novel_circ_001486	Bra002764	A10	-	7807242	7807563	322	antisense
novel_circ_001487	Bra002764	A10	-	7807245	7807563	319	antisense
novel_circ_001488	Bra002764	A10	+	7807249	7807567	319	one_exon
novel_circ_001489	Bra002755	A10	-	7907720	7909619	972	annot_exons
novel_circ_001490	Bra002710	A10	+	8134050	8134405	250	annot_exons
novel_circ_001491	Bra002677	A10	+	8354490	8354641	152	one_exon
novel_circ_001492	Bra002677	A10	+	8357383	8357737	355	one_exon
novel_circ_001493	Bra002677	A10	-	8358203	8358602	400	antisense
novel_circ_001494	Bra002668	A10	-	8392339	8392887	549	antisense
novel_circ_001495	Bra002668	A10	-	8392726	8392995	270	antisense
novel_circ_001496	Bra002668	A10	-	8392960	8393142	183	antisense
novel_circ_001497	Bra002668	A10	-	8392966	8393190	225	antisense
novel_circ_001498	Bra002608	A10	-	8642231	8642860	630	one_exon
novel_circ_001499	Bra002567	A10	-	8899378	8903273	3896	antisense
novel_circ_001500	Bra002566	A10	-	8913350	8913546	197	antisense
novel_circ_001501	Bra002497	A10	+	9282643	9282874	232	one_exon
novel_circ_001502	Bra002497	A10	-	9282644	9282868	225	antisense
novel_circ_001503	Bra002497	A10	-	9282684	9282968	285	antisense
novel_circ_001504	Bra002497	A10	+	9282690	9282974	285	one_exon
novel_circ_001505	Bra002495	A10	-	9283248	9318961	35714	antisense
novel_circ_001506	Bra002437	A10	-	9656442	9662891	6450	antisense
novel_circ_001507	Bra002437	A10	+	9656442	9662891	6450	exon_intron
novel_circ_001508	Bra002400	A10	-	9900401	9900706	306	antisense
novel_circ_001509	Bra002388	A10	-	9956279	9956600	322	antisense
novel_circ_001510	Bra002362	A10	+	10123996	10124172	177	one_exon
novel_circ_001511	Bra002354	A10	+	10192523	10192732	210	antisense
novel_circ_001512	Bra002286	A10	-	10555100	10555551	452	one_exon
novel_circ_001513	NA	A10	+	10692551	10693119	569	intergenic
novel_circ_001514	NA	A10	-	10692582	10692824	243	intergenic
novel_circ_001515	Bra002253	A10	+	10714990	10715200	211	antisense
novel_circ_001516	Bra002248	A10	+	10743700	10744101	402	exon_intron
novel_circ_001517	Bra002211	A10	-	10929733	10930485	753	antisense
novel_circ_001518	Bra002115	A10	-	11436552	11436894	343	one_exon
novel_circ_001519	Bra008583	A10	+	11723647	11723815	169	antisense
novel_circ_001520	Bra008583	A10	+	11723657	11723921	265	antisense
novel_circ_001521	Bra008583	A10	+	11723962	11724507	546	antisense
novel_circ_001522	Bra008583	A10	-	11727051	11727547	497	one_exon
novel_circ_001523	Bra008595	A10	+	11772583	11773853	939	annot_exons
novel_circ_001524	NA	A10	+	11779490	11785752	6263	intergenic
novel_circ_001525	Bra008600	A10	-	11804949	11805129	181	one_exon
novel_circ_001526	Bra008633	A10	-	11979308	11979529	222	antisense
novel_circ_001527	Bra008667	A10	-	12108585	12109053	469	antisense
novel_circ_001528	Bra008667	A10	+	12108630	12109020	391	exon_intron
novel_circ_001529	Bra008695	A10	-	12236688	12237258	571	antisense
novel_circ_001530	NA	A10	+	12508113	12508575	463	intergenic
novel_circ_001531	NA	A10	+	12819282	12819571	290	intergenic
novel_circ_001532	Bra008831	A10	+	12830597	12830934	250	annot_exons
novel_circ_001533	Bra008831	A10	+	12830775	12831128	354	exon_intron
novel_circ_001534	Bra008834	A10	+	12840653	12841010	249	annot_exons
novel_circ_001535	Bra008911	A10	-	13184820	13186123	1304	antisense
novel_circ_001536	Bra008953	A10	+	13384614	13384996	309	annot_exons
novel_circ_001537	Bra008998	A10	+	13586539	13586955	417	one_exon
novel_circ_001538	Bra009023	A10	+	13698775	13706220	6769	exon_intron
novel_circ_001539	Bra009025	A10	+	13716136	13716393	258	one_exon
novel_circ_001540	Bra009034	A10	+	13769712	13773063	2507	exon_intron
novel_circ_001541	Bra009078	A10	+	13960177	13960458	200	exon_intron
novel_circ_001542	Bra009388	A10	+	14040907	14041233	327	one_exon
novel_circ_001543	Bra009388	A10	+	14040907	14041365	393	annot_exons
novel_circ_001544	Bra009388	A10	+	14040907	14041497	525	annot_exons
novel_circ_001545	Bra009388	A10	-	14041025	14041534	510	antisense
novel_circ_001546	Bra009388	A10	+	14041111	14041473	297	annot_exons
novel_circ_001547	Bra009330	A10	-	14274487	14274895	409	antisense
novel_circ_001548	Bra009329	A10	+	14278325	14278436	112	antisense
novel_circ_001549	Bra009306	A10	-	14404423	14404647	225	antisense
novel_circ_001550	Bra009306	A10	-	14404549	14404749	201	antisense
novel_circ_001551	Bra009306	A10	-	14404687	14404908	222	antisense
novel_circ_001552	Bra009298	A10	-	14441138	14441459	322	one_exon
novel_circ_001553	Bra009294	A10	-	14451140	14451631	492	exon_intron
novel_circ_001554	Bra009294	A10	-	14451449	14451640	192	one_exon
novel_circ_001555	Bra009237	A10	+	14709109	14711540	2432	antisense
novel_circ_001556	Bra009221	A10	-	14770810	14771282	473	antisense
novel_circ_001557	Bra009215	A10	-	14795573	14795734	162	one_exon
novel_circ_001558	Bra009184	A10	-	14912055	14912271	217	antisense
novel_circ_001559	Bra009184	A10	+	14912055	14912271	217	exon_intron
novel_circ_001560	Bra009184	A10	-	14912065	14912333	269	antisense
novel_circ_001561	Bra009149	A10	-	15050081	15050294	214	one_exon
novel_circ_001562	Bra009149	A10	-	15050105	15050512	408	one_exon
novel_circ_001563	Bra009130	A10	+	15125241	15125916	605	annot_exons
novel_circ_001564	NA	A10	+	15254393	15254625	233	intergenic
novel_circ_001565	Bra009090	A10	-	15265719	15265984	266	one_exon
novel_circ_001566	Bra009416	A10	-	15349799	15353469	3596	exon_intron
novel_circ_001567	Bra009416	A10	-	15349799	15354108	4163	exon_intron
novel_circ_001568	Bra009416	A10	-	15353196	15353834	567	annot_exons
novel_circ_001569	Bra009434	A10	+	15437234	15437684	451	antisense
novel_circ_001570	Bra009434	A10	-	15437333	15437701	369	one_exon
novel_circ_001571	Bra009460	A10	-	15549110	15553699	4310	exon_intron
novel_circ_001572	Bra009480	A10	+	15671661	15671834	174	antisense
novel_circ_001573	Bra009561	A10	+	16039749	16039938	190	antisense
novel_circ_001574	NA	pseudoChr	-	100778	101792	1015	intergenic
novel_circ_001575	NA	pseudoChr	-	707832	715645	7814	intergenic
novel_circ_001576	NA	pseudoChr	+	708679	716112	7434	intergenic
novel_circ_001577	NA	pseudoChr	-	708679	716112	7434	intergenic
novel_circ_001578	NA	pseudoChr	+	797865	798613	749	intergenic
novel_circ_001579	Bra034972	pseudoChr	+	1383761	1384251	401	exon_intron
novel_circ_001580	Bra034989	pseudoChr	+	1622257	1622482	226	antisense
novel_circ_001581	Bra035007	pseudoChr	+	1782133	1782583	359	exon_intron
novel_circ_001582	Bra035007	pseudoChr	-	1782993	1783314	322	antisense
novel_circ_001583	Bra035388	pseudoChr	+	3166689	3166927	239	one_exon
novel_circ_001584	NA	pseudoChr	+	3171344	3171639	296	intergenic
novel_circ_001585	NA	pseudoChr	-	3171344	3171639	296	intergenic
novel_circ_001586	NA	pseudoChr	+	3445431	3449499	4069	intergenic
novel_circ_001587	Bra035985	pseudoChr	-	3697655	3698194	373	annot_exons
novel_circ_001588	NA	pseudoChr	+	4372626	4376331	3706	intergenic
novel_circ_001589	NA	pseudoChr	-	4372626	4376331	3706	intergenic
novel_circ_001590	Bra038174	pseudoChr	+	5028316	5028536	221	exon_intron
novel_circ_001591	Bra039385	pseudoChr	+	7207719	7207967	249	one_exon
novel_circ_001592	Bra039529	pseudoChr	+	7550607	7551089	392	exon_intron
novel_circ_001593	Bra039579	pseudoChr	-	7786552	7786760	209	one_exon
novel_circ_001594	NA	pseudoChr	+	7954281	7957272	2992	intergenic
novel_circ_001595	NA	pseudoChr	+	7954281	7958512	4232	intergenic
novel_circ_001596	NA	pseudoChr	-	7957076	7958315	1240	intergenic
novel_circ_001597	NA	pseudoChr	+	7958202	7958553	352	intergenic
novel_circ_001598	NA	pseudoChr	+	7958279	7958630	352	intergenic
novel_circ_001599	NA	pseudoChr	-	8400328	8401744	1417	intergenic
novel_circ_001600	NA	pseudoChr	+	8400363	8401779	1417	intergenic
novel_circ_001601	NA	pseudoChr	+	8870514	8872282	1769	intergenic
novel_circ_001602	Bra040003	pseudoChr	-	9001441	9001982	542	one_exon
novel_circ_001603	Bra040186	pseudoChr	+	9145091	9145503	413	antisense
novel_circ_001604	Bra040201	pseudoChr	+	9216051	9216207	157	one_exon
novel_circ_001605	Bra040261	pseudoChr	-	9398855	9399145	291	one_exon
novel_circ_001606	Bra040262	pseudoChr	+	9405097	9405555	381	annot_exons
novel_circ_001607	NA	pseudoChr	-	9655701	9658310	2610	intergenic
novel_circ_001608	NA	pseudoChr	+	10237801	10239703	1903	intergenic
novel_circ_001609	NA	pseudoChr	+	10628773	10629421	649	intergenic
novel_circ_001610	Bra040643	pseudoChr	+	11638672	11638857	186	one_exon
novel_circ_001611	NA	pseudoChr	+	11767420	11767748	329	intergenic
novel_circ_001612	Bra040683	pseudoChr	+	11807312	11811940	3363	exon_intron
novel_circ_001613	Bra040730	pseudoChr	-	12237985	12241623	3639	exon_intron
novel_circ_001614	Bra040759	pseudoChr	+	12733761	12752778	13525	exon_intron
novel_circ_001615	Bra040759	pseudoChr	+	12733761	12759710	20457	exon_intron
novel_circ_001616	Bra040763	pseudoChr	+	12775350	12778575	3158	exon_intron
novel_circ_001617	Bra040763	pseudoChr	-	12775350	12778575	3226	antisense
novel_circ_001618	NA	pseudoChr	-	12777961	12798391	20431	intergenic
novel_circ_001619	Bra040782	pseudoChr	-	13044548	13044881	334	exon_intron
novel_circ_001620	NA	pseudoChr	+	13067262	13067472	211	intergenic
novel_circ_001621	NA	pseudoChr	+	13273542	13273761	220	intergenic
novel_circ_001622	NA	pseudoChr	+	14110564	14110791	228	intergenic
novel_circ_001623	Bra040870	pseudoChr	-	14239673	14239938	266	one_exon
novel_circ_001624	NA	pseudoChr	+	14452110	14452571	462	intergenic
novel_circ_001625	Bra040906	pseudoChr	-	14690940	14691126	187	exon_intron
novel_circ_001626	NA	pseudoChr	-	15124514	15126279	1766	intergenic
novel_circ_001627	NA	pseudoChr	+	15124514	15126279	1766	intergenic
novel_circ_001628	NA	pseudoChr	+	16693192	16700694	7503	intergenic
novel_circ_001629	NA	pseudoChr	-	17365445	17371718	6274	intergenic
novel_circ_001630	NA	pseudoChr	+	18023931	18024106	176	intergenic
novel_circ_001631	NA	pseudoChr	-	18180423	18180795	373	intergenic
novel_circ_001632	Bra041104	pseudoChr	-	18374952	18378019	3068	antisense
novel_circ_001633	NA	pseudoChr	-	18453155	18454994	1840	intergenic
novel_circ_001634	NA	pseudoChr	-	18637241	18640403	3163	intergenic
novel_circ_001635	NA	pseudoChr	+	19635377	19721333	85957	intergenic
novel_circ_001636	NA	pseudoChr	-	20328086	20384602	56517	intergenic

## Sheet: Table S3
Table S3. Putative miRNA-binding sites of circRNAs.
miRNA	target	target_start	target_end	energy(kcal/mol)	MFE ratio	target_region(3'->5')	mirna-target_pairing(5'->3')	miRNA_sequence(5'->3')	source_gene	chr	strand	genomic_start	genomic_end	spliced_length	annot_type
miR5021-x	novel_circ_000002	285	302	-20.3	0.6591	AUCUGCUGCUUCUUCUGC	x|||x|||||||||||xx	GAGAAGACGAAGAAGAAC	Bra011828	A01	-	346055	346493	439	antisense
miR2275-x	novel_circ_000027	6490	6507	-22.5	0.8007	ACGUCUCCUUUUCUUUGU	xx|o|||||||||||||x	AUCGGAGGAAAAGAAACU	Bra011217	A01	-	3259061	3301106	41491	exon_intron
miR2275-x	novel_circ_000027	38652	38669	-22.5	0.8065	CGGCCUCCUUUUCUUUAU	xo||||||||||||||xx	AUCGGAGGAAAAGAAACU	Bra011217	A01	-	3259061	3301106	41491	exon_intron
miR479-y	novel_circ_000027	15893	15912	-24.9	0.6975	UUUCGGCUUGGUUAUUUUGA	xo|||||||||||||xx|||	UGAGCCGAACCAAUAUCACU	Bra011217	A01	-	3259061	3301106	41491	exon_intron
miR5021-x	novel_circ_000027	23950	23967	-21.4	0.6948	CUCUUCUGUUUCUUAUUU	||||||||o|||||x||x	GAGAAGACGAAGAAGAAC	Bra011217	A01	-	3259061	3301106	41491	exon_intron
miR5149-y	novel_circ_000027	26339	26356	-20.3	0.6591	CUCGCCGCUUCUAUAUCU	||||x|o||||||x|||o	GAGCUGUGAAGAUUUAGG	Bra011217	A01	-	3259061	3301106	41491	exon_intron
miR845-x	novel_circ_000027	9742	9763	-29.6	0.7494	UCGAGACUAUGGUCAACAAUCC	x||||||||||||x|||||o|x	UGCUCUGAUACCAAUUGUUGGC	Bra011217	A01	-	3259061	3301106	41491	exon_intron
miR8594-x	novel_circ_000027	29890	29907	-16.9	0.6145	UACCAAUACUCUUCAAAU	||||x|||||||||xxx|	AUGGAUAUGAGAAGCAAA	Bra011217	A01	-	3259061	3301106	41491	exon_intron
novel-m0727-5p	novel_circ_000027	31629	31649	-21.1	0.6081	AAAUGUCUCAGUUCAACUCAA	|||||||||||x|xx|||||x	UUUACAGAGUCUACAUGAGUC	Bra011217	A01	-	3259061	3301106	41491	exon_intron
bra-miR156a-3p	novel_circ_000028	24594	24614	-28.5	0.6802	CGCAGGAGAGAGAGACGGUCG	||x|x|||||||||||o||x|	GCUUACUCUCUCUCUGUCACC	Bra011212	A01	+	3261519	3303955	42437	exon_intron
miR1134-y	novel_circ_000028	41808	41826	-20	0.6623	UUUGUGUUUUUUUUUUUCU	||o|||||o||o||o||||	AAGCACAAGAAGAAGAAGA	Bra011212	A01	+	3261519	3303955	42437	exon_intron
miR2275-x	novel_circ_000028	24150	24167	-22.2	0.7957	AAGUUUCCUUUUCUUUGC	x||oo||||||||||||x	AUCGGAGGAAAAGAAACU	Bra011212	A01	+	3261519	3303955	42437	exon_intron
miR2275-x	novel_circ_000028	33303	33320	-22.5	0.8007	ACGUCUCCUUUUCUUUGU	xx|o|||||||||||||x	AUCGGAGGAAAAGAAACU	Bra011212	A01	+	3261519	3303955	42437	exon_intron
novel-m0713-5p	novel_circ_000028	7344	7366	-39.8	0.995	UAGGUACACUUGCUGCUUUCUGC	||||||||||||||||||||||x	AUCCAUGUGAACGACGAAAGACA	Bra011212	A01	+	3261519	3303955	42437	exon_intron
bra-miR156a-3p	novel_circ_000029	23428	23448	-28.5	0.6802	CGCAGGAGAGAGAGACGGUCG	||x|x|||||||||||o||x|	GCUUACUCUCUCUCUGUCACC	Bra011212	A01	+	3262685	3305059	42375	exon_intron
miR1134-y	novel_circ_000029	40642	40660	-20	0.6623	UUUGUGUUUUUUUUUUUCU	||o|||||o||o||o||||	AAGCACAAGAAGAAGAAGA	Bra011212	A01	+	3262685	3305059	42375	exon_intron
miR2275-x	novel_circ_000029	22984	23001	-22.2	0.7957	AAGUUUCCUUUUCUUUGC	x||oo||||||||||||x	AUCGGAGGAAAAGAAACU	Bra011212	A01	+	3262685	3305059	42375	exon_intron
miR2275-x	novel_circ_000029	32137	32154	-22.5	0.8007	ACGUCUCCUUUUCUUUGU	xx|o|||||||||||||x	AUCGGAGGAAAAGAAACU	Bra011212	A01	+	3262685	3305059	42375	exon_intron
novel-m0713-5p	novel_circ_000029	6178	6200	-39.8	0.995	UAGGUACACUUGCUGCUUUCUGC	||||||||||||||||||||||x	AUCCAUGUGAACGACGAAAGACA	Bra011212	A01	+	3262685	3305059	42375	exon_intron
miR2275-x	novel_circ_000030	736	753	-22.5	0.8065	CGGCCUCCUUUUCUUUAU	xo||||||||||||||xx	AUCGGAGGAAAAGAAACU	Bra011217	A01	-	3262685	3305059	41820	exon_intron
miR2275-x	novel_circ_000030	10443	10460	-22.5	0.8007	ACGUCUCCUUUUCUUUGU	xx|o|||||||||||||x	AUCGGAGGAAAAGAAACU	Bra011217	A01	-	3262685	3305059	41820	exon_intron
miR479-y	novel_circ_000030	19846	19865	-24.9	0.6975	UUUCGGCUUGGUUAUUUUGA	xo|||||||||||||xx|||	UGAGCCGAACCAAUAUCACU	Bra011217	A01	-	3262685	3305059	41820	exon_intron
miR5021-x	novel_circ_000030	27903	27920	-21.4	0.6948	CUCUUCUGUUUCUUAUUU	||||||||o|||||x||x	GAGAAGACGAAGAAGAAC	Bra011217	A01	-	3262685	3305059	41820	exon_intron
miR5149-y	novel_circ_000030	30292	30309	-20.3	0.6591	CUCGCCGCUUCUAUAUCU	||||x|o||||||x|||o	GAGCUGUGAAGAUUUAGG	Bra011217	A01	-	3262685	3305059	41820	exon_intron
miR845-x	novel_circ_000030	13695	13716	-29.6	0.7494	UCGAGACUAUGGUCAACAAUCC	x||||||||||||x|||||o|x	UGCUCUGAUACCAAUUGUUGGC	Bra011217	A01	-	3262685	3305059	41820	exon_intron
miR8594-x	novel_circ_000030	33843	33860	-16.9	0.6145	UACCAAUACUCUUCAAAU	||||x|||||||||xxx|	AUGGAUAUGAGAAGCAAA	Bra011217	A01	-	3262685	3305059	41820	exon_intron
novel-m0727-5p	novel_circ_000030	35582	35602	-21.1	0.6081	AAAUGUCUCAGUUCAACUCAA	|||||||||||x|xx|||||x	UUUACAGAGUCUACAUGAGUC	Bra011217	A01	-	3262685	3305059	41820	exon_intron
miR824-x	novel_circ_000044	4256	4274	-18.1	0.6441	AACUAGUAAACACUCUUUU	|x||x||||||||||||xx	UAGACCAUUUGUGAGAAUU	Bra011062	A01	+	4143306	4161424	18119	antisense
novel-m0521-3p	novel_circ_000045	2773	2792	-40.2	0.841	GUCUCCUCCUCCCCUCACAC	||||||||||||||||x|xx	CAGAGGAGGAGGGGAGGGGA	Bra011039	A01	-	4287935	4292401	4467	exon_intron
miR2275-x	novel_circ_000126	3884	3901	-17.6	0.6308	UCCUCUCCUUUUCUAUGA	|xxo||||||||||x|||	AUCGGAGGAAAAGAAACU	Bra013681	A01	+	7094746	7111412	9491	exon_intron
miR2275-x	novel_circ_000127	3884	3901	-17.6	0.6308	UCCUCUCCUUUUCUAUGA	|xxo||||||||||x|||	AUCGGAGGAAAAGAAACU	Bra013681	A01	+	7094746	7128789	26868	exon_intron
novel-m0317-5p	novel_circ_000127	26567	26586	-18.4	0.6323	ACCGGUUGUUAUUUUAAAAU	|||||||oo||x||||||x|	UGGCCAAUGAUUAAAUUUGA	Bra013681	A01	+	7094746	7128789	26868	exon_intron
miR1134-y	novel_circ_000132	540	558	-22.6	0.7635	UUCUUCUUCUUCUGCUUCU	|||x|x|||||||x|||||	AAGCACAAGAAGAAGAAGA	Bra013717	A01	-	7372461	7373162	702	antisense
miR5021-x	novel_circ_000132	535	552	-23.4	0.7748	UUCUUCUGCUUCUUCGGC	o||||||||||||||xxx	GAGAAGACGAAGAAGAAC	Bra013717	A01	-	7372461	7373162	702	antisense
miR5021-x	novel_circ_000141	6794	6811	-21.1	0.7057	UUCUUCUGUUUCUUCAUG	o|||||||o||||||x||	GAGAAGACGAAGAAGAAC	Bra026257	A01	+	10135105	10144611	8858	exon_intron
miR5021-x	novel_circ_000141	8637	8654	-19.4	0.6488	UUCUUCUGCUUCUGACUG	o||||||||||||xxx||	GAGAAGACGAAGAAGAAC	Bra026257	A01	+	10135105	10144611	8858	exon_intron
miR845-x	novel_circ_000152	257	278	-29.8	0.7506	ACGAGACUAUGGUUAACACUUU	||||||||||||||||||xoox	UGCUCUGAUACCAAUUGUUGGC	Bra037608	A01	-	12650779	12655791	1353	exon_intron
novel-m0135-3p	novel_circ_000158	65	85	-19.5	0.6331	AUCCUAUAUCCCAAACCCAAA	||x|||x||||||||x||x||	UAUGAUUUAGGGUUUAGGAUU	NA	A01	+	13617774	13617976	203	intergenic
novel-m0161-3p	novel_circ_000158	71	91	-24.2	0.7446	GUCCAAAUCCUAUAUCCCAAA	xox|||||||||x||||||||	AGAGUUUAGGAUUUAGGGUUU	NA	A01	+	13617774	13617976	203	intergenic
novel-m0225-3p	novel_circ_000158	71	91	-24.2	0.7446	GUCCAAAUCCUAUAUCCCAAA	xox|||||||||x||||||||	AGAGUUUAGGAUUUAGGGUUU	NA	A01	+	13617774	13617976	203	intergenic
novel-m0392-3p	novel_circ_000158	71	91	-24.2	0.7446	GUCCAAAUCCUAUAUCCCAAA	xox|||||||||x||||||||	AGAGUUUAGGAUUUAGGGUUU	NA	A01	+	13617774	13617976	203	intergenic
novel-m0399-3p	novel_circ_000158	95	115	-22.9	0.696	CAAAACCCAAAUCCCGGAUCU	x|||x||||||||||xo||||	AUUUAGGGUUUAGGGAUUAGA	NA	A01	+	13617774	13617976	203	intergenic
novel-m0611-5p	novel_circ_000158	71	91	-24.2	0.7446	GUCCAAAUCCUAUAUCCCAAA	xox|||||||||x||||||||	AGAGUUUAGGAUUUAGGGUUU	NA	A01	+	13617774	13617976	203	intergenic
novel-m0812-3p	novel_circ_000158	95	115	-22.9	0.696	CAAAACCCAAAUCCCGGAUCU	x|||x||||||||||xo||||	AUUUAGGGUUUAGGGAUUAGA	NA	A01	+	13617774	13617976	203	intergenic
miR5021-x	novel_circ_000174	2201	2218	-22.2	0.7425	UUCUUCUGCUUCUUUUGU	o|||||||||||||o|xx	GAGAAGACGAAGAAGAAC	Bra023734	A01	-	18617217	18621946	4641	exon_intron
miR5293-x	novel_circ_000185	28229	28248	-23.3	0.6601	UUCUUCUCGUUCCUUAUUUU	||||||o||||||||x||o|	AAGAAGGGCAAGGAAGAAGA	Bra021321	A01	+	21393841	21426554	32629	exon_intron
novel-m0108-3p	novel_circ_000185	15537	15558	-25.9	0.6364	ACGUAAGCCUUCAUCUUCGUUA	||||x||x||||||||||||x|	UGCACUCAGAAGUAGAAGCACU	Bra021321	A01	+	21393841	21426554	32629	exon_intron
novel-m0510-3p	novel_circ_000185	17765	17786	-24.5	0.7585	UAUAUUAAUCUACCUGGUUGUA	|||||x||||||||||o|||x|	AUAUAUUUAGAUGGACUAACCU	Bra021321	A01	+	21393841	21426554	32629	exon_intron
miR5293-x	novel_circ_000186	18892	18911	-23.6	0.6686	UUCUUCUCGUUCCUUAUCCU	||||||o||||||||x|x||	AAGAAGGGCAAGGAAGAAGA	Bra021320	A01	-	21393841	21426554	28627	exon_intron
novel-m0108-3p	novel_circ_000186	16344	16365	-26.5	0.6527	AUGUGAGUCUUGACCUUCGCGA	|o|||||||||x|x|||||x||	UGCACUCAGAAGUAGAAGCACU	Bra021320	A01	-	21393841	21426554	28627	exon_intron
novel-m0580-5p	novel_circ_000197	417	437	-22.6	0.7314	UCUCUAGGAAUCGAUAUUGAA	|||||||||||||x|||xx|x	AGAGAUCCUUAGCAAUAUAUA	Bra021526	A01	-	23916055	23917007	615	annot_exons
miR5021-x	novel_circ_000206	1623	1640	-22.5	0.7426	CUCUUCUUCUUCUUCUUC	|||||||x|||||||||x	GAGAAGACGAAGAAGAAC	Bra040057	A01	+	25284156	25287213	2820	exon_intron
novel-m0732-3p	novel_circ_000206	240	260	-19.6	0.6068	AAACUAGAACACAAGAGAAGU	||||||||||||||x|xx|x|	UUUGAUCUUGUGUUGUGAUGA	Bra040057	A01	+	25284156	25287213	2820	exon_intron
novel-m0833-3p	novel_circ_000214	70	91	-25.7	0.6853	AUGGGAACCGGCAUAGGAACUA	||ox||||x||||||||||||x	UAUACUUGUCCGUAUCCUUGAC	Bra028836	A02	-	440834	441100	267	exon_intron
miR3699-y	novel_circ_000226	1992	2009	-16.6	0.6171	AAUCCUCUUCUUUCUCAC	||oxx||||||||||||x	UUGACAGAAGAAAGAGUU	Bra023397	A02	+	2165783	2172494	6712	antisense
novel-m0036-3p	novel_circ_000226	4244	4264	-24.6	0.6276	ACGCUAUAACUCAACCCAGAC	||x|||||x|||||||||ox|	UGAGAUAUGGAGUUGGGUUGG	Bra023397	A02	+	2165783	2172494	6712	antisense
miR5721-x	novel_circ_000242	3944	3964	-25.9	0.7115	CUUUUACUUCACCCUUUCUUU	|||||||o|||||||||xoo|	GAAAAUGGAGUGGGAAAUGGA	Bra020253	A02	-	4846204	4852977	6687	exon_intron
miR2275-x	novel_circ_000243	121	138	-19.8	0.6923	UAGUCUUCUUUUCUUUUU	|||o||o|||||||||xx	AUCGGAGGAAAAGAAACU	Bra020284	A02	+	4988001	4994368	6368	antisense
miR2936-x	novel_circ_000244	69761	69781	-26.6	0.665	UGCUUUCUCUCCUGUCUCUAC	x|||o||||||x|||||||x|	UCGAGAGAGAGAACAGAGACG	Bra020331	A02	+	5154654	5232063	76748	exon_intron
miR5185-y	novel_circ_000244	70125	70142	-25.8	0.7207	CCUCCAACCGACUCUCUC	|||||||||||x|||xox	GGAGGUUGGCUUAGAAGC	Bra020331	A02	+	5154654	5232063	76748	exon_intron
miR5293-x	novel_circ_000244	72675	72694	-25.4	0.7216	UUCUUGCCGUUUCUUCUUUC	|||||x|||||o||||||ox	AAGAAGGGCAAGGAAGAAGA	Bra020331	A02	+	5154654	5232063	76748	exon_intron
novel-m0036-3p	novel_circ_000244	24696	24716	-36.5	0.9432	AUUCUAUACCUCAACCCAACC	|o|||||||||||||||||||	UGAGAUAUGGAGUUGGGUUGG	Bra020331	A02	+	5154654	5232063	76748	exon_intron
novel-m0059-3p	novel_circ_000244	38458	38480	-24.2	0.6914	AUCUCUUGGACUUACUUUUACAU	|x|||||||||||||o|x||x||	UUGAGAACCUGAAUGGAUAUUUA	Bra020331	A02	+	5154654	5232063	76748	exon_intron
novel-m0182-5p	novel_circ_000244	34252	34272	-24.3	0.7105	AACCAACUAAACACCAAUCCA	||||||x|x||||||||||||	UUGGUUCAAUUGUGGUUAGGU	Bra020331	A02	+	5154654	5232063	76748	exon_intron
novel-m0854-3p	novel_circ_000244	60915	60935	-17.1	0.6241	CUUUUAUUUCUUGACUAUUUU	||||||o|o||||xx||||||	GAAAAUGAGGAACAAAUAAAA	Bra020331	A02	+	5154654	5232063	76748	exon_intron
novel-m0856-3p	novel_circ_000244	38458	38480	-24.2	0.6914	AUCUCUUGGACUUACUUUUACAU	|x|||||||||||||o|x||x||	UUGAGAACCUGAAUGGAUAUUUA	Bra020331	A02	+	5154654	5232063	76748	exon_intron
novel-m0912-3p	novel_circ_000244	38458	38480	-24.2	0.6914	AUCUCUUGGACUUACUUUUACAU	|x|||||||||||||o|x||x||	UUGAGAACCUGAAUGGAUAUUUA	Bra020331	A02	+	5154654	5232063	76748	exon_intron
novel-m0220-3p	novel_circ_000273	1971	1991	-24	0.6366	AGAAAGGUCGUGGAGAACUUG	|o|||||||||||x|xx||||	UUUUUCCAGCACCACCAGAAC	Bra034020	A02	-	9144127	9150027	5125	annot_exons
miR2275-x	novel_circ_000280	515	532	-18.7	0.6538	GAUCCUCCUUUUCGUUGU	x|x||||||||||x|||x	AUCGGAGGAAAAGAAACU	NA	A02	+	11812687	11814766	2080	intergenic
miR5021-x	novel_circ_000294	2991	3008	-22.5	0.7475	UUCUUCUUCUUCUUCUCC	o||||||x||||||||xx	GAGAAGACGAAGAAGAAC	Bra008327	A02	+	13738783	13742661	3879	antisense
miR5021-x	novel_circ_000299	27	44	-20.8	0.6957	CUCUUCUGCUUCGCUCUG	||||||||||||xxox||	GAGAAGACGAAGAAGAAC	NA	A02	+	15589798	15592043	2246	intergenic
miR824-x	novel_circ_000300	2244	2262	-17.5	0.614	AACUGAUAAACACUCUCGA	|x|||x||||||||||xo|	UAGACCAUUUGUGAGAAUU	Bra033135	A02	-	16489483	16492693	3211	antisense
novel-m0854-3p	novel_circ_000300	817	837	-18	0.6667	UUUGUUCUCCUUGUUUAUCUU	o||x|x||||||||||||x||	GAAAAUGAGGAACAAAUAAAA	Bra033135	A02	-	16489483	16492693	3211	antisense
miR5153-y	novel_circ_000306	67	85	-25.3	0.697	CGUCUAAGGUGAGGGAGCA	||o|||||||||xx|x|||	GCGGAUUCCACUAACACGU	Bra022022	A02	+	18290119	18290338	220	antisense
novel-m0316-3p	novel_circ_000319	4501	4521	-28.1	0.6854	UCGUCUCUUUGUGUCUCCCCG	||||||||o|||x||||xx||	AGCAGAGAGACAGAGAGAAGC	Bra033102	A02	-	22685817	22692525	4835	exon_intron
miR5021-x	novel_circ_000323	1503	1520	-22.5	0.745	UUCUUCUUCUUCUUCUUC	o||||||x|||||||||x	GAGAAGACGAAGAAGAAC	Bra020469	A02	+	24645864	24648791	2342	exon_intron
novel-m0062-5p	novel_circ_000324	6833	6853	-21.7	0.7068	AUUUGAGAACUUAUUUAGUAU	|o|||x|||||||||||||||	UGAACCCUUGAAUAAAUCAUA	Bra029356	A02	+	25103670	25115749	12080	antisense
novel-m0071-5p	novel_circ_000324	6833	6853	-21.7	0.7068	AUUUGAGAACUUAUUUAGUAU	|o|||x|||||||||||||||	UGAACCCUUGAAUAAAUCAUA	Bra029356	A02	+	25103670	25115749	12080	antisense
novel-m0350-5p	novel_circ_000324	6192	6212	-30	0.9288	ACUUGGGUUCUUAUUGAGAUU	||||||||||||||||||xxx	UGAACCCAAGAAUAACUCAUU	Bra029356	A02	+	25103670	25115749	12080	antisense
novel-m0362-5p	novel_circ_000324	6833	6853	-21.7	0.7068	AUUUGAGAACUUAUUUAGUAU	|o|||x|||||||||||||||	UGAACCCUUGAAUAAAUCAUA	Bra029356	A02	+	25103670	25115749	12080	antisense
novel-m0370-5p	novel_circ_000324	6833	6853	-21.7	0.7068	AUUUGAGAACUUAUUUAGUAU	|o|||x|||||||||||||||	UGAACCCUUGAAUAAAUCAUA	Bra029356	A02	+	25103670	25115749	12080	antisense
novel-m0383-3p	novel_circ_000324	1016	1036	-22.1	0.6443	UUUACGUAGUGAACUUCUCCA	||||||||||||x|o|x|||x	AAAUGCAUCACUAGGAAAGGA	Bra029356	A02	+	25103670	25115749	12080	antisense
novel-m0420-5p	novel_circ_000324	6833	6853	-21.7	0.7068	AUUUGAGAACUUAUUUAGUAU	|o|||x|||||||||||||||	UGAACCCUUGAAUAAAUCAUA	Bra029356	A02	+	25103670	25115749	12080	antisense
novel-m0483-5p	novel_circ_000324	6833	6853	-21.7	0.7068	AUUUGAGAACUUAUUUAGUAU	|o|||x|||||||||||||||	UGAACCCUUGAAUAAAUCAUA	Bra029356	A02	+	25103670	25115749	12080	antisense
novel-m0583-5p	novel_circ_000324	6833	6853	-21.7	0.7068	AUUUGAGAACUUAUUUAGUAU	|o|||x|||||||||||||||	UGAACCCUUGAAUAAAUCAUA	Bra029356	A02	+	25103670	25115749	12080	antisense
novel-m0635-5p	novel_circ_000324	6833	6853	-21.7	0.7068	AUUUGAGAACUUAUUUAGUAU	|o|||x|||||||||||||||	UGAACCCUUGAAUAAAUCAUA	Bra029356	A02	+	25103670	25115749	12080	antisense
novel-m0676-5p	novel_circ_000324	6833	6853	-21.7	0.7068	AUUUGAGAACUUAUUUAGUAU	|o|||x|||||||||||||||	UGAACCCUUGAAUAAAUCAUA	Bra029356	A02	+	25103670	25115749	12080	antisense
novel-m0694-5p	novel_circ_000324	6833	6853	-21.7	0.7068	AUUUGAGAACUUAUUUAGUAU	|o|||x|||||||||||||||	UGAACCCUUGAAUAAAUCAUA	Bra029356	A02	+	25103670	25115749	12080	antisense
novel-m0754-5p	novel_circ_000324	6851	6871	-27.8	0.7165	UUUGGAAAUCCAUUUGGGAUU	|||||x||o||||||||||o|	AAACCCUUGGGUAAACCCUGA	Bra029356	A02	+	25103670	25115749	12080	antisense
novel-m0890-5p	novel_circ_000324	6833	6853	-21.7	0.7068	AUUUGAGAACUUAUUUAGUAU	|o|||x|||||||||||||||	UGAACCCUUGAAUAAAUCAUA	Bra029356	A02	+	25103670	25115749	12080	antisense
novel-m0946-5p	novel_circ_000324	6833	6853	-21.7	0.7068	AUUUGAGAACUUAUUUAGUAU	|o|||x|||||||||||||||	UGAACCCUUGAAUAAAUCAUA	Bra029356	A02	+	25103670	25115749	12080	antisense
miR5021-x	novel_circ_000325	1042	1059	-22.8	0.755	CUCCUCUGCUUCUUCUCC	|||x||||||||||||xx	GAGAAGACGAAGAAGAAC	Bra029326	A02	-	25309412	25315279	5015	exon_intron
novel-m0067-3p	novel_circ_000330	675	695	-17	0.605	UCUAUCUACACACUAUUCCUG	|x|||x||||||xx|||||||	AAAUAUAUGUGUAUUAAGGAC	Bra031874	A02	-	26455225	26456033	724	exon_intron
novel-m0650-3p	novel_circ_000330	675	695	-17	0.605	UCUAUCUACACACUAUUCCUG	|x|||x||||||xx|||||||	AAAUAUAUGUGUAUUAAGGAC	Bra031874	A02	-	26455225	26456033	724	exon_intron
miR5153-y	novel_circ_000334	5900	5918	-30.3	0.8347	CGCCCGGGGUGAUUGUGCA	||||xoo||||||||||||	GCGGAUUCCACUAACACGU	Bra005938	A03	+	1316508	1327337	10830	antisense
novel-m0156-3p	novel_circ_000336	4330	4350	-33.1	1	GGUUUUGGUGGGUAUUUCAAA	|||||||||||||||||||||	CCAAAACCACCCAUAAAGUUU	Bra005998	A03	-	1542139	1551368	9230	exon_intron
novel-m0716-3p	novel_circ_000336	4330	4350	-33.1	1	GGUUUUGGUGGGUAUUUCAAA	|||||||||||||||||||||	CCAAAACCACCCAUAAAGUUU	Bra005998	A03	-	1542139	1551368	9230	exon_intron
novel-m0797-3p	novel_circ_000336	4330	4350	-33.1	1	GGUUUUGGUGGGUAUUUCAAA	|||||||||||||||||||||	CCAAAACCACCCAUAAAGUUU	Bra005998	A03	-	1542139	1551368	9230	exon_intron
miR7121-x	novel_circ_000339	746	763	-23.8	0.6959	GAGGAGGAACACUUGACG	||||||o|x|||||||x|	CUCCUCUUGGUGAACUCC	Bra006035	A03	-	1697755	1699156	763	annot_exons
miR319-x	novel_circ_000346	1862	1880	-24.7	0.6676	CUCGUUAGAAGCCAGCUUA	||||xx|||||||||x|x|	GAGCUUUCUUCGGUCCACU	Bra006215	A03	-	2552413	2558523	5607	exon_intron
miR319-x	novel_circ_000347	1868	1886	-24.7	0.6676	CUCGUUAGAAGCCAGCUUA	||||xx|||||||||x|x|	GAGCUUUCUUCGGUCCACU	Bra006215	A03	-	2552419	2558529	5607	exon_intron
miR2275-x	novel_circ_000350	2655	2672	-19.2	0.6713	UUGUCUCCUUUACUUUGA	|x|o|||||||x||||||	AUCGGAGGAAAAGAAACU	Bra006348	A03	+	3119311	3132090	12780	exon_intron
miR5656-y	novel_circ_000351	5806	5823	-22	0.6567	GCCCUUCGUCUCUGAACC	x|x||||o|||||||x||	AGUGAAGUAGAGACUGGG	Bra006347	A03	-	3119311	3132090	9033	exon_intron
miR5658-x	novel_circ_000351	7940	7959	-23.4	0.7312	CUAGUACUUCUUCUGCUACC	|||o||||x||x|||||||x	GAUUAUGAUGAUGACGAUGA	Bra006347	A03	-	3119311	3132090	9033	exon_intron
miR3437-y	novel_circ_000353	1215	1233	-18.1	0.6606	UAGCUACCAACAAUAGCAA	||||o|||x||||||ox||	AUCGGUGGAUGUUAUUUUU	Bra006386	A03	+	3287284	3298157	10874	antisense
miR5568-x	novel_circ_000353	9068	9087	-18	0.6164	CAAAGUUUAAUAAACAGCAA	|||x||||||||x|||||||	GUUCCAAAUUAUAUGUCGUU	Bra006386	A03	+	3287284	3298157	10874	antisense
miR319-x	novel_circ_000362	3327	3345	-25.2	0.6904	CUCGGAAGAAGCCAUUUGU	||||o|||||||||xx||x	GAGCUUUCUUCGGUCCACU	Bra006452	A03	-	3543498	3555243	10648	exon_intron
miR5021-x	novel_circ_000362	4806	4823	-25.5	0.8528	CUCUUCUGCUUCUUCAAC	|||||||||||||||xxx	GAGAAGACGAAGAAGAAC	Bra006452	A03	-	3543498	3555243	10648	exon_intron
miR5021-x	novel_circ_000362	7640	7657	-24.6	0.791	GUCUUCUGCUUCUUCUAC	x|||||||||||||||xx	GAGAAGACGAAGAAGAAC	Bra006452	A03	-	3543498	3555243	10648	exon_intron
miR529-x	novel_circ_000362	8299	8316	-26.3	0.6337	CACUCUCUCCUGAAGGAG	|x||||||||||xx||||	GCGAGAGAGGACCGCCUC	Bra006452	A03	-	3543498	3555243	10648	exon_intron
miR825-x	novel_circ_000362	1218	1239	-34.4	0.7872	GGUUUGUGGUCGAACUUCUUCG	o|||o||||||||x||||||||	UCAAGCACCAGCUCGAAGAAGC	Bra006452	A03	-	3543498	3555243	10648	exon_intron
novel-m0127-5p	novel_circ_000362	4750	4770	-24.4	0.6421	GCUAAGUCCUAAGAUUGGCGG	o|||||||||||x|x|x||||	UGAUUCAGGAUUGUCAACGCC	Bra006452	A03	-	3543498	3555243	10648	exon_intron
miR2275-x	novel_circ_000366	6790	6807	-17.8	0.6202	UAGUCUUCUUUAUUUUGA	|||o||o||||xo|||||	AUCGGAGGAAAAGAAACU	Bra006679	A03	-	4590285	4599235	8689	exon_intron
miR2275-x	novel_circ_000367	6914	6931	-17.8	0.6202	UAGUCUUCUUUAUUUUGA	|||o||o||||xo|||||	AUCGGAGGAAAAGAAACU	Bra006679	A03	-	4590554	4599600	8544	exon_intron
miR2275-x	novel_circ_000368	7406	7423	-17.8	0.6202	UAGUCUUCUUUAUUUUGA	|||o||o||||xo|||||	AUCGGAGGAAAAGAAACU	Bra006679	A03	-	4591555	4600650	8035	exon_intron
miR2275-x	novel_circ_000369	7502	7519	-17.8	0.6202	UAGUCUUCUUUAUUUUGA	|||o||o||||xo|||||	AUCGGAGGAAAAGAAACU	Bra006679	A03	-	4591555	4600746	8131	exon_intron
miR11470-x	novel_circ_000374	113	131	-19.8	0.6622	CGACCCUAACUCGUAACUA	xo|x||||||||x||||||	CUUUGGAUUGAGGAUUGAU	Bra028949	A03	-	5562808	5582472	19152	exon_intron
miR319-x	novel_circ_000374	8086	8104	-26.5	0.7162	CUCGAAAGAAGUGAGGAAA	|||||||||||ox|||xx|	GAGCUUUCUUCGGUCCACU	Bra028949	A03	-	5562808	5582472	19152	exon_intron
miR5021-x	novel_circ_000374	524	541	-20.7	0.6656	CUCUUCUUCUUUUUCCUU	|||||||x|||o|||x|x	GAGAAGACGAAGAAGAAC	Bra028949	A03	-	5562808	5582472	19152	exon_intron
miR5021-x	novel_circ_000374	1373	1390	-20.3	0.6789	CUCUUCUUUUUCUUCUUC	|||||||xo||||||||x	GAGAAGACGAAGAAGAAC	Bra028949	A03	-	5562808	5582472	19152	exon_intron
miR1134-y	novel_circ_000380	41	59	-18.1	0.6115	UUCGUCUUCUUCUCUUCCU	|||||x|||||||xo|x||	AAGCACAAGAAGAAGAAGA	Bra029068	A03	-	6186325	6186517	193	antisense
novel-m0048-5p	novel_circ_000399	5437	5457	-24.9	0.6785	UCCCAAAUCUCAAUUCCCCAC	||x||||||||||o|||x|||	AGAGUUUAGAGUUGAGGAGUG	Bra000121	A03	-	9390145	9402906	9600	exon_intron
novel-m0101-3p	novel_circ_000399	5437	5457	-27.6	0.8023	UCCCAAAUCUCAAUUCCCCAC	|x|x|||||||||||||||||	AUGAUUUAGAGUUAAGGGGUG	Bra000121	A03	-	9390145	9402906	9600	exon_intron
novel-m0117-3p	novel_circ_000399	5437	5457	-24.9	0.6785	UCCCAAAUCUCAAUUCCCCAC	||x||||||||||o|||x|||	AGAGUUUAGAGUUGAGGAGUG	Bra000121	A03	-	9390145	9402906	9600	exon_intron
novel-m0673-3p	novel_circ_000399	5437	5457	-24.9	0.6785	UCCCAAAUCUCAAUUCCCCAC	||x||||||||||o|||x|||	AGAGUUUAGAGUUGAGGAGUG	Bra000121	A03	-	9390145	9402906	9600	exon_intron
novel-m0766-3p	novel_circ_000399	5437	5457	-24.9	0.6785	UCCCAAAUCUCAAUUCCCCAC	||x||||||||||o|||x|||	AGAGUUUAGAGUUGAGGAGUG	Bra000121	A03	-	9390145	9402906	9600	exon_intron
novel-m0048-5p	novel_circ_000400	6085	6105	-24.9	0.6785	UCCCAAAUCUCAAUUCCCCAC	||x||||||||||o|||x|||	AGAGUUUAGAGUUGAGGAGUG	Bra000121	A03	-	9390582	9403554	10778	exon_intron
novel-m0101-3p	novel_circ_000400	6085	6105	-27.6	0.8023	UCCCAAAUCUCAAUUCCCCAC	|x|x|||||||||||||||||	AUGAUUUAGAGUUAAGGGGUG	Bra000121	A03	-	9390582	9403554	10778	exon_intron
novel-m0117-3p	novel_circ_000400	6085	6105	-24.9	0.6785	UCCCAAAUCUCAAUUCCCCAC	||x||||||||||o|||x|||	AGAGUUUAGAGUUGAGGAGUG	Bra000121	A03	-	9390582	9403554	10778	exon_intron
novel-m0673-3p	novel_circ_000400	6085	6105	-24.9	0.6785	UCCCAAAUCUCAAUUCCCCAC	||x||||||||||o|||x|||	AGAGUUUAGAGUUGAGGAGUG	Bra000121	A03	-	9390582	9403554	10778	exon_intron
novel-m0766-3p	novel_circ_000400	6085	6105	-24.9	0.6785	UCCCAAAUCUCAAUUCCCCAC	||x||||||||||o|||x|||	AGAGUUUAGAGUUGAGGAGUG	Bra000121	A03	-	9390582	9403554	10778	exon_intron
novel-m0048-5p	novel_circ_000401	20140	20160	-24.9	0.6785	UCCCAAAUCUCAAUUCCCCAC	||x||||||||||o|||x|||	AGAGUUUAGAGUUGAGGAGUG	Bra000122	A03	-	9390859	9419242	26751	exon_intron
novel-m0101-3p	novel_circ_000401	20140	20160	-27.6	0.8023	UCCCAAAUCUCAAUUCCCCAC	|x|x|||||||||||||||||	AUGAUUUAGAGUUAAGGGGUG	Bra000122	A03	-	9390859	9419242	26751	exon_intron
novel-m0117-3p	novel_circ_000401	20140	20160	-24.9	0.6785	UCCCAAAUCUCAAUUCCCCAC	||x||||||||||o|||x|||	AGAGUUUAGAGUUGAGGAGUG	Bra000122	A03	-	9390859	9419242	26751	exon_intron
novel-m0310-3p	novel_circ_000401	9146	9166	-24.4	0.7649	UUGUGGUAACCUCGUUUUCAA	x|x|||||||||||||||x||	UAAACCAUUGGAGCAAAACUU	Bra000122	A03	-	9390859	9419242	26751	exon_intron
novel-m0516-3p	novel_circ_000401	10152	10173	-41	0.9131	CGCUAACCAUCGCCAACUGUCG	x||o||||||||||||||||||	ACGGUUGGUAGCGGUUGACAGC	Bra000122	A03	-	9390859	9419242	26751	exon_intron
novel-m0657-3p	novel_circ_000401	10152	10173	-41	0.9131	CGCUAACCAUCGCCAACUGUCG	x||o||||||||||||||||||	ACGGUUGGUAGCGGUUGACAGC	Bra000122	A03	-	9390859	9419242	26751	exon_intron
novel-m0673-3p	novel_circ_000401	20140	20160	-24.9	0.6785	UCCCAAAUCUCAAUUCCCCAC	||x||||||||||o|||x|||	AGAGUUUAGAGUUGAGGAGUG	Bra000122	A03	-	9390859	9419242	26751	exon_intron
novel-m0766-3p	novel_circ_000401	20140	20160	-24.9	0.6785	UCCCAAAUCUCAAUUCCCCAC	||x||||||||||o|||x|||	AGAGUUUAGAGUUGAGGAGUG	Bra000122	A03	-	9390859	9419242	26751	exon_intron
novel-m0859-5p	novel_circ_000401	9367	9389	-26.5	0.6355	UUCUGGUAGAGGUUCCCGUGAGA	||||||||||||||x|xo||x||	AAGACCAUCUCCAAUGCUACACU	Bra000122	A03	-	9390859	9419242	26751	exon_intron
bra-miR824	novel_circ_000413	2863	2883	-26.6	0.7112	UUUUGGUAAACACUCUCGCCU	x|o|||||||||||||xx|||	UAGACCAUUUGUGAGAAGGGA	Bra000592	A03	-	11957303	11962955	5582	exon_intron
novel-m0194-5p	novel_circ_000413	2867	2887	-27.2	0.7727	GCAGUUUUGGUAAACACUCUC	o|||x|o|||||||||||||x	UGUCUAGACCAUUUGUGAGAA	Bra000592	A03	-	11957303	11962955	5582	exon_intron
bra-miR824	novel_circ_000414	3339	3359	-26.6	0.7112	UUUUGGUAAACACUCUCGCCU	x|o|||||||||||||xx|||	UAGACCAUUUGUGAGAAGGGA	Bra000592	A03	-	11957855	11963501	5506	exon_intron
novel-m0194-5p	novel_circ_000414	3343	3363	-27.2	0.7727	GCAGUUUUGGUAAACACUCUC	o|||x|o|||||||||||||x	UGUCUAGACCAUUUGUGAGAA	Bra000592	A03	-	11957855	11963501	5506	exon_intron
miR1134-y	novel_circ_000427	33204	33222	-22	0.7309	UUCUUCUUCUUCUCCUUCU	|||x|x|||||||x|||||	AAGCACAAGAAGAAGAAGA	Bra001091	A03	-	14704476	14759748	53547	exon_intron
miR3511-x	novel_circ_000427	52571	52588	-21	0.7167	UUCCGGUAGUUCCUUCUC	||||||||x||x|||||x	AAGGCCAUGAAUGAAGAA	Bra001091	A03	-	14704476	14759748	53547	exon_intron
miR5021-x	novel_circ_000427	48276	48293	-21.8	0.701	CUCUUUUGCUUCUUGGUG	|||||o||||||||xx||	GAGAAGACGAAGAAGAAC	Bra001091	A03	-	14704476	14759748	53547	exon_intron
miR5656-y	novel_circ_000427	1216	1233	-20.8	0.6284	UGACUUCGUCUCGGACAC	|x|||||o||||x|||x|	AGUGAAGUAGAGACUGGG	Bra001091	A03	-	14704476	14759748	53547	exon_intron
miR6031-x	novel_circ_000427	5343	5366	-45.1	1	UACUCUAAGCCUCGCCAAACUUCG	||||||||||||||||||||||||	AUGAGAUUCGGAGCGGUUUGAAGC	Bra001091	A03	-	14704476	14759748	53547	exon_intron
novel-m0051-5p	novel_circ_000427	5337	5359	-23.2	0.6203	AGCCUCGCCAAACUUCGCCAAAU	|o|x||||x||||x|||||||||	UUGAAGCGAUUUGUAGCGGUUUA	Bra001091	A03	-	14704476	14759748	53547	exon_intron
bra-miR156a-3p	novel_circ_000438	7987	8007	-31.8	0.7681	CGAGUGAGAGAGAGAGAGAGA	|||o|||||||||||x||x|x	GCUUACUCUCUCUCUGUCACC	Bra001526	A03	+	16873223	16884001	9659	exon_intron
miR7121-x	novel_circ_000438	4906	4923	-22.4	0.64	GAGGAGAAUCACUAAAGA	||||||||o||||xx||x	CUCCUCUUGGUGAACUCC	Bra001526	A03	+	16873223	16884001	9659	exon_intron
novel-m0840-3p	novel_circ_000438	1063	1083	-23.1	0.6619	AGGUAGUGAAGUAAAAGGAGG	|o|||||||||||||x||x|o	UUCAUCACUUCAUUUCCCACU	Bra001526	A03	+	16873223	16884001	9659	exon_intron
bra-miR156a-3p	novel_circ_000440	7987	8007	-31.8	0.7681	CGAGUGAGAGAGAGAGAGAGA	|||o|||||||||||x||x|x	GCUUACUCUCUCUCUGUCACC	Bra001526	A03	+	16873223	16895673	21331	exon_intron
bra-miR156a-3p	novel_circ_000440	18940	18960	-31.8	0.7681	CGAGUGAGAGAGAGAGAGAGA	|||o|||||||||||x||x|x	GCUUACUCUCUCUCUGUCACC	Bra001526	A03	+	16873223	16895673	21331	exon_intron
miR7121-x	novel_circ_000440	4906	4923	-22.4	0.64	GAGGAGAAUCACUAAAGA	||||||||o||||xx||x	CUCCUCUUGGUGAACUCC	Bra001526	A03	+	16873223	16895673	21331	exon_intron
miR7121-x	novel_circ_000440	15140	15157	-22.4	0.64	GAGGAGAAUCACUAAAGA	||||||||o||||xx||x	CUCCUCUUGGUGAACUCC	Bra001526	A03	+	16873223	16895673	21331	exon_intron
novel-m0840-3p	novel_circ_000440	1063	1083	-23.1	0.6619	AGGUAGUGAAGUAAAAGGAGG	|o|||||||||||||x||x|o	UUCAUCACUUCAUUUCCCACU	Bra001526	A03	+	16873223	16895673	21331	exon_intron
miR3699-y	novel_circ_000441	6264	6281	-18.6	0.6838	CACUGUGUUCUUUGUCGA	x|||||x||||||x||o|	UUGACAGAAGAAAGAGUU	Bra001525	A03	-	16873223	16895673	19794	exon_intron
bra-miR156a-3p	novel_circ_000442	7984	8004	-31.8	0.7681	CGAGUGAGAGAGAGAGAGAGA	|||o|||||||||||x||x|x	GCUUACUCUCUCUCUGUCACC	Bra001526	A03	+	16873226	16884004	9659	exon_intron
miR7121-x	novel_circ_000442	4903	4920	-22.4	0.64	GAGGAGAAUCACUAAAGA	||||||||o||||xx||x	CUCCUCUUGGUGAACUCC	Bra001526	A03	+	16873226	16884004	9659	exon_intron
novel-m0840-3p	novel_circ_000442	1060	1080	-23.1	0.6619	AGGUAGUGAAGUAAAAGGAGG	|o|||||||||||||x||x|o	UUCAUCACUUCAUUUCCCACU	Bra001526	A03	+	16873226	16884004	9659	exon_intron
miR3699-y	novel_circ_000445	6003	6020	-18.6	0.6838	CACUGUGUUCUUUGUCGA	x|||||x||||||x||o|	UUGACAGAAGAAAGAGUU	Bra001525	A03	-	16873231	16895412	19525	exon_intron
bra-miR395a-5p	novel_circ_000446	620	640	-24.2	0.6221	CUAGGAGACUCAGUAAGUAAC	|x|||||||||xxx|||||||	GUUCCUCUGAGCACUUCAUUG	Bra001537	A03	+	16930657	16931383	727	antisense
bra-miR395b-5p	novel_circ_000446	620	640	-24.2	0.6221	CUAGGAGACUCAGUAAGUAAC	|x|||||||||xxx|||||||	GUUCCUCUGAGCACUUCAUUG	Bra001537	A03	+	16930657	16931383	727	antisense
bra-miR395c-5p	novel_circ_000446	620	640	-24.2	0.6221	CUAGGAGACUCAGUAAGUAAC	|x|||||||||xxx|||||||	GUUCCUCUGAGCACUUCAUUG	Bra001537	A03	+	16930657	16931383	727	antisense
bra-miR395d-5p	novel_circ_000446	620	640	-24.2	0.6221	CUAGGAGACUCAGUAAGUAAC	|x|||||||||xxx|||||||	GUUCCUCUGAGCACUUCAUUG	Bra001537	A03	+	16930657	16931383	727	antisense
novel-m0126-5p	novel_circ_000446	624	644	-24.5	0.625	AUCUCUAGGAGACUCAGUAAG	|||||x|||||||||xxx|||	UAGAGUUCCUCUGAGCACUUC	Bra001537	A03	+	16930657	16931383	727	antisense
novel-m0588-5p	novel_circ_000446	621	641	-21.5	0.6214	UCUAGGAGACUCAGUAAGUAA	|||||||||||xxxx||||||	AGAUCCUCUGAACACUUCAUU	Bra001537	A03	+	16930657	16931383	727	antisense
novel-m0617-5p	novel_circ_000446	624	644	-24.5	0.625	AUCUCUAGGAGACUCAGUAAG	|||||x|||||||||xxx|||	UAGAGUUCCUCUGAGCACUUC	Bra001537	A03	+	16930657	16931383	727	antisense
novel-m0689-5p	novel_circ_000446	624	644	-24.5	0.625	AUCUCUAGGAGACUCAGUAAG	|||||x|||||||||xxx|||	UAGAGUUCCUCUGAGCACUUC	Bra001537	A03	+	16930657	16931383	727	antisense
novel-m0064-5p	novel_circ_000447	14011	14033	-34.6	0.9914	UAUUGUACCUAGAAAAUCCUUGC	||||||||||||||||||||||x	AUAACAUGGAUCUUUUAGGAACA	Bra001676	A03	+	17816254	17838291	21013	exon_intron
novel-m0632-3p	novel_circ_000447	14011	14033	-34.6	0.9914	UAUUGUACCUAGAAAAUCCUUGC	||||||||||||||||||||||x	AUAACAUGGAUCUUUUAGGAACA	Bra001676	A03	+	17816254	17838291	21013	exon_intron
novel-m0633-3p	novel_circ_000447	14011	14033	-34.6	0.9914	UAUUGUACCUAGAAAAUCCUUGC	||||||||||||||||||||||x	AUAACAUGGAUCUUUUAGGAACA	Bra001676	A03	+	17816254	17838291	21013	exon_intron
novel-m0064-5p	novel_circ_000449	13487	13509	-34.6	0.9914	UAUUGUACCUAGAAAAUCCUUGC	||||||||||||||||||||||x	AUAACAUGGAUCUUUUAGGAACA	Bra001676	A03	+	17816778	17839363	21561	exon_intron
novel-m0632-3p	novel_circ_000449	13487	13509	-34.6	0.9914	UAUUGUACCUAGAAAAUCCUUGC	||||||||||||||||||||||x	AUAACAUGGAUCUUUUAGGAACA	Bra001676	A03	+	17816778	17839363	21561	exon_intron
novel-m0633-3p	novel_circ_000449	13487	13509	-34.6	0.9914	UAUUGUACCUAGAAAAUCCUUGC	||||||||||||||||||||||x	AUAACAUGGAUCUUUUAGGAACA	Bra001676	A03	+	17816778	17839363	21561	exon_intron
novel-m0135-3p	novel_circ_000453	16092	16112	-24.2	0.7832	AUCCUAAAUCCCAAAUCACAA	||x||||||||||||||xx||	UAUGAUUUAGGGUUUAGGAUU	Bra001726	A03	+	18086873	18106311	17092	exon_intron
novel-m0135-3p	novel_circ_000453	16113	16133	-24.2	0.7832	AUCCUAAAUCCCAAAUCCCUA	||x|||||||||||||||xx|	UAUGAUUUAGGGUUUAGGAUU	Bra001726	A03	+	18086873	18106311	17092	exon_intron
novel-m0350-5p	novel_circ_000453	15872	15892	-30	0.9259	ACUUGGGUUCUUAUUGAGAUA	||||||||||||||||||xx|	UGAACCCAAGAAUAACUCAUU	Bra001726	A03	+	18086873	18106311	17092	exon_intron
novel-m0399-3p	novel_circ_000453	16088	16108	-31.7	0.9784	UAAAUCCCAAAUCACAAAACG	|||||||||||||x|x||x|x	AUUUAGGGUUUAGGGAUUAGA	Bra001726	A03	+	18086873	18106311	17092	exon_intron
novel-m0399-3p	novel_circ_000453	16109	16129	-31.7	0.9814	UAAAUCCCAAAUCCCUAAUCC	||||||||||||||||||||x	AUUUAGGGUUUAGGGAUUAGA	Bra001726	A03	+	18086873	18106311	17092	exon_intron
novel-m0760-3p	novel_circ_000453	16092	16113	-26.8	0.8508	AAUCCUAAAUCCCAAAUCACAA	||||||||||||x|||||||||	UUAGGAUUUAGGAUUUAGUGUU	Bra001726	A03	+	18086873	18106311	17092	exon_intron
novel-m0760-3p	novel_circ_000453	16120	16141	-26.8	0.8454	AAUCCCAAAUCCUAAAUCCCAA	|||||x||||||||||||x|||	UUAGGAUUUAGGAUUUAGUGUU	Bra001726	A03	+	18086873	18106311	17092	exon_intron
novel-m0812-3p	novel_circ_000453	16088	16108	-31.7	0.9784	UAAAUCCCAAAUCACAAAACG	|||||||||||||x|x||x|x	AUUUAGGGUUUAGGGAUUAGA	Bra001726	A03	+	18086873	18106311	17092	exon_intron
novel-m0812-3p	novel_circ_000453	16109	16129	-31.7	0.9814	UAAAUCCCAAAUCCCUAAUCC	||||||||||||||||||||x	AUUUAGGGUUUAGGGAUUAGA	Bra001726	A03	+	18086873	18106311	17092	exon_intron
novel-m0135-3p	novel_circ_000454	16092	16112	-24.2	0.7832	AUCCUAAAUCCCAAAUCACAA	||x||||||||||||||xx||	UAUGAUUUAGGGUUUAGGAUU	Bra001726	A03	+	18086873	18107462	18243	exon_intron
novel-m0135-3p	novel_circ_000454	16113	16133	-24.2	0.7832	AUCCUAAAUCCCAAAUCCCUA	||x|||||||||||||||xx|	UAUGAUUUAGGGUUUAGGAUU	Bra001726	A03	+	18086873	18107462	18243	exon_intron
novel-m0350-5p	novel_circ_000454	15872	15892	-30	0.9259	ACUUGGGUUCUUAUUGAGAUA	||||||||||||||||||xx|	UGAACCCAAGAAUAACUCAUU	Bra001726	A03	+	18086873	18107462	18243	exon_intron
novel-m0399-3p	novel_circ_000454	16088	16108	-31.7	0.9784	UAAAUCCCAAAUCACAAAACG	|||||||||||||x|x||x|x	AUUUAGGGUUUAGGGAUUAGA	Bra001726	A03	+	18086873	18107462	18243	exon_intron
novel-m0399-3p	novel_circ_000454	16109	16129	-31.7	0.9814	UAAAUCCCAAAUCCCUAAUCC	||||||||||||||||||||x	AUUUAGGGUUUAGGGAUUAGA	Bra001726	A03	+	18086873	18107462	18243	exon_intron
novel-m0760-3p	novel_circ_000454	16092	16113	-26.8	0.8508	AAUCCUAAAUCCCAAAUCACAA	||||||||||||x|||||||||	UUAGGAUUUAGGAUUUAGUGUU	Bra001726	A03	+	18086873	18107462	18243	exon_intron
novel-m0760-3p	novel_circ_000454	16120	16141	-26.8	0.8454	AAUCCCAAAUCCUAAAUCCCAA	|||||x||||||||||||x|||	UUAGGAUUUAGGAUUUAGUGUU	Bra001726	A03	+	18086873	18107462	18243	exon_intron
novel-m0812-3p	novel_circ_000454	16088	16108	-31.7	0.9784	UAAAUCCCAAAUCACAAAACG	|||||||||||||x|x||x|x	AUUUAGGGUUUAGGGAUUAGA	Bra001726	A03	+	18086873	18107462	18243	exon_intron
novel-m0812-3p	novel_circ_000454	16109	16129	-31.7	0.9814	UAAAUCCCAAAUCCCUAAUCC	||||||||||||||||||||x	AUUUAGGGUUUAGGGAUUAGA	Bra001726	A03	+	18086873	18107462	18243	exon_intron
novel-m0135-3p	novel_circ_000455	16092	16112	-24.2	0.7832	AUCCUAAAUCCCAAAUCACAA	||x||||||||||||||xx||	UAUGAUUUAGGGUUUAGGAUU	Bra001726	A03	+	18086873	18107519	18300	exon_intron
novel-m0135-3p	novel_circ_000455	16113	16133	-24.2	0.7832	AUCCUAAAUCCCAAAUCCCUA	||x|||||||||||||||xx|	UAUGAUUUAGGGUUUAGGAUU	Bra001726	A03	+	18086873	18107519	18300	exon_intron
novel-m0350-5p	novel_circ_000455	15872	15892	-30	0.9259	ACUUGGGUUCUUAUUGAGAUA	||||||||||||||||||xx|	UGAACCCAAGAAUAACUCAUU	Bra001726	A03	+	18086873	18107519	18300	exon_intron
novel-m0399-3p	novel_circ_000455	16088	16108	-31.7	0.9784	UAAAUCCCAAAUCACAAAACG	|||||||||||||x|x||x|x	AUUUAGGGUUUAGGGAUUAGA	Bra001726	A03	+	18086873	18107519	18300	exon_intron
novel-m0399-3p	novel_circ_000455	16109	16129	-31.7	0.9814	UAAAUCCCAAAUCCCUAAUCC	||||||||||||||||||||x	AUUUAGGGUUUAGGGAUUAGA	Bra001726	A03	+	18086873	18107519	18300	exon_intron
novel-m0760-3p	novel_circ_000455	16092	16113	-26.8	0.8508	AAUCCUAAAUCCCAAAUCACAA	||||||||||||x|||||||||	UUAGGAUUUAGGAUUUAGUGUU	Bra001726	A03	+	18086873	18107519	18300	exon_intron
novel-m0760-3p	novel_circ_000455	16120	16141	-26.8	0.8454	AAUCCCAAAUCCUAAAUCCCAA	|||||x||||||||||||x|||	UUAGGAUUUAGGAUUUAGUGUU	Bra001726	A03	+	18086873	18107519	18300	exon_intron
novel-m0812-3p	novel_circ_000455	16088	16108	-31.7	0.9784	UAAAUCCCAAAUCACAAAACG	|||||||||||||x|x||x|x	AUUUAGGGUUUAGGGAUUAGA	Bra001726	A03	+	18086873	18107519	18300	exon_intron
novel-m0812-3p	novel_circ_000455	16109	16129	-31.7	0.9814	UAAAUCCCAAAUCCCUAAUCC	||||||||||||||||||||x	AUUUAGGGUUUAGGGAUUAGA	Bra001726	A03	+	18086873	18107519	18300	exon_intron
novel-m0062-5p	novel_circ_000480	1059	1079	-21.8	0.7171	ACUUGGGUUCUUAUUGAGUAU	|||||||xx||||||x|||||	UGAACCCUUGAAUAAAUCAUA	Bra012570	A03	-	23512909	23517152	4244	antisense
novel-m0071-5p	novel_circ_000480	1059	1079	-21.8	0.7171	ACUUGGGUUCUUAUUGAGUAU	|||||||xx||||||x|||||	UGAACCCUUGAAUAAAUCAUA	Bra012570	A03	-	23512909	23517152	4244	antisense
novel-m0135-3p	novel_circ_000480	1270	1290	-28.2	0.9126	AUCCUAAAUCCCAAAUCACAA	||x||||||||||||||xx||	UAUGAUUUAGGGUUUAGGAUU	Bra012570	A03	-	23512909	23517152	4244	antisense
novel-m0135-3p	novel_circ_000480	1291	1311	-28.2	0.9126	AUACUAAAUCCCAAAUCCCUA	||||||||||||||||||xx|	UAUGAUUUAGGGUUUAGGAUU	Bra012570	A03	-	23512909	23517152	4244	antisense
novel-m0135-3p	novel_circ_000480	1388	1408	-21.5	0.6958	AUCCUAAAUCCCAAAUUCCAA	||x|||||||||||||o|x||	UAUGAUUUAGGGUUUAGGAUU	Bra012570	A03	-	23512909	23517152	4244	antisense
novel-m0161-3p	novel_circ_000480	1297	1317	-23.7	0.7315	UCCCAAAUACUAAAUCCCAAA	||x|||||x||||||||||||	AGAGUUUAGGAUUUAGGGUUU	Bra012570	A03	-	23512909	23517152	4244	antisense
novel-m0161-3p	novel_circ_000480	1372	1392	-27	0.8464	UCCAAAAUUCUAAAUCACAAA	||xx||||o|||||||x||||	AGAGUUUAGGAUUUAGGGUUU	Bra012570	A03	-	23512909	23517152	4244	antisense
novel-m0161-3p	novel_circ_000480	1394	1414	-27	0.8491	UCCCAAAUCCUAAAUCCCAAA	||x||||||||||||||||||	AGAGUUUAGGAUUUAGGGUUU	Bra012570	A03	-	23512909	23517152	4244	antisense
novel-m0225-3p	novel_circ_000480	1297	1317	-23.7	0.7315	UCCCAAAUACUAAAUCCCAAA	||x|||||x||||||||||||	AGAGUUUAGGAUUUAGGGUUU	Bra012570	A03	-	23512909	23517152	4244	antisense
novel-m0225-3p	novel_circ_000480	1372	1392	-27	0.8464	UCCAAAAUUCUAAAUCACAAA	||xx||||o|||||||x||||	AGAGUUUAGGAUUUAGGGUUU	Bra012570	A03	-	23512909	23517152	4244	antisense
novel-m0225-3p	novel_circ_000480	1394	1414	-27	0.8491	UCCCAAAUCCUAAAUCCCAAA	||x||||||||||||||||||	AGAGUUUAGGAUUUAGGGUUU	Bra012570	A03	-	23512909	23517152	4244	antisense
novel-m0350-5p	novel_circ_000480	1059	1079	-31.7	0.9814	ACUUGGGUUCUUAUUGAGUAU	||||||||||||||||||||x	UGAACCCAAGAAUAACUCAUU	Bra012570	A03	-	23512909	23517152	4244	antisense
novel-m0362-5p	novel_circ_000480	1059	1079	-21.8	0.7171	ACUUGGGUUCUUAUUGAGUAU	|||||||xx||||||x|||||	UGAACCCUUGAAUAAAUCAUA	Bra012570	A03	-	23512909	23517152	4244	antisense
novel-m0370-5p	novel_circ_000480	1059	1079	-21.8	0.7171	ACUUGGGUUCUUAUUGAGUAU	|||||||xx||||||x|||||	UGAACCCUUGAAUAAAUCAUA	Bra012570	A03	-	23512909	23517152	4244	antisense
novel-m0392-3p	novel_circ_000480	1297	1317	-23.7	0.7315	UCCCAAAUACUAAAUCCCAAA	||x|||||x||||||||||||	AGAGUUUAGGAUUUAGGGUUU	Bra012570	A03	-	23512909	23517152	4244	antisense
novel-m0392-3p	novel_circ_000480	1372	1392	-27	0.8464	UCCAAAAUUCUAAAUCACAAA	||xx||||o|||||||x||||	AGAGUUUAGGAUUUAGGGUUU	Bra012570	A03	-	23512909	23517152	4244	antisense
novel-m0392-3p	novel_circ_000480	1394	1414	-27	0.8491	UCCCAAAUCCUAAAUCCCAAA	||x||||||||||||||||||	AGAGUUUAGGAUUUAGGGUUU	Bra012570	A03	-	23512909	23517152	4244	antisense
novel-m0399-3p	novel_circ_000480	1287	1307	-31.7	0.9814	UAAAUCCCAAAUCCCUAAUCC	||||||||||||||||||||x	AUUUAGGGUUUAGGGAUUAGA	Bra012570	A03	-	23512909	23517152	4244	antisense
novel-m0399-3p	novel_circ_000480	1384	1404	-21.4	0.6646	UAAAUCCCAAAUUCCAAAAUU	||||||||||||o||x||xo|	AUUUAGGGUUUAGGGAUUAGA	Bra012570	A03	-	23512909	23517152	4244	antisense
novel-m0420-5p	novel_circ_000480	1059	1079	-21.8	0.7171	ACUUGGGUUCUUAUUGAGUAU	|||||||xx||||||x|||||	UGAACCCUUGAAUAAAUCAUA	Bra012570	A03	-	23512909	23517152	4244	antisense
novel-m0483-5p	novel_circ_000480	1059	1079	-21.8	0.7171	ACUUGGGUUCUUAUUGAGUAU	|||||||xx||||||x|||||	UGAACCCUUGAAUAAAUCAUA	Bra012570	A03	-	23512909	23517152	4244	antisense
novel-m0583-5p	novel_circ_000480	1059	1079	-21.8	0.7171	ACUUGGGUUCUUAUUGAGUAU	|||||||xx||||||x|||||	UGAACCCUUGAAUAAAUCAUA	Bra012570	A03	-	23512909	23517152	4244	antisense
novel-m0611-5p	novel_circ_000480	1297	1317	-23.7	0.7315	UCCCAAAUACUAAAUCCCAAA	||x|||||x||||||||||||	AGAGUUUAGGAUUUAGGGUUU	Bra012570	A03	-	23512909	23517152	4244	antisense
novel-m0611-5p	novel_circ_000480	1372	1392	-27	0.8464	UCCAAAAUUCUAAAUCACAAA	||xx||||o|||||||x||||	AGAGUUUAGGAUUUAGGGUUU	Bra012570	A03	-	23512909	23517152	4244	antisense
novel-m0611-5p	novel_circ_000480	1394	1414	-27	0.8491	UCCCAAAUCCUAAAUCCCAAA	||x||||||||||||||||||	AGAGUUUAGGAUUUAGGGUUU	Bra012570	A03	-	23512909	23517152	4244	antisense
novel-m0635-5p	novel_circ_000480	1059	1079	-21.8	0.7171	ACUUGGGUUCUUAUUGAGUAU	|||||||xx||||||x|||||	UGAACCCUUGAAUAAAUCAUA	Bra012570	A03	-	23512909	23517152	4244	antisense
novel-m0676-5p	novel_circ_000480	1059	1079	-21.8	0.7171	ACUUGGGUUCUUAUUGAGUAU	|||||||xx||||||x|||||	UGAACCCUUGAAUAAAUCAUA	Bra012570	A03	-	23512909	23517152	4244	antisense
novel-m0694-5p	novel_circ_000480	1059	1079	-21.8	0.7171	ACUUGGGUUCUUAUUGAGUAU	|||||||xx||||||x|||||	UGAACCCUUGAAUAAAUCAUA	Bra012570	A03	-	23512909	23517152	4244	antisense
novel-m0760-3p	novel_circ_000480	1270	1291	-26.8	0.8508	AAUCCUAAAUCCCAAAUCACAA	||||||||||||x|||||||||	UUAGGAUUUAGGAUUUAGUGUU	Bra012570	A03	-	23512909	23517152	4244	antisense
novel-m0760-3p	novel_circ_000480	1395	1416	-23.4	0.7382	GUUCCCAAAUCCUAAAUCCCAA	ox|||x||||||||||||x|||	UUAGGAUUUAGGAUUUAGUGUU	Bra012570	A03	-	23512909	23517152	4244	antisense
novel-m0812-3p	novel_circ_000480	1287	1307	-31.7	0.9814	UAAAUCCCAAAUCCCUAAUCC	||||||||||||||||||||x	AUUUAGGGUUUAGGGAUUAGA	Bra012570	A03	-	23512909	23517152	4244	antisense
novel-m0812-3p	novel_circ_000480	1384	1404	-21.4	0.6646	UAAAUCCCAAAUUCCAAAAUU	||||||||||||o||x||xo|	AUUUAGGGUUUAGGGAUUAGA	Bra012570	A03	-	23512909	23517152	4244	antisense
novel-m0890-5p	novel_circ_000480	1059	1079	-21.8	0.7171	ACUUGGGUUCUUAUUGAGUAU	|||||||xx||||||x|||||	UGAACCCUUGAAUAAAUCAUA	Bra012570	A03	-	23512909	23517152	4244	antisense
novel-m0946-5p	novel_circ_000480	1059	1079	-21.8	0.7171	ACUUGGGUUCUUAUUGAGUAU	|||||||xx||||||x|||||	UGAACCCUUGAAUAAAUCAUA	Bra012570	A03	-	23512909	23517152	4244	antisense
novel-m0062-5p	novel_circ_000481	1418	1438	-21.8	0.7171	ACUUGGGUUCUUAUUGAGUAU	|||||||xx||||||x|||||	UGAACCCUUGAAUAAAUCAUA	Bra012570	A03	-	23512909	23517511	4603	antisense
novel-m0071-5p	novel_circ_000481	1418	1438	-21.8	0.7171	ACUUGGGUUCUUAUUGAGUAU	|||||||xx||||||x|||||	UGAACCCUUGAAUAAAUCAUA	Bra012570	A03	-	23512909	23517511	4603	antisense
novel-m0135-3p	novel_circ_000481	1629	1649	-28.2	0.9126	AUCCUAAAUCCCAAAUCACAA	||x||||||||||||||xx||	UAUGAUUUAGGGUUUAGGAUU	Bra012570	A03	-	23512909	23517511	4603	antisense
novel-m0135-3p	novel_circ_000481	1650	1670	-28.2	0.9126	AUACUAAAUCCCAAAUCCCUA	||||||||||||||||||xx|	UAUGAUUUAGGGUUUAGGAUU	Bra012570	A03	-	23512909	23517511	4603	antisense
novel-m0135-3p	novel_circ_000481	1747	1767	-21.5	0.6958	AUCCUAAAUCCCAAAUUCCAA	||x|||||||||||||o|x||	UAUGAUUUAGGGUUUAGGAUU	Bra012570	A03	-	23512909	23517511	4603	antisense
novel-m0161-3p	novel_circ_000481	1656	1676	-23.7	0.7315	UCCCAAAUACUAAAUCCCAAA	||x|||||x||||||||||||	AGAGUUUAGGAUUUAGGGUUU	Bra012570	A03	-	23512909	23517511	4603	antisense
novel-m0161-3p	novel_circ_000481	1731	1751	-27	0.8464	UCCAAAAUUCUAAAUCACAAA	||xx||||o|||||||x||||	AGAGUUUAGGAUUUAGGGUUU	Bra012570	A03	-	23512909	23517511	4603	antisense
novel-m0161-3p	novel_circ_000481	1753	1773	-27	0.8491	UCCCAAAUCCUAAAUCCCAAA	||x||||||||||||||||||	AGAGUUUAGGAUUUAGGGUUU	Bra012570	A03	-	23512909	23517511	4603	antisense
novel-m0225-3p	novel_circ_000481	1656	1676	-23.7	0.7315	UCCCAAAUACUAAAUCCCAAA	||x|||||x||||||||||||	AGAGUUUAGGAUUUAGGGUUU	Bra012570	A03	-	23512909	23517511	4603	antisense
novel-m0225-3p	novel_circ_000481	1731	1751	-27	0.8464	UCCAAAAUUCUAAAUCACAAA	||xx||||o|||||||x||||	AGAGUUUAGGAUUUAGGGUUU	Bra012570	A03	-	23512909	23517511	4603	antisense
novel-m0225-3p	novel_circ_000481	1753	1773	-27	0.8491	UCCCAAAUCCUAAAUCCCAAA	||x||||||||||||||||||	AGAGUUUAGGAUUUAGGGUUU	Bra012570	A03	-	23512909	23517511	4603	antisense
novel-m0350-5p	novel_circ_000481	1418	1438	-31.7	0.9814	ACUUGGGUUCUUAUUGAGUAU	||||||||||||||||||||x	UGAACCCAAGAAUAACUCAUU	Bra012570	A03	-	23512909	23517511	4603	antisense
novel-m0362-5p	novel_circ_000481	1418	1438	-21.8	0.7171	ACUUGGGUUCUUAUUGAGUAU	|||||||xx||||||x|||||	UGAACCCUUGAAUAAAUCAUA	Bra012570	A03	-	23512909	23517511	4603	antisense
novel-m0370-5p	novel_circ_000481	1418	1438	-21.8	0.7171	ACUUGGGUUCUUAUUGAGUAU	|||||||xx||||||x|||||	UGAACCCUUGAAUAAAUCAUA	Bra012570	A03	-	23512909	23517511	4603	antisense
novel-m0392-3p	novel_circ_000481	1656	1676	-23.7	0.7315	UCCCAAAUACUAAAUCCCAAA	||x|||||x||||||||||||	AGAGUUUAGGAUUUAGGGUUU	Bra012570	A03	-	23512909	23517511	4603	antisense
novel-m0392-3p	novel_circ_000481	1731	1751	-27	0.8464	UCCAAAAUUCUAAAUCACAAA	||xx||||o|||||||x||||	AGAGUUUAGGAUUUAGGGUUU	Bra012570	A03	-	23512909	23517511	4603	antisense
novel-m0392-3p	novel_circ_000481	1753	1773	-27	0.8491	UCCCAAAUCCUAAAUCCCAAA	||x||||||||||||||||||	AGAGUUUAGGAUUUAGGGUUU	Bra012570	A03	-	23512909	23517511	4603	antisense
novel-m0399-3p	novel_circ_000481	1646	1666	-31.7	0.9814	UAAAUCCCAAAUCCCUAAUCC	||||||||||||||||||||x	AUUUAGGGUUUAGGGAUUAGA	Bra012570	A03	-	23512909	23517511	4603	antisense
novel-m0399-3p	novel_circ_000481	1743	1763	-21.4	0.6646	UAAAUCCCAAAUUCCAAAAUU	||||||||||||o||x||xo|	AUUUAGGGUUUAGGGAUUAGA	Bra012570	A03	-	23512909	23517511	4603	antisense
novel-m0420-5p	novel_circ_000481	1418	1438	-21.8	0.7171	ACUUGGGUUCUUAUUGAGUAU	|||||||xx||||||x|||||	UGAACCCUUGAAUAAAUCAUA	Bra012570	A03	-	23512909	23517511	4603	antisense
novel-m0483-5p	novel_circ_000481	1418	1438	-21.8	0.7171	ACUUGGGUUCUUAUUGAGUAU	|||||||xx||||||x|||||	UGAACCCUUGAAUAAAUCAUA	Bra012570	A03	-	23512909	23517511	4603	antisense
novel-m0583-5p	novel_circ_000481	1418	1438	-21.8	0.7171	ACUUGGGUUCUUAUUGAGUAU	|||||||xx||||||x|||||	UGAACCCUUGAAUAAAUCAUA	Bra012570	A03	-	23512909	23517511	4603	antisense
novel-m0611-5p	novel_circ_000481	1656	1676	-23.7	0.7315	UCCCAAAUACUAAAUCCCAAA	||x|||||x||||||||||||	AGAGUUUAGGAUUUAGGGUUU	Bra012570	A03	-	23512909	23517511	4603	antisense
novel-m0611-5p	novel_circ_000481	1731	1751	-27	0.8464	UCCAAAAUUCUAAAUCACAAA	||xx||||o|||||||x||||	AGAGUUUAGGAUUUAGGGUUU	Bra012570	A03	-	23512909	23517511	4603	antisense
novel-m0611-5p	novel_circ_000481	1753	1773	-27	0.8491	UCCCAAAUCCUAAAUCCCAAA	||x||||||||||||||||||	AGAGUUUAGGAUUUAGGGUUU	Bra012570	A03	-	23512909	23517511	4603	antisense
novel-m0635-5p	novel_circ_000481	1418	1438	-21.8	0.7171	ACUUGGGUUCUUAUUGAGUAU	|||||||xx||||||x|||||	UGAACCCUUGAAUAAAUCAUA	Bra012570	A03	-	23512909	23517511	4603	antisense
novel-m0676-5p	novel_circ_000481	1418	1438	-21.8	0.7171	ACUUGGGUUCUUAUUGAGUAU	|||||||xx||||||x|||||	UGAACCCUUGAAUAAAUCAUA	Bra012570	A03	-	23512909	23517511	4603	antisense
novel-m0694-5p	novel_circ_000481	1418	1438	-21.8	0.7171	ACUUGGGUUCUUAUUGAGUAU	|||||||xx||||||x|||||	UGAACCCUUGAAUAAAUCAUA	Bra012570	A03	-	23512909	23517511	4603	antisense
novel-m0760-3p	novel_circ_000481	1629	1650	-26.8	0.8508	AAUCCUAAAUCCCAAAUCACAA	||||||||||||x|||||||||	UUAGGAUUUAGGAUUUAGUGUU	Bra012570	A03	-	23512909	23517511	4603	antisense
novel-m0760-3p	novel_circ_000481	1754	1775	-23.4	0.7382	GUUCCCAAAUCCUAAAUCCCAA	ox|||x||||||||||||x|||	UUAGGAUUUAGGAUUUAGUGUU	Bra012570	A03	-	23512909	23517511	4603	antisense
novel-m0812-3p	novel_circ_000481	1646	1666	-31.7	0.9814	UAAAUCCCAAAUCCCUAAUCC	||||||||||||||||||||x	AUUUAGGGUUUAGGGAUUAGA	Bra012570	A03	-	23512909	23517511	4603	antisense
novel-m0812-3p	novel_circ_000481	1743	1763	-21.4	0.6646	UAAAUCCCAAAUUCCAAAAUU	||||||||||||o||x||xo|	AUUUAGGGUUUAGGGAUUAGA	Bra012570	A03	-	23512909	23517511	4603	antisense
novel-m0890-5p	novel_circ_000481	1418	1438	-21.8	0.7171	ACUUGGGUUCUUAUUGAGUAU	|||||||xx||||||x|||||	UGAACCCUUGAAUAAAUCAUA	Bra012570	A03	-	23512909	23517511	4603	antisense
novel-m0946-5p	novel_circ_000481	1418	1438	-21.8	0.7171	ACUUGGGUUCUUAUUGAGUAU	|||||||xx||||||x|||||	UGAACCCUUGAAUAAAUCAUA	Bra012570	A03	-	23512909	23517511	4603	antisense
miR2275-x	novel_circ_000483	12483	12500	-17.7	0.6344	AAGCCUUCUUUUCAUUUA	x|||||o||||||x||x|	AUCGGAGGAAAAGAAACU	Bra019410	A03	-	24353851	24376707	22615	exon_intron
miR3699-y	novel_circ_000483	22398	22415	-20	0.7407	AAUUGUUUUCUUUUUCAG	||o|||o||||||o|||o	UUGACAGAAGAAAGAGUU	Bra019410	A03	-	24353851	24376707	22615	exon_intron
miR9410-x	novel_circ_000483	14967	14987	-25.2	0.7925	GACUUAACAUUCAGCAGACCC	|||||||x|||||||||||xx	CUGAAUUAUAAGUCGUCUGUA	Bra019410	A03	-	24353851	24376707	22615	exon_intron
miR9410-x	novel_circ_000483	15357	15377	-24.1	0.7603	GAUUUUAUAUUCAGCAGACCA	||o||x|||||||||||||xx	CUGAAUUAUAAGUCGUCUGUA	Bra019410	A03	-	24353851	24376707	22615	exon_intron
novel-m0732-3p	novel_circ_000483	358	378	-23	0.7034	AAAAUAGAACACAACACUAAU	|||x|||||||||||||||x|	UUUGAUCUUGUGUUGUGAUGA	Bra019410	A03	-	24353851	24376707	22615	exon_intron
novel-m0845-5p	novel_circ_000483	17889	17909	-29.9	0.8329	UGAAGAUCUUUCAGAAGGUCU	|||||x|||||||||||||||	ACUUCGAGAAAGUCUUCCAGA	Bra019410	A03	-	24353851	24376707	22615	exon_intron
novel-m0845-5p	novel_circ_000483	17912	17932	-29.9	0.8329	UGAAGGUCCUUCAGAAGGUCU	|||||x||x||||||||||||	ACUUCGAGAAAGUCUUCCAGA	Bra019410	A03	-	24353851	24376707	22615	exon_intron
novel-m0845-5p	novel_circ_000483	17935	17955	-28.3	0.7883	UGAAGGUCCUUCAGAAGCUCU	|||||x||x||||||||x|||	ACUUCGAGAAAGUCUUCCAGA	Bra019410	A03	-	24353851	24376707	22615	exon_intron
novel-m0845-5p	novel_circ_000483	17981	18001	-27.5	0.766	UGAAGGUCCUUCAGAAGGUUU	|||||x||x||||||||||o|	ACUUCGAGAAAGUCUUCCAGA	Bra019410	A03	-	24353851	24376707	22615	exon_intron
novel-m0845-5p	novel_circ_000483	18004	18024	-25.4	0.7075	UGAAGAUCCUUCAGAAGGUCU	|||||x||x||||||||||||	ACUUCGAGAAAGUCUUCCAGA	Bra019410	A03	-	24353851	24376707	22615	exon_intron
novel-m0142-5p	novel_circ_000484	9580	9602	-33	0.8661	UGUCUCCUAUUGUAUACAAUUGC	||o||||o||||||||||||||x	ACGGAGGGUAACAUAUGUUAACA	Bra019411	A03	+	24371098	24386165	15068	exon_intron
miR2936-x	novel_circ_000485	5818	5838	-32.7	0.8114	UGCUCUCUCUCUUGUCUCCUU	x|||||||||||||||||xxo	UCGAGAGAGAGAACAGAGACG	Bra019410	A03	-	24371098	24386165	13177	exon_intron
novel-m0173-5p	novel_circ_000485	4530	4550	-22	0.7213	UUCCUAAGGUUUCGUUAACAA	|||||||||||x|o||x|||x	AAGGAUUCCAAUGUAAAUGUA	Bra019410	A03	-	24371098	24386165	13177	exon_intron
novel-m0732-3p	novel_circ_000485	1458	1478	-23.5	0.7187	AAAAUAGAACACAACACUGUU	|||x||||||||||||||oo|	UUUGAUCUUGUGUUGUGAUGA	Bra019410	A03	-	24371098	24386165	13177	exon_intron
novel-m0732-3p	novel_circ_000485	8167	8187	-23	0.7034	AAAAUAGAACACAACACUAAU	|||x|||||||||||||||x|	UUUGAUCUUGUGUUGUGAUGA	Bra019410	A03	-	24371098	24386165	13177	exon_intron
novel-m0142-5p	novel_circ_000486	5659	5681	-33	0.8661	UGUCUCCUAUUGUAUACAAUUGC	||o||||o||||||||||||||x	ACGGAGGGUAACAUAUGUUAACA	Bra019410	A03	+	24375019	24383195	8177	antisense
miR3699-y	novel_circ_000495	18955	18972	-18.8	0.6937	CACUGUCUUCUUUUACAU	x||||||||||||ox||x	UUGACAGAAGAAAGAGUU	Bra019293	A03	-	25194220	25219171	24952	antisense
miR5656-y	novel_circ_000495	18889	18906	-21.9	0.6518	CCACCUCAUCUCUGCACC	x|||x|||||||||xx||	AGUGAAGUAGAGACUGGG	Bra019293	A03	-	25194220	25219171	24952	antisense
miR7121-x	novel_circ_000495	311	328	-28.2	0.7944	GAGGAGAUCCACUUGGGC	|||||||x|||||||o|x	CUCCUCUUGGUGAACUCC	Bra019293	A03	-	25194220	25219171	24952	antisense
miR5261-y	novel_circ_000502	83179	83196	-22.5	0.6233	AACACCUACCGCAACUAA	|||||||||||x|||ox|	UUGUGGAUGGCCUUGGCU	Bra024117	A03	-	27499034	27588008	85255	exon_intron
miR5656-y	novel_circ_000502	65411	65428	-19.8	0.6018	UCAUUUCAUCUCUAACAC	|||o|||||||||x||x|	AGUGAAGUAGAGACUGGG	Bra024117	A03	-	27499034	27588008	85255	exon_intron
miR6219-y	novel_circ_000502	45732	45749	-20.3	0.6152	UAUCUGGGAUUUGGAUUU	o|||||||x||||||x|o	GUAGACCCGAAACCUUAG	Bra024117	A03	-	27499034	27588008	85255	exon_intron
miR8005-y	novel_circ_000502	45079	45102	-21	0.7292	AAAUUUUAAAUCCAAAAUCCCAAA	||||o||||||x|x|||||x||||	UUUAGAAUUUAAGAUUUAGAGUUU	Bra024117	A03	-	27499034	27588008	85255	exon_intron
miR858-x	novel_circ_000502	14409	14429	-23.1	0.6581	CAAGCAACAGACGAACUGUAA	x|||||||||||o|x|||x||	UUUCGUUGUCUGUUCGACCUU	Bra024117	A03	-	27499034	27588008	85255	exon_intron
novel-m0062-5p	novel_circ_000502	84320	84340	-19.7	0.648	AUUUAGGAACUUAUUUAGUUU	|o||x||||||||||||||x|	UGAACCCUUGAAUAAAUCAUA	Bra024117	A03	-	27499034	27588008	85255	exon_intron
novel-m0064-5p	novel_circ_000502	42384	42406	-25.9	0.7443	UUUUGUAUCUAGUAAAUCCUUGA	|x|||||o||||x|||||||||x	AUAACAUGGAUCUUUUAGGAACA	Bra024117	A03	-	27499034	27588008	85255	exon_intron
novel-m0071-5p	novel_circ_000502	84320	84340	-19.7	0.648	AUUUAGGAACUUAUUUAGUUU	|o||x||||||||||||||x|	UGAACCCUUGAAUAAAUCAUA	Bra024117	A03	-	27499034	27588008	85255	exon_intron
novel-m0135-3p	novel_circ_000502	45148	45168	-24.6	0.7987	AUCCUAUAUCCCAAACCCAAA	||x|||x||||||||x||x||	UAUGAUUUAGGGUUUAGGAUU	Bra024117	A03	-	27499034	27588008	85255	exon_intron
novel-m0135-3p	novel_circ_000502	84161	84181	-25	0.8091	AUACUAAAUCCCAAAUCACAA	|||||||||||||||||xx||	UAUGAUUUAGGGUUUAGGAUU	Bra024117	A03	-	27499034	27588008	85255	exon_intron
novel-m0161-3p	novel_circ_000502	45154	45174	-24.4	0.7508	UCCCAAAUCCUAUAUCCCAAA	||x|||||||||x||||||||	AGAGUUUAGGAUUUAGGGUUU	Bra024117	A03	-	27499034	27588008	85255	exon_intron
novel-m0161-3p	novel_circ_000502	84167	84187	-21.9	0.6759	UCUCUAAUACUAAAUCCCAAA	||||x|||x||||||||||||	AGAGUUUAGGAUUUAGGGUUU	Bra024117	A03	-	27499034	27588008	85255	exon_intron
novel-m0161-3p	novel_circ_000502	84188	84208	-21.9	0.6759	UCCCAAAGUCUAAAUCCCAAA	||x||||xo||||||||||||	AGAGUUUAGGAUUUAGGGUUU	Bra024117	A03	-	27499034	27588008	85255	exon_intron
novel-m0225-3p	novel_circ_000502	45154	45174	-24.4	0.7508	UCCCAAAUCCUAUAUCCCAAA	||x|||||||||x||||||||	AGAGUUUAGGAUUUAGGGUUU	Bra024117	A03	-	27499034	27588008	85255	exon_intron
novel-m0225-3p	novel_circ_000502	84167	84187	-21.9	0.6759	UCUCUAAUACUAAAUCCCAAA	||||x|||x||||||||||||	AGAGUUUAGGAUUUAGGGUUU	Bra024117	A03	-	27499034	27588008	85255	exon_intron
novel-m0225-3p	novel_circ_000502	84188	84208	-21.9	0.6759	UCCCAAAGUCUAAAUCCCAAA	||x||||xo||||||||||||	AGAGUUUAGGAUUUAGGGUUU	Bra024117	A03	-	27499034	27588008	85255	exon_intron
novel-m0240-3p	novel_circ_000502	14202	14222	-20.7	0.6765	AAUUCCUAUUGUAACUGAAAU	|||o||o||||||x||o||||	UUAGGGGUAACAUAGAUUUUA	Bra024117	A03	-	27499034	27588008	85255	exon_intron
novel-m0300-5p	novel_circ_000502	77519	77539	-27.9	0.6503	UAUCCUACCGAGUCUACUAUG	||||||x|||||x|o||||o|	AUAGGACGGCUCUGGUGAUGC	Bra024117	A03	-	27499034	27588008	85255	exon_intron
novel-m0332-5p	novel_circ_000502	45546	45566	-23.9	0.6408	AUUUAGGUUCAAGAUCUGGGA	||||x||||||xo||||||||	UAAACCCAAGUCUUAGACCCU	Bra024117	A03	-	27499034	27588008	85255	exon_intron
novel-m0362-5p	novel_circ_000502	84320	84340	-19.7	0.648	AUUUAGGAACUUAUUUAGUUU	|o||x||||||||||||||x|	UGAACCCUUGAAUAAAUCAUA	Bra024117	A03	-	27499034	27588008	85255	exon_intron
novel-m0370-5p	novel_circ_000502	84320	84340	-19.7	0.648	AUUUAGGAACUUAUUUAGUUU	|o||x||||||||||||||x|	UGAACCCUUGAAUAAAUCAUA	Bra024117	A03	-	27499034	27588008	85255	exon_intron
novel-m0392-3p	novel_circ_000502	45154	45174	-24.4	0.7508	UCCCAAAUCCUAUAUCCCAAA	||x|||||||||x||||||||	AGAGUUUAGGAUUUAGGGUUU	Bra024117	A03	-	27499034	27588008	85255	exon_intron
novel-m0392-3p	novel_circ_000502	84167	84187	-21.9	0.6759	UCUCUAAUACUAAAUCCCAAA	||||x|||x||||||||||||	AGAGUUUAGGAUUUAGGGUUU	Bra024117	A03	-	27499034	27588008	85255	exon_intron
novel-m0392-3p	novel_circ_000502	84188	84208	-21.9	0.6759	UCCCAAAGUCUAAAUCCCAAA	||x||||xo||||||||||||	AGAGUUUAGGAUUUAGGGUUU	Bra024117	A03	-	27499034	27588008	85255	exon_intron
novel-m0399-3p	novel_circ_000502	45076	45096	-21.6	0.6667	UAAAUCCAAAAUCCCAAAGCG	|||||||x|||||||x||x|x	AUUUAGGGUUUAGGGAUUAGA	Bra024117	A03	-	27499034	27588008	85255	exon_intron
novel-m0399-3p	novel_circ_000502	84157	84177	-25.6	0.7901	UAAAUCCCAAAUCACAAAACG	|||||||||||||x|x||x|x	AUUUAGGGUUUAGGGAUUAGA	Bra024117	A03	-	27499034	27588008	85255	exon_intron
novel-m0399-3p	novel_circ_000502	84178	84198	-25.6	0.7926	UAAAUCCCAAAUCUCUAAUAC	|||||||||||||o|||||xx	AUUUAGGGUUUAGGGAUUAGA	Bra024117	A03	-	27499034	27588008	85255	exon_intron
novel-m0405-3p	novel_circ_000502	14202	14222	-20.7	0.6765	AAUUCCUAUUGUAACUGAAAU	|||o||o||||||x||o||||	UUAGGGGUAACAUAGAUUUUA	Bra024117	A03	-	27499034	27588008	85255	exon_intron
novel-m0417-5p	novel_circ_000502	22853	22872	-22.3	0.6904	CUCUUUACCUCAGUACCUUU	||||||||||||x|||x|x|	GAGAAAUGGAGUAAUGAACA	Bra024117	A03	-	27499034	27588008	85255	exon_intron
novel-m0420-5p	novel_circ_000502	84320	84340	-19.7	0.648	AUUUAGGAACUUAUUUAGUUU	|o||x||||||||||||||x|	UGAACCCUUGAAUAAAUCAUA	Bra024117	A03	-	27499034	27588008	85255	exon_intron
novel-m0483-5p	novel_circ_000502	84320	84340	-19.7	0.648	AUUUAGGAACUUAUUUAGUUU	|o||x||||||||||||||x|	UGAACCCUUGAAUAAAUCAUA	Bra024117	A03	-	27499034	27588008	85255	exon_intron
novel-m0583-5p	novel_circ_000502	84320	84340	-19.7	0.648	AUUUAGGAACUUAUUUAGUUU	|o||x||||||||||||||x|	UGAACCCUUGAAUAAAUCAUA	Bra024117	A03	-	27499034	27588008	85255	exon_intron
novel-m0611-5p	novel_circ_000502	45154	45174	-24.4	0.7508	UCCCAAAUCCUAUAUCCCAAA	||x|||||||||x||||||||	AGAGUUUAGGAUUUAGGGUUU	Bra024117	A03	-	27499034	27588008	85255	exon_intron
novel-m0611-5p	novel_circ_000502	84167	84187	-21.9	0.6759	UCUCUAAUACUAAAUCCCAAA	||||x|||x||||||||||||	AGAGUUUAGGAUUUAGGGUUU	Bra024117	A03	-	27499034	27588008	85255	exon_intron
novel-m0611-5p	novel_circ_000502	84188	84208	-21.9	0.6759	UCCCAAAGUCUAAAUCCCAAA	||x||||xo||||||||||||	AGAGUUUAGGAUUUAGGGUUU	Bra024117	A03	-	27499034	27588008	85255	exon_intron
novel-m0632-3p	novel_circ_000502	42384	42406	-25.9	0.7443	UUUUGUAUCUAGUAAAUCCUUGA	|x|||||o||||x|||||||||x	AUAACAUGGAUCUUUUAGGAACA	Bra024117	A03	-	27499034	27588008	85255	exon_intron
novel-m0633-3p	novel_circ_000502	42384	42406	-25.9	0.7443	UUUUGUAUCUAGUAAAUCCUUGA	|x|||||o||||x|||||||||x	AUAACAUGGAUCUUUUAGGAACA	Bra024117	A03	-	27499034	27588008	85255	exon_intron
novel-m0635-5p	novel_circ_000502	84320	84340	-19.7	0.648	AUUUAGGAACUUAUUUAGUUU	|o||x||||||||||||||x|	UGAACCCUUGAAUAAAUCAUA	Bra024117	A03	-	27499034	27588008	85255	exon_intron
novel-m0676-5p	novel_circ_000502	84320	84340	-19.7	0.648	AUUUAGGAACUUAUUUAGUUU	|o||x||||||||||||||x|	UGAACCCUUGAAUAAAUCAUA	Bra024117	A03	-	27499034	27588008	85255	exon_intron
novel-m0686-5p	novel_circ_000502	45546	45566	-23.9	0.6408	AUUUAGGUUCAAGAUCUGGGA	||||x||||||xo||||||||	UAAACCCAAGUCUUAGACCCU	Bra024117	A03	-	27499034	27588008	85255	exon_intron
novel-m0694-5p	novel_circ_000502	84320	84340	-19.7	0.648	AUUUAGGAACUUAUUUAGUUU	|o||x||||||||||||||x|	UGAACCCUUGAAUAAAUCAUA	Bra024117	A03	-	27499034	27588008	85255	exon_intron
novel-m0729-5p	novel_circ_000502	45546	45566	-23.9	0.6408	AUUUAGGUUCAAGAUCUGGGA	||||x||||||xo||||||||	UAAACCCAAGUCUUAGACCCU	Bra024117	A03	-	27499034	27588008	85255	exon_intron
novel-m0750-5p	novel_circ_000502	22853	22872	-22.3	0.6904	CUCUUUACCUCAGUACCUUU	||||||||||||x|||x|x|	GAGAAAUGGAGUAAUGAACA	Bra024117	A03	-	27499034	27588008	85255	exon_intron
novel-m0754-5p	novel_circ_000502	84338	84358	-30.3	0.7809	UUUGGGAACCCAUUUGGCAUU	|||||||||||||||||x|o|	AAACCCUUGGGUAAACCCUGA	Bra024117	A03	-	27499034	27588008	85255	exon_intron
novel-m0760-3p	novel_circ_000502	84161	84182	-20.5	0.6508	AAUACUAAAUCCCAAAUCACAA	|||x||||||||x|||||||||	UUAGGAUUUAGGAUUUAGUGUU	Bra024117	A03	-	27499034	27588008	85255	exon_intron
novel-m0810-5p	novel_circ_000502	45546	45566	-23.9	0.6408	AUUUAGGUUCAAGAUCUGGGA	||||x||||||xo||||||||	UAAACCCAAGUCUUAGACCCU	Bra024117	A03	-	27499034	27588008	85255	exon_intron
novel-m0812-3p	novel_circ_000502	45076	45096	-21.6	0.6667	UAAAUCCAAAAUCCCAAAGCG	|||||||x|||||||x||x|x	AUUUAGGGUUUAGGGAUUAGA	Bra024117	A03	-	27499034	27588008	85255	exon_intron
novel-m0812-3p	novel_circ_000502	84157	84177	-25.6	0.7901	UAAAUCCCAAAUCACAAAACG	|||||||||||||x|x||x|x	AUUUAGGGUUUAGGGAUUAGA	Bra024117	A03	-	27499034	27588008	85255	exon_intron
novel-m0812-3p	novel_circ_000502	84178	84198	-25.6	0.7926	UAAAUCCCAAAUCUCUAAUAC	|||||||||||||o|||||xx	AUUUAGGGUUUAGGGAUUAGA	Bra024117	A03	-	27499034	27588008	85255	exon_intron
novel-m0868-5p	novel_circ_000502	22853	22872	-22.3	0.6904	CUCUUUACCUCAGUACCUUU	||||||||||||x|||x|x|	GAGAAAUGGAGUAAUGAACA	Bra024117	A03	-	27499034	27588008	85255	exon_intron
novel-m0890-5p	novel_circ_000502	84320	84340	-19.7	0.648	AUUUAGGAACUUAUUUAGUUU	|o||x||||||||||||||x|	UGAACCCUUGAAUAAAUCAUA	Bra024117	A03	-	27499034	27588008	85255	exon_intron
novel-m0946-5p	novel_circ_000502	84320	84340	-19.7	0.648	AUUUAGGAACUUAUUUAGUUU	|o||x||||||||||||||x|	UGAACCCUUGAAUAAAUCAUA	Bra024117	A03	-	27499034	27588008	85255	exon_intron
miR477-x	novel_circ_000513	222	241	-34.4	0.8452	UGAGGGGGGGUACCGAAGGA	||||o|||o||x|||||||x	ACUCUCCCUCAAGGCUUCCA	Bra017684	A03	+	29806583	29806834	252	antisense
miR5054-y	novel_circ_000514	73	90	-30.3	0.7337	AGGGGUGCUAGCGGCGGC	|||||||xo|||x||||x	UCCCCACAGUCGGCGCCA	Bra017734	A03	-	30159870	30160063	194	antisense
miR3699-y	novel_circ_000518	1789	1806	-17.4	0.6421	AAUUGUCUUCUAUCUACA	||o||||||||x|||xx|	UUGACAGAAGAAAGAGUU	Bra017773	A03	-	30405913	30410454	4542	exon_intron
miR11470-x	novel_circ_000526	2510	2528	-19.1	0.6388	AAAACCUUACUUUUAACUA	x||||||x|||oo||||||	CUUUGGAUUGAGGAUUGAU	Bra014399	A04	-	318696	321801	3005	exon_intron
novel-m0408-5p	novel_circ_000526	1082	1101	-22.3	0.6282	ACCAACCCAAGAACGUUCAG	|||||x||x|||||x|||||	UGGUUUGGAUCUUGGAAGUC	Bra014399	A04	-	318696	321801	3005	exon_intron
miR5149-y	novel_circ_000533	4115	4132	-20.5	0.6613	CUCGUCACUUCUAGCACC	||||x||||||||oxx||	GAGCUGUGAAGAUUUAGG	Bra014638	A04	-	1952257	1962980	10724	antisense
novel-m0135-3p	novel_circ_000533	5902	5922	-20.1	0.6547	AUACCAAAUCCCAAAUCAUAA	||||x||||||||||||x|||	UAUGAUUUAGGGUUUAGGAUU	Bra014638	A04	-	1952257	1962980	10724	antisense
novel-m0135-3p	novel_circ_000533	6237	6257	-19.2	0.6254	UUACCAAAUCCCAAAUUAUAA	x|||x|||||||||||ox|||	UAUGAUUUAGGGUUUAGGAUU	Bra014638	A04	-	1952257	1962980	10724	antisense
novel-m0135-3p	novel_circ_000533	6408	6428	-19.2	0.6254	UUACCAAAUCCCAAAUUAUAA	x|||x|||||||||||ox|||	UAUGAUUUAGGGUUUAGGAUU	Bra014638	A04	-	1952257	1962980	10724	antisense
novel-m0399-3p	novel_circ_000533	5898	5918	-19.9	0.6161	CAAAUCCCAAAUCAUAAAUCU	x||||||||||||xox|||||	AUUUAGGGUUUAGGGAUUAGA	Bra014638	A04	-	1952257	1962980	10724	antisense
novel-m0760-3p	novel_circ_000533	6258	6279	-21.7	0.6911	AAACCCAAAUCCUAAAUCACUU	||x||x||||||||||||||xx	UUAGGAUUUAGGAUUUAGUGUU	Bra014638	A04	-	1952257	1962980	10724	antisense
novel-m0760-3p	novel_circ_000533	6429	6450	-21.7	0.6911	AAACCCAAAUCCUAAAUCACUU	||x||x||||||||||||||xx	UUAGGAUUUAGGAUUUAGUGUU	Bra014638	A04	-	1952257	1962980	10724	antisense
novel-m0812-3p	novel_circ_000533	5898	5918	-19.9	0.6161	CAAAUCCCAAAUCAUAAAUCU	x||||||||||||xox|||||	AUUUAGGGUUUAGGGAUUAGA	Bra014638	A04	-	1952257	1962980	10724	antisense
novel-m0158-3p	novel_circ_000535	9788	9810	-23.4	0.6429	AACGCGCCUUACUUAUAAUAUAU	|||||||xo|||||x||||||||	UUGCGCGAGAUGAACAUUAUAUA	Bra014652	A04	+	2037098	2054141	15035	exon_intron
novel-m0460-3p	novel_circ_000535	9052	9074	-36.2	0.9784	UCUUACUAACACCACUACUGUAC	||||||||||||||||||||||x	AGAAUGAUUGUGGUGAUGACAUA	Bra014652	A04	+	2037098	2054141	15035	exon_intron
novel-m0584-5p	novel_circ_000535	9788	9810	-33.7	0.9208	AACGCGCCUUACUUAUAAUAUAU	||||||||o||||||||||||||	UUGCGCGGGAUGAAUAUUAUAUA	Bra014652	A04	+	2037098	2054141	15035	exon_intron
novel-m0693-3p	novel_circ_000535	9788	9810	-33.7	0.9208	AACGCGCCUUACUUAUAAUAUAU	||||||||o||||||||||||||	UUGCGCGGGAUGAAUAUUAUAUA	Bra014652	A04	+	2037098	2054141	15035	exon_intron
novel-m0738-3p	novel_circ_000535	9788	9810	-24.5	0.7081	AACGCGCCUUACUUAUAAUAUAU	||||x|||||||||x||||||||	UUGCACGGAAUGAACAUUAUAUA	Bra014652	A04	+	2037098	2054141	15035	exon_intron
miR1117-x	novel_circ_000537	14703	14720	-26.9	0.6862	AGGGCCGAGCACCUUUAU	||||||o||||||x|xx|	UCCCGGUUCGUGGCACCA	Bra014686	A04	-	2234482	2263790	29309	antisense
miR5021-x	novel_circ_000537	9969	9986	-18.8	0.6225	UCCUUCUCCUUCUUCUUU	ox|||||x|||||||||x	GAGAAGACGAAGAAGAAC	Bra014686	A04	-	2234482	2263790	29309	antisense
miR5021-x	novel_circ_000537	16492	16509	-21	0.6954	UCCUUCUCCUUCUUCUUG	ox|||||x||||||||||	GAGAAGACGAAGAAGAAC	Bra014686	A04	-	2234482	2263790	29309	antisense
novel-m0510-3p	novel_circ_000537	7386	7407	-23.4	0.7222	UAUACAAAUCUACCUGGUUGUU	||||x|||||||||||o|||xx	AUAUAUUUAGAUGGACUAACCU	Bra014686	A04	-	2234482	2263790	29309	antisense
novel-m0713-5p	novel_circ_000537	21525	21547	-39.8	0.9925	UAGGUACACUUGCUGCUUUCUGC	||||||||||||||||||||||x	AUCCAUGUGAACGACGAAAGACA	Bra014686	A04	-	2234482	2263790	29309	antisense
novel-m0727-5p	novel_circ_000537	11216	11236	-23.5	0.6772	AAAUGUCUCAGUUCAACUCAG	|||||||||||x|xx||||||	UUUACAGAGUCUACAUGAGUC	Bra014686	A04	-	2234482	2263790	29309	antisense
miR477-y	novel_circ_000539	7552	7573	-31.8	0.6477	ACUCCUGAAACUCCCUCCCACU	|||||x|||||o|||||x|||o	UGAGGCCUUUGGGGGAGAGUGG	Bra014744	A04	-	2749182	2759184	8970	exon_intron
miR5072-x	novel_circ_000539	177	194	-23.4	0.6174	AGUGGUCACUUCCGUGGA	||x|||||||||x|o||x	UCCCCAGUGAAGUCGCCA	Bra014744	A04	-	2749182	2759184	8970	exon_intron
miR1117-x	novel_circ_000540	411	428	-28.2	0.7194	CGGGUCAAGCACCUAGGU	x|||o||||||||xx|||	UCCCGGUUCGUGGCACCA	Bra014754	A04	-	2829149	2834432	5284	exon_intron
miR5021-x	novel_circ_000542	3311	3328	-19.9	0.6656	CUCUCCUUCUUCUUCUUG	||||x||x||||||||||	GAGAAGACGAAGAAGAAC	Bra039783	A04	+	3917687	3927127	9047	exon_intron
novel-m0869-5p	novel_circ_000542	719	741	-21.8	0.6246	AGCCUGGAAAAGUAAUUAAUUAU	|o|||||x|||||||||x|||||	UUGGACCCUUUCAUUAACUAAUA	Bra039783	A04	+	3917687	3927127	9047	exon_intron
miR5293-x	novel_circ_000560	227	246	-23.9	0.679	UUCUUGUUGUUCUUUCUUCU	|||||xoo||||o|||||||	AAGAAGGGCAAGGAAGAAGA	Bra025450	A04	-	9033891	9034329	439	antisense
miR5293-x	novel_circ_000561	375	394	-23.9	0.679	UUCUUGUUGUUCUUUCUUCU	|||||xoo||||o|||||||	AAGAAGGGCAAGGAAGAAGA	Bra025450	A04	-	9034069	9034477	409	antisense
novel-m0036-3p	novel_circ_000564	7063	7083	-38.7	1	ACUCUAUACCUCAACCCAACC	|||||||||||||||||||||	UGAGAUAUGGAGUUGGGUUGG	Bra032141	A04	+	10990604	11017670	27067	antisense
novel-m0198-5p	novel_circ_000564	7472	7494	-29.6	0.7014	ACUCUCAAUUGCACUCACGCUAU	||||||||||||||||xx|||x|	UGAGAGUUAACGUGAGCACGACA	Bra032141	A04	+	10990604	11017670	27067	antisense
novel-m0727-5p	novel_circ_000564	25409	25429	-30.1	0.8674	AAAUGUCUCAGUUGUACUCAG	|||||||||||x|||||||||	UUUACAGAGUCUACAUGAGUC	Bra032141	A04	+	10990604	11017670	27067	antisense
miR5021-x	novel_circ_000576	6904	6921	-21	0.6818	UCCUUUUGCUUCUUCUUC	ox|||o|||||||||||x	GAGAAGACGAAGAAGAAC	Bra021646	A04	+	13724309	13740017	15709	exon_intron
miR5656-y	novel_circ_000576	3183	3200	-24.6	0.73	CCACUACGUCUCUGAGCC	x||||x|o|||||||x||	AGUGAAGUAGAGACUGGG	Bra021646	A04	+	13724309	13740017	15709	exon_intron
novel-m0158-3p	novel_circ_000576	11737	11759	-31.3	0.8599	AGCGCGCCCUACUUGUAAUAUAU	|o|||||x|||||||||||||||	UUGCGCGAGAUGAACAUUAUAUA	Bra021646	A04	+	13724309	13740017	15709	exon_intron
novel-m0460-3p	novel_circ_000576	10921	10943	-36.2	0.9784	UCUUACUAACACCACUACUGUAC	||||||||||||||||||||||x	AGAAUGAUUGUGGUGAUGACAUA	Bra021646	A04	+	13724309	13740017	15709	exon_intron
novel-m0584-5p	novel_circ_000576	11737	11759	-36.3	0.9918	AGCGCGCCCUACUUGUAAUAUAU	|o||||||||||||o||||||||	UUGCGCGGGAUGAAUAUUAUAUA	Bra021646	A04	+	13724309	13740017	15709	exon_intron
novel-m0693-3p	novel_circ_000576	11737	11759	-36.3	0.9918	AGCGCGCCCUACUUGUAAUAUAU	|o||||||||||||o||||||||	UUGCGCGGGAUGAAUAUUAUAUA	Bra021646	A04	+	13724309	13740017	15709	exon_intron
novel-m0738-3p	novel_circ_000576	11737	11759	-25.9	0.7486	AGCGCGCCCUACUUGUAAUAUAU	|o||x|||x||||||||||||||	UUGCACGGAAUGAACAUUAUAUA	Bra021646	A04	+	13724309	13740017	15709	exon_intron
miR1134-y	novel_circ_000584	98	116	-25.4	0.8581	UCUGUGUUCUUCUUCUUCA	|xo|||||||||||||||x	AAGCACAAGAAGAAGAAGA	Bra021924	A04	-	15304218	15304403	186	antisense
novel-m0161-3p	novel_circ_000611	756	776	-21.5	0.6615	UUUCAAAUACUAAAUCACAAA	|o||||||x|||||||x||||	AGAGUUUAGGAUUUAGGGUUU	Bra004645	A05	+	1200419	1202306	1888	exon_intron
novel-m0161-3p	novel_circ_000611	878	898	-22.4	0.6892	UGAUAAAUCCUAAAUCUCAAA	|xxo||||||||||||o||||	AGAGUUUAGGAUUUAGGGUUU	Bra004645	A05	+	1200419	1202306	1888	exon_intron
novel-m0225-3p	novel_circ_000611	756	776	-21.5	0.6615	UUUCAAAUACUAAAUCACAAA	|o||||||x|||||||x||||	AGAGUUUAGGAUUUAGGGUUU	Bra004645	A05	+	1200419	1202306	1888	exon_intron
novel-m0225-3p	novel_circ_000611	878	898	-22.4	0.6892	UGAUAAAUCCUAAAUCUCAAA	|xxo||||||||||||o||||	AGAGUUUAGGAUUUAGGGUUU	Bra004645	A05	+	1200419	1202306	1888	exon_intron
novel-m0350-5p	novel_circ_000611	559	579	-26.1	0.808	ACUUGGGUUCUUUUUGAGAUA	||||||||||||x|||||xx|	UGAACCCAAGAAUAACUCAUU	Bra004645	A05	+	1200419	1202306	1888	exon_intron
novel-m0392-3p	novel_circ_000611	756	776	-21.5	0.6615	UUUCAAAUACUAAAUCACAAA	|o||||||x|||||||x||||	AGAGUUUAGGAUUUAGGGUUU	Bra004645	A05	+	1200419	1202306	1888	exon_intron
novel-m0392-3p	novel_circ_000611	878	898	-22.4	0.6892	UGAUAAAUCCUAAAUCUCAAA	|xxo||||||||||||o||||	AGAGUUUAGGAUUUAGGGUUU	Bra004645	A05	+	1200419	1202306	1888	exon_intron
novel-m0611-5p	novel_circ_000611	756	776	-21.5	0.6615	UUUCAAAUACUAAAUCACAAA	|o||||||x|||||||x||||	AGAGUUUAGGAUUUAGGGUUU	Bra004645	A05	+	1200419	1202306	1888	exon_intron
novel-m0611-5p	novel_circ_000611	878	898	-22.4	0.6892	UGAUAAAUCCUAAAUCUCAAA	|xxo||||||||||||o||||	AGAGUUUAGGAUUUAGGGUUU	Bra004645	A05	+	1200419	1202306	1888	exon_intron
novel-m0760-3p	novel_circ_000611	879	900	-20	0.6309	AAUGAUAAAUCCUAAAUCUCAA	|||xx|||||||||||||x|||	UUAGGAUUUAGGAUUUAGUGUU	Bra004645	A05	+	1200419	1202306	1888	exon_intron
miR10516-x	novel_circ_000614	7043	7061	-22	0.6044	UAGGAGACGUCUCCACACU	||||||||||||x|xx|||	AUCCUCUGCAGACGACUGA	Bra004748	A05	-	1630073	1681930	49137	exon_intron
miR5072-x	novel_circ_000614	27809	27826	-26.1	0.6887	GGAGGUCACUUUAGAGGU	o|x||||||||o||x|||	UCCCCAGUGAAGUCGCCA	Bra004748	A05	-	1630073	1681930	49137	exon_intron
miR5072-x	novel_circ_000614	27857	27874	-27.3	0.7203	GGAGGUCACUUUAGGGGU	o|x||||||||o||x|||	UCCCCAGUGAAGUCGCCA	Bra004748	A05	-	1630073	1681930	49137	exon_intron
miR5072-x	novel_circ_000614	28097	28114	-33.8	0.8918	GGAGGUCACUUCAGCGGA	o|x||||||||||||||x	UCCCCAGUGAAGUCGCCA	Bra004748	A05	-	1630073	1681930	49137	exon_intron
miR5072-x	novel_circ_000614	28337	28354	-28.2	0.7441	GGUGGUCACUUUAGGGGU	o|x||||||||o||x|||	UCCCCAGUGAAGUCGCCA	Bra004748	A05	-	1630073	1681930	49137	exon_intron
miR5072-x	novel_circ_000614	28529	28546	-28.1	0.7414	GGAGGUCACUUCAGAGGA	o|x|||||||||||x||x	UCCCCAGUGAAGUCGCCA	Bra004748	A05	-	1630073	1681930	49137	exon_intron
miR5072-x	novel_circ_000614	30216	30233	-29.9	0.7889	GGAGGUCACUUUAGUGGU	o|x||||||||o||o|||	UCCCCAGUGAAGUCGCCA	Bra004748	A05	-	1630073	1681930	49137	exon_intron
miR5072-x	novel_circ_000614	30974	30991	-28.1	0.7414	GGAGGUCACUUCAGAGGA	o|x|||||||||||x||x	UCCCCAGUGAAGUCGCCA	Bra004748	A05	-	1630073	1681930	49137	exon_intron
miR5072-x	novel_circ_000615	125	142	-29.9	0.7889	GGAGGUCACUUUAGUGGU	o|x||||||||o||o|||	UCCCCAGUGAAGUCGCCA	Bra004749	A05	-	1651627	1651839	213	antisense
miR1134-y	novel_circ_000644	4661	4679	-18.4	0.6216	UCCGGGUUCUUCUUCUAGU	|x||x|||||||||||xx|	AAGCACAAGAAGAAGAAGA	NA	A05	+	4604500	4609925	5426	intergenic
miR5021-x	novel_circ_000644	99	116	-21.3	0.7124	CUCUUCUUCUUCUUCUAC	|||||||x||||||||xx	GAGAAGACGAAGAAGAAC	NA	A05	+	4604500	4609925	5426	intergenic
miR5293-x	novel_circ_000647	1596	1615	-21.8	0.6089	UCCUUCCCUUUCCUUCAUCC	|x||||||x|||||||x||x	AAGAAGGGCAAGGAAGAAGA	Bra005457	A05	-	5586794	5592063	5270	antisense
novel-m0553-3p	novel_circ_000659	9246	9266	-28.5	0.7403	GUUGAGCUCUAGGUAGAAAAA	x|o||||||||||||||xx||	AAGCUCGAGAUCCAUCUGGUU	Bra018403	A05	+	7992435	8001935	9501	exon_intron
novel-m0605-3p	novel_circ_000659	9246	9266	-28.5	0.7403	GUUGAGCUCUAGGUAGAAAAA	x|o||||||||||||||xx||	AAGCUCGAGAUCCAUCUGGUU	Bra018403	A05	+	7992435	8001935	9501	exon_intron
miR5021-x	novel_circ_000662	998	1015	-18.6	0.6221	UCCUUCUUCUUCUUCUUA	ox|||||x|||||||||x	GAGAAGACGAAGAAGAAC	Bra037098	A05	+	9406441	9409351	2911	antisense
miR5021-x	novel_circ_000665	95	112	-19	0.6355	UUCUUCUUCUUCUCCUUU	o||||||x|||||x|||x	GAGAAGACGAAGAAGAAC	Bra021323	A05	+	9567853	9568018	166	antisense
miR1863-y	novel_circ_000668	31	54	-31.7	0.7847	GACCGAGAUUAUGGUACAAUCUCA	x|x|||||o|||||||||||||x|	AUCGCUCUGAUACCAUGUUAGAUU	NA	A05	+	10069392	10074529	5138	intergenic
miR3511-x	novel_circ_000669	2114	2131	-22.2	0.7735	GUCCGUUACUUACUUCUU	x||||x||||||||||||	AAGGCCAUGAAUGAAGAA	NA	A05	-	10069392	10074529	5138	intergenic
novel-m0135-3p	novel_circ_000681	158	178	-20	0.6472	AUUCCAAAUCCCAAAUCCCAA	||x|x|||||||||||||x||	UAUGAUUUAGGGUUUAGGAUU	NA	A05	+	16266240	16267457	1218	intergenic
novel-m0135-3p	novel_circ_000681	309	329	-18.7	0.6052	UUACCAAAUCCCAAAUCAUAA	x|||x||||||||||||x|||	UAUGAUUUAGGGUUUAGGAUU	NA	A05	+	16266240	16267457	1218	intergenic
novel-m0135-3p	novel_circ_000681	459	479	-21.1	0.6828	AUCCCAAAUCCCAAAUCAUAA	||x|x||||||||||||x|||	UAUGAUUUAGGGUUUAGGAUU	NA	A05	+	16266240	16267457	1218	intergenic
novel-m0399-3p	novel_circ_000681	161	181	-23.7	0.736	CAAAUUCCAAAUCCCAAAUCC	x||||o|||||||||x||||x	AUUUAGGGUUUAGGGAUUAGA	NA	A05	+	16266240	16267457	1218	intergenic
novel-m0399-3p	novel_circ_000681	462	482	-25.3	0.769	CUAAUCCCAAAUCCCAAAUCA	xx|||||||||||||x||||x	AUUUAGGGUUUAGGGAUUAGA	NA	A05	+	16266240	16267457	1218	intergenic
novel-m0760-3p	novel_circ_000681	452	473	-20.2	0.6372	AAUCCCAAAUCAUAAAUCCCCA	|||||x|||||x||||||x|x|	UUAGGAUUUAGGAUUUAGUGUU	NA	A05	+	16266240	16267457	1218	intergenic
novel-m0812-3p	novel_circ_000681	161	181	-23.7	0.736	CAAAUUCCAAAUCCCAAAUCC	x||||o|||||||||x||||x	AUUUAGGGUUUAGGGAUUAGA	NA	A05	+	16266240	16267457	1218	intergenic
novel-m0812-3p	novel_circ_000681	462	482	-25.3	0.769	CUAAUCCCAAAUCCCAAAUCA	xx|||||||||||||x||||x	AUUUAGGGUUUAGGGAUUAGA	NA	A05	+	16266240	16267457	1218	intergenic
miR6219-y	novel_circ_000682	1040	1057	-20.1	0.6091	GAUUUGGGAUUUGGAAUU	x||o||||x||||||||o	GUAGACCCGAAACCUUAG	NA	A05	-	16266240	16267457	1218	intergenic
novel-m0829-5p	novel_circ_000707	5107	5127	-25.6	0.7399	UGUUUUUAUCGUGAGUUUUUG	|||||||||||||||||ooox	ACAAAAAUAGCACUCAAGGGA	NA	A05	-	18960348	18967721	7374	intergenic
novel-m0026-5p	novel_circ_000708	4635	4656	-23.3	0.6068	ACUAAAAAACUACUCACUAUAA	|||||xx||||||||||||ox|	UGAUUGGUUGAUGAGUGAUGCU	Bra022290	A05	+	19311152	19318734	7583	antisense
miR11470-x	novel_circ_000710	3062	3080	-19.5	0.6522	UAAACCUUACUCCUAAAUA	x||||||x||||||||x||	CUUUGGAUUGAGGAUUGAU	Bra022233	A05	-	19626080	19639535	12568	exon_intron
miR11470-x	novel_circ_000710	10624	10642	-19.5	0.6522	UGAACCUCACUCCUAAGUA	xo|||||x||||||||x||	CUUUGGAUUGAGGAUUGAU	Bra022233	A05	-	19626080	19639535	12568	exon_intron
miR7533-y	novel_circ_000722	28	46	-26.5	0.7011	AACUCUUUCCUCUCUUCAA	xx|||o|||||||||||x|	GAGAGGAAGGAGAGAAGCU	Bra027209	A05	+	20441292	20441509	218	antisense
miR5021-x	novel_circ_000726	105	122	-19.9	0.6399	CUCUUCCUCUUCUUCUGC	||||||xx||||||||xx	GAGAAGACGAAGAAGAAC	Bra027283	A05	+	20826474	20826632	159	one_exon
miR5021-x	novel_circ_000744	2033	2050	-22.1	0.7391	UUCUUCUUCUUCUUCGAG	o||||||x|||||||xx|	GAGAAGACGAAGAAGAAC	Bra029718	A05	+	23256854	23259089	2236	antisense
miR5658-x	novel_circ_000744	910	929	-22.6	0.6975	CUACUACUACUACUACUACU	|||x||||||||||x|||||	GAUUAUGAUGAUGACGAUGA	Bra029718	A05	+	23256854	23259089	2236	antisense
miR5021-x	novel_circ_000745	4093	4110	-22.1	0.7391	UUCUUCUUCUUCUUCGAG	o||||||x|||||||xx|	GAGAAGACGAAGAAGAAC	Bra029717	A05	+	23259836	23266055	4761	exon_intron
miR5658-x	novel_circ_000745	2967	2986	-22.6	0.6975	CUACUACUACUACUACUACU	|||x||||||||||x|||||	GAUUAUGAUGAUGACGAUGA	Bra029717	A05	+	23259836	23266055	4761	exon_intron
miR472-y	novel_circ_000769	289	310	-28.4	0.644	AAAAGGGUUGAGGGGGGUAAGG	|||||||x|||||x|||||x||	UUUUCCCUACUCCACCCAUCCC	Bra018835	A06	+	1704172	1708911	4740	exon_intron
miR2275-x	novel_circ_000772	3437	3454	-20.7	0.7213	UAGGUUCCUUUUUUUUGA	|||xo|||||||o|||||	AUCGGAGGAAAAGAAACU	Bra018806	A06	-	1838105	1855480	12030	exon_intron
novel-m0853-3p	novel_circ_000772	3296	3316	-23.3	0.6657	UUAACAAUUAUUCAUCUCACC	|||||x|o||||||o|||||x	AAUUGGUGAUAAGUGGAGUGA	Bra018806	A06	-	1838105	1855480	12030	exon_intron
miR5721-x	novel_circ_000773	5545	5565	-26.9	0.7193	UGUUUACCUCACCCUUUAUGU	ox||||||||||||||||ox|	GAAAAUGGAGUGGGAAAUGGA	Bra018805	A06	+	1844450	1870581	24989	exon_intron
miR6164-y	novel_circ_000773	18011	18028	-22.9	0.7583	GUUUCACACUGCUUCCUC	o|||||||x|||o|||||	UAAAGUGUAACGGAGGAG	Bra018805	A06	+	1844450	1870581	24989	exon_intron
novel-m0084-5p	novel_circ_000773	11289	11309	-27.6	1	UUCCCUACAUCGAAAUUUUAA	|||||||||||o|||||||||	AAGGGAUGUAGUUUUAAAAUU	Bra018805	A06	+	1844450	1870581	24989	exon_intron
novel-m0135-3p	novel_circ_000781	899	919	-20.9	0.6764	AUGGUAAAUCCCAAAAUCUAA	||ox|||||||||||xo||||	UAUGAUUUAGGGUUUAGGAUU	Bra019874	A06	-	3934004	3939439	5436	exon_intron
novel-m0226-3p	novel_circ_000782	2223	2243	-28.1	0.7414	UUUUUGGGGCCGAUUCUCUGA	||o||||o|||||||x||||x	AAGAACCUCGGCUAAAAGACC	Bra019874	A06	+	3934004	3939439	5436	antisense
miR2275-x	novel_circ_000783	204	221	-19.5	0.6818	UUACCUCCUUUUCUUCUA	|xx||||||||||||xx|	AUCGGAGGAAAAGAAACU	Bra019865	A06	-	3972779	3978903	5870	exon_intron
miR5021-x	novel_circ_000784	3678	3695	-21	0.7023	UUUUUCUGCUUCUUCCUU	o|o||||||||||||x|x	GAGAAGACGAAGAAGAAC	Bra019866	A06	+	3972779	3978903	5684	exon_intron
miR2275-x	novel_circ_000785	215	232	-19.5	0.6818	UUACCUCCUUUUCUUCUA	|xx||||||||||||xx|	AUCGGAGGAAAAGAAACU	Bra019865	A06	-	3972864	3978914	5796	exon_intron
novel-m0964-5p	novel_circ_000800	898	918	-26.8	0.6458	AGCACCGGUGAAACGAUCUGA	|||||||x||||||xxx||||	UCGUGGCGACUUUGGACGACU	Bra019689	A06	+	4969794	4986298	14463	exon_intron
miR5021-x	novel_circ_000803	198	215	-20.4	0.6823	UUCGCCUGCUUCUUCUUC	o||xx||||||||||||x	GAGAAGACGAAGAAGAAC	Bra026192	A06	+	5370316	5370874	559	antisense
miR5072-x	novel_circ_000833	429	446	-23.1	0.6144	AGGGGCAACUUCAGGGUU	|||||xx|||||||x|x|	UCCCCAGUGAAGUCGCCA	Bra025911	A06	+	6751140	6751736	597	exon_intron
novel-m0036-3p	novel_circ_000842	3089	3109	-30.6	0.7907	ACUCUUUACCUCAUCCCAACC	|||||x|||||||x|||||||	UGAGAUAUGGAGUUGGGUUGG	Bra025805	A06	-	7803588	7808589	5002	intronic
novel-m0450-5p	novel_circ_000842	3189	3211	-31.6	0.8061	CAUUCCUUACGAGGUUGGGUUGA	|x|||||||||||o|||o|||o|	GCAAGGAAUGCUCUAACUCAAUU	Bra025805	A06	-	7803588	7808589	5002	intronic
miR1134-y	novel_circ_000856	23847	23865	-21.2	0.7138	UUCUUCUUCUUCUUCUUCU	|||x|x|||||||||||||	AAGCACAAGAAGAAGAAGA	Bra017969	A06	-	8862352	8891572	27244	exon_intron
miR5021-x	novel_circ_000856	23845	23862	-19.8	0.6556	UUCUUCUUCUUCUUCUAC	o||||||x||||||||xx	GAGAAGACGAAGAAGAAC	Bra017969	A06	-	8862352	8891572	27244	exon_intron
miR8594-x	novel_circ_000856	26510	26527	-18.6	0.6914	UACCUUCGCUCUUCGCUU	|||||xxo|||||||x||	AUGGAUAUGAGAAGCAAA	Bra017969	A06	-	8862352	8891572	27244	exon_intron
novel-m0460-3p	novel_circ_000856	1143	1165	-23.3	0.6297	UCUCACUAACACCACAACGGUGU	|||x|||||||||||x||x||o|	AGAAUGAUUGUGGUGAUGACAUA	Bra017969	A06	-	8862352	8891572	27244	exon_intron
novel-m0727-5p	novel_circ_000856	18095	18115	-23.9	0.6888	AAAUGUCUCAGACAUACUCAA	||||||||||||xx||||||x	UUUACAGAGUCUACAUGAGUC	Bra017969	A06	-	8862352	8891572	27244	exon_intron
miR2275-x	novel_circ_000857	9045	9062	-17.9	0.637	UGGGCUCCAUUUCUUUGU	|o|x||||x||||||||x	AUCGGAGGAAAAGAAACU	Bra017966	A06	+	8862352	8891572	28447	exon_intron
novel-m0713-3p	novel_circ_000857	8256	8275	-23.8	0.6899	UUAAAACGCAGAAACCAUGU	x||||||||||xx|||||||	UAUUUUGCGUCCGUGGUACA	Bra017966	A06	+	8862352	8891572	28447	exon_intron
novel-m0713-5p	novel_circ_000857	8315	8337	-25.8	0.6434	UAAGUACACUUGCUGUUUUAUGC	||x||||||||||||o|||x||x	AUCCAUGUGAACGACGAAAGACA	Bra017966	A06	+	8862352	8891572	28447	exon_intron
miR5021-x	novel_circ_000870	11742	11759	-22.1	0.7391	CUCUUCUCCUUCUUCUUC	|||||||x|||||||||x	GAGAAGACGAAGAAGAAC	Bra019416	A06	+	11410415	11499408	87976	exon_intron
miR5021-x	novel_circ_000870	68513	68530	-18.9	0.6279	CUCUUCUACUUCUUUUCA	|||||||x||||||o|xx	GAGAAGACGAAGAAGAAC	Bra019416	A06	+	11410415	11499408	87976	exon_intron
miR8594-x	novel_circ_000870	25591	25608	-16.9	0.6145	UACCAAUACUCUUCAAAU	||||x|||||||||xxx|	AUGGAUAUGAGAAGCAAA	Bra019416	A06	+	11410415	11499408	87976	exon_intron
novel-m0048-5p	novel_circ_000870	27348	27368	-26.2	0.7178	UCCCAAAUUUCAACUCUUCAC	||x|||||o|||||||o||||	AGAGUUUAGAGUUGAGGAGUG	Bra019416	A06	+	11410415	11499408	87976	exon_intron
novel-m0067-3p	novel_circ_000870	78736	78756	-18.2	0.6477	UAUAUAUACACAAAAAUCCUG	|x||||||||||x||x|||||	AAAUAUAUGUGUAUUAAGGAC	Bra019416	A06	+	11410415	11499408	87976	exon_intron
novel-m0117-3p	novel_circ_000870	27348	27368	-26.2	0.7178	UCCCAAAUUUCAACUCUUCAC	||x|||||o|||||||o||||	AGAGUUUAGAGUUGAGGAGUG	Bra019416	A06	+	11410415	11499408	87976	exon_intron
novel-m0135-3p	novel_circ_000870	27377	27397	-22.3	0.7217	AUCCCAAAUCCCAAAUCUCAA	||x|x||||||||||||ox||	UAUGAUUUAGGGUUUAGGAUU	Bra019416	A06	+	11410415	11499408	87976	exon_intron
novel-m0235-3p	novel_circ_000870	84703	84724	-25.1	0.7131	UUUUUAACUUUCGACUAAACCA	||x||x||||||||||||||||	AACAACUGAAAGCUGAUUUGGU	Bra019416	A06	+	11410415	11499408	87976	exon_intron
novel-m0270-5p	novel_circ_000870	27340	27362	-33.9	0.9137	AUUUCAACUCUUCACUCCAAAAC	||o|||||||||||||||||||x	UAGAGUUGAGAAGUGAGGUUUUA	Bra019416	A06	+	11410415	11499408	87976	exon_intron
novel-m0300-5p	novel_circ_000870	45127	45147	-29.1	0.6783	UAUACUGCCGAGUCUACUACG	|||x||||||||x|o||||||	AUAGGACGGCUCUGGUGAUGC	Bra019416	A06	+	11410415	11499408	87976	exon_intron
novel-m0399-3p	novel_circ_000870	27380	27400	-27.5	0.854	UAAAUCCCAAAUCCCAAAUCU	|||||||||||||||x|||||	AUUUAGGGUUUAGGGAUUAGA	Bra019416	A06	+	11410415	11499408	87976	exon_intron
novel-m0650-3p	novel_circ_000870	78736	78756	-18.2	0.6477	UAUAUAUACACAAAAAUCCUG	|x||||||||||x||x|||||	AAAUAUAUGUGUAUUAAGGAC	Bra019416	A06	+	11410415	11499408	87976	exon_intron
novel-m0673-3p	novel_circ_000870	27348	27368	-26.2	0.7178	UCCCAAAUUUCAACUCUUCAC	||x|||||o|||||||o||||	AGAGUUUAGAGUUGAGGAGUG	Bra019416	A06	+	11410415	11499408	87976	exon_intron
novel-m0727-5p	novel_circ_000870	18011	18031	-22	0.634	AAACGUCUUAGAUAUACUCAG	|||x||||o||||x|||||||	UUUACAGAGUCUACAUGAGUC	Bra019416	A06	+	11410415	11499408	87976	exon_intron
novel-m0760-3p	novel_circ_000870	27377	27398	-19.2	0.6057	AAUCCCAAAUCCCAAAUCUCAA	|||||x||||||x|||||x|||	UUAGGAUUUAGGAUUUAGUGUU	Bra019416	A06	+	11410415	11499408	87976	exon_intron
novel-m0766-3p	novel_circ_000870	27348	27368	-26.2	0.7178	UCCCAAAUUUCAACUCUUCAC	||x|||||o|||||||o||||	AGAGUUUAGAGUUGAGGAGUG	Bra019416	A06	+	11410415	11499408	87976	exon_intron
novel-m0812-3p	novel_circ_000870	27380	27400	-27.5	0.854	UAAAUCCCAAAUCCCAAAUCU	|||||||||||||||x|||||	AUUUAGGGUUUAGGGAUUAGA	Bra019416	A06	+	11410415	11499408	87976	exon_intron
novel-m0901-3p	novel_circ_000870	87718	87738	-32.5	0.7558	ACCUUGACUCUACGCGCUCAG	|||||||||||x||x||||||	UGGAACUGAGAGGCACGAGUC	Bra019416	A06	+	11410415	11499408	87976	exon_intron
miR5021-x	novel_circ_000872	23099	23116	-22.5	0.7525	UUCUUCUUCUUCUUCGUC	o||||||x|||||||x|x	GAGAAGACGAAGAAGAAC	Bra019435	A06	+	11701538	11726686	24848	exon_intron
miR5021-x	novel_circ_000872	24045	24062	-19.6	0.649	CAUUUCUGCUUCUUCAUU	|xo||||||||||||x|x	GAGAAGACGAAGAAGAAC	Bra019435	A06	+	11701538	11726686	24848	exon_intron
miR5021-x	novel_circ_000872	24185	24202	-20.4	0.6559	UUCUUCUUCUUCUUCUUU	o||||||x|||||||||x	GAGAAGACGAAGAAGAAC	Bra019435	A06	+	11701538	11726686	24848	exon_intron
novel-m0300-5p	novel_circ_000872	23331	23351	-38.3	0.8928	UAUCCUGCCGAGUCCACUACG	||||||||||||x||||||||	AUAGGACGGCUCUGGUGAUGC	Bra019435	A06	+	11701538	11726686	24848	exon_intron
novel-m0417-5p	novel_circ_000872	9560	9579	-20.8	0.6541	CACUUUACUUCAUUACUUUU	|x||||||o|||||||||x|	GAGAAAUGGAGUAAUGAACA	Bra019435	A06	+	11701538	11726686	24848	exon_intron
novel-m0750-5p	novel_circ_000872	9560	9579	-20.8	0.6541	CACUUUACUUCAUUACUUUU	|x||||||o|||||||||x|	GAGAAAUGGAGUAAUGAACA	Bra019435	A06	+	11701538	11726686	24848	exon_intron
novel-m0868-5p	novel_circ_000872	9560	9579	-20.8	0.6541	CACUUUACUUCAUUACUUUU	|x||||||o|||||||||x|	GAGAAAUGGAGUAAUGAACA	Bra019435	A06	+	11701538	11726686	24848	exon_intron
miR5021-x	novel_circ_000873	19490	19507	-22.5	0.7525	UUCUUCUUCUUCUUCGUC	o||||||x|||||||x|x	GAGAAGACGAAGAAGAAC	Bra019435	A06	+	11705147	11725634	20187	exon_intron
novel-m0300-5p	novel_circ_000873	19722	19742	-38.3	0.8928	UAUCCUGCCGAGUCCACUACG	||||||||||||x||||||||	AUAGGACGGCUCUGGUGAUGC	Bra019435	A06	+	11705147	11725634	20187	exon_intron
novel-m0417-5p	novel_circ_000873	5951	5970	-20.8	0.6541	CACUUUACUUCAUUACUUUU	|x||||||o|||||||||x|	GAGAAAUGGAGUAAUGAACA	Bra019435	A06	+	11705147	11725634	20187	exon_intron
novel-m0750-5p	novel_circ_000873	5951	5970	-20.8	0.6541	CACUUUACUUCAUUACUUUU	|x||||||o|||||||||x|	GAGAAAUGGAGUAAUGAACA	Bra019435	A06	+	11705147	11725634	20187	exon_intron
novel-m0868-5p	novel_circ_000873	5951	5970	-20.8	0.6541	CACUUUACUUCAUUACUUUU	|x||||||o|||||||||x|	GAGAAAUGGAGUAAUGAACA	Bra019435	A06	+	11705147	11725634	20187	exon_intron
miR1117-x	novel_circ_000918	53582	53599	-24.1	0.6195	AGGUUCAAGCACCUUGGU	|||xo||||||||x||||	UCCCGGUUCGUGGCACCA	Bra010138	A06	+	19434296	19523209	88516	exon_intron
miR12164-y	novel_circ_000918	62504	62521	-23.3	0.7169	CCUGAGGCUUACGGGUCC	xx||||||||||||x|x|	AAACUCCGAAUGCCGACG	Bra010138	A06	+	19434296	19523209	88516	exon_intron
miR6300-y	novel_circ_000918	3044	3061	-22.9	0.6815	CAGCAACAUCAUAUCACC	||x|x|||||||||||||	GUGGCUGUAGUAUAGUGG	Bra010138	A06	+	19434296	19523209	88516	exon_intron
miR8594-x	novel_circ_000918	1073	1090	-17.4	0.6468	UUCCUAUACUCUGCUGUU	|x||||||||||x|xx||	AUGGAUAUGAGAAGCAAA	Bra010138	A06	+	19434296	19523209	88516	exon_intron
miR8594-x	novel_circ_000918	55060	55077	-17.4	0.6468	UUCCUAUACUCUGCUGUU	|x||||||||||x|xx||	AUGGAUAUGAGAAGCAAA	Bra010138	A06	+	19434296	19523209	88516	exon_intron
novel-m0760-3p	novel_circ_000918	34407	34428	-28.6	0.9079	UAUCCUGAAUCCUAAAUCACUC	x|||||o|||||||||||||xx	UUAGGAUUUAGGAUUUAGUGUU	Bra010138	A06	+	19434296	19523209	88516	exon_intron
miR10516-x	novel_circ_000919	80258	80276	-26.5	0.726	UAGGAAACGUCUGCUGAAU	|||||x|||||||||||x|	AUCCUCUGCAGACGACUGA	Bra010149	A06	+	19760934	19848197	87146	exon_intron
miR2275-x	novel_circ_000919	83481	83498	-25.3	0.9068	UCGCCUCCUUUUCUUUGA	|x||||||||||||||||	AUCGGAGGAAAAGAAACU	Bra010149	A06	+	19760934	19848197	87146	exon_intron
miR3437-y	novel_circ_000919	84899	84917	-19.5	0.7303	UAGUCGCCUACAACGAAAA	|||o|o|||||||xo||||	AUCGGUGGAUGUUAUUUUU	Bra010149	A06	+	19760934	19848197	87146	exon_intron
miR4405-y	novel_circ_000919	81452	81469	-26.4	0.9263	UUGUUGGUUGAAUCUUGA	|||||||o||||||||||	AACAACCGACUUAGAACU	Bra010149	A06	+	19760934	19848197	87146	exon_intron
miR6300-y	novel_circ_000919	26279	26296	-21.5	0.6287	CCCCGACGUCAUACAACC	|x|||||o|||||xx|||	GUGGCUGUAGUAUAGUGG	Bra010149	A06	+	19760934	19848197	87146	exon_intron
miR8022-x	novel_circ_000919	82065	82083	-22.8	0.9913	GAGUUUACUCUUGAAACUC	o|o|||||||||||||||x	UUUAAAUGAGAACUUUGAA	Bra010149	A06	+	19760934	19848197	87146	exon_intron
novel-m0508-3p	novel_circ_000919	83527	83547	-52.1	1	CGCUGGGGUCCAGUCCGCCCU	|||||||||||||||||||||	GCGACCCCAGGUCAGGCGGGA	Bra010149	A06	+	19760934	19848197	87146	exon_intron
novel-m0516-3p	novel_circ_000919	81780	81801	-29.9	0.6765	UGCCAACCAUCUCGGACUGUGG	|||||||||||x|xo|||||x|	ACGGUUGGUAGCGGUUGACAGC	Bra010149	A06	+	19760934	19848197	87146	exon_intron
novel-m0657-3p	novel_circ_000919	81780	81801	-29.9	0.6765	UGCCAACCAUCUCGGACUGUGG	|||||||||||x|xo|||||x|	ACGGUUGGUAGCGGUUGACAGC	Bra010149	A06	+	19760934	19848197	87146	exon_intron
novel-m0733-5p	novel_circ_000919	48075	48096	-44.3	1	AACCGUCAAUCGGGAGAGAUCG	||||||||||||||||||||||	UUGGCAGUUAGCCCUCUCUAGC	Bra010149	A06	+	19760934	19848197	87146	exon_intron
miR4995-x	novel_circ_000920	61283	61301	-25.8	0.6632	CCGUCUCUGAACCACUUCU	|||||x|o||||||x|||o	GGCAGUGGCUUGGUUAAGG	Bra010149	A06	-	19760934	19848197	87264	antisense
miR10516-x	novel_circ_000921	80258	80276	-26.5	0.726	UAGGAAACGUCUGCUGAAU	|||||x|||||||||||x|	AUCCUCUGCAGACGACUGA	Bra010149	A06	+	19760934	19857277	96226	exon_intron
miR2275-x	novel_circ_000921	83481	83498	-25.3	0.9068	UCGCCUCCUUUUCUUUGA	|x||||||||||||||||	AUCGGAGGAAAAGAAACU	Bra010149	A06	+	19760934	19857277	96226	exon_intron
miR2275-x	novel_circ_000921	89423	89440	-25.3	0.9068	UCGCCUCCUUUUCUUUGG	|x|||||||||||||||o	AUCGGAGGAAAAGAAACU	Bra010149	A06	+	19760934	19857277	96226	exon_intron
miR3437-y	novel_circ_000921	84899	84917	-19.5	0.7303	UAGUCGCCUACAACGAAAA	|||o|o|||||||xo||||	AUCGGUGGAUGUUAUUUUU	Bra010149	A06	+	19760934	19857277	96226	exon_intron
miR3437-y	novel_circ_000921	93979	93997	-19.5	0.7303	UAGUCGCCUACAACGAAAA	|||o|o|||||||xo||||	AUCGGUGGAUGUUAUUUUU	Bra010149	A06	+	19760934	19857277	96226	exon_intron
miR4405-y	novel_circ_000921	81452	81469	-26.4	0.9263	UUGUUGGUUGAAUCUUGA	|||||||o||||||||||	AACAACCGACUUAGAACU	Bra010149	A06	+	19760934	19857277	96226	exon_intron
miR6300-y	novel_circ_000921	26279	26296	-21.5	0.6287	CCCCGACGUCAUACAACC	|x|||||o|||||xx|||	GUGGCUGUAGUAUAGUGG	Bra010149	A06	+	19760934	19857277	96226	exon_intron
miR8022-x	novel_circ_000921	82065	82083	-22.8	0.9913	GAGUUUACUCUUGAAACUC	o|o|||||||||||||||x	UUUAAAUGAGAACUUUGAA	Bra010149	A06	+	19760934	19857277	96226	exon_intron
novel-m0508-3p	novel_circ_000921	83527	83547	-52.1	1	CGCUGGGGUCCAGUCCGCCCU	|||||||||||||||||||||	GCGACCCCAGGUCAGGCGGGA	Bra010149	A06	+	19760934	19857277	96226	exon_intron
novel-m0516-3p	novel_circ_000921	81780	81801	-29.9	0.6765	UGCCAACCAUCUCGGACUGUGG	|||||||||||x|xo|||||x|	ACGGUUGGUAGCGGUUGACAGC	Bra010149	A06	+	19760934	19857277	96226	exon_intron
novel-m0657-3p	novel_circ_000921	81780	81801	-29.9	0.6765	UGCCAACCAUCUCGGACUGUGG	|||||||||||x|xo|||||x|	ACGGUUGGUAGCGGUUGACAGC	Bra010149	A06	+	19760934	19857277	96226	exon_intron
novel-m0733-5p	novel_circ_000921	48075	48096	-44.3	1	AACCGUCAAUCGGGAGAGAUCG	||||||||||||||||||||||	UUGGCAGUUAGCCCUCUCUAGC	Bra010149	A06	+	19760934	19857277	96226	exon_intron
miR4995-x	novel_circ_000922	70363	70381	-25.8	0.6632	CCGUCUCUGAACCACUUCU	|||||x|o||||||x|||o	GGCAGUGGCUUGGUUAAGG	Bra010149	A06	-	19760934	19857277	96344	antisense
miR4995-x	novel_circ_000923	70429	70447	-25.8	0.6632	CCGUCUCUGAACCACUUCU	|||||x|o||||||x|||o	GGCAGUGGCUUGGUUAAGG	Bra010149	A06	-	19760938	19857343	96406	antisense
miR4995-x	novel_circ_000924	61283	61301	-25.8	0.6632	CCGUCUCUGAACCACUUCU	|||||x|o||||||x|||o	GGCAGUGGCUUGGUUAAGG	Bra010149	A06	-	19785913	19848197	62285	antisense
miR4995-x	novel_circ_000925	70363	70381	-25.8	0.6632	CCGUCUCUGAACCACUUCU	|||||x|o||||||x|||o	GGCAGUGGCUUGGUUAAGG	Bra010149	A06	-	19785913	19857277	71365	antisense
miR10516-x	novel_circ_000926	55279	55297	-26.5	0.726	UAGGAAACGUCUGCUGAAU	|||||x|||||||||||x|	AUCCUCUGCAGACGACUGA	Bra010149	A06	+	19785913	19857277	71247	exon_intron
miR2275-x	novel_circ_000926	58502	58519	-25.3	0.9068	UCGCCUCCUUUUCUUUGA	|x||||||||||||||||	AUCGGAGGAAAAGAAACU	Bra010149	A06	+	19785913	19857277	71247	exon_intron
miR2275-x	novel_circ_000926	64444	64461	-25.3	0.9068	UCGCCUCCUUUUCUUUGG	|x|||||||||||||||o	AUCGGAGGAAAAGAAACU	Bra010149	A06	+	19785913	19857277	71247	exon_intron
miR3437-y	novel_circ_000926	59920	59938	-19.5	0.7303	UAGUCGCCUACAACGAAAA	|||o|o|||||||xo||||	AUCGGUGGAUGUUAUUUUU	Bra010149	A06	+	19785913	19857277	71247	exon_intron
miR3437-y	novel_circ_000926	69000	69018	-19.5	0.7303	UAGUCGCCUACAACGAAAA	|||o|o|||||||xo||||	AUCGGUGGAUGUUAUUUUU	Bra010149	A06	+	19785913	19857277	71247	exon_intron
miR4405-y	novel_circ_000926	56473	56490	-26.4	0.9263	UUGUUGGUUGAAUCUUGA	|||||||o||||||||||	AACAACCGACUUAGAACU	Bra010149	A06	+	19785913	19857277	71247	exon_intron
miR6300-y	novel_circ_000926	1300	1317	-21.5	0.6287	CCCCGACGUCAUACAACC	|x|||||o|||||xx|||	GUGGCUGUAGUAUAGUGG	Bra010149	A06	+	19785913	19857277	71247	exon_intron
miR8022-x	novel_circ_000926	57086	57104	-22.8	0.9913	GAGUUUACUCUUGAAACUC	o|o|||||||||||||||x	UUUAAAUGAGAACUUUGAA	Bra010149	A06	+	19785913	19857277	71247	exon_intron
novel-m0508-3p	novel_circ_000926	58548	58568	-52.1	1	CGCUGGGGUCCAGUCCGCCCU	|||||||||||||||||||||	GCGACCCCAGGUCAGGCGGGA	Bra010149	A06	+	19785913	19857277	71247	exon_intron
novel-m0516-3p	novel_circ_000926	56801	56822	-29.9	0.6765	UGCCAACCAUCUCGGACUGUGG	|||||||||||x|xo|||||x|	ACGGUUGGUAGCGGUUGACAGC	Bra010149	A06	+	19785913	19857277	71247	exon_intron
novel-m0657-3p	novel_circ_000926	56801	56822	-29.9	0.6765	UGCCAACCAUCUCGGACUGUGG	|||||||||||x|xo|||||x|	ACGGUUGGUAGCGGUUGACAGC	Bra010149	A06	+	19785913	19857277	71247	exon_intron
novel-m0733-5p	novel_circ_000926	23096	23117	-44.3	1	AACCGUCAAUCGGGAGAGAUCG	||||||||||||||||||||||	UUGGCAGUUAGCCCUCUCUAGC	Bra010149	A06	+	19785913	19857277	71247	exon_intron
miR10516-x	novel_circ_000927	55275	55293	-26.5	0.726	UAGGAAACGUCUGCUGAAU	|||||x|||||||||||x|	AUCCUCUGCAGACGACUGA	Bra010149	A06	+	19785917	19848242	62208	exon_intron
miR2275-x	novel_circ_000927	58498	58515	-25.3	0.9068	UCGCCUCCUUUUCUUUGA	|x||||||||||||||||	AUCGGAGGAAAAGAAACU	Bra010149	A06	+	19785917	19848242	62208	exon_intron
miR3437-y	novel_circ_000927	59916	59934	-19.5	0.7303	UAGUCGCCUACAACGAAAA	|||o|o|||||||xo||||	AUCGGUGGAUGUUAUUUUU	Bra010149	A06	+	19785917	19848242	62208	exon_intron
miR4405-y	novel_circ_000927	56469	56486	-26.4	0.9263	UUGUUGGUUGAAUCUUGA	|||||||o||||||||||	AACAACCGACUUAGAACU	Bra010149	A06	+	19785917	19848242	62208	exon_intron
miR6300-y	novel_circ_000927	1296	1313	-21.5	0.6287	CCCCGACGUCAUACAACC	|x|||||o|||||xx|||	GUGGCUGUAGUAUAGUGG	Bra010149	A06	+	19785917	19848242	62208	exon_intron
miR8022-x	novel_circ_000927	57082	57100	-22.8	0.9913	GAGUUUACUCUUGAAACUC	o|o|||||||||||||||x	UUUAAAUGAGAACUUUGAA	Bra010149	A06	+	19785917	19848242	62208	exon_intron
novel-m0508-3p	novel_circ_000927	58544	58564	-52.1	1	CGCUGGGGUCCAGUCCGCCCU	|||||||||||||||||||||	GCGACCCCAGGUCAGGCGGGA	Bra010149	A06	+	19785917	19848242	62208	exon_intron
novel-m0516-3p	novel_circ_000927	56797	56818	-29.9	0.6765	UGCCAACCAUCUCGGACUGUGG	|||||||||||x|xo|||||x|	ACGGUUGGUAGCGGUUGACAGC	Bra010149	A06	+	19785917	19848242	62208	exon_intron
novel-m0657-3p	novel_circ_000927	56797	56818	-29.9	0.6765	UGCCAACCAUCUCGGACUGUGG	|||||||||||x|xo|||||x|	ACGGUUGGUAGCGGUUGACAGC	Bra010149	A06	+	19785917	19848242	62208	exon_intron
novel-m0733-5p	novel_circ_000927	23092	23113	-44.3	1	AACCGUCAAUCGGGAGAGAUCG	||||||||||||||||||||||	UUGGCAGUUAGCCCUCUCUAGC	Bra010149	A06	+	19785917	19848242	62208	exon_intron
miR10516-x	novel_circ_000928	55274	55292	-26.5	0.726	UAGGAAACGUCUGCUGAAU	|||||x|||||||||||x|	AUCCUCUGCAGACGACUGA	Bra010149	A06	+	19785918	19848243	62208	exon_intron
miR2275-x	novel_circ_000928	58497	58514	-25.3	0.9068	UCGCCUCCUUUUCUUUGA	|x||||||||||||||||	AUCGGAGGAAAAGAAACU	Bra010149	A06	+	19785918	19848243	62208	exon_intron
miR3437-y	novel_circ_000928	59915	59933	-19.5	0.7303	UAGUCGCCUACAACGAAAA	|||o|o|||||||xo||||	AUCGGUGGAUGUUAUUUUU	Bra010149	A06	+	19785918	19848243	62208	exon_intron
miR4405-y	novel_circ_000928	56468	56485	-26.4	0.9263	UUGUUGGUUGAAUCUUGA	|||||||o||||||||||	AACAACCGACUUAGAACU	Bra010149	A06	+	19785918	19848243	62208	exon_intron
miR6300-y	novel_circ_000928	1295	1312	-21.5	0.6287	CCCCGACGUCAUACAACC	|x|||||o|||||xx|||	GUGGCUGUAGUAUAGUGG	Bra010149	A06	+	19785918	19848243	62208	exon_intron
miR8022-x	novel_circ_000928	57081	57099	-22.8	0.9913	GAGUUUACUCUUGAAACUC	o|o|||||||||||||||x	UUUAAAUGAGAACUUUGAA	Bra010149	A06	+	19785918	19848243	62208	exon_intron
novel-m0508-3p	novel_circ_000928	58543	58563	-52.1	1	CGCUGGGGUCCAGUCCGCCCU	|||||||||||||||||||||	GCGACCCCAGGUCAGGCGGGA	Bra010149	A06	+	19785918	19848243	62208	exon_intron
novel-m0516-3p	novel_circ_000928	56796	56817	-29.9	0.6765	UGCCAACCAUCUCGGACUGUGG	|||||||||||x|xo|||||x|	ACGGUUGGUAGCGGUUGACAGC	Bra010149	A06	+	19785918	19848243	62208	exon_intron
novel-m0657-3p	novel_circ_000928	56796	56817	-29.9	0.6765	UGCCAACCAUCUCGGACUGUGG	|||||||||||x|xo|||||x|	ACGGUUGGUAGCGGUUGACAGC	Bra010149	A06	+	19785918	19848243	62208	exon_intron
novel-m0733-5p	novel_circ_000928	23091	23112	-44.3	1	AACCGUCAAUCGGGAGAGAUCG	||||||||||||||||||||||	UUGGCAGUUAGCCCUCUCUAGC	Bra010149	A06	+	19785918	19848243	62208	exon_intron
miR10516-x	novel_circ_000929	55264	55282	-26.5	0.726	UAGGAAACGUCUGCUGAAU	|||||x|||||||||||x|	AUCCUCUGCAGACGACUGA	Bra010149	A06	+	19785928	19848222	62177	exon_intron
miR2275-x	novel_circ_000929	58487	58504	-25.3	0.9068	UCGCCUCCUUUUCUUUGA	|x||||||||||||||||	AUCGGAGGAAAAGAAACU	Bra010149	A06	+	19785928	19848222	62177	exon_intron
miR3437-y	novel_circ_000929	59905	59923	-19.5	0.7303	UAGUCGCCUACAACGAAAA	|||o|o|||||||xo||||	AUCGGUGGAUGUUAUUUUU	Bra010149	A06	+	19785928	19848222	62177	exon_intron
miR4405-y	novel_circ_000929	56458	56475	-26.4	0.9263	UUGUUGGUUGAAUCUUGA	|||||||o||||||||||	AACAACCGACUUAGAACU	Bra010149	A06	+	19785928	19848222	62177	exon_intron
miR6300-y	novel_circ_000929	1285	1302	-21.5	0.6287	CCCCGACGUCAUACAACC	|x|||||o|||||xx|||	GUGGCUGUAGUAUAGUGG	Bra010149	A06	+	19785928	19848222	62177	exon_intron
miR8022-x	novel_circ_000929	57071	57089	-22.8	0.9913	GAGUUUACUCUUGAAACUC	o|o|||||||||||||||x	UUUAAAUGAGAACUUUGAA	Bra010149	A06	+	19785928	19848222	62177	exon_intron
novel-m0508-3p	novel_circ_000929	58533	58553	-52.1	1	CGCUGGGGUCCAGUCCGCCCU	|||||||||||||||||||||	GCGACCCCAGGUCAGGCGGGA	Bra010149	A06	+	19785928	19848222	62177	exon_intron
novel-m0516-3p	novel_circ_000929	56786	56807	-29.9	0.6765	UGCCAACCAUCUCGGACUGUGG	|||||||||||x|xo|||||x|	ACGGUUGGUAGCGGUUGACAGC	Bra010149	A06	+	19785928	19848222	62177	exon_intron
novel-m0657-3p	novel_circ_000929	56786	56807	-29.9	0.6765	UGCCAACCAUCUCGGACUGUGG	|||||||||||x|xo|||||x|	ACGGUUGGUAGCGGUUGACAGC	Bra010149	A06	+	19785928	19848222	62177	exon_intron
novel-m0733-5p	novel_circ_000929	23081	23102	-44.3	1	AACCGUCAAUCGGGAGAGAUCG	||||||||||||||||||||||	UUGGCAGUUAGCCCUCUCUAGC	Bra010149	A06	+	19785928	19848222	62177	exon_intron
miR10516-x	novel_circ_000930	55264	55282	-26.5	0.726	UAGGAAACGUCUGCUGAAU	|||||x|||||||||||x|	AUCCUCUGCAGACGACUGA	Bra010149	A06	+	19785928	19857302	71257	exon_intron
miR2275-x	novel_circ_000930	58487	58504	-25.3	0.9068	UCGCCUCCUUUUCUUUGA	|x||||||||||||||||	AUCGGAGGAAAAGAAACU	Bra010149	A06	+	19785928	19857302	71257	exon_intron
miR2275-x	novel_circ_000930	64429	64446	-25.3	0.9068	UCGCCUCCUUUUCUUUGG	|x|||||||||||||||o	AUCGGAGGAAAAGAAACU	Bra010149	A06	+	19785928	19857302	71257	exon_intron
miR3437-y	novel_circ_000930	59905	59923	-19.5	0.7303	UAGUCGCCUACAACGAAAA	|||o|o|||||||xo||||	AUCGGUGGAUGUUAUUUUU	Bra010149	A06	+	19785928	19857302	71257	exon_intron
miR3437-y	novel_circ_000930	68985	69003	-19.5	0.7303	UAGUCGCCUACAACGAAAA	|||o|o|||||||xo||||	AUCGGUGGAUGUUAUUUUU	Bra010149	A06	+	19785928	19857302	71257	exon_intron
miR4405-y	novel_circ_000930	56458	56475	-26.4	0.9263	UUGUUGGUUGAAUCUUGA	|||||||o||||||||||	AACAACCGACUUAGAACU	Bra010149	A06	+	19785928	19857302	71257	exon_intron
miR6300-y	novel_circ_000930	1285	1302	-21.5	0.6287	CCCCGACGUCAUACAACC	|x|||||o|||||xx|||	GUGGCUGUAGUAUAGUGG	Bra010149	A06	+	19785928	19857302	71257	exon_intron
miR8022-x	novel_circ_000930	57071	57089	-22.8	0.9913	GAGUUUACUCUUGAAACUC	o|o|||||||||||||||x	UUUAAAUGAGAACUUUGAA	Bra010149	A06	+	19785928	19857302	71257	exon_intron
novel-m0508-3p	novel_circ_000930	58533	58553	-52.1	1	CGCUGGGGUCCAGUCCGCCCU	|||||||||||||||||||||	GCGACCCCAGGUCAGGCGGGA	Bra010149	A06	+	19785928	19857302	71257	exon_intron
novel-m0516-3p	novel_circ_000930	56786	56807	-29.9	0.6765	UGCCAACCAUCUCGGACUGUGG	|||||||||||x|xo|||||x|	ACGGUUGGUAGCGGUUGACAGC	Bra010149	A06	+	19785928	19857302	71257	exon_intron
novel-m0657-3p	novel_circ_000930	56786	56807	-29.9	0.6765	UGCCAACCAUCUCGGACUGUGG	|||||||||||x|xo|||||x|	ACGGUUGGUAGCGGUUGACAGC	Bra010149	A06	+	19785928	19857302	71257	exon_intron
novel-m0733-5p	novel_circ_000930	23081	23102	-44.3	1	AACCGUCAAUCGGGAGAGAUCG	||||||||||||||||||||||	UUGGCAGUUAGCCCUCUCUAGC	Bra010149	A06	+	19785928	19857302	71257	exon_intron
miR10516-x	novel_circ_000931	55256	55274	-26.5	0.726	UAGGAAACGUCUGCUGAAU	|||||x|||||||||||x|	AUCCUCUGCAGACGACUGA	Bra010149	A06	+	19785936	19857750	71697	exon_intron
miR2275-x	novel_circ_000931	58479	58496	-25.3	0.9068	UCGCCUCCUUUUCUUUGA	|x||||||||||||||||	AUCGGAGGAAAAGAAACU	Bra010149	A06	+	19785936	19857750	71697	exon_intron
miR2275-x	novel_circ_000931	64421	64438	-25.3	0.9068	UCGCCUCCUUUUCUUUGG	|x|||||||||||||||o	AUCGGAGGAAAAGAAACU	Bra010149	A06	+	19785936	19857750	71697	exon_intron
miR3437-y	novel_circ_000931	59897	59915	-19.5	0.7303	UAGUCGCCUACAACGAAAA	|||o|o|||||||xo||||	AUCGGUGGAUGUUAUUUUU	Bra010149	A06	+	19785936	19857750	71697	exon_intron
miR3437-y	novel_circ_000931	68977	68995	-19.5	0.7303	UAGUCGCCUACAACGAAAA	|||o|o|||||||xo||||	AUCGGUGGAUGUUAUUUUU	Bra010149	A06	+	19785936	19857750	71697	exon_intron
miR4405-y	novel_circ_000931	56450	56467	-26.4	0.9263	UUGUUGGUUGAAUCUUGA	|||||||o||||||||||	AACAACCGACUUAGAACU	Bra010149	A06	+	19785936	19857750	71697	exon_intron
miR6300-y	novel_circ_000931	1277	1294	-21.5	0.6287	CCCCGACGUCAUACAACC	|x|||||o|||||xx|||	GUGGCUGUAGUAUAGUGG	Bra010149	A06	+	19785936	19857750	71697	exon_intron
miR8022-x	novel_circ_000931	57063	57081	-22.8	0.9913	GAGUUUACUCUUGAAACUC	o|o|||||||||||||||x	UUUAAAUGAGAACUUUGAA	Bra010149	A06	+	19785936	19857750	71697	exon_intron
novel-m0508-3p	novel_circ_000931	58525	58545	-52.1	1	CGCUGGGGUCCAGUCCGCCCU	|||||||||||||||||||||	GCGACCCCAGGUCAGGCGGGA	Bra010149	A06	+	19785936	19857750	71697	exon_intron
novel-m0516-3p	novel_circ_000931	56778	56799	-29.9	0.6765	UGCCAACCAUCUCGGACUGUGG	|||||||||||x|xo|||||x|	ACGGUUGGUAGCGGUUGACAGC	Bra010149	A06	+	19785936	19857750	71697	exon_intron
novel-m0657-3p	novel_circ_000931	56778	56799	-29.9	0.6765	UGCCAACCAUCUCGGACUGUGG	|||||||||||x|xo|||||x|	ACGGUUGGUAGCGGUUGACAGC	Bra010149	A06	+	19785936	19857750	71697	exon_intron
novel-m0733-5p	novel_circ_000931	23073	23094	-44.3	1	AACCGUCAAUCGGGAGAGAUCG	||||||||||||||||||||||	UUGGCAGUUAGCCCUCUCUAGC	Bra010149	A06	+	19785936	19857750	71697	exon_intron
miR10516-x	novel_circ_000932	55256	55274	-26.5	0.726	UAGGAAACGUCUGCUGAAU	|||||x|||||||||||x|	AUCCUCUGCAGACGACUGA	Bra010149	A06	+	19785936	19858149	72096	exon_intron
miR2275-x	novel_circ_000932	58479	58496	-25.3	0.9068	UCGCCUCCUUUUCUUUGA	|x||||||||||||||||	AUCGGAGGAAAAGAAACU	Bra010149	A06	+	19785936	19858149	72096	exon_intron
miR2275-x	novel_circ_000932	64421	64438	-25.3	0.9068	UCGCCUCCUUUUCUUUGG	|x|||||||||||||||o	AUCGGAGGAAAAGAAACU	Bra010149	A06	+	19785936	19858149	72096	exon_intron
miR3437-y	novel_circ_000932	59897	59915	-19.5	0.7303	UAGUCGCCUACAACGAAAA	|||o|o|||||||xo||||	AUCGGUGGAUGUUAUUUUU	Bra010149	A06	+	19785936	19858149	72096	exon_intron
miR3437-y	novel_circ_000932	68977	68995	-19.5	0.7303	UAGUCGCCUACAACGAAAA	|||o|o|||||||xo||||	AUCGGUGGAUGUUAUUUUU	Bra010149	A06	+	19785936	19858149	72096	exon_intron
miR4405-y	novel_circ_000932	56450	56467	-26.4	0.9263	UUGUUGGUUGAAUCUUGA	|||||||o||||||||||	AACAACCGACUUAGAACU	Bra010149	A06	+	19785936	19858149	72096	exon_intron
miR6300-y	novel_circ_000932	1277	1294	-21.5	0.6287	CCCCGACGUCAUACAACC	|x|||||o|||||xx|||	GUGGCUGUAGUAUAGUGG	Bra010149	A06	+	19785936	19858149	72096	exon_intron
miR8022-x	novel_circ_000932	57063	57081	-22.8	0.9913	GAGUUUACUCUUGAAACUC	o|o|||||||||||||||x	UUUAAAUGAGAACUUUGAA	Bra010149	A06	+	19785936	19858149	72096	exon_intron
novel-m0508-3p	novel_circ_000932	58525	58545	-52.1	1	CGCUGGGGUCCAGUCCGCCCU	|||||||||||||||||||||	GCGACCCCAGGUCAGGCGGGA	Bra010149	A06	+	19785936	19858149	72096	exon_intron
novel-m0516-3p	novel_circ_000932	56778	56799	-29.9	0.6765	UGCCAACCAUCUCGGACUGUGG	|||||||||||x|xo|||||x|	ACGGUUGGUAGCGGUUGACAGC	Bra010149	A06	+	19785936	19858149	72096	exon_intron
novel-m0657-3p	novel_circ_000932	56778	56799	-29.9	0.6765	UGCCAACCAUCUCGGACUGUGG	|||||||||||x|xo|||||x|	ACGGUUGGUAGCGGUUGACAGC	Bra010149	A06	+	19785936	19858149	72096	exon_intron
novel-m0733-5p	novel_circ_000932	23073	23094	-44.3	1	AACCGUCAAUCGGGAGAGAUCG	||||||||||||||||||||||	UUGGCAGUUAGCCCUCUCUAGC	Bra010149	A06	+	19785936	19858149	72096	exon_intron
miR10516-x	novel_circ_000933	55256	55274	-26.5	0.726	UAGGAAACGUCUGCUGAAU	|||||x|||||||||||x|	AUCCUCUGCAGACGACUGA	Bra010149	A06	+	19785936	19858548	72495	exon_intron
miR2275-x	novel_circ_000933	58479	58496	-25.3	0.9068	UCGCCUCCUUUUCUUUGA	|x||||||||||||||||	AUCGGAGGAAAAGAAACU	Bra010149	A06	+	19785936	19858548	72495	exon_intron
miR2275-x	novel_circ_000933	64421	64438	-25.3	0.9068	UCGCCUCCUUUUCUUUGG	|x|||||||||||||||o	AUCGGAGGAAAAGAAACU	Bra010149	A06	+	19785936	19858548	72495	exon_intron
miR3437-y	novel_circ_000933	59897	59915	-19.5	0.7303	UAGUCGCCUACAACGAAAA	|||o|o|||||||xo||||	AUCGGUGGAUGUUAUUUUU	Bra010149	A06	+	19785936	19858548	72495	exon_intron
miR3437-y	novel_circ_000933	68977	68995	-19.5	0.7303	UAGUCGCCUACAACGAAAA	|||o|o|||||||xo||||	AUCGGUGGAUGUUAUUUUU	Bra010149	A06	+	19785936	19858548	72495	exon_intron
miR4405-y	novel_circ_000933	56450	56467	-26.4	0.9263	UUGUUGGUUGAAUCUUGA	|||||||o||||||||||	AACAACCGACUUAGAACU	Bra010149	A06	+	19785936	19858548	72495	exon_intron
miR6300-y	novel_circ_000933	1277	1294	-21.5	0.6287	CCCCGACGUCAUACAACC	|x|||||o|||||xx|||	GUGGCUGUAGUAUAGUGG	Bra010149	A06	+	19785936	19858548	72495	exon_intron
miR8022-x	novel_circ_000933	57063	57081	-22.8	0.9913	GAGUUUACUCUUGAAACUC	o|o|||||||||||||||x	UUUAAAUGAGAACUUUGAA	Bra010149	A06	+	19785936	19858548	72495	exon_intron
novel-m0508-3p	novel_circ_000933	58525	58545	-52.1	1	CGCUGGGGUCCAGUCCGCCCU	|||||||||||||||||||||	GCGACCCCAGGUCAGGCGGGA	Bra010149	A06	+	19785936	19858548	72495	exon_intron
novel-m0516-3p	novel_circ_000933	56778	56799	-29.9	0.6765	UGCCAACCAUCUCGGACUGUGG	|||||||||||x|xo|||||x|	ACGGUUGGUAGCGGUUGACAGC	Bra010149	A06	+	19785936	19858548	72495	exon_intron
novel-m0657-3p	novel_circ_000933	56778	56799	-29.9	0.6765	UGCCAACCAUCUCGGACUGUGG	|||||||||||x|xo|||||x|	ACGGUUGGUAGCGGUUGACAGC	Bra010149	A06	+	19785936	19858548	72495	exon_intron
novel-m0733-5p	novel_circ_000933	23073	23094	-44.3	1	AACCGUCAAUCGGGAGAGAUCG	||||||||||||||||||||||	UUGGCAGUUAGCCCUCUCUAGC	Bra010149	A06	+	19785936	19858548	72495	exon_intron
miR10516-x	novel_circ_000934	55256	55274	-26.5	0.726	UAGGAAACGUCUGCUGAAU	|||||x|||||||||||x|	AUCCUCUGCAGACGACUGA	Bra010149	A06	+	19785936	19858947	72894	exon_intron
miR2275-x	novel_circ_000934	58479	58496	-25.3	0.9068	UCGCCUCCUUUUCUUUGA	|x||||||||||||||||	AUCGGAGGAAAAGAAACU	Bra010149	A06	+	19785936	19858947	72894	exon_intron
miR2275-x	novel_circ_000934	64421	64438	-25.3	0.9068	UCGCCUCCUUUUCUUUGG	|x|||||||||||||||o	AUCGGAGGAAAAGAAACU	Bra010149	A06	+	19785936	19858947	72894	exon_intron
miR3437-y	novel_circ_000934	59897	59915	-19.5	0.7303	UAGUCGCCUACAACGAAAA	|||o|o|||||||xo||||	AUCGGUGGAUGUUAUUUUU	Bra010149	A06	+	19785936	19858947	72894	exon_intron
miR3437-y	novel_circ_000934	68977	68995	-19.5	0.7303	UAGUCGCCUACAACGAAAA	|||o|o|||||||xo||||	AUCGGUGGAUGUUAUUUUU	Bra010149	A06	+	19785936	19858947	72894	exon_intron
miR4405-y	novel_circ_000934	56450	56467	-26.4	0.9263	UUGUUGGUUGAAUCUUGA	|||||||o||||||||||	AACAACCGACUUAGAACU	Bra010149	A06	+	19785936	19858947	72894	exon_intron
miR6300-y	novel_circ_000934	1277	1294	-21.5	0.6287	CCCCGACGUCAUACAACC	|x|||||o|||||xx|||	GUGGCUGUAGUAUAGUGG	Bra010149	A06	+	19785936	19858947	72894	exon_intron
miR8022-x	novel_circ_000934	57063	57081	-22.8	0.9913	GAGUUUACUCUUGAAACUC	o|o|||||||||||||||x	UUUAAAUGAGAACUUUGAA	Bra010149	A06	+	19785936	19858947	72894	exon_intron
novel-m0508-3p	novel_circ_000934	58525	58545	-52.1	1	CGCUGGGGUCCAGUCCGCCCU	|||||||||||||||||||||	GCGACCCCAGGUCAGGCGGGA	Bra010149	A06	+	19785936	19858947	72894	exon_intron
novel-m0516-3p	novel_circ_000934	56778	56799	-29.9	0.6765	UGCCAACCAUCUCGGACUGUGG	|||||||||||x|xo|||||x|	ACGGUUGGUAGCGGUUGACAGC	Bra010149	A06	+	19785936	19858947	72894	exon_intron
novel-m0657-3p	novel_circ_000934	56778	56799	-29.9	0.6765	UGCCAACCAUCUCGGACUGUGG	|||||||||||x|xo|||||x|	ACGGUUGGUAGCGGUUGACAGC	Bra010149	A06	+	19785936	19858947	72894	exon_intron
novel-m0733-5p	novel_circ_000934	23073	23094	-44.3	1	AACCGUCAAUCGGGAGAGAUCG	||||||||||||||||||||||	UUGGCAGUUAGCCCUCUCUAGC	Bra010149	A06	+	19785936	19858947	72894	exon_intron
miR10516-x	novel_circ_000935	55256	55274	-26.5	0.726	UAGGAAACGUCUGCUGAAU	|||||x|||||||||||x|	AUCCUCUGCAGACGACUGA	Bra010149	A06	+	19785936	19859346	73293	exon_intron
miR2275-x	novel_circ_000935	58479	58496	-25.3	0.9068	UCGCCUCCUUUUCUUUGA	|x||||||||||||||||	AUCGGAGGAAAAGAAACU	Bra010149	A06	+	19785936	19859346	73293	exon_intron
miR2275-x	novel_circ_000935	64421	64438	-25.3	0.9068	UCGCCUCCUUUUCUUUGG	|x|||||||||||||||o	AUCGGAGGAAAAGAAACU	Bra010149	A06	+	19785936	19859346	73293	exon_intron
miR3437-y	novel_circ_000935	59897	59915	-19.5	0.7303	UAGUCGCCUACAACGAAAA	|||o|o|||||||xo||||	AUCGGUGGAUGUUAUUUUU	Bra010149	A06	+	19785936	19859346	73293	exon_intron
miR3437-y	novel_circ_000935	68977	68995	-19.5	0.7303	UAGUCGCCUACAACGAAAA	|||o|o|||||||xo||||	AUCGGUGGAUGUUAUUUUU	Bra010149	A06	+	19785936	19859346	73293	exon_intron
miR4405-y	novel_circ_000935	56450	56467	-26.4	0.9263	UUGUUGGUUGAAUCUUGA	|||||||o||||||||||	AACAACCGACUUAGAACU	Bra010149	A06	+	19785936	19859346	73293	exon_intron
miR6300-y	novel_circ_000935	1277	1294	-21.5	0.6287	CCCCGACGUCAUACAACC	|x|||||o|||||xx|||	GUGGCUGUAGUAUAGUGG	Bra010149	A06	+	19785936	19859346	73293	exon_intron
miR8022-x	novel_circ_000935	57063	57081	-22.8	0.9913	GAGUUUACUCUUGAAACUC	o|o|||||||||||||||x	UUUAAAUGAGAACUUUGAA	Bra010149	A06	+	19785936	19859346	73293	exon_intron
novel-m0508-3p	novel_circ_000935	58525	58545	-52.1	1	CGCUGGGGUCCAGUCCGCCCU	|||||||||||||||||||||	GCGACCCCAGGUCAGGCGGGA	Bra010149	A06	+	19785936	19859346	73293	exon_intron
novel-m0516-3p	novel_circ_000935	56778	56799	-29.9	0.6765	UGCCAACCAUCUCGGACUGUGG	|||||||||||x|xo|||||x|	ACGGUUGGUAGCGGUUGACAGC	Bra010149	A06	+	19785936	19859346	73293	exon_intron
novel-m0657-3p	novel_circ_000935	56778	56799	-29.9	0.6765	UGCCAACCAUCUCGGACUGUGG	|||||||||||x|xo|||||x|	ACGGUUGGUAGCGGUUGACAGC	Bra010149	A06	+	19785936	19859346	73293	exon_intron
novel-m0733-5p	novel_circ_000935	23073	23094	-44.3	1	AACCGUCAAUCGGGAGAGAUCG	||||||||||||||||||||||	UUGGCAGUUAGCCCUCUCUAGC	Bra010149	A06	+	19785936	19859346	73293	exon_intron
miR10516-x	novel_circ_000936	55256	55274	-26.5	0.726	UAGGAAACGUCUGCUGAAU	|||||x|||||||||||x|	AUCCUCUGCAGACGACUGA	Bra010149	A06	+	19785936	19859745	73692	exon_intron
miR2275-x	novel_circ_000936	58479	58496	-25.3	0.9068	UCGCCUCCUUUUCUUUGA	|x||||||||||||||||	AUCGGAGGAAAAGAAACU	Bra010149	A06	+	19785936	19859745	73692	exon_intron
miR2275-x	novel_circ_000936	64421	64438	-25.3	0.9068	UCGCCUCCUUUUCUUUGG	|x|||||||||||||||o	AUCGGAGGAAAAGAAACU	Bra010149	A06	+	19785936	19859745	73692	exon_intron
miR3437-y	novel_circ_000936	59897	59915	-19.5	0.7303	UAGUCGCCUACAACGAAAA	|||o|o|||||||xo||||	AUCGGUGGAUGUUAUUUUU	Bra010149	A06	+	19785936	19859745	73692	exon_intron
miR3437-y	novel_circ_000936	68977	68995	-19.5	0.7303	UAGUCGCCUACAACGAAAA	|||o|o|||||||xo||||	AUCGGUGGAUGUUAUUUUU	Bra010149	A06	+	19785936	19859745	73692	exon_intron
miR4405-y	novel_circ_000936	56450	56467	-26.4	0.9263	UUGUUGGUUGAAUCUUGA	|||||||o||||||||||	AACAACCGACUUAGAACU	Bra010149	A06	+	19785936	19859745	73692	exon_intron
miR6300-y	novel_circ_000936	1277	1294	-21.5	0.6287	CCCCGACGUCAUACAACC	|x|||||o|||||xx|||	GUGGCUGUAGUAUAGUGG	Bra010149	A06	+	19785936	19859745	73692	exon_intron
miR8022-x	novel_circ_000936	57063	57081	-22.8	0.9913	GAGUUUACUCUUGAAACUC	o|o|||||||||||||||x	UUUAAAUGAGAACUUUGAA	Bra010149	A06	+	19785936	19859745	73692	exon_intron
novel-m0508-3p	novel_circ_000936	58525	58545	-52.1	1	CGCUGGGGUCCAGUCCGCCCU	|||||||||||||||||||||	GCGACCCCAGGUCAGGCGGGA	Bra010149	A06	+	19785936	19859745	73692	exon_intron
novel-m0516-3p	novel_circ_000936	56778	56799	-29.9	0.6765	UGCCAACCAUCUCGGACUGUGG	|||||||||||x|xo|||||x|	ACGGUUGGUAGCGGUUGACAGC	Bra010149	A06	+	19785936	19859745	73692	exon_intron
novel-m0657-3p	novel_circ_000936	56778	56799	-29.9	0.6765	UGCCAACCAUCUCGGACUGUGG	|||||||||||x|xo|||||x|	ACGGUUGGUAGCGGUUGACAGC	Bra010149	A06	+	19785936	19859745	73692	exon_intron
novel-m0733-5p	novel_circ_000936	23073	23094	-44.3	1	AACCGUCAAUCGGGAGAGAUCG	||||||||||||||||||||||	UUGGCAGUUAGCCCUCUCUAGC	Bra010149	A06	+	19785936	19859745	73692	exon_intron
miR4995-x	novel_circ_000937	72831	72849	-25.8	0.6632	CCGUCUCUGAACCACUUCU	|||||x|o||||||x|||o	GGCAGUGGCUUGGUUAAGG	Bra010149	A06	-	19785936	19859745	73810	antisense
miR10516-x	novel_circ_000938	55256	55274	-26.5	0.726	UAGGAAACGUCUGCUGAAU	|||||x|||||||||||x|	AUCCUCUGCAGACGACUGA	Bra010149	A06	+	19785936	19860144	74091	exon_intron
miR2275-x	novel_circ_000938	58479	58496	-25.3	0.9068	UCGCCUCCUUUUCUUUGA	|x||||||||||||||||	AUCGGAGGAAAAGAAACU	Bra010149	A06	+	19785936	19860144	74091	exon_intron
miR2275-x	novel_circ_000938	64421	64438	-25.3	0.9068	UCGCCUCCUUUUCUUUGG	|x|||||||||||||||o	AUCGGAGGAAAAGAAACU	Bra010149	A06	+	19785936	19860144	74091	exon_intron
miR3437-y	novel_circ_000938	59897	59915	-19.5	0.7303	UAGUCGCCUACAACGAAAA	|||o|o|||||||xo||||	AUCGGUGGAUGUUAUUUUU	Bra010149	A06	+	19785936	19860144	74091	exon_intron
miR3437-y	novel_circ_000938	68977	68995	-19.5	0.7303	UAGUCGCCUACAACGAAAA	|||o|o|||||||xo||||	AUCGGUGGAUGUUAUUUUU	Bra010149	A06	+	19785936	19860144	74091	exon_intron
miR4405-y	novel_circ_000938	56450	56467	-26.4	0.9263	UUGUUGGUUGAAUCUUGA	|||||||o||||||||||	AACAACCGACUUAGAACU	Bra010149	A06	+	19785936	19860144	74091	exon_intron
miR6300-y	novel_circ_000938	1277	1294	-21.5	0.6287	CCCCGACGUCAUACAACC	|x|||||o|||||xx|||	GUGGCUGUAGUAUAGUGG	Bra010149	A06	+	19785936	19860144	74091	exon_intron
miR8022-x	novel_circ_000938	57063	57081	-22.8	0.9913	GAGUUUACUCUUGAAACUC	o|o|||||||||||||||x	UUUAAAUGAGAACUUUGAA	Bra010149	A06	+	19785936	19860144	74091	exon_intron
novel-m0508-3p	novel_circ_000938	58525	58545	-52.1	1	CGCUGGGGUCCAGUCCGCCCU	|||||||||||||||||||||	GCGACCCCAGGUCAGGCGGGA	Bra010149	A06	+	19785936	19860144	74091	exon_intron
novel-m0516-3p	novel_circ_000938	56778	56799	-29.9	0.6765	UGCCAACCAUCUCGGACUGUGG	|||||||||||x|xo|||||x|	ACGGUUGGUAGCGGUUGACAGC	Bra010149	A06	+	19785936	19860144	74091	exon_intron
novel-m0657-3p	novel_circ_000938	56778	56799	-29.9	0.6765	UGCCAACCAUCUCGGACUGUGG	|||||||||||x|xo|||||x|	ACGGUUGGUAGCGGUUGACAGC	Bra010149	A06	+	19785936	19860144	74091	exon_intron
novel-m0733-5p	novel_circ_000938	23073	23094	-44.3	1	AACCGUCAAUCGGGAGAGAUCG	||||||||||||||||||||||	UUGGCAGUUAGCCCUCUCUAGC	Bra010149	A06	+	19785936	19860144	74091	exon_intron
miR10516-x	novel_circ_000939	55254	55272	-26.5	0.726	UAGGAAACGUCUGCUGAAU	|||||x|||||||||||x|	AUCCUCUGCAGACGACUGA	Bra010149	A06	+	19785938	19848263	62208	exon_intron
miR2275-x	novel_circ_000939	58477	58494	-25.3	0.9068	UCGCCUCCUUUUCUUUGA	|x||||||||||||||||	AUCGGAGGAAAAGAAACU	Bra010149	A06	+	19785938	19848263	62208	exon_intron
miR3437-y	novel_circ_000939	59895	59913	-19.5	0.7303	UAGUCGCCUACAACGAAAA	|||o|o|||||||xo||||	AUCGGUGGAUGUUAUUUUU	Bra010149	A06	+	19785938	19848263	62208	exon_intron
miR4405-y	novel_circ_000939	56448	56465	-26.4	0.9263	UUGUUGGUUGAAUCUUGA	|||||||o||||||||||	AACAACCGACUUAGAACU	Bra010149	A06	+	19785938	19848263	62208	exon_intron
miR6300-y	novel_circ_000939	1275	1292	-21.5	0.6287	CCCCGACGUCAUACAACC	|x|||||o|||||xx|||	GUGGCUGUAGUAUAGUGG	Bra010149	A06	+	19785938	19848263	62208	exon_intron
miR8022-x	novel_circ_000939	57061	57079	-22.8	0.9913	GAGUUUACUCUUGAAACUC	o|o|||||||||||||||x	UUUAAAUGAGAACUUUGAA	Bra010149	A06	+	19785938	19848263	62208	exon_intron
novel-m0508-3p	novel_circ_000939	58523	58543	-52.1	1	CGCUGGGGUCCAGUCCGCCCU	|||||||||||||||||||||	GCGACCCCAGGUCAGGCGGGA	Bra010149	A06	+	19785938	19848263	62208	exon_intron
novel-m0516-3p	novel_circ_000939	56776	56797	-29.9	0.6765	UGCCAACCAUCUCGGACUGUGG	|||||||||||x|xo|||||x|	ACGGUUGGUAGCGGUUGACAGC	Bra010149	A06	+	19785938	19848263	62208	exon_intron
novel-m0657-3p	novel_circ_000939	56776	56797	-29.9	0.6765	UGCCAACCAUCUCGGACUGUGG	|||||||||||x|xo|||||x|	ACGGUUGGUAGCGGUUGACAGC	Bra010149	A06	+	19785938	19848263	62208	exon_intron
novel-m0733-5p	novel_circ_000939	23071	23092	-44.3	1	AACCGUCAAUCGGGAGAGAUCG	||||||||||||||||||||||	UUGGCAGUUAGCCCUCUCUAGC	Bra010149	A06	+	19785938	19848263	62208	exon_intron
miR4995-x	novel_circ_000940	6231	6249	-25.8	0.6632	CCGUCUCUGAACCACUUCU	|||||x|o||||||x|||o	GGCAGUGGCUUGGUUAAGG	NA	A06	-	19785944	19793145	7202	intergenic
miR10516-x	novel_circ_000941	55243	55261	-26.5	0.726	UAGGAAACGUCUGCUGAAU	|||||x|||||||||||x|	AUCCUCUGCAGACGACUGA	Bra010149	A06	+	19785949	19848222	62156	exon_intron
miR2275-x	novel_circ_000941	58466	58483	-25.3	0.9068	UCGCCUCCUUUUCUUUGA	|x||||||||||||||||	AUCGGAGGAAAAGAAACU	Bra010149	A06	+	19785949	19848222	62156	exon_intron
miR3437-y	novel_circ_000941	59884	59902	-19.5	0.7303	UAGUCGCCUACAACGAAAA	|||o|o|||||||xo||||	AUCGGUGGAUGUUAUUUUU	Bra010149	A06	+	19785949	19848222	62156	exon_intron
miR4405-y	novel_circ_000941	56437	56454	-26.4	0.9263	UUGUUGGUUGAAUCUUGA	|||||||o||||||||||	AACAACCGACUUAGAACU	Bra010149	A06	+	19785949	19848222	62156	exon_intron
miR6300-y	novel_circ_000941	1264	1281	-21.5	0.6287	CCCCGACGUCAUACAACC	|x|||||o|||||xx|||	GUGGCUGUAGUAUAGUGG	Bra010149	A06	+	19785949	19848222	62156	exon_intron
miR8022-x	novel_circ_000941	57050	57068	-22.8	0.9913	GAGUUUACUCUUGAAACUC	o|o|||||||||||||||x	UUUAAAUGAGAACUUUGAA	Bra010149	A06	+	19785949	19848222	62156	exon_intron
novel-m0508-3p	novel_circ_000941	58512	58532	-52.1	1	CGCUGGGGUCCAGUCCGCCCU	|||||||||||||||||||||	GCGACCCCAGGUCAGGCGGGA	Bra010149	A06	+	19785949	19848222	62156	exon_intron
novel-m0516-3p	novel_circ_000941	56765	56786	-29.9	0.6765	UGCCAACCAUCUCGGACUGUGG	|||||||||||x|xo|||||x|	ACGGUUGGUAGCGGUUGACAGC	Bra010149	A06	+	19785949	19848222	62156	exon_intron
novel-m0657-3p	novel_circ_000941	56765	56786	-29.9	0.6765	UGCCAACCAUCUCGGACUGUGG	|||||||||||x|xo|||||x|	ACGGUUGGUAGCGGUUGACAGC	Bra010149	A06	+	19785949	19848222	62156	exon_intron
novel-m0733-5p	novel_circ_000941	23060	23081	-44.3	1	AACCGUCAAUCGGGAGAGAUCG	||||||||||||||||||||||	UUGGCAGUUAGCCCUCUCUAGC	Bra010149	A06	+	19785949	19848222	62156	exon_intron
miR10516-x	novel_circ_000942	55243	55261	-26.5	0.726	UAGGAAACGUCUGCUGAAU	|||||x|||||||||||x|	AUCCUCUGCAGACGACUGA	Bra010149	A06	+	19785949	19857250	71184	exon_intron
miR2275-x	novel_circ_000942	58466	58483	-25.3	0.9068	UCGCCUCCUUUUCUUUGA	|x||||||||||||||||	AUCGGAGGAAAAGAAACU	Bra010149	A06	+	19785949	19857250	71184	exon_intron
miR2275-x	novel_circ_000942	64408	64425	-25.3	0.9068	UCGCCUCCUUUUCUUUGG	|x|||||||||||||||o	AUCGGAGGAAAAGAAACU	Bra010149	A06	+	19785949	19857250	71184	exon_intron
miR3437-y	novel_circ_000942	59884	59902	-19.5	0.7303	UAGUCGCCUACAACGAAAA	|||o|o|||||||xo||||	AUCGGUGGAUGUUAUUUUU	Bra010149	A06	+	19785949	19857250	71184	exon_intron
miR3437-y	novel_circ_000942	68964	68982	-19.5	0.7303	UAGUCGCCUACAACGAAAA	|||o|o|||||||xo||||	AUCGGUGGAUGUUAUUUUU	Bra010149	A06	+	19785949	19857250	71184	exon_intron
miR4405-y	novel_circ_000942	56437	56454	-26.4	0.9263	UUGUUGGUUGAAUCUUGA	|||||||o||||||||||	AACAACCGACUUAGAACU	Bra010149	A06	+	19785949	19857250	71184	exon_intron
miR6300-y	novel_circ_000942	1264	1281	-21.5	0.6287	CCCCGACGUCAUACAACC	|x|||||o|||||xx|||	GUGGCUGUAGUAUAGUGG	Bra010149	A06	+	19785949	19857250	71184	exon_intron
miR8022-x	novel_circ_000942	57050	57068	-22.8	0.9913	GAGUUUACUCUUGAAACUC	o|o|||||||||||||||x	UUUAAAUGAGAACUUUGAA	Bra010149	A06	+	19785949	19857250	71184	exon_intron
novel-m0508-3p	novel_circ_000942	58512	58532	-52.1	1	CGCUGGGGUCCAGUCCGCCCU	|||||||||||||||||||||	GCGACCCCAGGUCAGGCGGGA	Bra010149	A06	+	19785949	19857250	71184	exon_intron
novel-m0516-3p	novel_circ_000942	56765	56786	-29.9	0.6765	UGCCAACCAUCUCGGACUGUGG	|||||||||||x|xo|||||x|	ACGGUUGGUAGCGGUUGACAGC	Bra010149	A06	+	19785949	19857250	71184	exon_intron
novel-m0657-3p	novel_circ_000942	56765	56786	-29.9	0.6765	UGCCAACCAUCUCGGACUGUGG	|||||||||||x|xo|||||x|	ACGGUUGGUAGCGGUUGACAGC	Bra010149	A06	+	19785949	19857250	71184	exon_intron
novel-m0733-5p	novel_circ_000942	23060	23081	-44.3	1	AACCGUCAAUCGGGAGAGAUCG	||||||||||||||||||||||	UUGGCAGUUAGCCCUCUCUAGC	Bra010149	A06	+	19785949	19857250	71184	exon_intron
bra-miR319-5p	novel_circ_000946	23726	23746	-24.7	0.6432	UCUCGAAGGAACCCUGGAAGG	||||||||||||x|x||x|o|	AGAGCUUCCUUGAGUCCAUUC	NA	A06	+	19899138	19933196	34059	intergenic
miR10516-x	novel_circ_000946	5336	5354	-26.5	0.726	UAGGAAACGUCUGCUGAAU	|||||x|||||||||||x|	AUCCUCUGCAGACGACUGA	NA	A06	+	19899138	19933196	34059	intergenic
miR10516-x	novel_circ_000946	17556	17574	-26.5	0.726	UAGGAAACGUCUGCUGAAU	|||||x|||||||||||x|	AUCCUCUGCAGACGACUGA	NA	A06	+	19899138	19933196	34059	intergenic
miR10516-x	novel_circ_000946	30444	30462	-26.5	0.726	UAGGAAACGUCUGCUGAAU	|||||x|||||||||||x|	AUCCUCUGCAGACGACUGA	NA	A06	+	19899138	19933196	34059	intergenic
miR2275-x	novel_circ_000946	33708	33725	-25.3	0.9068	UCGCCUCCUUUUCUUUGA	|x||||||||||||||||	AUCGGAGGAAAAGAAACU	NA	A06	+	19899138	19933196	34059	intergenic
miR3437-y	novel_circ_000946	1411	1429	-19.5	0.7303	UAGUCGCCUACAACGAAAA	|||o|o|||||||xo||||	AUCGGUGGAUGUUAUUUUU	NA	A06	+	19899138	19933196	34059	intergenic
miR4405-y	novel_circ_000946	6476	6493	-19.9	0.7133	UUGUCAGCUGAGUCUUGA	||||xx|||||o||||||	AACAACCGACUUAGAACU	NA	A06	+	19899138	19933196	34059	intergenic
miR4405-y	novel_circ_000946	18749	18766	-21.6	0.7742	UUGUCGGUUGAGUCUUGA	||||x||o|||o||||||	AACAACCGACUUAGAACU	NA	A06	+	19899138	19933196	34059	intergenic
miR4405-y	novel_circ_000946	31637	31654	-21.6	0.7742	UUGUCGGUUGAGUCUUGA	||||x||o|||o||||||	AACAACCGACUUAGAACU	NA	A06	+	19899138	19933196	34059	intergenic
miR529-x	novel_circ_000946	18824	18841	-36.7	0.8929	CGCUCUCGCCUGGCGGAG	|||||||x||||||||||	GCGAGAGAGGACCGCCUC	NA	A06	+	19899138	19933196	34059	intergenic
miR529-x	novel_circ_000946	31712	31729	-36.7	0.8929	CGCUCUCGCCUGGCGGAG	|||||||x||||||||||	GCGAGAGAGGACCGCCUC	NA	A06	+	19899138	19933196	34059	intergenic
miR8022-x	novel_circ_000946	19375	19393	-23.1	1	AAGUUUACUCUUGAAACUU	||o||||||||||||||||	UUUAAAUGAGAACUUUGAA	NA	A06	+	19899138	19933196	34059	intergenic
miR8022-x	novel_circ_000946	32290	32308	-23.1	1	AAGUUUACUCUUGAAACUU	||o||||||||||||||||	UUUAAAUGAGAACUUUGAA	NA	A06	+	19899138	19933196	34059	intergenic
novel-m0508-3p	novel_circ_000946	33754	33774	-52.1	1	CGCUGGGGUCCAGUCCGCCCU	|||||||||||||||||||||	GCGACCCCAGGUCAGGCGGGA	NA	A06	+	19899138	19933196	34059	intergenic
novel-m0915-5p	novel_circ_000946	8603	8623	-27.1	0.7113	UCACCCCCUCUGAACAUCGUA	|||||||||||x|||||x|ox	AGUGGGGGAGAAUUGUAACGA	NA	A06	+	19899138	19933196	34059	intergenic
novel-m0981-5p	novel_circ_000946	8603	8623	-27.1	0.7113	UCACCCCCUCUGAACAUCGUA	|||||||||||x|||||x|ox	AGUGGGGGAGAAUUGUAACGA	NA	A06	+	19899138	19933196	34059	intergenic
miR5149-y	novel_circ_000947	14052	14069	-23.1	0.7333	CUCGAUACUUCUAAACGG	|||||o|||||||||xxx	GAGCUGUGAAGAUUUAGG	Bra037449	A06	+	20127430	20142230	14581	exon_intron
miR5149-y	novel_circ_000948	14272	14289	-23.1	0.7333	CUCGAUACUUCUAAACGG	|||||o|||||||||xxx	GAGCUGUGAAGAUUUAGG	Bra037452	A06	+	20127430	20173766	46337	exon_intron
miR5149-y	novel_circ_000948	34732	34749	-23.3	0.7304	CUCGAUACUUCUAAAACA	|||||o|||||||||x|x	GAGCUGUGAAGAUUUAGG	Bra037452	A06	+	20127430	20173766	46337	exon_intron
miR5149-y	novel_circ_000948	45808	45825	-23.1	0.7333	CUCGAUACUUCUAAACGG	|||||o|||||||||xxx	GAGCUGUGAAGAUUUAGG	Bra037452	A06	+	20127430	20173766	46337	exon_intron
miR5149-y	novel_circ_000949	13762	13779	-23.1	0.7333	CUCGAUACUUCUAAACGG	|||||o|||||||||xxx	GAGCUGUGAAGAUUUAGG	Bra037452	A06	+	20127940	20163277	35338	exon_intron
miR5149-y	novel_circ_000949	34222	34239	-23.3	0.7304	CUCGAUACUUCUAAAACA	|||||o|||||||||x|x	GAGCUGUGAAGAUUUAGG	Bra037452	A06	+	20127940	20163277	35338	exon_intron
novel-m0158-3p	novel_circ_000950	13223	13245	-31.6	0.8681	AACGCGCCCUACUUGUAAUAUAU	|||||||x|||||||||||||||	UUGCGCGAGAUGAACAUUAUAUA	Bra037451	A06	-	20127940	20163277	34674	exon_intron
novel-m0510-3p	novel_circ_000950	6652	6673	-27.9	0.8638	UAUAUAAAUCUACCUGGUUGAA	||||||||||||||||o|||x|	AUAUAUUUAGAUGGACUAACCU	Bra037451	A06	-	20127940	20163277	34674	exon_intron
novel-m0584-5p	novel_circ_000950	13223	13245	-36.6	1	AACGCGCCCUACUUGUAAUAUAU	||||||||||||||o||||||||	UUGCGCGGGAUGAAUAUUAUAUA	Bra037451	A06	-	20127940	20163277	34674	exon_intron
novel-m0693-3p	novel_circ_000950	13223	13245	-36.6	1	AACGCGCCCUACUUGUAAUAUAU	||||||||||||||o||||||||	UUGCGCGGGAUGAAUAUUAUAUA	Bra037451	A06	-	20127940	20163277	34674	exon_intron
novel-m0738-3p	novel_circ_000950	13223	13245	-26.2	0.7572	AACGCGCCCUACUUGUAAUAUAU	||||x|||x||||||||||||||	UUGCACGGAAUGAACAUUAUAUA	Bra037451	A06	-	20127940	20163277	34674	exon_intron
miR5149-y	novel_circ_000953	10367	10384	-23.1	0.7333	CUCGAUACUUCUAAACGG	|||||o|||||||||xxx	GAGCUGUGAAGAUUUAGG	Bra037449	A06	+	20131115	20146359	15025	exon_intron
miR5149-y	novel_circ_000954	10367	10384	-23.1	0.7333	CUCGAUACUUCUAAACGG	|||||o|||||||||xxx	GAGCUGUGAAGAUUUAGG	Bra037449	A06	+	20131115	20146535	15201	exon_intron
miR5149-y	novel_circ_000956	9946	9963	-23.1	0.7333	CUCGAUACUUCUAAACGG	|||||o|||||||||xxx	GAGCUGUGAAGAUUUAGG	Bra037449	A06	+	20131536	20146249	14494	exon_intron
miR5149-y	novel_circ_000958	9946	9963	-23.1	0.7333	CUCGAUACUUCUAAACGG	|||||o|||||||||xxx	GAGCUGUGAAGAUUUAGG	Bra037449	A06	+	20131536	20146425	14670	exon_intron
miR5149-y	novel_circ_000959	9887	9904	-23.1	0.7333	CUCGAUACUUCUAAACGG	|||||o|||||||||xxx	GAGCUGUGAAGAUUUAGG	Bra037449	A06	+	20131595	20146290	14476	exon_intron
miR5149-y	novel_circ_000961	9887	9904	-23.1	0.7333	CUCGAUACUUCUAAACGG	|||||o|||||||||xxx	GAGCUGUGAAGAUUUAGG	Bra037449	A06	+	20131595	20146466	14652	exon_intron
miR5149-y	novel_circ_000962	9887	9904	-23.1	0.7333	CUCGAUACUUCUAAACGG	|||||o|||||||||xxx	GAGCUGUGAAGAUUUAGG	Bra037449	A06	+	20131595	20146642	14828	exon_intron
miR5149-y	novel_circ_000964	9884	9901	-23.1	0.7333	CUCGAUACUUCUAAACGG	|||||o|||||||||xxx	GAGCUGUGAAGAUUUAGG	Bra037449	A06	+	20131598	20146310	14493	exon_intron
miR5149-y	novel_circ_000965	9884	9901	-23.1	0.7333	CUCGAUACUUCUAAACGG	|||||o|||||||||xxx	GAGCUGUGAAGAUUUAGG	Bra037449	A06	+	20131598	20146486	14669	exon_intron
miR5149-y	novel_circ_000966	9525	9542	-23.1	0.7333	CUCGAUACUUCUAAACGG	|||||o|||||||||xxx	GAGCUGUGAAGAUUUAGG	Bra037449	A06	+	20131957	20146310	14134	exon_intron
miR5149-y	novel_circ_000967	9525	9542	-23.1	0.7333	CUCGAUACUUCUAAACGG	|||||o|||||||||xxx	GAGCUGUGAAGAUUUAGG	Bra037449	A06	+	20131957	20146486	14310	exon_intron
miR5149-y	novel_circ_000968	9525	9542	-23.1	0.7333	CUCGAUACUUCUAAACGG	|||||o|||||||||xxx	GAGCUGUGAAGAUUUAGG	Bra037449	A06	+	20131957	20146662	14486	exon_intron
novel-m0158-3p	novel_circ_000972	13903	13925	-31.6	0.8681	AACGCGCCCUACUUGUAAUAUAU	|||||||x|||||||||||||||	UUGCGCGAGAUGAACAUUAUAUA	Bra037451	A06	-	20132279	20163957	31015	exon_intron
novel-m0510-3p	novel_circ_000972	7332	7353	-27.9	0.8638	UAUAUAAAUCUACCUGGUUGAA	||||||||||||||||o|||x|	AUAUAUUUAGAUGGACUAACCU	Bra037451	A06	-	20132279	20163957	31015	exon_intron
novel-m0584-5p	novel_circ_000972	13903	13925	-36.6	1	AACGCGCCCUACUUGUAAUAUAU	||||||||||||||o||||||||	UUGCGCGGGAUGAAUAUUAUAUA	Bra037451	A06	-	20132279	20163957	31015	exon_intron
novel-m0693-3p	novel_circ_000972	13903	13925	-36.6	1	AACGCGCCCUACUUGUAAUAUAU	||||||||||||||o||||||||	UUGCGCGGGAUGAAUAUUAUAUA	Bra037451	A06	-	20132279	20163957	31015	exon_intron
novel-m0738-3p	novel_circ_000972	13903	13925	-26.2	0.7572	AACGCGCCCUACUUGUAAUAUAU	||||x|||x||||||||||||||	UUGCACGGAAUGAACAUUAUAUA	Bra037451	A06	-	20132279	20163957	31015	exon_intron
miR5656-y	novel_circ_000979	7297	7314	-21.3	0.6474	UUACUUCACCUCUGACUU	|o||||||x|||||||oo	AGUGAAGUAGAGACUGGG	Bra025331	A06	+	21047447	21057776	9385	exon_intron
miR5658-x	novel_circ_000979	199	218	-21	0.6667	CUAGUUCUCCUAUUGCUACU	|||o|x||x|||o|||||||	GAUUAUGAUGAUGACGAUGA	Bra025331	A06	+	21047447	21057776	9385	exon_intron
miR8594-x	novel_circ_000979	4753	4770	-17.5	0.6481	UACUUAUACUCUUCUUCU	|||o||||||||||x|x|	AUGGAUAUGAGAAGCAAA	Bra025331	A06	+	21047447	21057776	9385	exon_intron
novel-m0399-3p	novel_circ_000979	6022	6042	-24.9	0.7685	UAGAUCCCAAAUCCACAAUCG	||o|||||||||||xx||||x	AUUUAGGGUUUAGGGAUUAGA	Bra025331	A06	+	21047447	21057776	9385	exon_intron
novel-m0805-5p	novel_circ_000979	9303	9323	-23.6	0.7108	UAGUUAGAAUACGAAGGGGUU	|||xo|o||||||||||x|||	AUCUGUUUUAUGCUUCCGCAA	Bra025331	A06	+	21047447	21057776	9385	exon_intron
novel-m0812-3p	novel_circ_000979	6022	6042	-24.9	0.7685	UAGAUCCCAAAUCCACAAUCG	||o|||||||||||xx||||x	AUUUAGGGUUUAGGGAUUAGA	Bra025331	A06	+	21047447	21057776	9385	exon_intron
novel-m0584-5p	novel_circ_000999	931	953	-24.7	0.6804	AAAACGCCCUACUUACAAUAUAU	||xx|||||||||||x|||||||	UUGCGCGGGAUGAAUAUUAUAUA	NA	A06	-	22961355	22962406	1052	intergenic
novel-m0693-3p	novel_circ_000999	931	953	-24.7	0.6804	AAAACGCCCUACUUACAAUAUAU	||xx|||||||||||x|||||||	UUGCGCGGGAUGAAUAUUAUAUA	NA	A06	-	22961355	22962406	1052	intergenic
miR3511-x	novel_circ_001012	3335	3352	-20.4	0.6962	UACCAGUACUUACUUCUU	|x||x|||||||||||||	AAGGCCAUGAAUGAAGAA	Bra033742	A06	-	24248759	24254708	5950	antisense
miR2275-x	novel_circ_001019	3421	3438	-19.8	0.6947	UAGCCUUCUUUUCGUGGA	||||||o||||||x|x||	AUCGGAGGAAAAGAAACU	Bra039009	A07	-	661033	665142	3527	exon_intron
miR5021-x	novel_circ_001025	37	54	-18	0.602	CUCUUCGGCUUCUCUUAG	||||||x||||||xo|x|	GAGAAGACGAAGAAGAAC	NA	A07	-	2264460	2265200	741	intergenic
miR5021-x	novel_circ_001040	126	143	-19	0.6355	UUCCUCUGCUUCUACUUU	o||x|||||||||x|||x	GAGAAGACGAAGAAGAAC	Bra015102	A07	+	5690607	5690786	180	antisense
miR5658-x	novel_circ_001040	92	111	-21.7	0.6718	CUGCUACUACUUCUGCUUCU	||ox|||||||x|||||x||	GAUUAUGAUGAUGACGAUGA	Bra015102	A07	+	5690607	5690786	180	antisense
miR5021-x	novel_circ_001044	167	184	-18.7	0.6213	UCCUUCUUCUUCUUCUUC	ox|||||x|||||||||x	GAGAAGACGAAGAAGAAC	Bra015013	A07	+	6503601	6503889	289	antisense
miR5021-x	novel_circ_001046	7104	7121	-19.2	0.6337	UUCUUCUUCUUUUUCUUG	o||||||x|||o||||||	GAGAAGACGAAGAAGAAC	Bra030169	A07	-	8197970	8206808	8839	antisense
novel-m0687-5p	novel_circ_001048	3685	3705	-29.4	0.8802	ACCUAUACUACUUUUCCGUAU	||||||||||||||x||||||	UGGAUAUGAUGAAAUGGCAUA	Bra030141	A07	-	8465621	8471486	5782	exon_intron
miR5293-x	novel_circ_001049	5161	5180	-28.2	0.7989	UUUCUUCCGUUCCUUCUUCU	||ox|o||||||||||||||	AAGAAGGGCAAGGAAGAAGA	Bra030140	A07	+	8465621	8471486	5866	exon_intron
miR7772-x	novel_circ_001060	56	73	-32	0.8672	AGCGCGAGGCACCUCUGG	|o|||x|||||||||||x	UUGCGGUCCGUGGAGACA	Bra012418	A07	-	10017441	10017649	209	antisense
miR5043-x	novel_circ_001061	5040	5057	-29	0.7073	AGGGGGAGGAGUCGAAGU	xo||||||||||||xx||	GUCCCCUCCUCAGCACCA	Bra012389	A07	-	10277010	10283093	5920	exon_intron
miR9410-x	novel_circ_001061	3221	3241	-22.3	0.7057	GACUUUACAUUCAGCAGACCC	|||||x|x|||||||||||xx	CUGAAUUAUAAGUCGUCUGUA	Bra012389	A07	-	10277010	10283093	5920	exon_intron
miR9410-x	novel_circ_001061	3354	3374	-31	0.9748	GACUUAAUAUUCAGCAGACAC	||||||||||||||||||||x	CUGAAUUAUAAGUCGUCUGUA	Bra012389	A07	-	10277010	10283093	5920	exon_intron
miR9410-x	novel_circ_001061	3579	3599	-31.8	1	GACUUAAUAUUCAGCAGACAU	|||||||||||||||||||||	CUGAAUUAUAAGUCGUCUGUA	Bra012389	A07	-	10277010	10283093	5920	exon_intron
miR9410-x	novel_circ_001061	3804	3824	-31	0.9748	GACUUAAUAUUCAGCAGACAC	||||||||||||||||||||x	CUGAAUUAUAAGUCGUCUGUA	Bra012389	A07	-	10277010	10283093	5920	exon_intron
miR9410-x	novel_circ_001061	4029	4049	-31.8	1	GACUUAAUAUUCAGCAGACAU	|||||||||||||||||||||	CUGAAUUAUAAGUCGUCUGUA	Bra012389	A07	-	10277010	10283093	5920	exon_intron
miR3699-y	novel_circ_001068	2087	2104	-20.3	0.7546	AGAAGUCUUCUUUCUCGA	|oxx||||||||||||o|	UUGACAGAAGAAAGAGUU	Bra012223	A07	-	11442153	11454645	12015	exon_intron
miR8594-x	novel_circ_001087	539	556	-17.4	0.6468	UACCUAUACUCUCCCUCU	||||||||||||x|x|x|	AUGGAUAUGAGAAGCAAA	Bra003185	A07	+	15007901	15014820	6920	exon_intron
novel-m0417-5p	novel_circ_001087	3257	3276	-23.2	0.7205	CUUUUUAUCUCACUACUUGU	||o||||o||||x|||||||	GAGAAAUGGAGUAAUGAACA	Bra003185	A07	+	15007901	15014820	6920	exon_intron
novel-m0417-5p	novel_circ_001087	3387	3406	-23.2	0.7205	CUUUUUAUCUCACUACUUGU	||o||||o||||x|||||||	GAGAAAUGGAGUAAUGAACA	Bra003185	A07	+	15007901	15014820	6920	exon_intron
novel-m0750-5p	novel_circ_001087	3257	3276	-23.2	0.7205	CUUUUUAUCUCACUACUUGU	||o||||o||||x|||||||	GAGAAAUGGAGUAAUGAACA	Bra003185	A07	+	15007901	15014820	6920	exon_intron
novel-m0750-5p	novel_circ_001087	3387	3406	-23.2	0.7205	CUUUUUAUCUCACUACUUGU	||o||||o||||x|||||||	GAGAAAUGGAGUAAUGAACA	Bra003185	A07	+	15007901	15014820	6920	exon_intron
novel-m0868-5p	novel_circ_001087	3257	3276	-23.2	0.7205	CUUUUUAUCUCACUACUUGU	||o||||o||||x|||||||	GAGAAAUGGAGUAAUGAACA	Bra003185	A07	+	15007901	15014820	6920	exon_intron
novel-m0868-5p	novel_circ_001087	3387	3406	-23.2	0.7205	CUUUUUAUCUCACUACUUGU	||o||||o||||x|||||||	GAGAAAUGGAGUAAUGAACA	Bra003185	A07	+	15007901	15014820	6920	exon_intron
miR5021-x	novel_circ_001088	209	226	-18	0.602	UUCUUCUCCUUCUUCAUU	o||||||x|||||||x|x	GAGAAGACGAAGAAGAAC	Bra003194	A07	+	15071150	15071418	269	one_exon
miR1134-y	novel_circ_001105	2514	2532	-19.3	0.6498	UUCGUCUUCUUCUCCUUCU	|||||x|||||||x|||||	AAGCACAAGAAGAAGAAGA	Bra003770	A07	+	18271991	18274774	2695	exon_intron
miR6300-y	novel_circ_001105	1807	1824	-22.6	0.6686	CACCGACAUCACUUCUUC	|||||||||||xx||xo|	GUGGCUGUAGUAUAGUGG	Bra003770	A07	+	18271991	18274774	2695	exon_intron
miR5021-x	novel_circ_001132	165	182	-18.3	0.612	UCCUUCUUCUUCUUCCUG	ox|||||x|||||||x||	GAGAAGACGAAGAAGAAC	Bra015779	A07	+	24176837	24177042	206	antisense
bra-miR319-5p	novel_circ_001140	266	286	-25.3	0.6589	UUUCGAAGGAACUCGAGUCAG	|o||||||||||||ox||x||	AGAGCUUCCUUGAGUCCAUUC	Bra015727	A07	-	24430771	24431067	297	one_exon
miR1863-y	novel_circ_001149	543	566	-29.3	0.727	GACCGAGACUAUGGUAUACUCUAA	x|x|||||||||||||o|x|||||	AUCGCUCUGAUACCAUGUUAGAUU	Bra035041	A07	-	25208512	25213911	5400	antisense
miR1863-y	novel_circ_001150	1086	1109	-29.3	0.727	GACCGAGACUAUGGUAUACUCUAA	x|x|||||||||||||o|x|||||	AUCGCUCUGAUACCAUGUUAGAUU	Bra035041	A07	-	25208512	25214454	5943	antisense
miR5021-x	novel_circ_001151	2447	2464	-19.8	0.6471	UUCUUCUACUUCUUCUUC	o||||||x|||||||||x	GAGAAGACGAAGAAGAAC	Bra035041	A07	+	25210651	25213960	3310	intronic
miR1863-y	novel_circ_001152	592	615	-29.3	0.727	GACCGAGACUAUGGUAUACUCUAA	x|x|||||||||||||o|x|||||	AUCGCUCUGAUACCAUGUUAGAUU	Bra035041	A07	-	25210651	25213960	3310	antisense
miR1863-y	novel_circ_001153	1135	1158	-29.3	0.727	GACCGAGACUAUGGUAUACUCUAA	x|x|||||||||||||o|x|||||	AUCGCUCUGAUACCAUGUUAGAUU	Bra035041	A07	-	25210651	25214503	3853	antisense
miR5021-x	novel_circ_001154	2447	2464	-19.8	0.6471	UUCUUCUACUUCUUCUUC	o||||||x|||||||||x	GAGAAGACGAAGAAGAAC	Bra035041	A07	+	25210651	25214503	3853	intronic
novel-m0521-3p	novel_circ_001157	4934	4953	-33.6	0.7119	GCCUCUUCUUCCCCUGCCCU	|x|||o||o||||||x||||	CAGAGGAGGAGGGGAGGGGA	Bra030891	A08	+	580263	604874	24612	exon_intron
novel-m0521-3p	novel_circ_001157	17911	17930	-33.6	0.7119	GCCUCUUCUUCCCCUGCCCU	|x|||o||o||||||x||||	CAGAGGAGGAGGGGAGGGGA	Bra030891	A08	+	580263	604874	24612	exon_intron
miR5021-x	novel_circ_001164	1880	1897	-18.3	0.606	UUCUUCUUCUUCUUCGUA	o||||||x|||||||x|x	GAGAAGACGAAGAAGAAC	Bra014110	A08	-	3369157	3403298	33318	exon_intron
novel-m0300-5p	novel_circ_001164	5998	6018	-38.3	0.8928	UAUCCUGCCGAGUCCACUACG	||||||||||||x||||||||	AUAGGACGGCUCUGGUGAUGC	Bra014110	A08	-	3369157	3403298	33318	exon_intron
novel-m0417-5p	novel_circ_001164	1386	1405	-23.2	0.7205	CUUUUUAUCUCACUACUUGU	||o||||o||||x|||||||	GAGAAAUGGAGUAAUGAACA	Bra014110	A08	-	3369157	3403298	33318	exon_intron
novel-m0573-5p	novel_circ_001164	31986	32006	-25	0.7463	AGGUUAUAUACGAAGAUAUUA	||||||o|||||x||||||||	UCCAAUGUAUGCCUCUAUAAU	Bra014110	A08	-	3369157	3403298	33318	exon_intron
novel-m0636-3p	novel_circ_001164	28806	28825	-22.4	0.6588	UAUCUCUAUAUGUAAUCUCU	|||||||x|||||||o|||x	AUAGAGACAUACAUUGGAGC	Bra014110	A08	-	3369157	3403298	33318	exon_intron
novel-m0713-5p	novel_circ_001164	26623	26645	-26.4	0.6701	UAAGUAUACUUGCUGAUUUCUGC	||x|||o||||||||x||||||x	AUCCAUGUGAACGACGAAAGACA	Bra014110	A08	-	3369157	3403298	33318	exon_intron
novel-m0750-5p	novel_circ_001164	1386	1405	-23.2	0.7205	CUUUUUAUCUCACUACUUGU	||o||||o||||x|||||||	GAGAAAUGGAGUAAUGAACA	Bra014110	A08	-	3369157	3403298	33318	exon_intron
novel-m0808-5p	novel_circ_001164	25519	25539	-35.2	0.9003	UUCUCUCAGGUGACACUCCAG	||||||x||||||||||||||	AAGAGAAUCCACUGUGAGGUC	Bra014110	A08	-	3369157	3403298	33318	exon_intron
novel-m0868-5p	novel_circ_001164	1386	1405	-23.2	0.7205	CUUUUUAUCUCACUACUUGU	||o||||o||||x|||||||	GAGAAAUGGAGUAAUGAACA	Bra014110	A08	-	3369157	3403298	33318	exon_intron
novel-m0360-3p	novel_circ_001167	8045	8065	-24.7	0.6804	GCGUCGCUGAAACUUUUCUUG	|||||||x|||xx||||||||	CGCAGCGUCUUGUAAAAGAAC	Bra013994	A08	+	4784879	4804479	19519	exon_intron
novel-m0536-3p	novel_circ_001167	8045	8065	-24.7	0.6804	GCGUCGCUGAAACUUUUCUUG	|||||||x|||xx||||||||	CGCAGCGUCUUGUAAAAGAAC	Bra013994	A08	+	4784879	4804479	19519	exon_intron
miR824-x	novel_circ_001174	586	604	-23.2	0.8169	AACUGGUAAACGUUCUUAA	|x|||||||||oo||||||	UAGACCAUUUGUGAGAAUU	NA	A08	-	8214779	8237644	22866	intergenic
miR824-x	novel_circ_001174	18090	18108	-23.2	0.8169	GACUGGUAAACGUUCUUAA	ox|||||||||oo||||||	UAGACCAUUUGUGAGAAUU	NA	A08	-	8214779	8237644	22866	intergenic
novel-m0026-5p	novel_circ_001174	1238	1259	-24.1	0.6227	AGUAACAAACUACUCACUCCGG	|x||||x|||||||||||x||o	UGAUUGGUUGAUGAGUGAUGCU	NA	A08	-	8214779	8237644	22866	intergenic
novel-m0026-5p	novel_circ_001174	18669	18690	-24	0.6218	AGUAACAAACUACUCACUCCGG	|x||||x|||||||||||x||o	UGAUUGGUUGAUGAGUGAUGCU	NA	A08	-	8214779	8237644	22866	intergenic
novel-m0047-5p	novel_circ_001174	209	230	-30.3	0.7445	AUAGUCCAUAAACUCAUGGUGU	|||o||||o||x||||o|||||	UAUUAGGUGUUGGAGUGCCACA	NA	A08	-	8214779	8237644	22866	intergenic
novel-m0047-5p	novel_circ_001174	12193	12214	-36.9	0.9066	AUAGUCCAUAACCUCAUGGUGU	|||o||||o|||||||o|||||	UAUUAGGUGUUGGAGUGCCACA	NA	A08	-	8214779	8237644	22866	intergenic
novel-m0047-5p	novel_circ_001174	17728	17749	-30.3	0.7445	AUAGUCCAUAAACUCAUGGUGU	|||o||||o||x||||o|||||	UAUUAGGUGUUGGAGUGCCACA	NA	A08	-	8214779	8237644	22866	intergenic
novel-m0312-5p	novel_circ_001174	209	230	-30.3	0.7445	AUAGUCCAUAAACUCAUGGUGU	|||o||||o||x||||o|||||	UAUUAGGUGUUGGAGUGCCACA	NA	A08	-	8214779	8237644	22866	intergenic
novel-m0312-5p	novel_circ_001174	12193	12214	-36.9	0.9066	AUAGUCCAUAACCUCAUGGUGU	|||o||||o|||||||o|||||	UAUUAGGUGUUGGAGUGCCACA	NA	A08	-	8214779	8237644	22866	intergenic
novel-m0312-5p	novel_circ_001174	17728	17749	-30.3	0.7445	AUAGUCCAUAAACUCAUGGUGU	|||o||||o||x||||o|||||	UAUUAGGUGUUGGAGUGCCACA	NA	A08	-	8214779	8237644	22866	intergenic
novel-m0316-3p	novel_circ_001174	49	69	-25.8	0.6232	UGGUCUCGCUGUCCCUCUUCA	|x|||||x|||||x||||||x	AGCAGAGAGACAGAGAGAAGC	NA	A08	-	8214779	8237644	22866	intergenic
novel-m0316-3p	novel_circ_001174	12033	12053	-25.8	0.6232	UGGUCUCGCUGUCCCUCUUCA	|x|||||x|||||x||||||x	AGCAGAGAGACAGAGAGAAGC	NA	A08	-	8214779	8237644	22866	intergenic
novel-m0353-3p	novel_circ_001174	209	230	-30.3	0.7445	AUAGUCCAUAAACUCAUGGUGU	|||o||||o||x||||o|||||	UAUUAGGUGUUGGAGUGCCACA	NA	A08	-	8214779	8237644	22866	intergenic
novel-m0353-3p	novel_circ_001174	12193	12214	-36.9	0.9066	AUAGUCCAUAACCUCAUGGUGU	|||o||||o|||||||o|||||	UAUUAGGUGUUGGAGUGCCACA	NA	A08	-	8214779	8237644	22866	intergenic
novel-m0353-3p	novel_circ_001174	17728	17749	-30.3	0.7445	AUAGUCCAUAAACUCAUGGUGU	|||o||||o||x||||o|||||	UAUUAGGUGUUGGAGUGCCACA	NA	A08	-	8214779	8237644	22866	intergenic
novel-m0540-5p	novel_circ_001174	209	230	-30.3	0.7445	AUAGUCCAUAAACUCAUGGUGU	|||o||||o||x||||o|||||	UAUUAGGUGUUGGAGUGCCACA	NA	A08	-	8214779	8237644	22866	intergenic
novel-m0540-5p	novel_circ_001174	12193	12214	-36.9	0.9066	AUAGUCCAUAACCUCAUGGUGU	|||o||||o|||||||o|||||	UAUUAGGUGUUGGAGUGCCACA	NA	A08	-	8214779	8237644	22866	intergenic
novel-m0540-5p	novel_circ_001174	17728	17749	-30.3	0.7445	AUAGUCCAUAAACUCAUGGUGU	|||o||||o||x||||o|||||	UAUUAGGUGUUGGAGUGCCACA	NA	A08	-	8214779	8237644	22866	intergenic
novel-m0917-5p	novel_circ_001174	209	230	-30.3	0.7445	AUAGUCCAUAAACUCAUGGUGU	|||o||||o||x||||o|||||	UAUUAGGUGUUGGAGUGCCACA	NA	A08	-	8214779	8237644	22866	intergenic
novel-m0917-5p	novel_circ_001174	12193	12214	-36.9	0.9066	AUAGUCCAUAACCUCAUGGUGU	|||o||||o|||||||o|||||	UAUUAGGUGUUGGAGUGCCACA	NA	A08	-	8214779	8237644	22866	intergenic
novel-m0917-5p	novel_circ_001174	17728	17749	-30.3	0.7445	AUAGUCCAUAAACUCAUGGUGU	|||o||||o||x||||o|||||	UAUUAGGUGUUGGAGUGCCACA	NA	A08	-	8214779	8237644	22866	intergenic
miR2275-x	novel_circ_001187	1869	1886	-19.7	0.7061	GACCCUCCUUUUCUUUCG	x|x|||||||||||||xo	AUCGGAGGAAAAGAAACU	Bra040085	A08	+	12264092	12267656	3565	antisense
miR1134-y	novel_circ_001192	1823	1841	-18.7	0.6192	UUCGUGUCAUUCUUCUGUU	|||||||xx|||||||xo|	AAGCACAAGAAGAAGAAGA	Bra010400	A08	-	13552042	13565170	13129	exon_intron
miR1134-y	novel_circ_001192	4777	4795	-19.8	0.6689	CUCGUCUUCUUCUUCUUUG	x||||x|||||||||||ox	AAGCACAAGAAGAAGAAGA	Bra010400	A08	-	13552042	13565170	13129	exon_intron
miR3511-x	novel_circ_001192	3042	3059	-19.5	0.6678	UACUUGUACUUACUUCUU	|x|ox|||||||||||||	AAGGCCAUGAAUGAAGAA	Bra010400	A08	-	13552042	13565170	13129	exon_intron
novel-m0713-5p	novel_circ_001192	9948	9970	-27.5	0.6944	UAGGUACACUUGAUGUUUUCUAC	||||||||||||x||o|||||xx	AUCCAUGUGAACGACGAAAGACA	Bra010400	A08	-	13552042	13565170	13129	exon_intron
novel-m0750-3p	novel_circ_001192	1983	2002	-28.3	0.7972	GAGUAGUGAGGUGAAGAGUG	o|||||||||||o|||x|||	UUCAUCACUCCAUUUCCCAC	Bra010400	A08	-	13552042	13565170	13129	exon_intron
novel-m0868-3p	novel_circ_001192	1983	2002	-28.3	0.7972	GAGUAGUGAGGUGAAGAGUG	o|||||||||||o|||x|||	UUCAUCACUCCAUUUCCCAC	Bra010400	A08	-	13552042	13565170	13129	exon_intron
miR8594-x	novel_circ_001206	80	97	-16.8	0.6245	UACGUAUACUCUUCCUUC	|||x||||||||||x||x	AUGGAUAUGAGAAGCAAA	Bra010585	A08	-	14555354	14556769	1416	exon_intron
novel-m0915-5p	novel_circ_001206	1283	1303	-37.5	0.9843	UCACCCCCUCUUAACAUUGCC	||||||||||||||||||||x	AGUGGGGGAGAAUUGUAACGA	Bra010585	A08	-	14555354	14556769	1416	exon_intron
novel-m0981-5p	novel_circ_001206	1283	1303	-37.5	0.9843	UCACCCCCUCUUAACAUUGCC	||||||||||||||||||||x	AGUGGGGGAGAAUUGUAACGA	Bra010585	A08	-	14555354	14556769	1416	exon_intron
miR5054-y	novel_circ_001211	95	112	-28	0.678	AGGGGUGUCAGGGGCUGG	|||||||||||xx||x|x	UCCCCACAGUCGGCGCCA	Bra010810	A08	+	15791602	15791786	185	antisense
miR5021-x	novel_circ_001213	6927	6944	-18.4	0.6154	UUCUUCUUCUUCUGCUAG	o||||||x|||||x||x|	GAGAAGACGAAGAAGAAC	Bra010817	A08	+	15826243	15833254	7012	exon_intron
miR824-x	novel_circ_001214	949	967	-20.2	0.7138	GUCUGGUAAACAAUCUCUA	o|||||||||||x|||xx|	UAGACCAUUUGUGAGAAUU	Bra010817	A08	-	15831256	15840603	9348	antisense
miR5021-x	novel_circ_001215	1343	1360	-18.4	0.6154	UUCUUCUUCUUCUGCUAG	o||||||x|||||x||x|	GAGAAGACGAAGAAGAAC	Bra010817	A08	+	15831827	15841012	3061	exon_intron
miR5658-x	novel_circ_001219	268	287	-28.5	0.8769	CUAAUUCUACUACUGCUACU	|||||x||||||||||||||	GAUUAUGAUGAUGACGAUGA	Bra010865	A08	-	16062373	16062935	326	exon_intron
miR5021-x	novel_circ_001241	538	555	-21.8	0.7148	UGCUUCUGCUUCUUCGAG	ox|||||||||||||xx|	GAGAAGACGAAGAAGAAC	Bra016669	A08	-	18727214	18727923	710	antisense
novel-m0036-3p	novel_circ_001258	3857	3877	-25.3	0.6487	AAACUAUACCUCAUCCCCACC	|xx||||||||||x|||x|||	UGAGAUAUGGAGUUGGGUUGG	Bra034241	A09	-	1428015	1434397	6383	exon_intron
miR1134-y	novel_circ_001264	64	82	-19.1	0.6453	UUCUUCUUCUUCUUCUCUU	|||x|x||||||||||xo|	AAGCACAAGAAGAAGAAGA	Bra036111	A09	-	2420696	2420941	246	antisense
miR5021-x	novel_circ_001264	65	82	-19.2	0.6337	UUCUUCUUCUUCUUCUCU	o||||||x||||||||xx	GAGAAGACGAAGAAGAAC	Bra036111	A09	-	2420696	2420941	246	antisense
miR5021-x	novel_circ_001264	134	151	-18.2	0.6087	UUCUUCAGUUUCUUCUUC	o|||||x|o||||||||x	GAGAAGACGAAGAAGAAC	Bra036111	A09	-	2420696	2420941	246	antisense
miR5021-x	novel_circ_001264	200	217	-19.8	0.6471	UUCUUCUUCUUCUUCUUC	o||||||x|||||||||x	GAGAAGACGAAGAAGAAC	Bra036111	A09	-	2420696	2420941	246	antisense
miR5656-y	novel_circ_001264	113	130	-21.2	0.6444	CGACUUCAUCUCGGACUC	xx||||||||||x|||o|	AGUGAAGUAGAGACUGGG	Bra036111	A09	-	2420696	2420941	246	antisense
miR5021-x	novel_circ_001282	4921	4938	-20.7	0.6832	CUCUUCUUUUUCUUCUUC	|||||||xo||||||||x	GAGAAGACGAAGAAGAAC	Bra027772	A09	-	6716433	6729306	7430	exon_intron
miR824-x	novel_circ_001282	284	302	-19.1	0.6678	CUCUGGUGAACUCUCCUAA	x||||||o|||x|||x|||	UAGACCAUUUGUGAGAAUU	Bra027772	A09	-	6716433	6729306	7430	exon_intron
miR825-x	novel_circ_001282	5148	5169	-34.1	0.7857	GGUUUGUGGUCGACCUUCUUCG	o|||o||||||||x||||||||	UCAAGCACCAGCUCGAAGAAGC	Bra027772	A09	-	6716433	6729306	7430	exon_intron
miR7772-x	novel_circ_001283	1660	1677	-23	0.6183	GACGCCAACCACCUCUAU	o||||||xx|||||||x|	UUGCGGUCCGUGGAGACA	Bra027772	A09	-	6716926	6721276	4351	intronic
miR1134-y	novel_circ_001289	6739	6757	-19	0.6441	UUCUUUUUCUUCUUUUUAU	|||x|x||||||||o||x|	AAGCACAAGAAGAAGAAGA	Bra027053	A09	+	8435384	8463931	27735	exon_intron
novel-m0713-5p	novel_circ_001289	15640	15662	-35	0.8838	UAGGUACACUUGUUGUUUUCUGC	||||||||||||o||o||||||x	AUCCAUGUGAACGACGAAAGACA	Bra027053	A09	+	8435384	8463931	27735	exon_intron
novel-m0808-5p	novel_circ_001289	14508	14528	-31.9	0.8201	CUCUCUGAGGUGACAUUCCAG	x|||||x||||||||o|||||	AAGAGAAUCCACUGUGAGGUC	Bra027053	A09	+	8435384	8463931	27735	exon_intron
miR5021-x	novel_circ_001295	204	221	-19.8	0.6622	UUCUUCUUCUUCUACAUG	o||||||x|||||x|x||	GAGAAGACGAAGAAGAAC	Bra027850	A09	-	9687294	9687557	264	antisense
novel-m0142-5p	novel_circ_001303	1500	1522	-37.8	0.9947	UGCCUCCCAUUGUAUACAAUUGC	||||||||||||||||||||||x	ACGGAGGGUAACAUAUGUUAACA	Bra027501	A09	+	11313391	11316628	3238	antisense
novel-m0135-3p	novel_circ_001306	12171	12191	-24.6	0.7961	AUCCUAAAUCCCAAAUCACAA	||x||||||||||||||xx||	UAUGAUUUAGGGUUUAGGAUU	Bra027553	A09	-	11731010	11747949	16763	exon_intron
novel-m0135-3p	novel_circ_001306	12192	12212	-25.4	0.822	AUUCUAAAUCCCAAAUCCCUA	||x|||||||||||||||xx|	UAUGAUUUAGGGUUUAGGAUU	Bra027553	A09	-	11731010	11747949	16763	exon_intron
novel-m0135-3p	novel_circ_001306	12213	12233	-25.4	0.822	AGCCUAAAUCCCAAAUCCUUA	|xx||||||||||||||||x|	UAUGAUUUAGGGUUUAGGAUU	Bra027553	A09	-	11731010	11747949	16763	exon_intron
novel-m0161-3p	novel_circ_001306	12219	12239	-23	0.7099	UCCCAAAGCCUAAAUCCCAAA	||x||||x|||||||||||||	AGAGUUUAGGAUUUAGGGUUU	Bra027553	A09	-	11731010	11747949	16763	exon_intron
novel-m0225-3p	novel_circ_001306	12219	12239	-23	0.7099	UCCCAAAGCCUAAAUCCCAAA	||x||||x|||||||||||||	AGAGUUUAGGAUUUAGGGUUU	Bra027553	A09	-	11731010	11747949	16763	exon_intron
novel-m0350-5p	novel_circ_001306	11965	11985	-23.7	0.7337	AUUUGGGUUCUUAAUGAGAAA	|o|||||||||||x||||x||	UGAACCCAAGAAUAACUCAUU	Bra027553	A09	-	11731010	11747949	16763	exon_intron
novel-m0392-3p	novel_circ_001306	12219	12239	-23	0.7099	UCCCAAAGCCUAAAUCCCAAA	||x||||x|||||||||||||	AGAGUUUAGGAUUUAGGGUUU	Bra027553	A09	-	11731010	11747949	16763	exon_intron
novel-m0399-3p	novel_circ_001306	12167	12187	-31.7	0.9784	UAAAUCCCAAAUCACAAAACG	|||||||||||||x|x||x|x	AUUUAGGGUUUAGGGAUUAGA	Bra027553	A09	-	11731010	11747949	16763	exon_intron
novel-m0399-3p	novel_circ_001306	12188	12208	-31.7	0.9814	UAAAUCCCAAAUCCCUAAUCC	||||||||||||||||||||x	AUUUAGGGUUUAGGGAUUAGA	Bra027553	A09	-	11731010	11747949	16763	exon_intron
novel-m0399-3p	novel_circ_001306	12209	12229	-31.7	0.9814	UAAAUCCCAAAUCCUUAAUUC	||||||||||||||o||||ox	AUUUAGGGUUUAGGGAUUAGA	Bra027553	A09	-	11731010	11747949	16763	exon_intron
novel-m0611-5p	novel_circ_001306	12219	12239	-23	0.7099	UCCCAAAGCCUAAAUCCCAAA	||x||||x|||||||||||||	AGAGUUUAGGAUUUAGGGUUU	Bra027553	A09	-	11731010	11747949	16763	exon_intron
novel-m0760-3p	novel_circ_001306	12171	12192	-26.8	0.8508	AAUCCUAAAUCCCAAAUCACAA	||||||||||||x|||||||||	UUAGGAUUUAGGAUUUAGUGUU	Bra027553	A09	-	11731010	11747949	16763	exon_intron
novel-m0812-3p	novel_circ_001306	12167	12187	-31.7	0.9784	UAAAUCCCAAAUCACAAAACG	|||||||||||||x|x||x|x	AUUUAGGGUUUAGGGAUUAGA	Bra027553	A09	-	11731010	11747949	16763	exon_intron
novel-m0812-3p	novel_circ_001306	12188	12208	-31.7	0.9814	UAAAUCCCAAAUCCCUAAUCC	||||||||||||||||||||x	AUUUAGGGUUUAGGGAUUAGA	Bra027553	A09	-	11731010	11747949	16763	exon_intron
novel-m0812-3p	novel_circ_001306	12209	12229	-31.7	0.9814	UAAAUCCCAAAUCCUUAAUUC	||||||||||||||o||||ox	AUUUAGGGUUUAGGGAUUAGA	Bra027553	A09	-	11731010	11747949	16763	exon_intron
miR5021-x	novel_circ_001322	3653	3670	-18.8	0.6104	CUCUUCUCCUUCUACUUC	|||||||x|||||x|||x	GAGAAGACGAAGAAGAAC	Bra029464	A09	+	17513043	17517010	3903	exon_intron
miR845-x	novel_circ_001328	13053	13074	-30.5	0.7625	GCGAGACUAUGGUGAACAAUCA	o||||||||||||x|||||o|x	UGCUCUGAUACCAAUUGUUGGC	Bra029555	A09	-	18257541	18277340	14756	exon_intron
novel-m0047-5p	novel_circ_001328	5452	5473	-30.3	0.7445	AUAGUCCAUAAACUCAUGGUGU	|||o||||o||x||||o|||||	UAUUAGGUGUUGGAGUGCCACA	Bra029555	A09	-	18257541	18277340	14756	exon_intron
novel-m0312-5p	novel_circ_001328	5452	5473	-30.3	0.7445	AUAGUCCAUAAACUCAUGGUGU	|||o||||o||x||||o|||||	UAUUAGGUGUUGGAGUGCCACA	Bra029555	A09	-	18257541	18277340	14756	exon_intron
novel-m0353-3p	novel_circ_001328	5452	5473	-30.3	0.7445	AUAGUCCAUAAACUCAUGGUGU	|||o||||o||x||||o|||||	UAUUAGGUGUUGGAGUGCCACA	Bra029555	A09	-	18257541	18277340	14756	exon_intron
novel-m0540-5p	novel_circ_001328	5452	5473	-30.3	0.7445	AUAGUCCAUAAACUCAUGGUGU	|||o||||o||x||||o|||||	UAUUAGGUGUUGGAGUGCCACA	Bra029555	A09	-	18257541	18277340	14756	exon_intron
novel-m0917-5p	novel_circ_001328	5452	5473	-30.3	0.7445	AUAGUCCAUAAACUCAUGGUGU	|||o||||o||x||||o|||||	UAUUAGGUGUUGGAGUGCCACA	Bra029555	A09	-	18257541	18277340	14756	exon_intron
miR845-x	novel_circ_001329	17886	17907	-30.5	0.7625	GCGAGACUAUGGUGAACAAUCA	o||||||||||||x|||||o|x	UGCUCUGAUACCAAUUGUUGGC	Bra029555	A09	-	18257541	18282288	19589	exon_intron
novel-m0047-5p	novel_circ_001329	10285	10306	-30.3	0.7445	AUAGUCCAUAAACUCAUGGUGU	|||o||||o||x||||o|||||	UAUUAGGUGUUGGAGUGCCACA	Bra029555	A09	-	18257541	18282288	19589	exon_intron
novel-m0312-5p	novel_circ_001329	10285	10306	-30.3	0.7445	AUAGUCCAUAAACUCAUGGUGU	|||o||||o||x||||o|||||	UAUUAGGUGUUGGAGUGCCACA	Bra029555	A09	-	18257541	18282288	19589	exon_intron
novel-m0353-3p	novel_circ_001329	10285	10306	-30.3	0.7445	AUAGUCCAUAAACUCAUGGUGU	|||o||||o||x||||o|||||	UAUUAGGUGUUGGAGUGCCACA	Bra029555	A09	-	18257541	18282288	19589	exon_intron
novel-m0540-5p	novel_circ_001329	10285	10306	-30.3	0.7445	AUAGUCCAUAAACUCAUGGUGU	|||o||||o||x||||o|||||	UAUUAGGUGUUGGAGUGCCACA	Bra029555	A09	-	18257541	18282288	19589	exon_intron
novel-m0917-5p	novel_circ_001329	10285	10306	-30.3	0.7445	AUAGUCCAUAAACUCAUGGUGU	|||o||||o||x||||o|||||	UAUUAGGUGUUGGAGUGCCACA	Bra029555	A09	-	18257541	18282288	19589	exon_intron
novel-m0399-3p	novel_circ_001336	18482	18502	-24.4	0.7416	UCUAUCCCAAAUCCCAAAUCA	|xx||||||||||||x||||x	AUUUAGGGUUUAGGGAUUAGA	Bra023215	A09	-	20668621	20693321	23637	exon_intron
novel-m0812-3p	novel_circ_001336	18482	18502	-24.4	0.7416	UCUAUCCCAAAUCCCAAAUCA	|xx||||||||||||x||||x	AUUUAGGGUUUAGGGAUUAGA	Bra023215	A09	-	20668621	20693321	23637	exon_intron
novel-m0399-3p	novel_circ_001337	22341	22361	-24.4	0.7416	UCUAUCCCAAAUCCCAAAUCA	|xx||||||||||||x||||x	AUUUAGGGUUUAGGGAUUAGA	Bra023215	A09	-	20668621	20697180	27496	exon_intron
novel-m0812-3p	novel_circ_001337	22341	22361	-24.4	0.7416	UCUAUCCCAAAUCCCAAAUCA	|xx||||||||||||x||||x	AUUUAGGGUUUAGGGAUUAGA	Bra023215	A09	-	20668621	20697180	27496	exon_intron
novel-m0084-5p	novel_circ_001338	6043	6063	-20.5	0.7428	UUCACUACAUCAAAAUUUUAA	|||x|||||||||||||||||	AAGGGAUGUAGUUUUAAAAUU	NA	A09	-	20729500	20741521	12022	intergenic
miR5021-x	novel_circ_001363	50	67	-20.4	0.6823	UUCUUCUUCUUCUUCCUA	o||||||x|||||||x|x	GAGAAGACGAAGAAGAAC	Bra032810	A09	+	23811729	23812019	291	antisense
miR1134-y	novel_circ_001369	7537	7555	-21.7	0.7306	UCGGUGUUCUUCUCCUUCU	|xx||||||||||x|||||	AAGCACAAGAAGAAGAAGA	Bra024613	A09	+	25246118	25261435	15318	antisense
miR5021-x	novel_circ_001370	3	20	-20.3	0.6789	UUCUCCUUCUUCUUCUUC	o|||x||x|||||||||x	GAGAAGACGAAGAAGAAC	Bra024611	A09	+	25295024	25295239	216	antisense
novel-m0045-5p	novel_circ_001375	800	821	-31.8	0.7813	AAACCGGUCCAGAUCGACGUAC	|||||||o|||o|||||x|||x	UUUGGCCGGGUUUAGCUUCAUC	Bra036100	A09	-	26828696	26833687	4992	exon_intron
novel-m0085-5p	novel_circ_001375	3018	3040	-23.7	0.6093	AUCUCACUAUAUUGCUUCUGUAU	||||||||||||ox|x|||x|||	UAGAGUGAUAUAGGGUAGAGAUA	Bra036100	A09	-	26828696	26833687	4992	exon_intron
novel-m0887-5p	novel_circ_001375	800	821	-31.8	0.7813	AAACCGGUCCAGAUCGACGUAC	|||||||o|||o|||||x|||x	UUUGGCCGGGUUUAGCUUCAUC	Bra036100	A09	-	26828696	26833687	4992	exon_intron
miR5021-x	novel_circ_001380	46	63	-19.5	0.6331	AUCUUCUCCUUCUUCUUC	x||||||x|||||||||x	GAGAAGACGAAGAAGAAC	NA	A09	+	27164906	27165101	196	intergenic
novel-m0727-5p	novel_circ_001385	5849	5869	-24.9	0.7176	AAAUGUCUCAGUUAUACUCAG	|||||||||||x|x|||||||	UUUACAGAGUCUACAUGAGUC	Bra006907	A09	+	27592571	27612592	19877	exon_intron
novel-m0953-5p	novel_circ_001388	3368	3389	-27.6	0.6765	AACACCAAAGGUUAAGGGGCUU	||||||||x||o||||||xx||	UUGUGGUUCCCGAUUCCCGAAA	Bra007007	A09	+	28290051	28302258	11430	exon_intron
miR9563-x	novel_circ_001390	2521	2543	-28.6	0.8746	UUGAGCAGAGAAUUGAAAAUUGA	||xx|||||||||||||||||||	AAACCGUCUCUUAACUUUUAACU	Bra007077	A09	-	28690098	28694439	4342	intronic
novel-m0006-5p	novel_circ_001390	2531	2553	-32.3	0.8613	UCCUAUAUUCUUGAGCAGAGAAU	o|x||||||||||||||||||||	GGAAUAUAAGAACUCGUCUCUUA	Bra007077	A09	-	28690098	28694439	4342	intronic
miR5021-x	novel_circ_001398	6103	6120	-18.7	0.6172	UUCUUCUUCUUCUACAUG	o||||||x|||||x|x||	GAGAAGACGAAGAAGAAC	Bra007389	A09	-	30479746	30488477	8390	exon_intron
miR5656-y	novel_circ_001398	3757	3774	-20.3	0.606	ACACUACAUCUCUGAACU	x||||x|||||||||x|o	AGUGAAGUAGAGACUGGG	Bra007389	A09	-	30479746	30488477	8390	exon_intron
miR5072-x	novel_circ_001400	74	91	-26.1	0.6887	GGUGGUCACUUUAGAGGU	o|x||||||||o||x|||	UCCCCAGUGAAGUCGCCA	Bra007440	A09	-	30739775	30741011	1237	antisense
miR5072-x	novel_circ_001400	1218	1235	-26.1	0.6887	GGGGAUCACUUUAGAGGU	o|||x||||||o||x|||	UCCCCAGUGAAGUCGCCA	Bra007440	A09	-	30739775	30741011	1237	antisense
novel-m0510-3p	novel_circ_001403	1246	1267	-23.6	0.7307	UAUACAAAUCUACCUGGUUGAU	||||x|||||||||||o|||xx	AUAUAUUUAGAUGGACUAACCU	Bra007592	A09	+	31444717	31449001	3896	exon_intron
novel-m0634-5p	novel_circ_001429	491	511	-31.1	0.7623	AAUUCCACAGGUGCAUCCGUU	x||ox||||||||||||||o|	AUAGAGUGUCCACGUAGGCGA	NA	A09	-	35000149	35000689	541	intergenic
novel-m0697-3p	novel_circ_001429	491	511	-31.1	0.7623	AAUUCCACAGGUGCAUCCGUU	x||ox||||||||||||||o|	AUAGAGUGUCCACGUAGGCGA	NA	A09	-	35000149	35000689	541	intergenic
novel-m0861-5p	novel_circ_001429	491	511	-31.1	0.7623	AAUUCCACAGGUGCAUCCGUU	x||ox||||||||||||||o|	AUAGAGUGUCCACGUAGGCGA	NA	A09	-	35000149	35000689	541	intergenic
bra-miR158-3p	novel_circ_001433	14332	14352	-20.5	0.6426	AAUAGUUUACAUCUGACUCGU	||xx|||||||||||xx||||	UUUCCAAAUGUAGACAAAGCA	Bra026882	A09	+	35844414	35861876	17363	exon_intron
bra-miR161-5p	novel_circ_001433	323	343	-26.5	0.7615	AGUUGCGUAACUUUCACUGCU	||||o|||x||||||||||x|	UCAAUGCACUGAAAGUGACUA	Bra026882	A09	+	35844414	35861876	17363	exon_intron
miR1134-y	novel_circ_001433	12310	12328	-24.1	0.8142	GUAGUGUUCUUCUUCUUCG	x|x|||||||||||||||x	AAGCACAAGAAGAAGAAGA	Bra026882	A09	+	35844414	35861876	17363	exon_intron
miR8594-x	novel_circ_001433	4609	4626	-17	0.6182	UACCUAUUCUCUUCUUAU	|||||||x||||||x|x|	AUGGAUAUGAGAAGCAAA	Bra026882	A09	+	35844414	35861876	17363	exon_intron
miR1134-y	novel_circ_001445	10020	10038	-20.6	0.6959	UUCGAUUUCUUCUUCUUCC	||||xx||||||||||||x	AAGCACAAGAAGAAGAAGA	Bra031584	A09	-	37422293	37468429	44862	exon_intron
miR1134-y	novel_circ_001445	18333	18351	-18.9	0.6258	UUAGUUUUCUUCUUCUUUG	||x||x|||||||||||ox	AAGCACAAGAAGAAGAAGA	Bra031584	A09	-	37422293	37468429	44862	exon_intron
miR477-x	novel_circ_001445	41445	41464	-26.9	0.6708	UUAGAGGAAGUUUCGGAGGU	|x|||||x||||o||o||||	ACUCUCCCUCAAGGCUUCCA	Bra031584	A09	-	37422293	37468429	44862	exon_intron
miR5021-x	novel_circ_001445	16625	16642	-19.7	0.6589	UGCCUCUGCUUCUUCUCG	ox|x||||||||||||x|	GAGAAGACGAAGAAGAAC	Bra031584	A09	-	37422293	37468429	44862	exon_intron
miR5021-x	novel_circ_001445	27649	27666	-21	0.6931	UUCUUCUGCUUCUUGCUA	o|||||||||||||xx|x	GAGAAGACGAAGAAGAAC	Bra031584	A09	-	37422293	37468429	44862	exon_intron
miR5293-x	novel_circ_001445	10013	10032	-23.3	0.6601	UUCUUCUUCUUCCUUCUUCU	||||||oox|||||||||||	AAGAAGGGCAAGGAAGAAGA	Bra031584	A09	-	37422293	37468429	44862	exon_intron
miR7121-x	novel_circ_001448	195	212	-25.1	0.711	GAGGAGAGUCACAAGAGG	|||||||oo|||xx||||	CUCCUCUUGGUGAACUCC	Bra032556	A09	+	38348564	38348860	297	one_exon
miR5021-x	novel_circ_001453	72	89	-19.9	0.6568	CUCUUCUUUUUCUUCUAA	|||||||xo|||||||xx	GAGAAGACGAAGAAGAAC	Bra015348	A10	-	1869720	1870349	630	antisense
novel-m0521-3p	novel_circ_001456	3025	3044	-28.9	0.6033	GUAUCCUCCUCUCCUACUCU	||x||||||||o|||x|o||	CAGAGGAGGAGGGGAGGGGA	Bra015257	A10	+	2362023	2377544	15522	antisense
miR5021-x	novel_circ_001460	1232	1249	-22.8	0.7525	CUCGACUGCUUCUUCUUC	|||xx||||||||||||x	GAGAAGACGAAGAAGAAC	Bra033294	A10	-	3083360	3084628	1269	exon_intron
novel-m0521-3p	novel_circ_001479	56	75	-39.4	0.8347	GCCUCCUCCUCCUCUCCCCA	|x||||||||||o||||||x	CAGAGGAGGAGGGGAGGGGA	Bra002861	A10	+	7140863	7141738	876	one_exon
miR825-y	novel_circ_001489	141	161	-25.8	0.6825	AAGAGGUCUUCCCGCUACUUG	|||||x||||||xxx||||||	UUCUCGAGAAGGUGCAUGAAC	Bra002755	A10	-	7907720	7909619	972	annot_exons
miR1134-y	novel_circ_001499	2321	2339	-21.3	0.722	UUCUUCUUCUUCUUUCUCU	|||x|x||||||||ox|||	AAGCACAAGAAGAAGAAGA	Bra002567	A10	-	8899378	8903273	3896	antisense
miR5021-x	novel_circ_001499	2325	2342	-19.8	0.6556	UUCUUCUUCUUCUUCUUU	o||||||x|||||||||x	GAGAAGACGAAGAAGAAC	Bra002567	A10	-	8899378	8903273	3896	antisense
miR7121-x	novel_circ_001505	29652	29669	-23.3	0.6695	AAAGAGAGCCACCUGAGG	x|x||||o||||x|||||	CUCCUCUUGGUGAACUCC	Bra002495	A10	-	9283248	9318961	35714	antisense
novel-m0844-5p	novel_circ_001505	3671	3693	-39.4	1	GGAACCCGGCCAAAAUAAGUUAU	|||||||||||||||||||||||	CCUUGGGCCGGUUUUAUUCAAUA	Bra002495	A10	-	9283248	9318961	35714	antisense
miR399-x	novel_circ_001535	837	854	-22.1	0.6369	UACAGAGGUAACGAUGAC	|x||||||||||xx||||	ACGUCUCCAUUGGCACUG	Bra008911	A10	-	13184820	13186123	1304	antisense
novel-m0799-5p	novel_circ_001538	3392	3412	-25.8	0.7988	UUUUUAUCGUGAUCUUCCUCU	||||||o|||||||||x||||	AAAAAUGGCACUAGAAAGAGA	Bra009023	A10	+	13698775	13706220	6769	exon_intron
novel-m0829-5p	novel_circ_001538	3394	3414	-23	0.6686	AGUUUUUAUCGUGAUCUUCCU	x|||||||||||||xx|o|||	ACAAAAAUAGCACUCAAGGGA	Bra009023	A10	+	13698775	13706220	6769	exon_intron
novel-m0006-5p	novel_circ_001540	935	957	-24.7	0.6604	CAUUAUAUUCUUGAGCAAAGAAU	|x|||||||||||||||x|||||	GGAAUAUAAGAACUCGUCUCUUA	Bra009034	A10	+	13769712	13773063	2507	exon_intron
miR9563-x	novel_circ_001555	1555	1577	-20.9	0.6391	UUUAGCAUAGAAUUGAAAAUUGA	|||x|||x|||||||||||||||	AAACCGUCUCUUAACUUUUAACU	Bra009237	A10	+	14709109	14711540	2432	antisense
miR3699-y	novel_circ_001586	611	628	-19.3	0.7201	UAUUGUCUUCUUUCUAUA	x|o||||||||||||xx|	UUGACAGAAGAAAGAGUU	NA	pseudoChr	+	3445431	3449499	4069	intergenic
miR5021-x	novel_circ_001589	774	791	-20.8	0.6957	UACUGCUGCUUCUUCUUC	ox||x||||||||||||x	GAGAAGACGAAGAAGAAC	NA	pseudoChr	-	4372626	4376331	3706	intergenic
miR7533-y	novel_circ_001607	1267	1285	-25.7	0.6799	CUUUUCCUUCUCUCUUCGA	||o|o|x|o||||||||||	GAGAGGAAGGAGAGAAGCU	NA	pseudoChr	-	9655701	9658310	2610	intergenic
miR1134-y	novel_circ_001612	2141	2159	-18.4	0.6073	UUCGUGUACUUGUUUUUAU	|||||||x|||x||o||x|	AAGCACAAGAAGAAGAAGA	Bra040683	pseudoChr	+	11807312	11811940	3363	exon_intron
miR1134-y	novel_circ_001614	4505	4523	-19.5	0.661	UUCGUAUACUUCUUCUUCU	|||||x|x|||||||||||	AAGCACAAGAAGAAGAAGA	Bra040759	pseudoChr	+	12733761	12752778	13525	exon_intron
miR1134-y	novel_circ_001614	10095	10113	-18.5	0.6229	UCGGUGUUUUUCAUCUUCU	|xx|||||o|||x||||||	AAGCACAAGAAGAAGAAGA	Bra040759	pseudoChr	+	12733761	12752778	13525	exon_intron
miR1134-y	novel_circ_001615	4505	4523	-19.5	0.661	UUCGUAUACUUCUUCUUCU	|||||x|x|||||||||||	AAGCACAAGAAGAAGAAGA	Bra040759	pseudoChr	+	12733761	12759710	20457	exon_intron
miR1134-y	novel_circ_001615	10095	10113	-18.5	0.6229	UCGGUGUUUUUCAUCUUCU	|xx|||||o|||x||||||	AAGCACAAGAAGAAGAAGA	Bra040759	pseudoChr	+	12733761	12759710	20457	exon_intron
miR7121-x	novel_circ_001616	215	232	-22.5	0.6303	AAGGAGAACCACCGUAGG	x|||||||||||xxx|||	CUCCUCUUGGUGAACUCC	Bra040763	pseudoChr	+	12775350	12778575	3158	exon_intron
miR5185-y	novel_circ_001617	2134	2151	-25.2	0.7139	CCUCUAACCGAACCUUCU	||||o|||||||x||||x	GGAGGUUGGCUUAGAAGC	Bra040763	pseudoChr	-	12775350	12778575	3226	antisense
novel-m0980-3p	novel_circ_001617	1573	1593	-21.8	0.6469	CAAAGCUUGAAACUACUAAAC	x||x||o|||||||||||||x	AUUCCGGACUUUGAUGAUUUC	Bra040763	pseudoChr	-	12775350	12778575	3226	antisense
miR5149-y	novel_circ_001618	3584	3601	-21.9	0.693	CUAGACGCUUCUAAGUUC	||x|||o|||||||o|o|	GAGCUGUGAAGAUUUAGG	NA	pseudoChr	-	12777961	12798391	20431	intergenic
miR845-x	novel_circ_001634	773	794	-26.9	0.6776	ACGAGACUAUGGUGAACUACUC	|||||||||||||x|||x||ox	UGCUCUGAUACCAAUUGUUGGC	NA	pseudoChr	-	18637241	18640403	3163	intergenic
miR1134-y	novel_circ_001635	60396	60414	-20.8	0.6887	AUCGUUUUUUUCUUCUUCU	x||||x||o||||||||||	AAGCACAAGAAGAAGAAGA	NA	pseudoChr	+	19635377	19721333	85957	intergenic
miR1153-y	novel_circ_001635	30700	30717	-17.6	0.6007	GAUUAGUGGUCAUAAUGA	x||||o|||||||xx|||	GUAAUUACCAGUAGCACU	NA	pseudoChr	+	19635377	19721333	85957	intergenic
miR5021-x	novel_circ_001635	20344	20361	-21.5	0.7143	CUCUUCUUCUUCUUCUCG	|||||||x||||||||x|	GAGAAGACGAAGAAGAAC	NA	pseudoChr	+	19635377	19721333	85957	intergenic
miR5021-x	novel_circ_001635	32520	32537	-19.5	0.6393	UUCUUCUUCUUCUUCUCG	o||||||x||||||||x|	GAGAAGACGAAGAAGAAC	NA	pseudoChr	+	19635377	19721333	85957	intergenic
miR5568-x	novel_circ_001635	75540	75559	-18.3	0.6267	CAAAGUUUAAUGAACAGCAA	|||x|||||||ox|||||||	GUUCCAAAUUAUAUGUCGUU	NA	pseudoChr	+	19635377	19721333	85957	intergenic
miR7533-y	novel_circ_001635	20140	20158	-28.1	0.7513	GUCUCCUCUCUCUCUUCGU	x||||||xo|||||||||x	GAGAGGAAGGAGAGAAGCU	NA	pseudoChr	+	19635377	19721333	85957	intergenic
novel-m0084-5p	novel_circ_001635	71716	71736	-22.1	0.8007	UUUUCUACAUCGAAAUUUUAA	||oo|||||||o|||||||||	AAGGGAUGUAGUUUUAAAAUU	NA	pseudoChr	+	19635377	19721333	85957	intergenic
novel-m0350-5p	novel_circ_001635	25447	25467	-27.9	0.8611	ACUUGGGUUCUUGCUGAGUAU	||||||||||||ox||||||x	UGAACCCAAGAAUAACUCAUU	NA	pseudoChr	+	19635377	19721333	85957	intergenic
novel-m0975-5p	novel_circ_001635	47944	47965	-24.3	0.7064	UCUAAGGCAAUGUAAAUUAAGU	||||||||||||o|||o|x|x|	AGAUUCCGUUACGUUUGACUAA	NA	pseudoChr	+	19635377	19721333	85957	intergenic
novel-m0135-3p	novel_circ_001636	10654	10674	-20	0.6494	AUCCUAUAUCCCAAACCCAAA	||x|||x||||||||x||x||	UAUGAUUUAGGGUUUAGGAUU	NA	pseudoChr	-	20328086	20384602	56517	intergenic
novel-m0135-3p	novel_circ_001636	10732	10752	-22.9	0.7435	AUCCUAUAUCCCAAACCCAAA	||x|||x||||||||x||x||	UAUGAUUUAGGGUUUAGGAUU	NA	pseudoChr	-	20328086	20384602	56517	intergenic
novel-m0161-3p	novel_circ_001636	10593	10613	-25	0.7716	UCCUAAAUCCUAAAUCCCUUA	||xo||||||||||||||xx|	AGAGUUUAGGAUUUAGGGUUU	NA	pseudoChr	-	20328086	20384602	56517	intergenic
novel-m0161-3p	novel_circ_001636	10738	10758	-23.6	0.7262	ACCCAAAUCCUAUAUCCCAAA	x|x|||||||||x||||||||	AGAGUUUAGGAUUUAGGGUUU	NA	pseudoChr	-	20328086	20384602	56517	intergenic
novel-m0225-3p	novel_circ_001636	10593	10613	-25	0.7716	UCCUAAAUCCUAAAUCCCUUA	||xo||||||||||||||xx|	AGAGUUUAGGAUUUAGGGUUU	NA	pseudoChr	-	20328086	20384602	56517	intergenic
novel-m0225-3p	novel_circ_001636	10738	10758	-23.6	0.7262	ACCCAAAUCCUAUAUCCCAAA	x|x|||||||||x||||||||	AGAGUUUAGGAUUUAGGGUUU	NA	pseudoChr	-	20328086	20384602	56517	intergenic
novel-m0392-3p	novel_circ_001636	10593	10613	-25	0.7716	UCCUAAAUCCUAAAUCCCUUA	||xo||||||||||||||xx|	AGAGUUUAGGAUUUAGGGUUU	NA	pseudoChr	-	20328086	20384602	56517	intergenic
novel-m0392-3p	novel_circ_001636	10738	10758	-23.6	0.7262	ACCCAAAUCCUAUAUCCCAAA	x|x|||||||||x||||||||	AGAGUUUAGGAUUUAGGGUUU	NA	pseudoChr	-	20328086	20384602	56517	intergenic
novel-m0399-3p	novel_circ_001636	10570	10590	-24	0.7407	UAAAUUUCAAAUCCCAAAUCA	|||||oo||||||||x||||x	AUUUAGGGUUUAGGGAUUAGA	NA	pseudoChr	-	20328086	20384602	56517	intergenic
novel-m0611-5p	novel_circ_001636	10593	10613	-25	0.7716	UCCUAAAUCCUAAAUCCCUUA	||xo||||||||||||||xx|	AGAGUUUAGGAUUUAGGGUUU	NA	pseudoChr	-	20328086	20384602	56517	intergenic
novel-m0611-5p	novel_circ_001636	10738	10758	-23.6	0.7262	ACCCAAAUCCUAUAUCCCAAA	x|x|||||||||x||||||||	AGAGUUUAGGAUUUAGGGUUU	NA	pseudoChr	-	20328086	20384602	56517	intergenic
novel-m0760-3p	novel_circ_001636	10594	10615	-25.5	0.8044	AAUCCUAAAUCCUAAAUCCCUU	||||||||||||||||||x|xx	UUAGGAUUUAGGAUUUAGUGUU	NA	pseudoChr	-	20328086	20384602	56517	intergenic
novel-m0812-3p	novel_circ_001636	10570	10590	-24	0.7407	UAAAUUUCAAAUCCCAAAUCA	|||||oo||||||||x||||x	AUUUAGGGUUUAGGGAUUAGA	NA	pseudoChr	-	20328086	20384602	56517	intergenic
novel-m0915-5p	novel_circ_001636	26169	26189	-31.6	0.8165	UCACCCCCUCUUAACAUCACU	|||||||||||||||||xx||	AGUGGGGGAGAAUUGUAACGA	NA	pseudoChr	-	20328086	20384602	56517	intergenic
novel-m0981-5p	novel_circ_001636	26169	26189	-31.6	0.8165	UCACCCCCUCUUAACAUCACU	|||||||||||||||||xx||	AGUGGGGGAGAAUUGUAACGA	NA	pseudoChr	-	20328086	20384602	56517	intergenic

## Sheet: Table S4
Table S4. Differentially expressed circRNAs and their target genes in the circRNA–miRNA–mRNA network involved in stress responses of B. rapa.
CircRNA ID	miRNA ID	Target gene ID	Symbol	Description
novel_circ_000495	miR7121-x	Bra004951	CYP86A8	PREDICTED: cytochrome P450 86A8 [Brassica rapa]
		Bra013568	Zmynd15	PREDICTED: zinc finger MYND domain-containing protein 15 [Brassica rapa]
		Bra022410	At1g49730	PREDICTED: probable receptor-like protein kinase At1g49730 [Brassica rapa]
		Bra029715	At5g15080	PREDICTED: probable receptor-like protein kinase At3g55450 [Brassica rapa]
		Bra036269	LECRK43	PREDICTED: L-type lectin-domain containing receptor kinase IV.4-like, partial [Brassica rapa]
	miR5656-y	Bra010573	ATHB-40	PREDICTED: homeobox-leucine zipper protein ATHB-40-like [Brassica napus]
		Bra011339	-	PREDICTED: zinc finger protein ZIC 2 isoform X2 [Brassica oleracea var. oleracea] [Brassica oleracea]
		Bra019321	CRK15	PREDICTED: cysteine-rich receptor-like protein kinase 15 [Brassica oleracea var. oleracea] [Brassica oleracea]
		Bra026508	CYP705A20	PREDICTED: cytochrome P450 705A5-like [Brassica rapa]
	miR3699-y	Bra000130	At2g39360	PREDICTED: probable receptor-like protein kinase At2g39360 [Brassica rapa]
		Bra011685	SAMT	PREDICTED: salicylate carboxymethyltransferase [Brassica rapa]
		Bra015587	At2g14510	PREDICTED: leucine-rich repeat receptor-like serine/threonine-protein kinase At2g14510 isoform X2 [Brassica napus]
		Bra016207	CRK2	PREDICTED: cysteine-rich receptor-like protein kinase 2 [Brassica rapa]
		Bra017763	SAMT	PREDICTED: salicylate carboxymethyltransferase-like [Brassica rapa]
		Bra027938	At3g47570	PREDICTED: LOW QUALITY PROTEIN: probable LRR receptor-like serine/threonine-protein kinase At3g47570 [Brassica rapa]
		Bra030340	At2g43260	PREDICTED: F-box/LRR-repeat protein At2g43260-like isoform X2 [Brassica rapa]
		Bra034551	FBL15	PREDICTED: F-box/LRR-repeat protein 15-like [Brassica napus]
novel_circ_001061	miR5043-x	Bra000372	ZAT4	PREDICTED: zinc finger protein ZAT4 isoform X1 [Brassica rapa]
		Bra015917	At1g74360	PREDICTED: probable LRR receptor-like serine/threonine-protein kinase At1g74360 [Brassica rapa]
		Bra037299	NERD	PREDICTED: zinc finger CCCH domain-containing protein 19 [Brassica rapa]

## Sheet: Table S5
Table S5. Primers used in this study.
RNA ID	Forward (5′-3′)	Reverse (5′-3′)
novel_circ_000006	TCTAGACGATATGGGAGGTTCA	AGCAACGTGGAAGTCGTCAA
novel_circ_000074	TCCGTCAGAGAAGAGGGATGT	GCCACTCCCACCCAACTTA
novel_circ_000127	TTGCGGTGAAGAGGCTATCA	TCAAGGCTTTTGTTGGGCAC
novel_circ_000169	CTCGGGAAAAGCAGACAGAC	TATTTAGCGGCCAGTTGCGTC
novel_circ_000171	AATGGGATTTGTGGGAGGCG	AGATCTGGTAGTTTCAACATTCAGT
novel_circ_000206	TGAGCGTGACATCCTAACCA	CACGAGCCAATTCCTCTCTGA
novel_circ_000248	GAGCAGGTGATCATTGGTGG	GGGCTCTTAACCAAAGAGATCAA
novel_circ_000440	TGTGTGCAACAAGCAGGCAT	ACCTCTTGTTCGGGTCAGAG
novel_circ_000442	GCAGGCACATTGCTTCTACTC	AGGCGATTACCTCTTGTTCGG
novel_circ_000485	GTTGCTGCTGCAATAGGTTTT	CGGAAGCTCAGAAAGACATCGT
novel_circ_000495	CGGAATCAGGACGTTGGCTT	ACTGGCACCAGAAGATGTGT
novel_circ_000527	GGTGAACCGGAGGTGATGAG	CTAGCGTAAGGAAAGACAGG
novel_circ_000566	CCCCAAGCTTGTTCTGTGAA	AACCCAAGGCATTGGTCTTT
novel_circ_000745	AGTCCCTCATCTTGTCTCCAGT	AGCTTGCCTGGCATCTTCTA
novel_circ_000877	TGGTCTGATTGGAACGACGA	GTGGTGGAGAATCATCAGGAAGT
novel_circ_001061	AGACGAATGCGCTTATCAGGA	AGTGGGTTCACTGGGACTCT
novel_circ_001206	GGCCGTTACAATTCTCCCCC	GAGGACGTTGGATCTCCGTG
novel_circ_001390	CGCAGTAGCCAAGCTGGATT	GGGCCAAGCTTTTACAACCA
novel_circ_001403	CGTTGTTTCGCTATTGCGGT	TCCCATTTCACCCTTTTGTTGC
novel_circ_001505	CCTCTGCCTGTGCTGAAACT	AGCTCCGGCGTCTTACTATTC
18s	GTTCTTAGTTGGTGGAGCGATTT	ACCTGTTATTGCCTCAAACTTCC
Bra000130	ACCTCGGTCGGGAAATCAAC	ATGAGGCGAAGGGTTGGAAG
Bra000372	AGTGCGAGACTTGTGGTAAAG	GTCGACGTCATTGTTGTGAAAG
Bra004951	GACTTGACGAGTAAGCCCAATAAC	TACGGTAGGGTTCTGCGTGA
Bra010573	ACCCCACGGTGAGTGACCATAA	GAAGAACGGCAACTTGACGAGG
Bra011339	CAGAGCAGAACCAAAGCGTCA	CACCGTCGCCAAATCCAC
Bra011685	CATCGCCAATCTTGTCGCAC	CGTCGCCTTTCTCCTTGTCA
Bra013568	TTGCTGTAGTCATTGCCGTG	CACCCAAAGATTCAAGCCAT
Bra015587	ACGCAGATAAACACAACCCTC	CATAAGTCTCGTCGTCAGAAGTG
Bra015917	CGGGGAGCTCAGCATATCAG	CAACGACCAAACGGTTGCA
Bra016207	TCAGCCAAGTAGTCCAAACCA	AGTCGTTCAAAGGGAGGTCTC
Bra017763	AAGAGGTGGTTACTGGAGGTCG	AGCAGCACTCGGAGCGTAA
Bra019321	TACGACCATTGAGTCGCTGC	GAGTCAAGCGGGTCTCTTCC
Bra022410	CTGTTACTCAAATGCTTCAGTCCC	CCTCTATCCACCAAACTACGAATG
Bra026508	TGTGTTTGGTTCTTCTGGCTTC	GCTCTCTTTCTTCACTGCCTTATC
Bra027938	AACTTCTTGGGTCGGTTGAG	CTGTCAGACTGTTCTCGTTCATTC
Bra029715	CACCTAAACCTCCAAGCCGTA	TCGTGGTAAACTCCTGCGAG
Bra030340	GCGATGGATTTGGTAAGGAC	ACACGATAAGGAGGCGGATT
Bra034551	GCTATCCCAATGCCACTAAAGT	CACTCCTCAACCTATTACACTCCC
Bra036269	GCCCTACTTTTCTTTTTGTCCC	CCTTGAATCCTTCCGTGGC
Bra037299	CGAACGACCCTAATCTCGCA	GAGACAGGTCTGCGGAAACA
